# Supplementary material for: Flexibility-tuning of dual-display DNA-encoded chemical libraries facilitates cyclic peptide ligand discovery
Source: Springer Nature journal article supplement (doi:10.1038/s41467-025-58507-w), 2025-04-05
Supplement: MOESM1 [file 41467_2025_58507_MOESM1_ESM.pdf]

Supplementary Materials for

**Flexibility-tuning of dual-display DNA-encoded Chemical Libraries facilitates cyclic peptide ligand discovery**

Dimitar Petrov<sup>1</sup>, Louise Plais<sup>1</sup>, Kristina Schira<sup>1</sup>, Junyu Cai<sup>1</sup>, Michelle Keller<sup>1</sup>, Alice Lessing<sup>1</sup>, Gabriele Bassi<sup>2</sup>, Samuele Cazzamalli<sup>2</sup>, Dario Neri<sup>2</sup>, Andreas Gloger<sup>1</sup>, Jörg Scheuermann<sup>1\*</sup>

<sup>1</sup>Institute of Pharmaceutical Sciences, Department of Chemistry and Applied Biosciences, ETH Zurich; 8093 Zurich, Switzerland.

<sup>2</sup>Philochem AG, Libernstrasse 3, 8112 Otelfingen, Switzerland

## Supplementary Information

### DP-DEL

|                                                                    |    |
|--------------------------------------------------------------------|----|
| 1. Abbreviations .....                                             | 4  |
| 2. General Materials and Methods.....                              | 5  |
| 2.1. Materials and Instruments .....                               | 5  |
| 2.2. General on-DNA/LNA Protocols.....                             | 7  |
| 2.3. General Solid-Phase/Solution-Phase Synthesis Procedures ..... | 8  |
| 3. Library Synthesis Preparation .....                             | 10 |
| 3.1. Scaffold Synthesis .....                                      | 10 |
| 3.2. On-DNA Scaffold Deprotection Optimization .....               | 12 |
| 3.3. Positive Control & Dipeptide Building Block Synthesis.....    | 16 |
| 3.4. Amino Acid Coupling Screening .....                           | 20 |
| 3.5. Dipeptide Coupling Optimization .....                         | 22 |
| 3.6. Model Compound Synthesis.....                                 | 25 |
| 4. Library Synthesis.....                                          | 32 |
| 4.1. Library Architecture.....                                     | 32 |
| 4.2. Scaffold Coupling .....                                       | 33 |
| 4.3. Step 1 Headpiece 5' (HP5) Sublibrary .....                    | 34 |
| 4.4. Step 1 Headpiece 3' (HP3) Sublibrary .....                    | 39 |
| 4.5. Step 2 Headpiece 5' (HP5) Sublibrary .....                    | 43 |
| 4.6. Step 2 Headpiece 3' (HP3) Sublibrary .....                    | 48 |
| 4.7. ESAC Library Creation & Derivatization .....                  | 50 |
| 5. Affinity Selections .....                                       | 54 |
| 5.1. Selection Procedure.....                                      | 54 |
| 5.2. PCR Amplification of Library .....                            | 54 |
| 5.3. Proteins for Selections.....                                  | 57 |
| 5.3.1. CAIX.....                                                   | 57 |
| 5.3.2. NSP14.....                                                  | 57 |
| 5.3.3. Thrombin .....                                              | 58 |
| 5.3.4. PLAP .....                                                  | 58 |
| 5.4. Sequencing Fingerprints Analysis .....                        | 59 |
| 5.4.1. Notes of Fingerprint Analysis.....                          | 59 |
| 5.4.2. Statistical Analysis.....                                   | 60 |
| 5.4.3. Library Fingerprints.....                                   | 62 |

|        |                                                                             |     |
|--------|-----------------------------------------------------------------------------|-----|
| 6.     | Hit Resynthesis .....                                                       | 65  |
| 6.1.   | On-LNA Hit Resynthesis .....                                                | 65  |
| 6.1.1. | Negative Control and Scaffold Attachment .....                              | 66  |
| 6.1.2. | PLAP .....                                                                  | 67  |
| 6.1.3. | Thrombin .....                                                              | 74  |
| 6.1.4. | Streptavidin .....                                                          | 78  |
| 6.2.   | Off-DNA Hit Resynthesis .....                                               | 81  |
| 6.2.1. | Absorbance-based Concentration Determination of Fluorescein Labeled Binders | 81  |
| 6.2.2. | General Synthesis Procedure .....                                           | 82  |
| 6.2.3. | Thrombin (Compounds 19-24) .....                                            | 82  |
| 6.2.4. | PLAP (Compounds 29 & 30) .....                                              | 88  |
| 6.2.5. | Streptavidin (Compounds 34-40) .....                                        | 92  |
| 6.2.6. | Negative Control .....                                                      | 100 |
| 7.     | Hit Validation .....                                                        | 101 |
| 7.1.   | Fluorescence Polarization .....                                             | 101 |
| 7.2.   | Inhibition Assays .....                                                     | 104 |
| 7.2.1. | Thrombin .....                                                              | 104 |
| 7.2.2. | PLAP .....                                                                  | 104 |
| 8.     | Unprocessed Gel Images .....                                                | 106 |

## 1. Abbreviations

DCM: dichloromethane  
DIPEA: N,N-Diisopropylethylamine  
DMF: Dimethylformamide  
DMSO: Dimethyl sulfoxide  
DMT-MM: (4-(4,6-dimethoxy-1,3,5-triazin-2-yl)-4-methyl-morpholinium chloride)  
EDC: 1-Ethyl-3-(3-dimethylaminopropyl)carbodiimide  
EF: enrichment factor  
Equiv.: equivalent  
Fmoc: fluorenylmethoxycarbonyl protecting group  
Boc: tert-butyloxycarbonyl protecting group  
Alloc: N-Allyloxycarbonyl protecting group  
PLAP: Placental Alkaline Phosphatase  
NSP14: nonstructural protein 14  
CAIX: carbonic anhydrase IX  
CuAAC: copper-catalysed azide–alkyne cycloaddition  
TBTA: Tris((1-benzyl-4-triazolyl)methyl)amine  
HATU: Hexafluorophosphate Azabenzotriazole Tetramethyl Uronium  
HOBT: Hydroxybenzotriazole  
HOAT: 1-Hydroxy-7-azabenzotriazole  
HPLC: High-performance liquid chromatography  
MPLC: Medium Pressure Liquid Chromatography  
IC<sub>50</sub>: Half-maximal inhibitory concentration  
K<sub>D</sub>: dissociation constant  
LC-MS: Liquid chromatography–mass spectrometry  
UPLC-MS: Ultra-performance liquid chromatography–mass spectrometry  
S-NHS: N-hydroxysulfosuccinimide  
mQ: Milli-Q® Ultrapure Water  
PBS: Phosphate-buffered saline  
MOPS: 3-(N-morpholino)propanesulfonic acid  
RP: reverse phase  
RT: room temperature  
TCEP: tris(2-carboxyethyl)phosphine  
TEAA: Triethylammonium acetate  
TEA: triethylamine  
TFA: trifluoroacetic acid  
Tris: tris(hydroxymethyl)aminomethane  
LNA: locked nucleic acid  
TIPS: Triisopropyl silane  
EDTA: Ethylenediaminetetraacetic acid  
NMM: N-Methylmorpholine

## **2. General Materials and Methods**

### **2.1. Materials and Instruments**

#### **Material**

DNA material was obtained from LGC Biosearch Technologies (Denmark) and Microsynth AG (Switzerland). DNA and fluoresceinated compound concentrations were measured using NanoDrop 2000c Spectrophotometer. Reagents and solvents were purchased from commercial suppliers (ABCR, Sigma Aldrich, Fluorochem, TCI Europe, Alfa Aesar, Enamine, Acros Organics). Water was purified using a Millipore Milli-Q system from Merck. All reaction vessels used for library creation were DNA LoBind® obtained from Eppendorf: 96 well plates (Katalog-Nr. 0030503201), tubes (Katalog-Nr. 0030108078), falcon tubes (Katalog-Nr. 0030122208). Enzymes and other materials related to ligation and polymerization of DNA were purchased from New England Biolabs. Gel purification kits were purchased from Qiagen. Gel images were captured with Bio-Rad Chemidoc. Tentagel® resin was purchased from Rapp Polymere (# S30132).

#### **HPLC Purification of Oligonucleotides**

Preparative RP-HPLC was performed on DNA and LNA conjugates using a Water Alliance RP-HPLC instrument with PDA-UV detector and an XBridge BEH C18 OBD Prep 130 Å, 5 µm 10x150 mm column. Oligos were eluted at 4 mL/min using a gradient of 100 mM TEAA (triethylamine-acetic acid) buffer pH 7 as buffer 1 and a mixture of 80% Acetonitrile, 10% mQ and 10% 1M pH 7 TEAA buffer as buffer 2.

#### **Reverse Phase Purification of Small Molecules**

RP-HPLC purification was done on an Alliance HT instrument from Waters with a Synergi 4 µm Polar-RP 80 Å 10x150 mm column with a flow rate of 4 mL/min. RP-MPLC purification of dipeptides and scaffold was performed on a Büchi system equipped with a FlashPure C18 40 µm irregular column (40g) with a flow rate of 40 mL/min using settings as recommended by manufacturer. Elution was performed using a gradient of 0.1% Formic Acid in mQ as buffer 1 and 0.1% Formic Acid in Acetonitrile as buffer 2. Purified elution fractions were dried in a Christ freeze drier.

#### **UPLC-MS Analysis of Oligonucleotides/Small Molecules**

Oligonucleotide traces were recorded using a Xevo G2-XS Quadrupole Time of Flight (Qtof) Mass Spectrometer LC-MS from Waters on a Xbridge Oligonucleotide BEH C18 10 x 50 mm column at 60 C°. Elution was performed at a flow rate of 0.5 mL/min using 5 mM triethylamine and 400 mM hexafluoroisopropanol as buffer 1 and methanol as buffer 2. Elution was performed as a 0-50% gradient of buffer 2 over 7 minutes (termed “polar” method) or 0-70% (termed “nonpolar” method), in order to better elute conjugates of different hydrophobicity. Most oligonucleotides were analyzed using the polar method, unless otherwise stated.

Small molecule traces were recorded on the same instrument on a BEH C18 2.1 x 50 mm column at 40 C° at a flow rate of 0.6 mL/min using a gradient 0-100% of 0.1% formic acid in mQ as buffer 1 and 0.1% formic acid in Acetonitrile as buffer 2. Samples were tested by

taking a small aliquot of resin, which was cleaved with 95% TFA/ 2.5% TIPS/2.5% water mixture. Obtained mixture was diluted with 50  $\mu$ L methanol, filtered and measured in positive ion mode.

### **Agarose Gel Electrophoresis**

Usual Conditions: Oligonucleotide size and hybridization was analyzed with gel electrophoresis. DNA was run on 3% agarose gel casted using TBE buffer (89 mM Tris, 89 mM boric acid, 0.4 mM EDTA) and stained with GelRed<sup>®</sup> (biotium). Gel was run for 40 min at 90 V and 200 mA using TBE running buffer. 6x Tritrack loading dye was used (Thermofisher) for DNA loading. These conditions were used in gel experiments unless otherwise noted.

Denaturing condition: 3% agarose gel was cast in 30 mM NaCl, 2mM EDTA pH 7.5 buffer, without addition of GelRed<sup>®</sup>. Gel immersed in running buffer (30 mM NaOH, 2 mM EDTA) for 15-30 min. Meanwhile 6x denaturing loading dye (180 mM NaOH, 6 mM EDTA, 18% Ficoll 400, 0.05% bromocresol green) was added to the test DNA. The DNA was then heated to 90 °C and run on the gel electrophoresis at 300 mA and 90V for 1 hour (90V was not reached due to running buffer, but this was the setting used). The gel was then stained for 20-30 min using GelRed<sup>®</sup> and analyzed. Conditions were adapted from Thermo Scientific <sup>1</sup>

### **Speed Vacuum**

DNA samples and other water-containing samples were concentrated and dried using a Christ RVC 2-25 rotational-vacuum-concentrator.

### **Solid-phase Synthesis of Conjugates**

Heidolph Reax 2 and innova 4000 incubator shaker was used for shaking/stirring solid-phase reactions in fritted syringes. Vac-Man<sup>®</sup> Laboratory Vacuum Manifold used for rinsing beads between reactions.

### **Binding & Inhibition Experiments**

For fluorescence polarization and thrombin inhibition assays, 384-well non-binding black plates were used (Greiner Bio-one, 784900). Grenier 384 transparent, flat-bottom well plates were used for PLAP inhibition assays. Measurements were taken on a Spectra Max Paradigm multimode plate reader.

### **Nuclear Magnetic Resonance (NMR) Analysis**

<sup>1</sup>H and <sup>13</sup>C NMR spectra were recorded on a Bruker AV400 (400 MHz and 100 MHz respectively) instrument. Shifts are recorded in parts per million (ppm) and standardized according to residual employed NMR solvent. Coupling constants are reported in hertz (Hz) and the following abbreviations were employed for peak splitting: s = singlet, d = doublet, t = triplet, q = quartet, m = multiplet.

### **Software**

Selection Fingerprint data was displayed and evaluated using MATLAB version R2023b (Mathworks). Selection triplicate count data was concatenated using a Python script. Fluorescence polarization and Inhibition Assay data was fitted and displayed using PRISM 10. NMR was evaluated using Mestrenova 14.2 software

## 2.2. General on-DNA/LNA Protocols

### DNA Precipitation Protocol:

Dissolved DNA was precipitated via addition of 0.1x volume 5M NaCl, followed by the addition of 3 volumes of ethanol. The mixture was then left in a -20 °C freezer overnight. The resulting suspension was centrifuged (25 000 x g, 4 °C) for 30 minutes. The supernatant was discarded, the pellet dried using speed vacuum and recovered as precipitated DNA.

### Scaffold Attachment Procedure

Up to 1 µmol of DNA was dissolved in 800 µL MOPS buffer (50 mM, 0.5 M NaCl, pH 8). In a separate vial a scaffold activation solution was prepared: 320 µL scaffold solution (100 mM, in DMSO) was mixed with 160 µL S-NHS (100mM, in 2:1 DMSO/mQ), 160 µL EDC (100 mM, in DMSO) and 720 µL DMSO. The activation solution was reacted for 30 min at 30 °C and then added to the DNA solution. The reaction was carried out overnight at RT and precipitated. The volumes were scaled accordingly when less DNA starting material was used.

### General Amidation Procedure (DMT-MM)

Up to 60 nmol of DNA was dissolved in 242 µL of borate buffer (85 mM, pH 9.3). To this solution 135 µL of acetonitrile was added, followed by 45 µL of carboxylic acid solution (200 mM, in DMSO). 28 µL of DMT-MM (300 mM, in mQ) was finally added and the reaction was shaken at room temperature for 2 hours. 28 µL of additional DMT-MM solution were then added and the reaction was shaken for further 2 hours and precipitated. Protocol was adapted from Monty et al.<sup>2</sup>

### Optimized Dipeptide Building Block Coupling Procedure (EDC/ HOAt)

Up to 60 nmol of DNA was dissolved in 100 µL MOPS buffer (200 mM, 3 M NaCl, pH 8). In a separate vial 60 µL of 200 mM carboxylic acid in DMSO was mixed with 65 µL of EDC/HOAt/NMM (100:20:100 mM) in DMSO and 170 µL DMSO. Consequently, the DMSO solution was immediately added to the DNA solution. The reaction was shaken for 1 hour and then a second batch of DMSO solution (60 µL carboxylic acid and 60 µL EDC/HOAt/NMM) was added to the reaction, which was further shaken overnight and precipitated.

### Diazotransfer Procedure

Up to 100 nmol of DNA was dissolved in 20 µL mQ and added to a premixed solution of 20 µL CuSO<sub>4</sub> (10 mM, in mQ), 50 µL Imidazole-1-sulfonyl Azide.HCl (200 mM, in mQ) and 200 µL 50 mM K<sub>2</sub>CO<sub>3</sub>. The reaction was allowed to mix overnight at RT. The reaction was analyzed by LC-MS and precipitated.

### Interstrand Click Reaction

To a pre-hybridized solution of up to 10 nmol of HP5 and HP3 strand were added 22 µL of TEAA buffer (1M, pH 7), 32 µL DMSO, 25 µL CuSO<sub>4</sub>/TBTA complex (1 mM, in 55% DMSO) and 25 µL sodium ascorbate (10 mM, in mQ). The reaction was carried out overnight at RT and then precipitated with NaCl. Protocol was adapted from Puglioli et al.<sup>3</sup>

### **Scaffold Deprotection & Disulfide Formation.**

1 nmol of HPLC-purified interstrand clicked library was dissolved in 10  $\mu$ L buffer consisting of sodium acetate (30 mM), ascorbic acid (10 mM), semicarbazide hydrochloride (25 mM) pH 4.75. It was then placed under an UV lamp at 365 nm for 10-15 min at RT.

### **Thioether Formation**

Scaffold deprotected DNA was dissolved in 35  $\mu$ L  $\text{NH}_4\text{HCO}_3$  buffer (60 mM, pH 8), followed by 5.6  $\mu$ L TCEP solution (10 mM, pH 7) and shaken for 1 hour at RT. 11.2  $\mu$ L of bis-electrophile (10 mM) in acetonitrile was then added, 2.8  $\mu$ L acetonitrile and 15.4  $\mu$ L  $\text{NH}_4\text{HCO}_3$  buffer. Reaction was mixed for 2 hours at 30 °C and precipitated. Protocol was adapted from Pham et al. <sup>4</sup>

### **Fmoc Deprotection Procedure**

DNA was dissolved in 10% piperidine in mQ and the deprotection was carried out over 1 hour. The reaction was then quenched using 1.5x volume of 3M sodium acetate pH 4.5 buffer to neutralize the piperidine and the DNA precipitated via addition of ethanol. Alternatively, the deprotection mixture was dried using a speed vacuum, redissolved in water and precipitated with NaCl.

### **Encoding/Ligation Procedure**

1-50 nmol of DNA starting material was dissolved in mQ. 1.5 equivalents of coding strand and 2 equivalents of adaptor strand were added to make a total volume of 180  $\mu$ L. The solution was heated to 80 °C and cooled to RT over 1 hour. 20  $\mu$ L of T4 DNA ligase buffer (10x, NEB) and 400U T4 DNA ligase (NEB) were then added and the ligation was incubated at 16 °C overnight.

### **Terminal Primer Installation/ Polymerization of Large encoding design**

Protocol was followed based on Plais et al. <sup>5</sup>. Briefly 1 nmol of premixed HP5 + HP3 step 2 library pools in any configuration (open, clicked, etc.) was mixed with 2.5 nmol junction primer and 2.5 nmol terminal primer in a total of 100  $\mu$ L mQ. The strands were annealed by raising temperature to 95 °C for 10 min and cooled to room temperature. 50  $\mu$ L of T4 DNA ligase buffer (10x, NEB), DNA polymerase (10U, NEB) and dNTPs (250 nmol) were added and mixture was kept at 16 °C for 30 min. T4 ligase was then added (400U, NEB) and ATP (300 nmol) and kept at 16 °C for a further 1 hour.

## **2.3. General Solid-Phase/Solution-Phase Synthesis Procedures**

### **General solid-phase synthesis procedure**

Commercially available Tentagel® S  $\text{NH}_2$  base resin (Rapp polymere, # S30132) (500-1000 mg, 0.29 mmol/g loading) was swollen in DMF inside of a 10-25 mL fritted syringe. The resin was then manually modified with Fmoc-Rink Amide linker using general procedures for amide coupling and Fmoc deprotection. The resin was then used for hit resynthesis.

**Amide coupling**

DMF was added to free amino modified resin, followed by 2 equivalents of free carboxylic acid building block, 2 equivalents of HATU and 4 equivalents of DIPEA. The reaction was shaken for 2-12 hours and then quenched by removing the solution and washing the resin 5 times with DMF.

**Fmoc deprotection**

Resin was shaken for 1 hour with 20% Piperidine in DMF. The piperidine/DMF solution was then removed and the resin was washed 5 times with DMF.

**Alloc deprotection**

Resin was swollen in DCM. Alloc group at Lysine residue was treated with 0.2 equiv.  $\text{Pd(PPh}_3)_4$  and 10 equiv.  $\text{PhSiH}_3$  in dry DCM for 2-3 hours. The fritted syringe reaction vessel was vented every 10-15 min during the reaction. The resin was then washed 3x with DCM and 5x with DMF.

**Resin cleavage and purification**

The resin was shaken for one hour with a mixture of 95/2.5/2.5 % trifluoroacetic acid/water/triisopropylsilane. The cleavage solution was then removed from the resin and stored. The procedure was repeated one additional time with fresh cleavage solution. The cleaved material was then either precipitated or diluted with MeOH and directly purified via RP-HPLC.

**Peptide precipitation**

5-10 volumes of diethyl ether were added to the peptide cleavage solution. The resulting mixture was kept in a -20 °C freezer for 1-12h and centrifuged. The crude peptide product could then be isolated as a pellet and dried.

**General procedure of CuAAC**

The resin was treated with 3 equiv. of  $\text{CuI}$ , 21 equiv. L-ascorbic and 1.2 equiv. of alkyne in 20% piperidine/DMF for 20 h. The resin was then washed 5x with DMF.

**General procedure of azido-transfer.**

The resin was swollen in DMSO. It was then treated with 3 equiv. of 1H-imidazole-1-sulfonyl azide hydrochloride and 9 equiv. DIPEA in dry DMSO overnight. The resin was then washed 3x with DMSO and 5x with DMF.

**Stbu deprotection and cyclization via thioether formation**

1-2 mM hit intermediate possessing 2 Cys(Stbu) amino acids in 50  $\mu\text{L}$  DMSO was added to 350  $\mu\text{L}$  DMF, 150  $\mu\text{L}$  1M  $\text{NH}_4\text{CO}_3$  pH8 and 50  $\mu\text{L}$  of 160 mM TCEP in 1M  $\text{NH}_4\text{CO}_3$  pH8. The deprotection was carried out over 1h and checked via LC-MS for completion. Upon completion 50  $\mu\text{L}$  of 160 mM bis-electrophile in DMF was added. Reaction was then incubated further for 30 min and checked for completion via LC-MS. Reaction solution was then diluted with MeOH and directly purified via RP-HPLC

### 3. Library Synthesis Preparation

In the process of optimizing various areas of library synthesis, an amino linked 14-mer DNA strand (5'-C6-AminolinkGGAGCTTCTGAATT-3' Mass 4474 Da) was used for test on-DNA reactions. This DNA is referred to as **"test DNA"** in further parts of the supplementary.

Test model compounds were synthesized on two complementary amino linked DNA strands, which were also later used as headpiece strands in actual library synthesis.

**HP5** strand (5'NH<sub>2</sub>-C6-GGAGCTTCTGAATTCTGTGTGCTG[dSpacer][dSpacer][dSpacer][dSpacer]CTGGTCACTC 3')  
Mass 11346 Da

**HP3** strand (5' Phos-AGTCACCTCA[dSpacer][dSpacer][dSpacer][dSpacer]CAGCACACAGAATTCA GAAGCTCC-C6-NH<sub>2</sub> 3') Mass 11313 Da

#### 3.1. Scaffold Synthesis

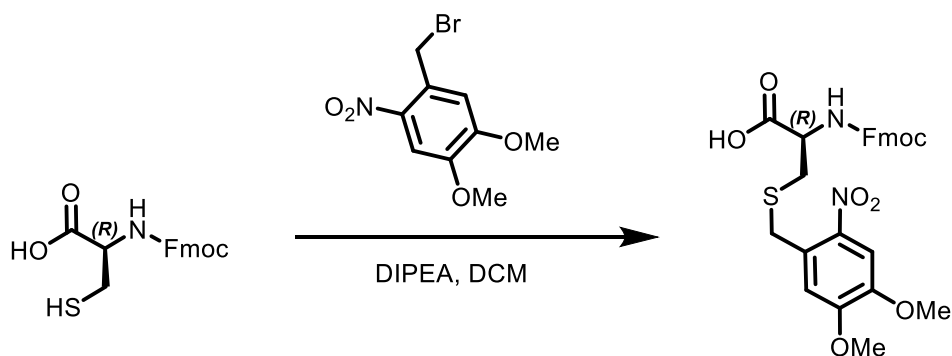

N-(((9H-fluoren-9-yl)methoxy)carbonyl)-S-(4,5-dimethoxy-2-nitrobenzyl)cysteine was synthesized as described in Karas et al. <sup>6</sup>. Briefly, 4,5-Dimethoxy-2-nitrobenzyl bromide (80 mg, 0.29 mmol) was dissolved in 5 mL DCM. 5 equivalents of DIPEA (250  $\mu$ L, 1.45 mmol) were then slowly added, followed by a portion-wise addition of Fmoc-Cys-OH (100 mg, 0.29 mmol). The reaction was covered in aluminum foil to protect from light and left to react at rt overnight. The reaction solution was then reduced, redissolved in Acetonitrile/mQ and directly purified with RP-MPLC. A yellow crystalline powder was obtained after drying the eluted pure product (yields 40-60%). Reaction was scaled successfully with up to 3 times more starting material.

<sup>1</sup>H NMR (400 MHz, DMSO)  $\delta$  7.89 (d,  $J$  = 7.5 Hz, 2H), 7.73 (dd,  $J$  = 8.0, 6.5 Hz, 2H), 7.65 (s, 1H), 7.41 (td,  $J$  = 7.5, 1.2 Hz, 2H), 7.32 (td,  $J$  = 7.4, 1.1 Hz, 2H), 7.15 (s, 1H), 6.97 (d,  $J$  = 8.5 Hz, 0.5H), 6.70 (d,  $J$  = 8.5 Hz, 0.5H), 4.35 – 4.02 (m, 6H), 3.87 (s, 3H), 3.83 (s, 3H), 2.87 (dd,  $J$  = 13.9, 4.5 Hz, 1H), 2.71 (dd,  $J$  = 13.9, 9.7 Hz, 1H).

<sup>13</sup>C NMR (101 MHz, DMSO)  $\delta$  172.27, 156.03, 152.57, 147.43, 143.79, 140.71, 139.78, 130.45, 128.95, 127.64, 127.07, 125.27, 120.11, 115.17, 114.21, 108.86, 65.74, 56.16, 55.98, 53.89, 48.97, 46.60, 33.19, 32.47, 29.11.

ESI-MS: [M+H]<sup>+</sup> 538.14 g/mol, found 539.56

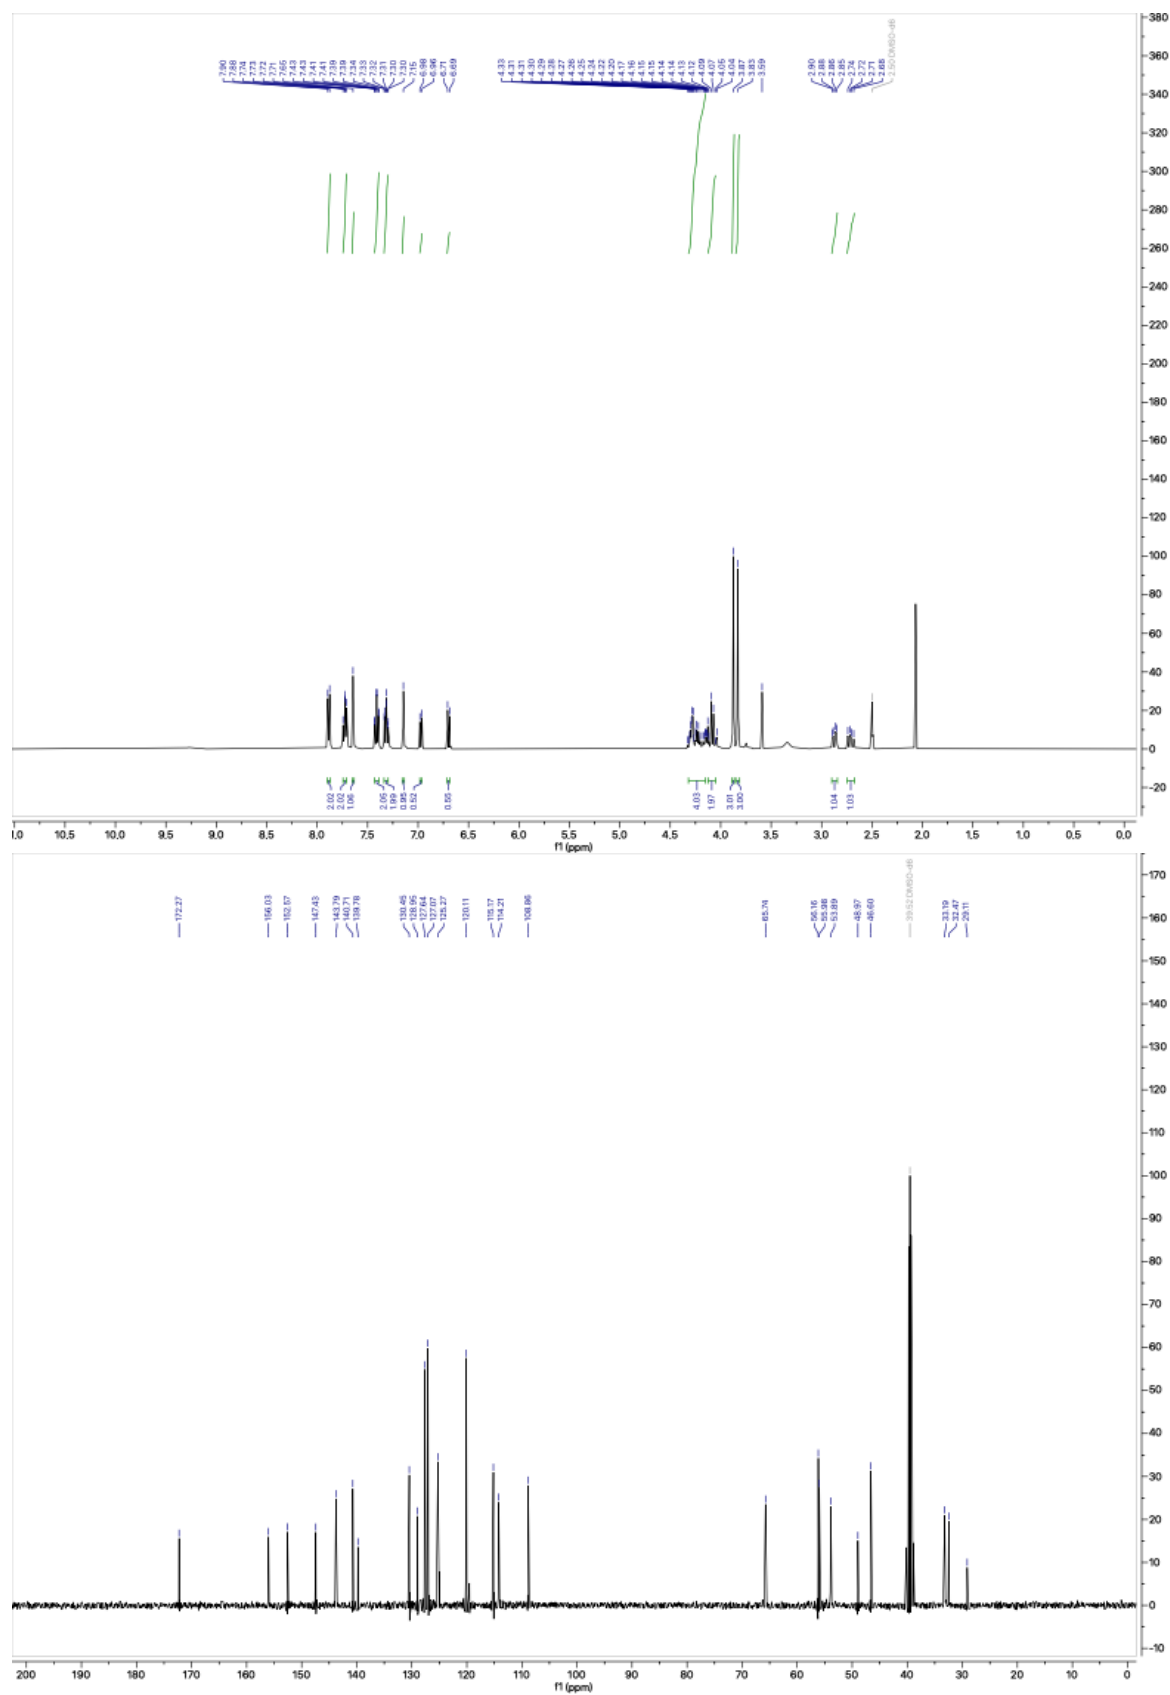

Figure S1:  $^1\text{H}$  NMR and  $^{13}\text{C}$  NMR analysis of protected cysteine scaffold

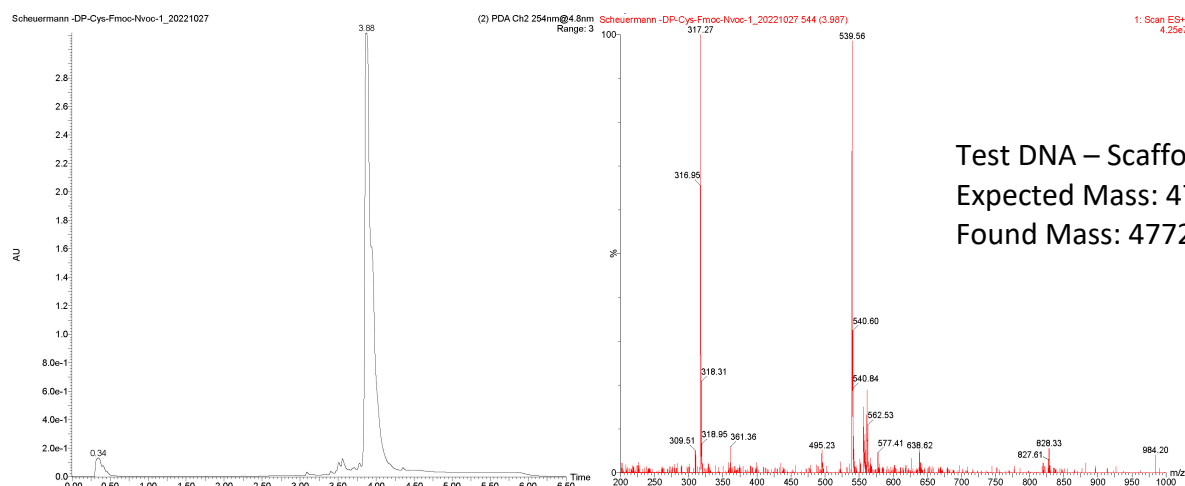

Test DNA – Scaffold  
 Expected Mass: 4773  
 Found Mass: 4772

**Figure S2: LC-MS chromatogram (left) and the corresponding deconvoluted MS spectra (right) of protected cysteine scaffold**

### 3.2. On-DNA Scaffold Deprotection Optimization

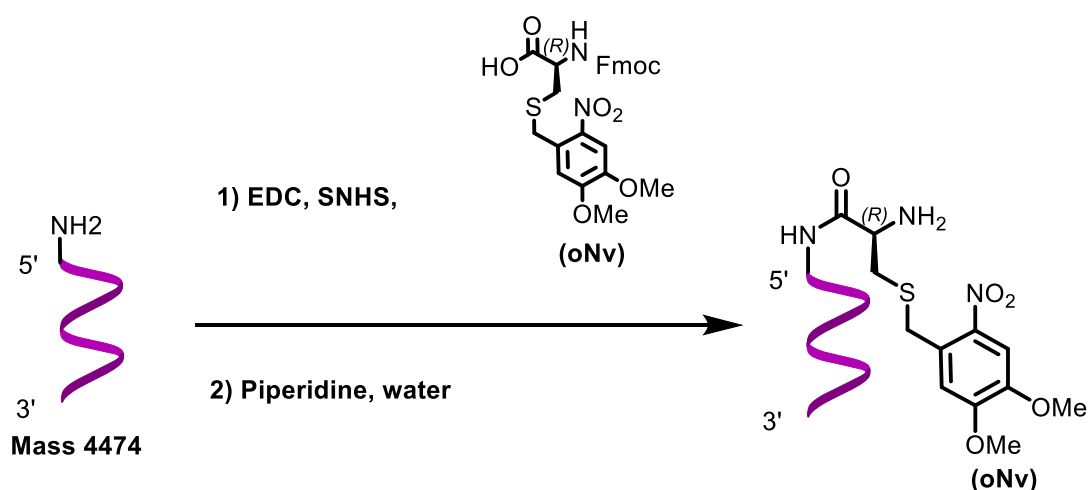

Scaffold was attached to “test DNA” according to general attachment procedure. The DNA was then precipitated and the Fmoc group was removed using general procedures. The product was HPLC purified and used in further experiments.

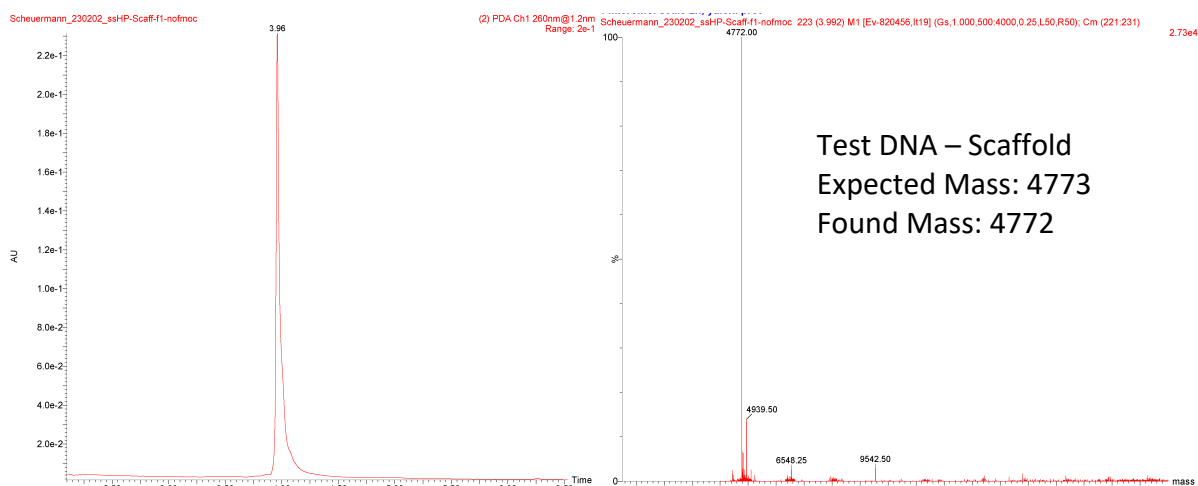

**Figure S3: LC-MS chromatogram (left) and the corresponding deconvoluted MS spectra (right) of cysteine scaffold-test DNA conjugate**

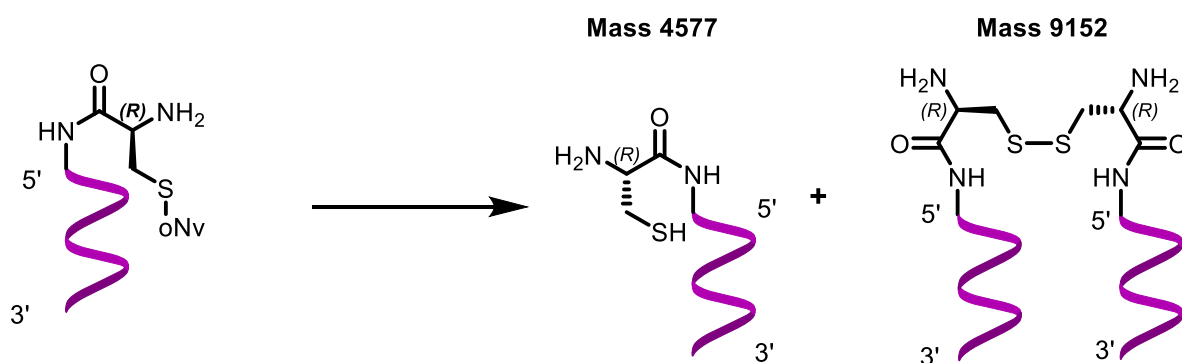

0.5 nmol of scaffold-linked “test DNA” was dissolved in 10-20  $\mu$ L of buffer and the cysteine scaffold was deprotected using an UV lamp at 365 nm using conditions listed in table S1 and Figures S4-6.

**Table S1: Optimization of on-DNA UV deprotection of cysteine 2-nitroveratryl protecting group**

| Condition | Buffer                                           | Temp. (C) | Time (min) | % Starting Material | % Product Disulfide | % Product reduced |
|-----------|--------------------------------------------------|-----------|------------|---------------------|---------------------|-------------------|
| 1         | 50 mM Phosphate Buffer pH 7                      | 4         | 120        | 47.34               | 13.68               | 1.29              |
| 2         | 50 mM Phosphate Buffer pH 7                      | 26        | 15         | 35.16               | 19.38               | 2.64              |
| 3         | 85 mM borate buffer pH 9.3                       | 26        | 15         | 45.44               | 22.14               | 1.1               |
| 4         | 30 mM NaOAc buffer pH 4.75                       | 26        | 15         | 0                   | 35.20               | 12.49             |
| 5         | 30 mM NaOAc buffer + 10 mM ascorbic acid pH 4.75 | 26        | 15         | 0                   | 46.74               | 22.67             |
| 6         | 15 mM NaOAc buffer + 5 mM ascorbic acid + 12.5   | 26        | 15         | 0                   | 61.13               | 6.51              |

|  |                             |  |  |  |  |  |
|--|-----------------------------|--|--|--|--|--|
|  | mM semicarbazide pH<br>4.75 |  |  |  |  |  |
|--|-----------------------------|--|--|--|--|--|

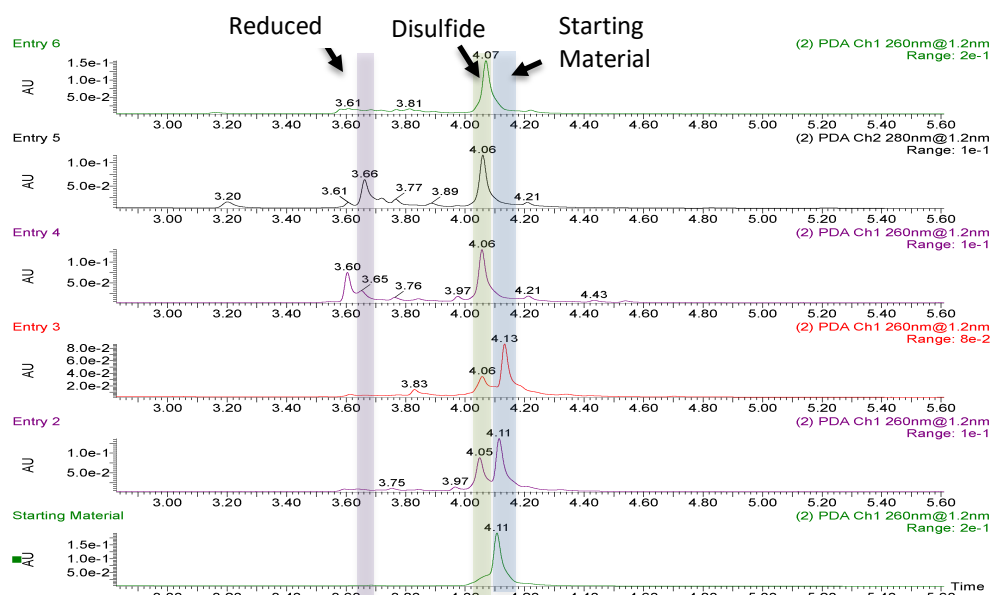

**Figure S4: LC-MS chromatogram (left) and the corresponding deconvoluted MS spectra (right) of various Scaffold deprotection conditions**

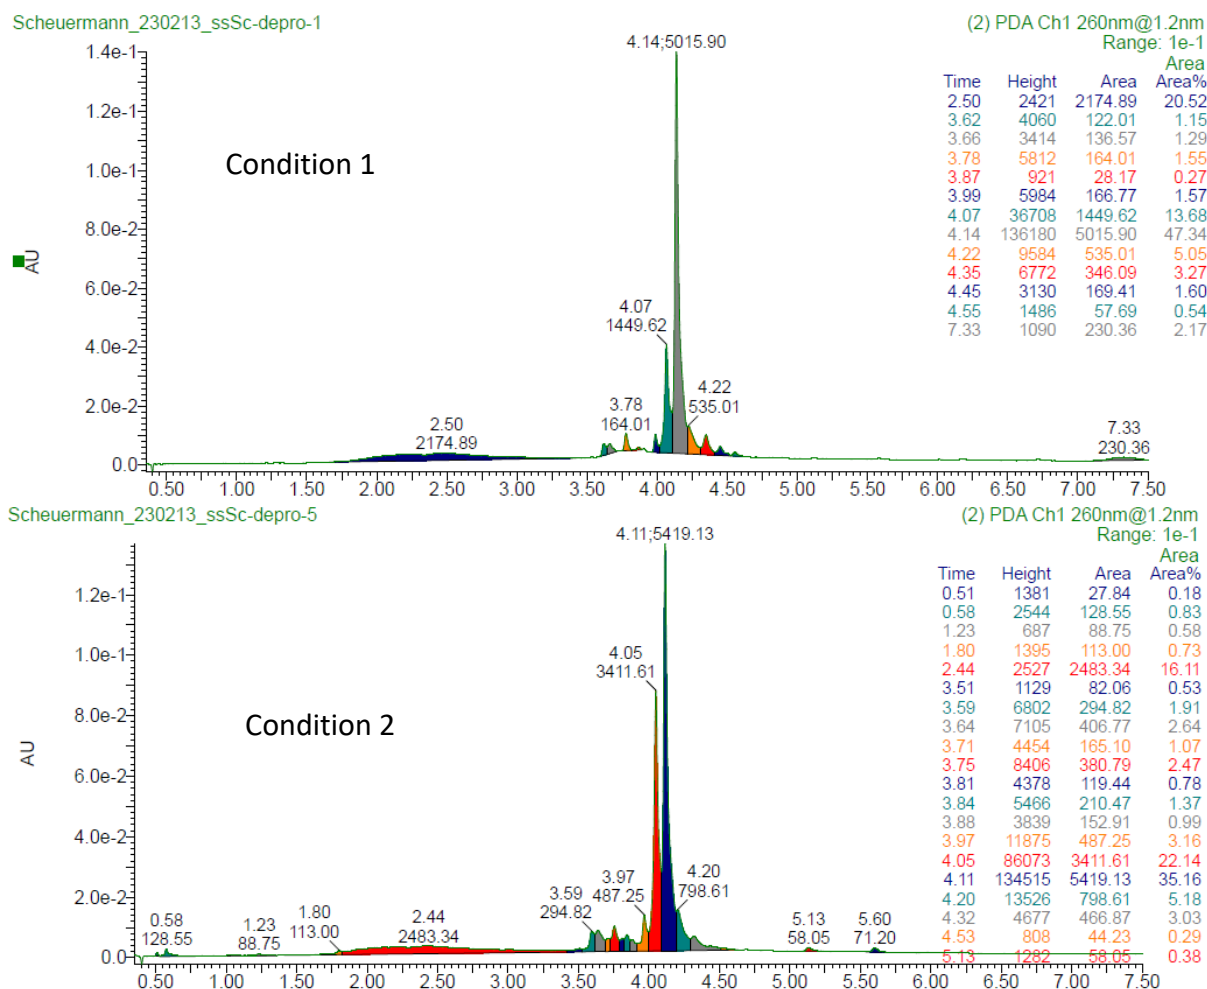

Scheuermann\_230213\_ssSc-depro-8

(2) PDA Ch1 260nm@1.2nm

Range: 9e-2

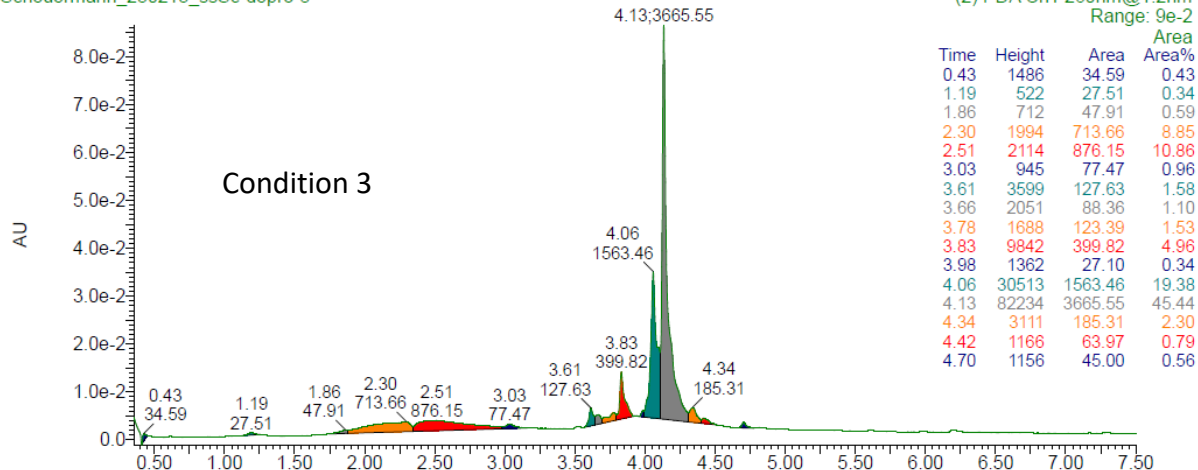

Scheuermann\_230213\_ssSc-depro-7

(2) PDA Ch1 260nm@1.2nm

Range: 1e-1

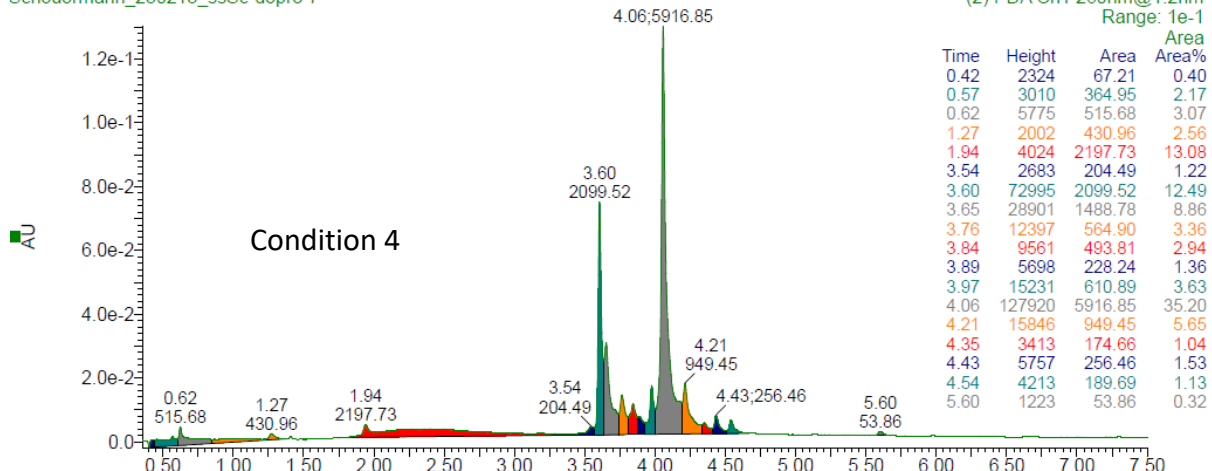

Scheuermann\_230214\_ssSc-depro-3

(2) PDA Ch1 260nm@1.2nm

Range: 2e-1

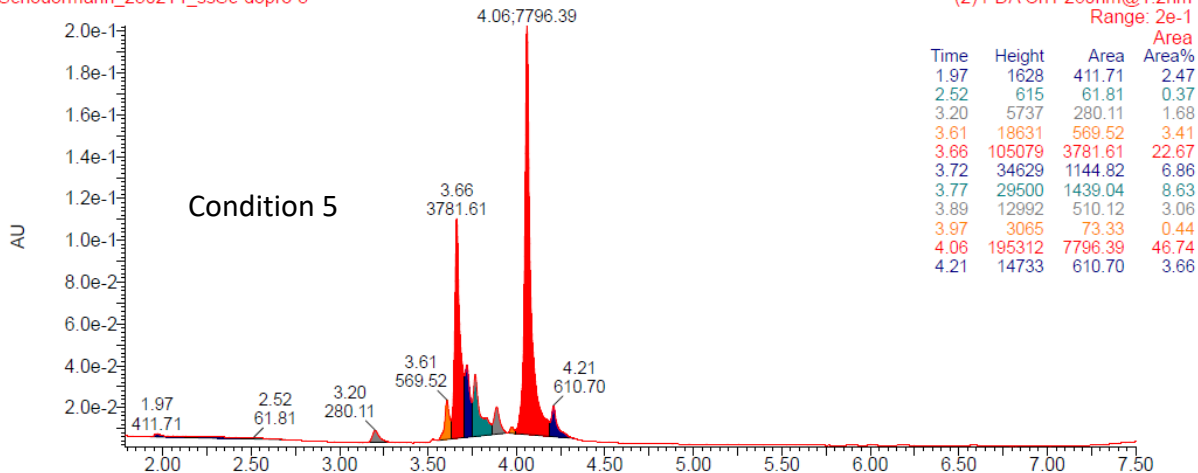

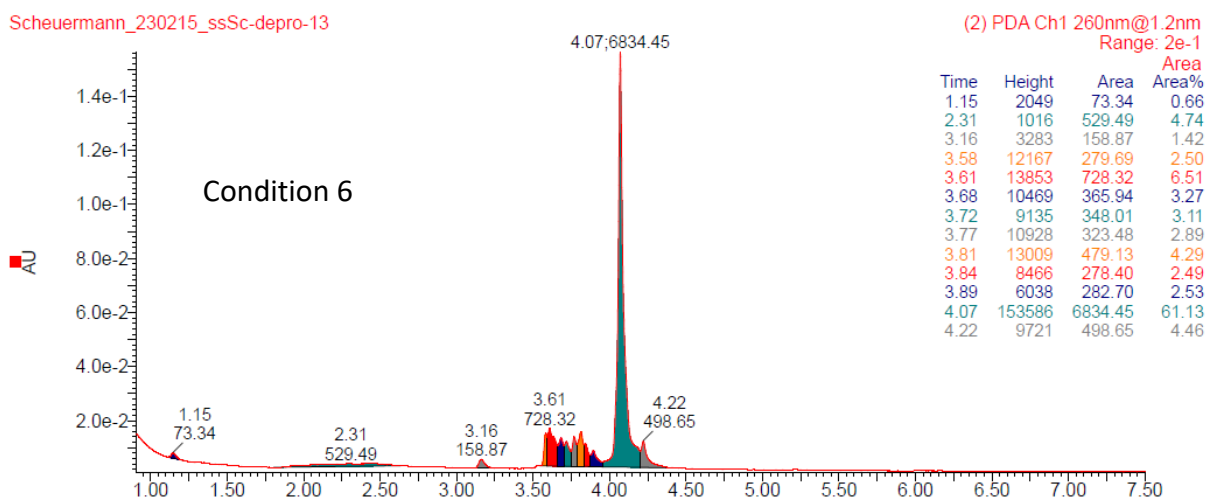

Figure S5: UV 260 nm chromatogram of oNv deprotection of test DNA according to conditions in table S1. Peaks are integrated and used for analysis

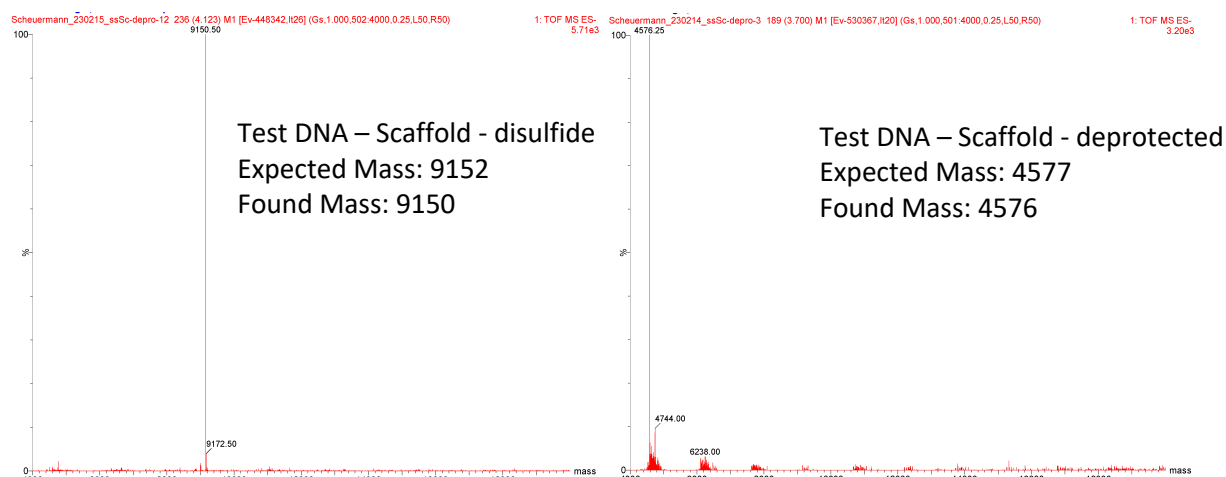

Figure S6: Deconvoluted MS of deprotected disulfide cysteine product and reduced cysteine product

### 3.3. Positive Control & Dipeptide Building Block Synthesis

A summary of all MS-based characterization of synthesized positive controls and dipeptides is given in table S2 and ... .

#### Positive Controls:

N2-(((9H-fluoren-9-yl)methoxy)carbonyl)-N6-(4-sulfamoylbenzoyl)-L-lysine synthesis and characterization via NMR and LC-MS was described in the supplementary of Keller et al. <sup>7</sup>. The same product was used in DP-DEL.

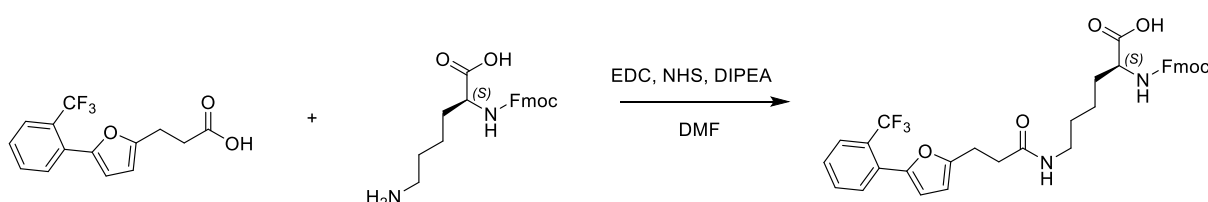

N2-(((9H-fluoren-9-yl)methoxy)carbonyl)-N6-(3-(5-(2-(trifluoromethyl)phenyl)furan-2-yl)propanoyl)-L-lysine was synthesized as listed above. Briefly 3-(5-(2-(trifluoromethyl)phenyl)furan-2-yl)propanoic acid (213 mg, 0.75 mmol) along with 1-hydroxypyrrolidine-2,5-dione (166 mg, 1.45 mmol) were dissolved in 10 mL DMF. EDC.HCl (222 mg, 1.16 mmol) was added and the mixture was stirred for 30-60 min. The resultant activated ester was added along with DIPEA (262  $\mu$ L, 1.5 mmol) to Fmoc-L-Lys-OH (184 mg, 0.5 mmol) and stirred overnight. The reaction was then concentrated, redissolved in ethyl acetate and washed with 1M HCl, water and brine. The organic layer was dried and purified via RP-MPLC to generate a brownish powder (43 mg, 13% yield).

ESI-MS:  $[M+H]^+$  634.22 g/mol, found 635.42

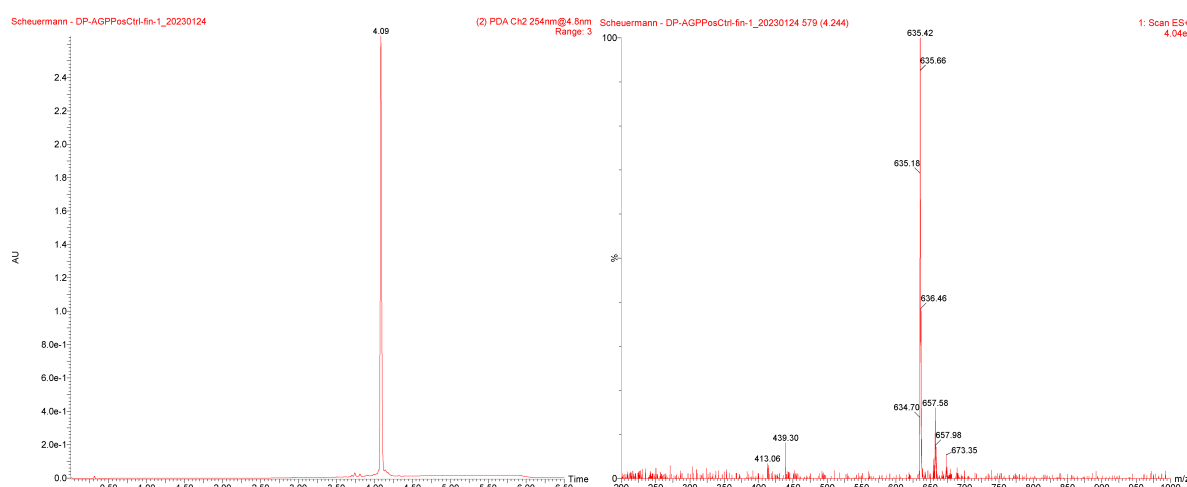

**Figure S7: LC-MS chromatogram (left) and the corresponding deconvoluted MS spectra (right) of N2-(((9H-fluoren-9-yl)methoxy)carbonyl)-N6-(4-sulfamoylbenzoyl)-L-lysine**

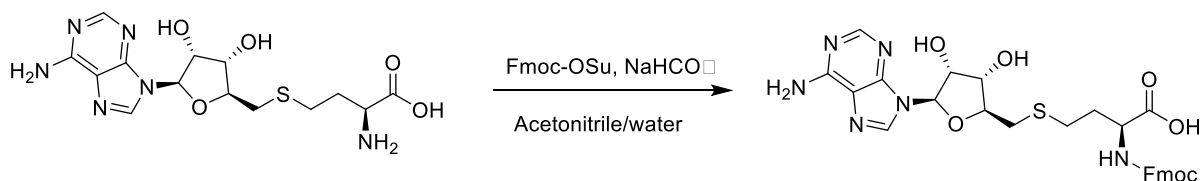

N-(((9H-fluoren-9-yl)methoxy)carbonyl)-S-(((2S,3S,4R,5R)-5-(6-amino-9H-purin-9-yl)-3,4-dihydroxytetrahydrofuran-2-yl)methyl)-L-homocysteine (40 mg, ) was dissolved in 2.5 mL water in presence of 1 equiv. sodium bicarbonate. A solution of Fmoc-Osu (0.9 equiv) in 2.5 mL acetonitrile was added. Product formation was confirmed via LC-MS. Product was isolated via extraction with ethyl acetate, washing with water, brine and the organic layer was dried.

ESI-MS:  $[M+H]^+$  606.18 g/mol, found 607.57

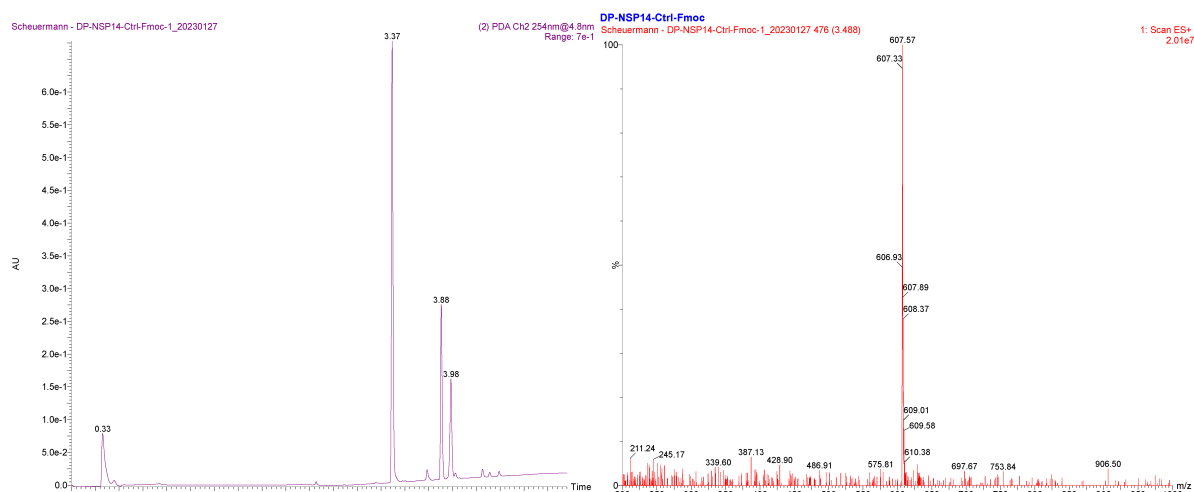

**Figure S8:** LC-MS chromatogram (left) and the corresponding deconvoluted MS spectra (right) of N-(((9H-fluoren-9-yl)methoxy)carbonyl)-S-(((2S,3S,4R,5R)-5-(6-amino-9H-purin-9-yl)-3,4-dihydroxytetrahydrofuran-2-yl)methyl)-L-homocysteine

## Dipeptides:

A total of 75 Fmoc-N-protected dipeptides were produced manually in solution consisting of natural and artificial amino acids, to be used as building blocks in DP-DEL. Production of dipeptides consisted of an amidation of an N-Fmoc protected amino acid with a C-protected amino acid. The C terminus of the resulting crude dipeptide was then deprotected.

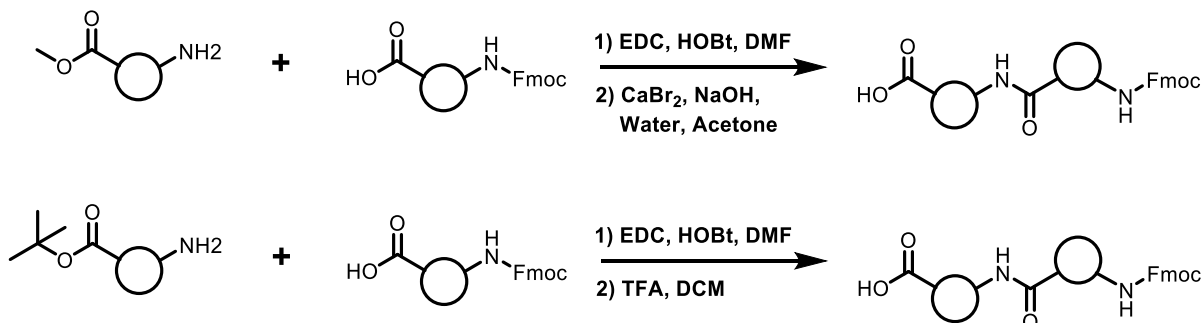

N-Fmoc protected amino acid (1-1.5 mmol) was dissolved in 15 mL DMF. 1 equivalent C-protected amino acid as free base or HCl salt, 1.1 equivalents of DIPEA, 1 equivalent of EDC.HCl and 1.1 equivalents of HOBt were consequently added to the solution. The amidation was performed overnight at rt and checked for completion via LC-MS. The reaction mixture was then dried, redissolved in ethyl acetate and washed with 1M HCl, 5% LiCl and brine. The organic layer was then reconcentrated and used as is for the next step.

If the C-protected dipeptide product was protected with a tBu group, the step 1 crude was dissolved in 1:1 TFA/DCM solution and deprotected over 2 hours and then concentrated. It was then redissolved in 1:1 acetonitrile/water and purified via RP-MPLC.

If the C-protected dipeptide produced was protected with a methyl ester, deprotection was carried as described by Binette et al.<sup>8</sup>. Briefly, the step 1 crude was redissolved via the

addition of 6 mL 5M CaBr<sub>2</sub>, 750 µL 2M NaOH and 16 mL acetone. The deprotection was carried out overnight and checked for completion via LC-MS. The finished reaction was quenched via the addition of 1M HCl, extracted into ethyl acetate and concentrated. The resulting crude was redissolved in 1:1 acetonitrile/water and purified via RP-MPLC.

**Table S2: List of synthesized dipeptides and positive controls and their MS characterization.**

| #  | Dipeptide (N-Fmoc Protected)                                                     | Expected Mass | Found Mass    |
|----|----------------------------------------------------------------------------------|---------------|---------------|
| 1  | L-phenylalanylglycine                                                            | 444.16        | 445.06        |
| 2  | (S)-(2-amino-3-(thiazol-4-yl)propanoyl)glycine                                   | 451.11        | 452.18        |
| 3  | L-glutaminylglycine                                                              | 425.15        | 426.26        |
| 4  | D-leucyl-L-alanine                                                               | 424.19        | 424.9         |
| 5  | ((R)-2-aminohexanoyl)-L-alanine                                                  | 424.19        | 424.98        |
| 6  | ((S)-2-amino-3-(thiazol-4-yl)propanoyl)-L-alanine                                | 465.13        | 466.22        |
| 7  | ((R)-2-amino-3-cyclohexylpropanoyl)-L-serine                                     | 480.22        | 481.07        |
| 8  | L-tyrosyl-L-serine                                                               | 490.17        | 491.47        |
| 9  | D-valyl-L-serine                                                                 | 426.17        | 427.3         |
| 10 | L-prolyl-L-threonine                                                             | 438.17        | 439.38        |
| 11 | D-threonyl-L-threonine                                                           | 442.17        | 443.38        |
| 12 | ((S)-2-amino-2-(2,3-dihydro-1H-inden-2-yl)acetyl)-L-threonine                    | 514.2         | 515.32        |
| 13 | L-valyl-L-leucine                                                                | 452.22        | 453.24        |
| 14 | N <sup>6</sup> -acetyl-L-lysyl-L-leucine                                         | 523.26        | 524.04        |
| 15 | L-glutaminyl-L-leucine                                                           | 481.21        | 482.43        |
| 16 | L-threonyl-L-valine                                                              | 440.19        | 440.9         |
| 17 | L-alanyl-L-valine                                                                | 410.18        | 410.82        |
| 18 | ((R)-2-amino-3-cyanopropanoyl)-L-valine                                          | 435.17        | 436.26        |
| 19 | ((S)-2-amino-4-methoxy-4-oxobutanoyl)-L-valine                                   | 468.18        | 469.47        |
| 20 | (S)-(2-amino-4-methoxy-4-oxobutanoyl)glycine                                     | 426.13        | 427.38        |
| 21 | L-glutaminyl-L-phenylalanine                                                     | 515.2         | 516.6         |
| 22 | ((S)-2-amino-2-(2,3-dihydro-1H-inden-2-yl)acetyl)-L-phenylalanine                | 560.22        | 561.41        |
| 23 | L-leucyl-L-phenylalanine                                                         | 500.22        | 501.24        |
| 24 | D-valyl-L-tyrosine                                                               | 502.2         | 503.22        |
| 25 | ((S)-2-amino-5-ureidopentanoyl)-L-tyrosine                                       | 560.22        | 561.49        |
| 26 | ((R)-2-amino-3-(4-chlorophenyl)propanoyl)-L-tyrosine                             | 584.16        | 585.18        |
| 27 | D-glutaminyl-L-tryptophan                                                        | 554.21        | 555.48        |
| 28 | L-seryl-L-tryptophan                                                             | 513.18        | 514.52        |
| 29 | ((S)-2-amino-3-(4-chlorophenyl)propanoyl)-L-tryptophan                           | 607.18        | 608.45        |
| 30 | L-asparaginy-L-isoleucine                                                        | 467.2         | 468.21        |
| 31 | L-threonyl-L-isoleucine                                                          | 454.2         | 455.22        |
| 32 | D-alanyl-L-isoleucine                                                            | 424.2         | 425.38        |
| 33 | L-threonyl-L-glutamine                                                           | 469.18        | 470.11        |
| 34 | ((R)-2-amino-3-cyanopropanoyl)-L-glutamine                                       | 464.16        | 465.31        |
| 35 | ((S)-2-amino-3-cyclohexylpropanoyl)-L-glutamine                                  | 521.24        | 522.52        |
| 36 | N-glycyl-N-methylglycine                                                         | 368.14        | 368.73        |
| 37 | (S)-N-(2-aminohexanoyl)-N-methylglycine                                          | 424.2         | 425.22        |
| 38 | N-(N <sup>6</sup> ,N <sup>6</sup> -dimethyl-L-lysyl)-N-methyl-L-alanine          | 481.25        | 482.35        |
| 39 | N-(L-tryptophyl)-N-methyl-L-alanine                                              | 511.2         | 512.52        |
| 40 | (R)-1-(N <sup>6</sup> -acetyl-L-lysyl)-4,4-difluoropyrrolidine-2-carboxylic acid | 543.21        | 544.52        |
| 41 | N <sup>1</sup> ,N <sup>1</sup> -dimethylarginylglycine                           | 481.22        | 482.51        |
| 42 | ((S)-2-aminohexanoyl)-L-tyrosine                                                 | 516.22        | 517.56        |
| 43 | (S)-2-(2-aminoacetamido)-4-(tert-butoxy)-4-oxobutanoic acid                      | 468.18        | 491.18 (+ Na) |
| 44 | D-seryl-D-alanine                                                                | 398.14        | 399.15        |
| 45 | ((S)-2-amino-3-(pyridin-3-yl)propanoyl)-D-alanine                                | 459.17        | 461.19        |
| 46 | D-alanyl-D-alanine                                                               | 382.14        | 405.14        |
| 47 | D-leucyl-D-serine                                                                | 440.19        | 441.06        |
| 48 | D-tryptophyl-D-serine                                                            | 513.18        | 514.04        |
| 49 | L-alanyl-L-threonine                                                             | 412.16        | 413.17        |
| 50 | ((S)-2-aminohexanoyl)-D-threonine                                                | 454.2         | 456.27        |
| 51 | ((R)-2-amino-3-(thiazol-4-yl)propanoyl)-D-serine                                 | 481.12        | 481.55        |
| 52 | (S)-3-amino-3-(3-(trifluoromethyl)phenyl)propanoyl)-D-threonine                  | 556.17        | 557.17        |
| 53 | D-tyrosyl-D-leucine                                                              | 516.22        | 517.48        |
| 54 | glycyl-D-leucine                                                                 | 410.18        | 411.22        |
| 55 | D-phenylalanyl-D-leucine                                                         | 500.22        | 501.47        |
| 56 | L-leucyl-D-valine                                                                | 452.22        | 453.14        |
| 57 | ((R)-3-amino-3-(3-(trifluoromethyl)phenyl)propanoyl)-D-valine                    | 554.19        | 555.41        |

|    |                                                                        |        |        |
|----|------------------------------------------------------------------------|--------|--------|
| 58 | ((R)-2-amino-3-(pyridin-3-yl)propanoyl)-D-valine                       | 487.2  | 488.51 |
| 59 | ((R)-2-amino-5-ureidopentanoyl)-D-phenylalanine                        | 544.22 | 545.4  |
| 60 | L-tyrosyl-L-phenylalanine                                              | 550.2  | 551.48 |
| 61 | L-alanyl-D-tyrosine                                                    | 474.17 | 475.19 |
| 62 | D-threonyl-D-tyrosine                                                  | 504.18 | 505.2  |
| 63 | L-isoleucyl-D-tyrosine                                                 | 516.22 | 517    |
| 64 | L-valyl-D-tryptophan                                                   | 525.22 | 526.6  |
| 65 | L-asparaginy-L-glutamine                                               | 482.17 | 483.55 |
| 66 | 2-((S)-2-amino-3-phenylpropanamido)-3-hydroxy-2-methylpropanoic acid   | 488.19 | 489.63 |
| 67 | 2-((S)-2-amino-4-methylpentanamido)-3-hydroxy-2-methylpropanoic acid   | 454.2  | 455.3  |
| 68 | 2-((S)-2-amino-3-phenylpropanamido)-3-(1H-imidazol-1-yl)propanoic acid | 524.2  | 525.56 |
| 69 | 2-((S)-2-amino-5-ureidopentanamido)-3-(1H-imidazol-1-yl)propanoic acid | 534.21 | 535.48 |
| 70 | D-seryl-L-proline                                                      | 424.16 | 425.3  |
| 71 | L-prolyl-L-proline                                                     | 434.18 | 435.3  |
| 72 | D-prolyl-D-proline                                                     | 434.18 | 434.84 |
| 73 | glycyl-D-proline                                                       | 394.14 | 395.21 |
| 74 | D-alanyl-D-proline                                                     | 408.16 | 409.13 |
| 75 | glycyl-L-proline                                                       | 394.14 | 395.37 |
| 76 | N6-(4-sulfamoylbenzoyl)-L-lysine                                       | 551.16 | 552.44 |
| 77 | N6-(3-(5-(2-(trifluoromethyl)phenyl)furan-2-yl)propanoyl)-L-lysine     | 634.22 | 635.42 |
| 78 | S-(5'-adenosyl)-L-homocysteine                                         | 606.18 | 607.57 |

### 3.4. Amino Acid Coupling Screening

The 78 synthesized dipeptides & positive controls, as well as 146 commercially obtained natural and unnatural amino acids were screened for successful amidation with scaffold-linked “test DNA”. The purpose of the experiment was to identify highest yield, generally applicable amidation conditions for library synthesis as well as pre-select building blocks for higher reaction yield and thus library quality.

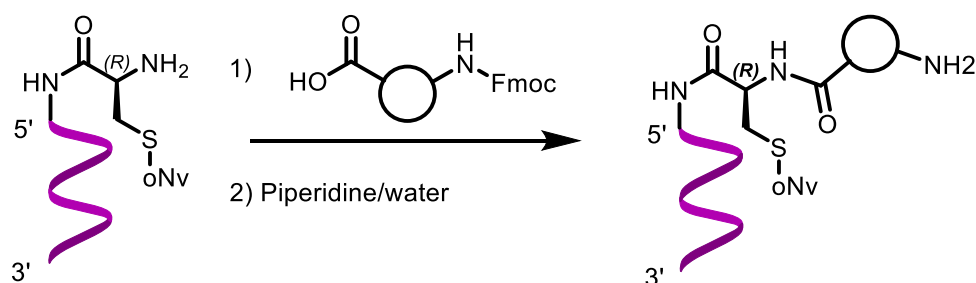

0.5 nmol of scaffold-linked test DNA was inserted into 1 mL 96-well plates and reacted with each respective building block according to general procedures for DMT-MM & diazotransfer in section 2.2, which were scaled accordingly and the following procedure for EDC/HOAt:

#### Unoptimized Dipeptide Building Block Coupling Procedure (EDC/ HOAt)

Dissolve DNA in 10  $\mu$ L MOPS buffer (100 mM, 1M NaCl). In a separate vial add 6  $\mu$ L 200 mM carboxylic acid in DMSO with 6  $\mu$ L EDC/HOAt/NMM (100:20:100 mM) and 17  $\mu$ L DMSO, stir for 10 min at rt. Add this mixture to DNA solution and stir at 37°C for 1 h. Second activation of carboxylic acid was repeated again (6  $\mu$ L Fmoc AA OH and 6  $\mu$ L EDC/HOAt/NMM) and added to DNA mixture, stirred at 37°C for another 1 h.

After reaction completion, DNA was precipitated. The Fmoc group was then removed from all newly installed building blocks using the general procedure. The piperidine was evaporated, DNA precipitated, redissolved and checked via LC-MS. Results are summarized in figure S9.

Based on screening data, DMT-MM was chosen for coupling of non-dipeptide building blocks in the library due to its optimal general performance. For dipeptide coupling the DMT-MM protocol resulted in low yields, yet the EDC/HOAt protocol produced substantially better results. Hence it was chosen for use for dipeptides during library synthesis. Other protocols, mainly utilizing EDC/S-NHS produced considerably worse results than both DMT-MM and EDC/HOAt and thus were not investigated fully (data not shown).

For step 1 of library synthesis all building blocks with at least partial conversion were considered for inclusion. For step 2 only building blocks showing full conversion were considered for inclusion.

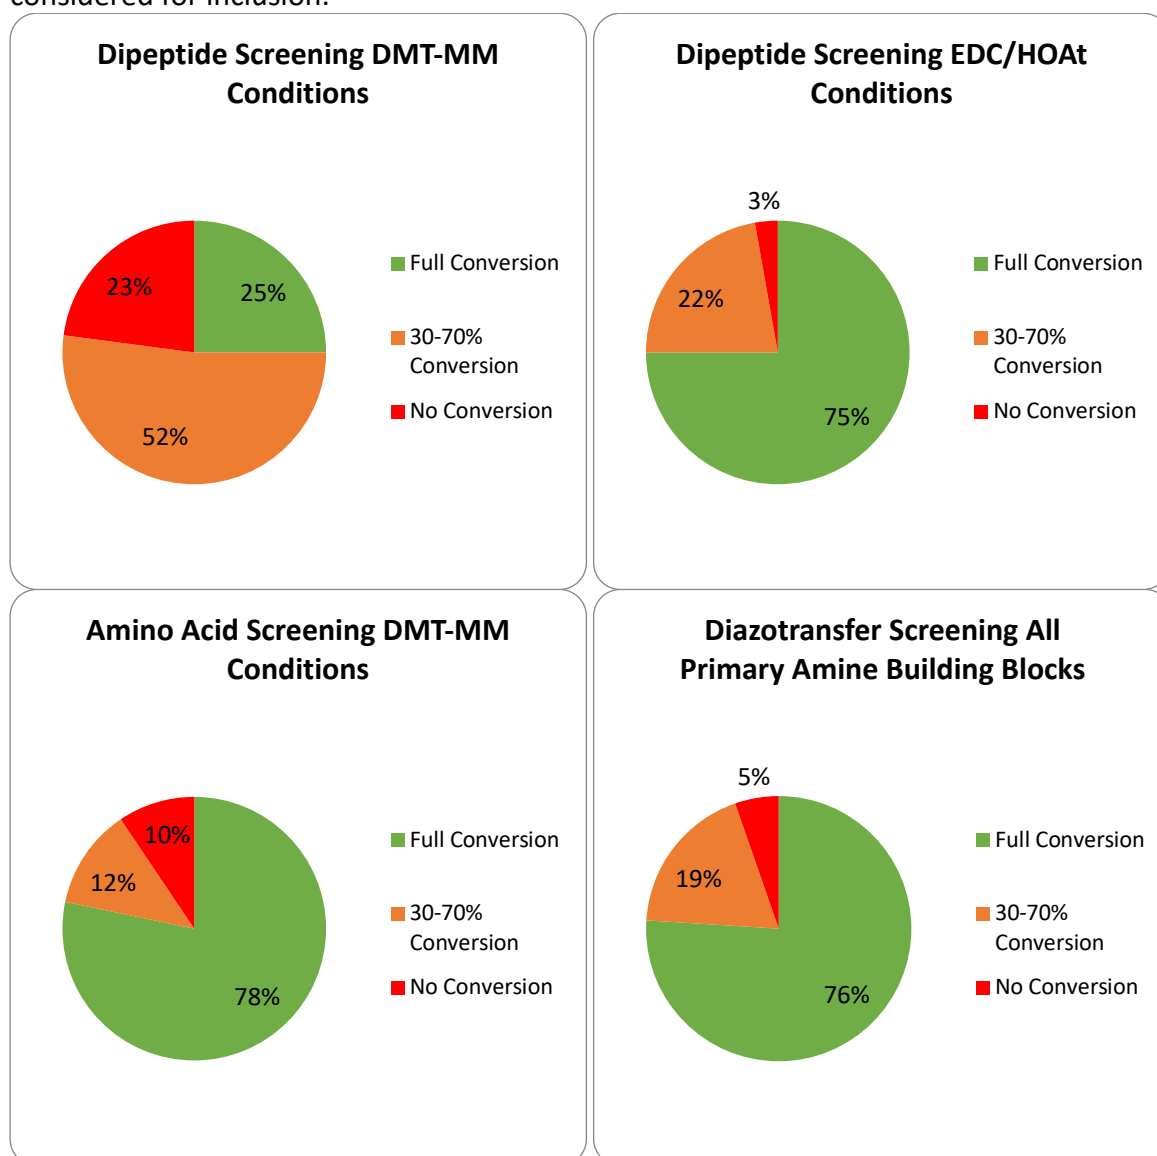

**Figure S9: Summary of Reaction Screening for amino acid and dipeptide building blocks. Amidation on top of scaffold amino group of all building blocks was tested using general conditions described in section 2.2 and diazotransfer was tested on all building blocks possessing a primary amine**

### 3.5. Dipeptide Coupling Optimization

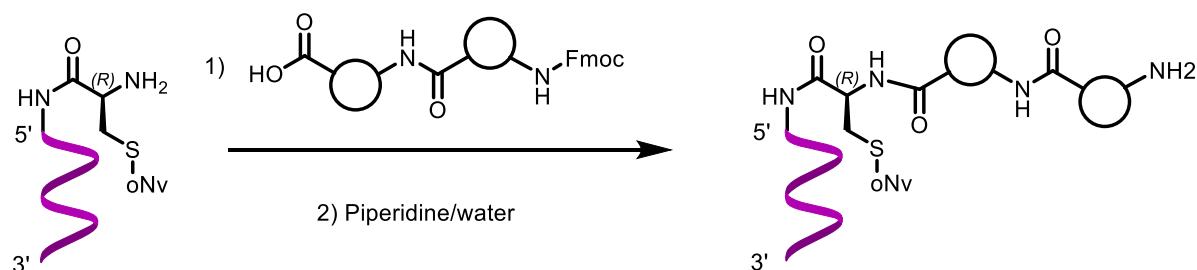

During dipeptide amidation screening, an observation was made that most dipeptide couplings result in two product peaks with identical MS signal once attached to the test DNA, contrary to single Fmoc amino acids. Purified dipeptides exhibited only single peaks after purification in HPLC, indicating lack of diastereomers. This meant that the appearance of the two peak products could be interpreted as racemization during amidation, necessitating optimization.

Reaction condition screening was performed according to section 3.4 on 0.5 nmol of scaffold-linked test DNA per test. Aim of the optimization was to decrease the appearance of two product peaks towards a single peak during LC-MS analysis, indicating reduced formation of diastereomers. Formation of secondary peaks could not be completely prevented, although was markedly decreased. During step 1 library purification, only the main peak product was isolated whenever possible.

**Table S3: Optimization of on-DNA dipeptide amidation using “test DNA” as starting material. Peak sizes are compared by integrating their UV peak at 260 nM and using the given numbers for comparison.**

| Condition | Details                                                                                           | % Main Peak Product | % Secondary Peak Product | Dipeptide                |
|-----------|---------------------------------------------------------------------------------------------------|---------------------|--------------------------|--------------------------|
| 1         | MOPS pH8 (100 mM, 1M NaCl)<br>EDC/HOAt/NMM (100:20:100 mM)<br>37 C Reaction, 10 min preactivation | 67.35               | 32.65                    | L-leucyl-L-phenylalanine |
| 2         | MOPS pH7 (100 mM, 1M NaCl)<br>EDC/HOAt/NMM (100:20:100 mM)<br>26 C Reaction, no preactivation     | 74.29               | 25.71                    | L-leucyl-L-phenylalanine |
| 3         | MOPS pH8 (100 mM, 1M NaCl)<br>EDC/HOAt/NMM (100:20:100 mM)                                        | 81.23               | 18.77                    | L-leucyl-L-phenylalanine |

|   |                                                                                               |       |       |                          |
|---|-----------------------------------------------------------------------------------------------|-------|-------|--------------------------|
|   | 26 C Reaction, no preactivation                                                               |       |       |                          |
| 4 | MOPS pH8 (200 mM, 1M NaCl)<br>EDC/HOAt/MMM (100:20:100 mM)<br>26 C Reaction, no preactivation | 82.12 | 17.88 | L-leucyl-L-phenylalanine |
| 5 | MOPS pH8 (200 mM, 3M NaCl)<br>EDC/HOAt/MMM (100:20:100 mM)<br>26 C Reaction, no preactivation | 90.05 | 9.95  | L-leucyl-L-phenylalanine |

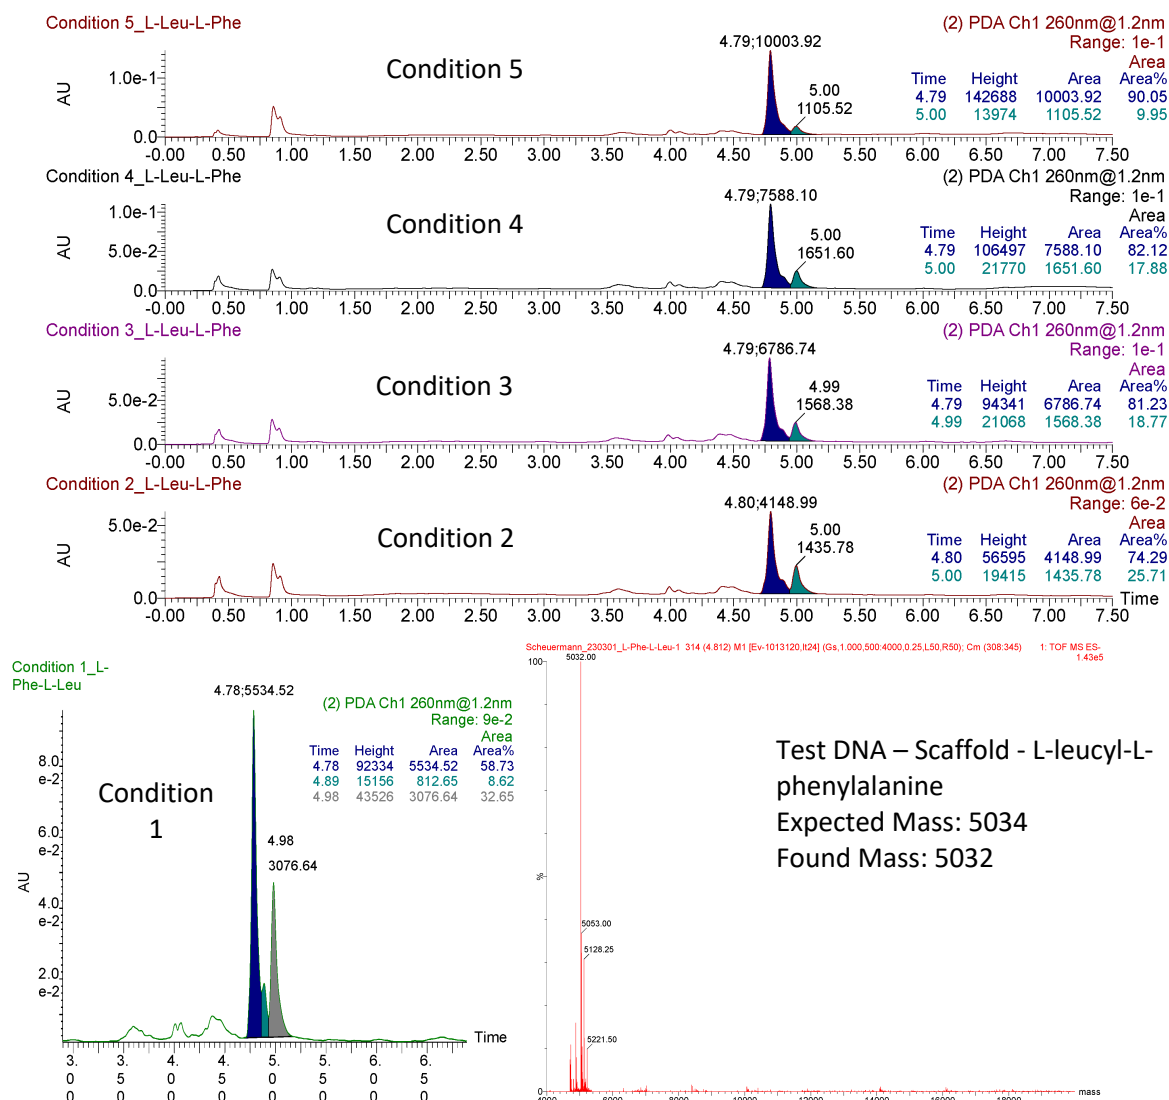

Figure S10: UV 260 nm chromatogram and MS characterization of dipeptide amidation using conditions in table S3. Product peaks are integrated and used for analysis

**Table S4: Comparison of unoptimized amidation procedure 1 vs optimized procedure 5 for dipeptide amidation on DNA. Peak sizes are compared by integrating their UV peak at 260 nM and using the given numbers for comparison.**

| Condition | Dipeptide                                  | % Main Peak Product | % Secondary Peak Product |
|-----------|--------------------------------------------|---------------------|--------------------------|
| 1         | L-seryl-L-tryptophan                       | 56.26               | 42.96                    |
| 5         | L-seryl-L-tryptophan                       | 76.83               | 23.17                    |
| 1         | L-glutaminy-L-phenylalanine                | 69.06               | 30.26                    |
| 5         | L-glutaminy-L-phenylalanine                | 81.21               | 18.79                    |
| 1         | ((S)-2-amino-5-ureidopentanoyl)-L-tyrosine | 59.8                | 39.15                    |
| 5         | ((S)-2-amino-5-ureidopentanoyl)-L-tyrosine | 73.85               | 17.55                    |

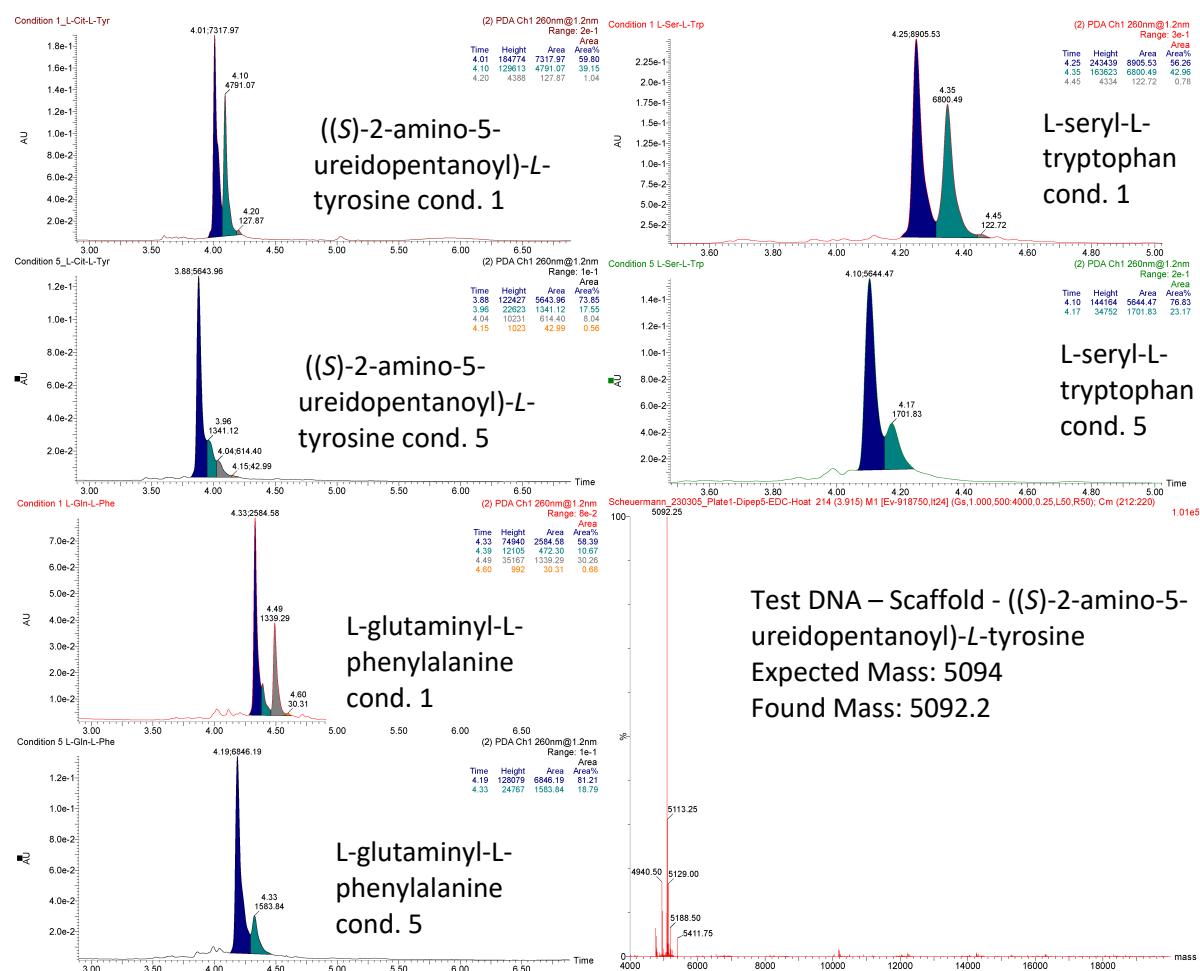

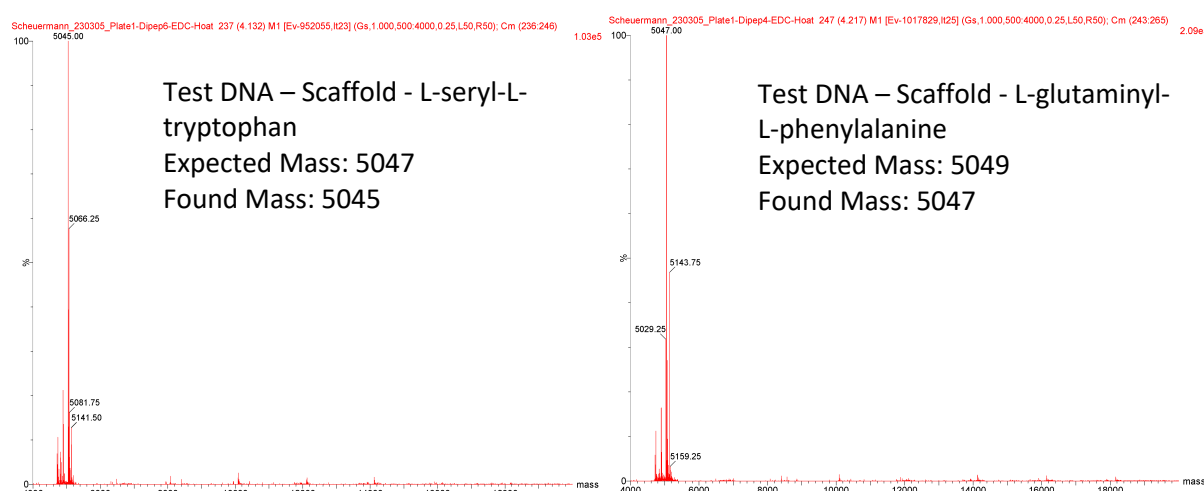

**Figure S11: UV 260 nm chromatogram and MS characterization of dipeptide amidation using conditions in table S3 and results summarized in table S4. Product peaks are integrated and used for analysis**

### 3.6. Model Compound Synthesis

Model Compounds were synthesized by consecutive reactions according to general methods listed in section 2.2. 50 nmol was taken as starting material for each 3' NH<sub>2</sub> HP3 and 5' NH<sub>2</sub> HP5 strand respectively. Fmoc deprotections were quenched by evaporating the deprotection solution via speed vacuum, followed by DNA precipitation. Upon completion of the respective HP5/HP3 model compound synthesis, each strand was individually purified via HPLC and precipitated. Yields after HPLC-purification ranged between 2-5 nmol for each strand. Both strands were then mixed equimolarly to participate in an interstrand click reaction. The click reaction product was confirmed via LC-MS and purified with HPLC again to remove copper and other impurities. The covalently linked strands were then placed in UV chamber to participate in scaffold deprotection and thioether formation using 1,3-bis(bromomethyl)benzene as a prototypical bis-electrophile. Formation of disulfide after scaffold deprotection could be inferred indirectly by attempting thioether formation without addition of TCEP or other reductant, in which case no reaction could be observed.

#### Model Compound 1:

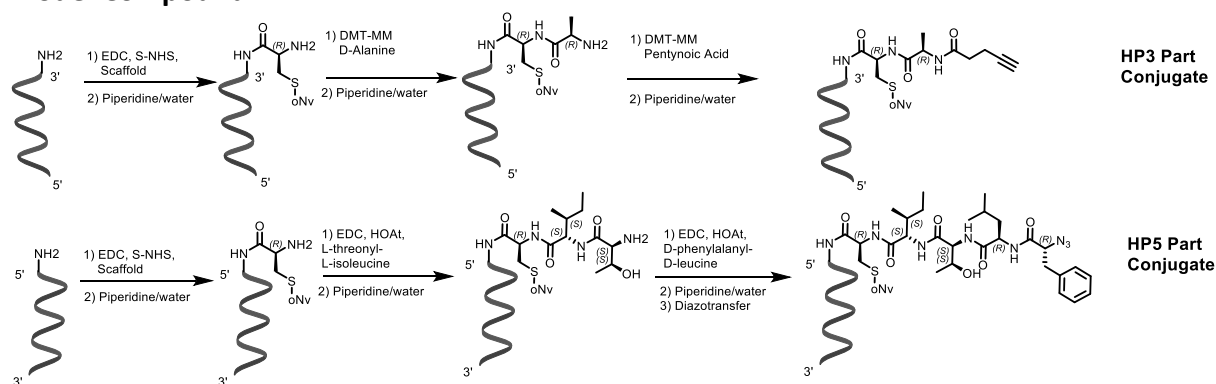

**Figure S12: Synthetic scheme for the synthesis of model compound 1 through the combination of HP5 & HP3 strands**

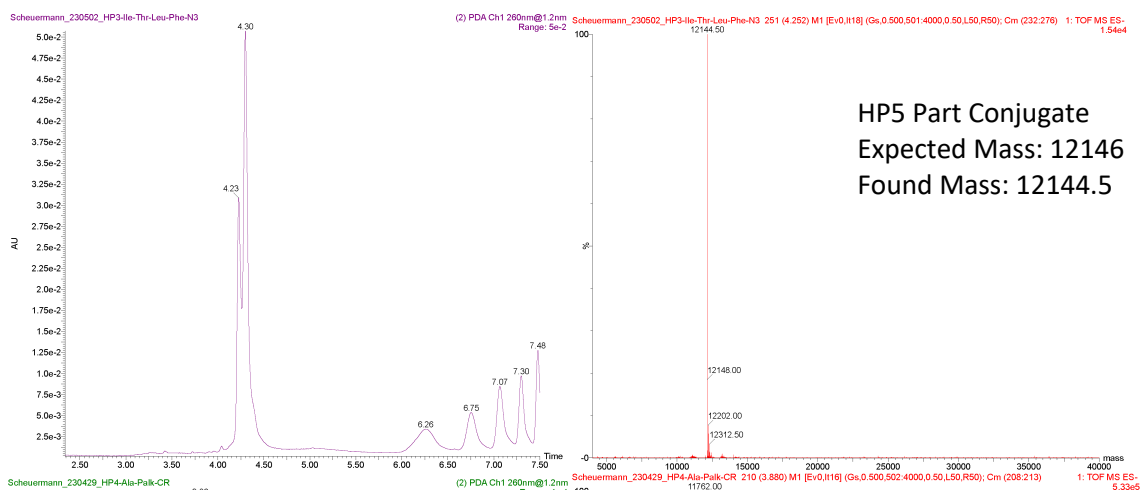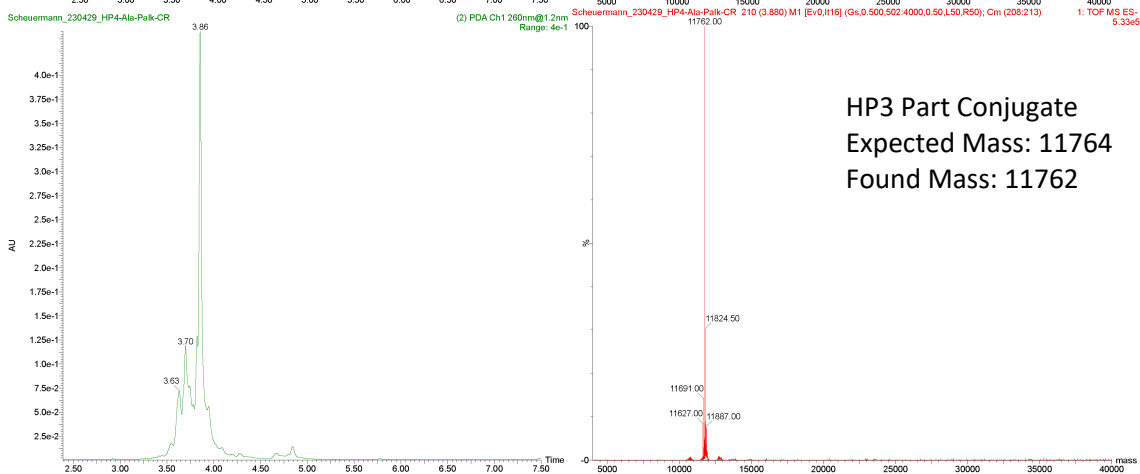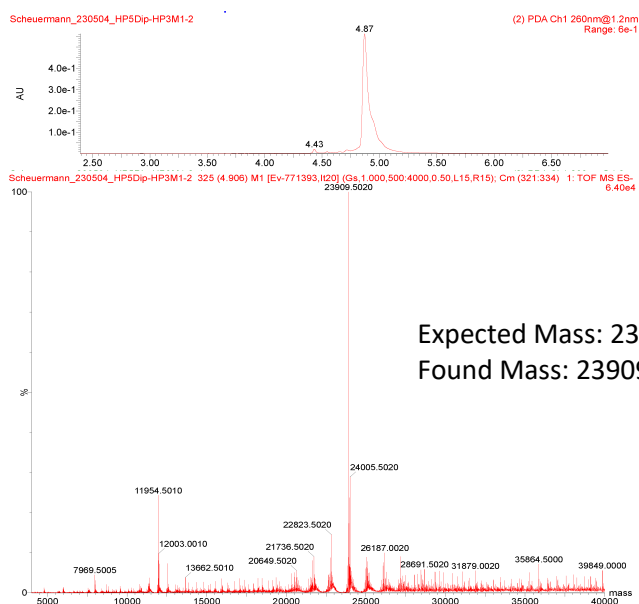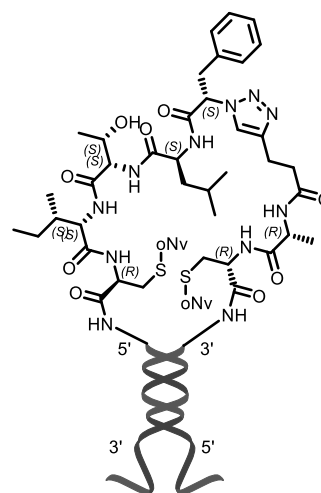

“clicked”

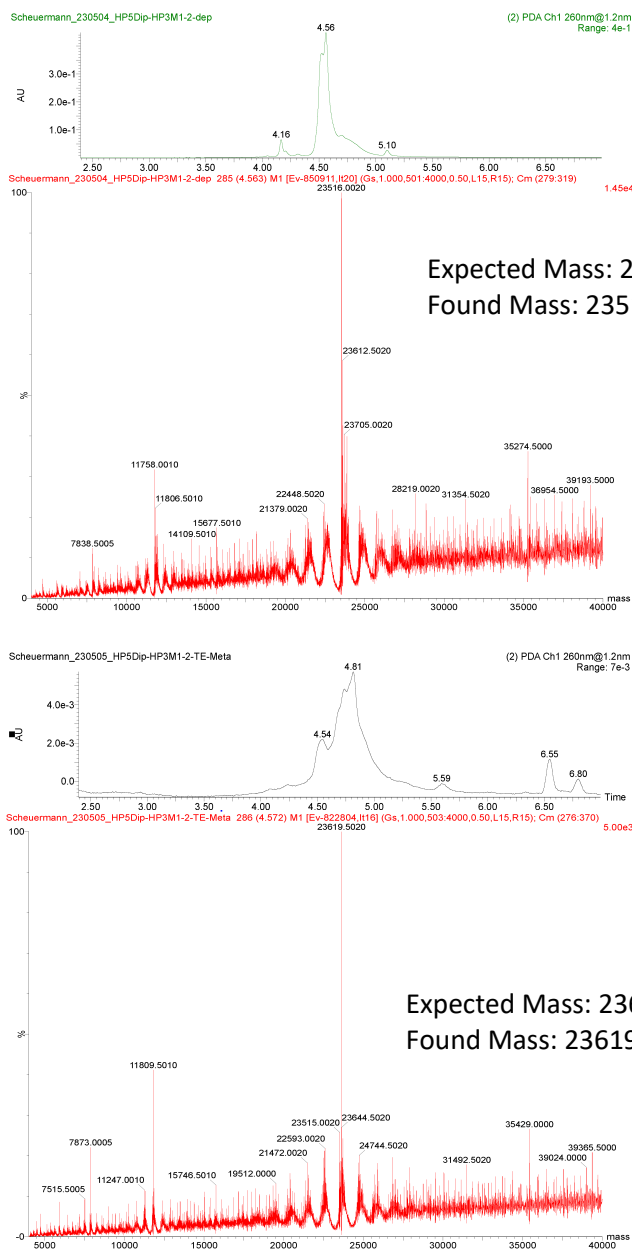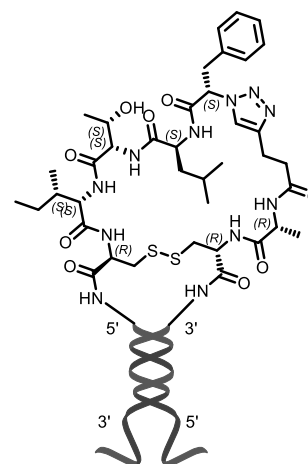

**“clicked”  
+ scaffold deprotected**

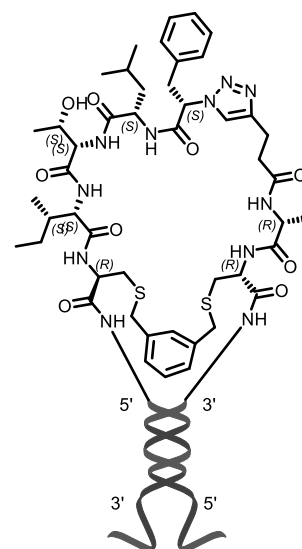

**“clicked”  
+ Meta Benzene Thioether**

**Figure S13: UV 260 nm chromatogram and MS characterization of the synthesis of Model Compound 1  
Model Compound 2:**

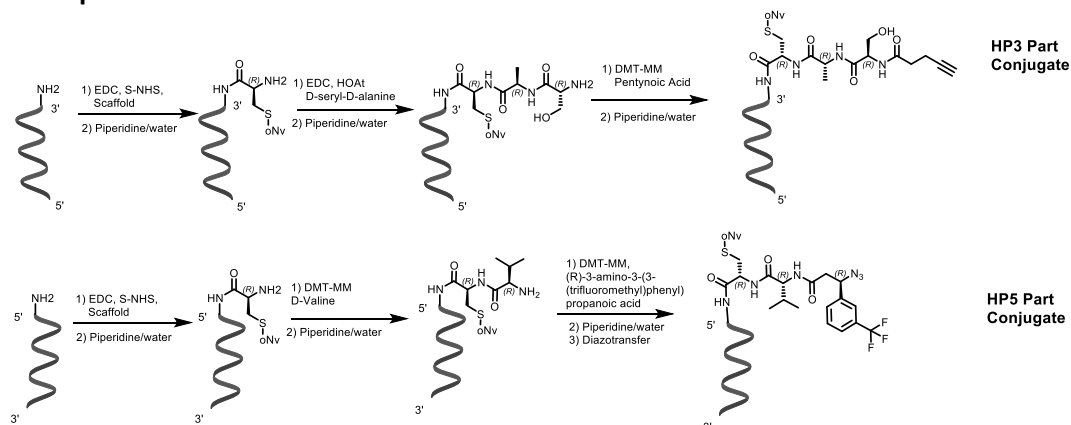

**Figure S14: Synthetic scheme for the synthesis of model compound 2 through the combination of HP5 & HP3 strands**

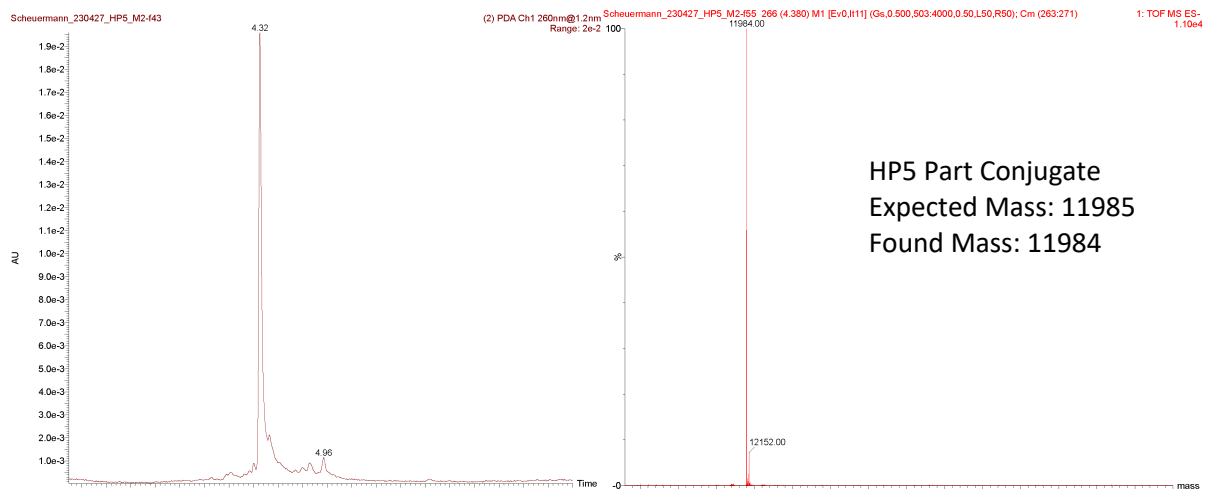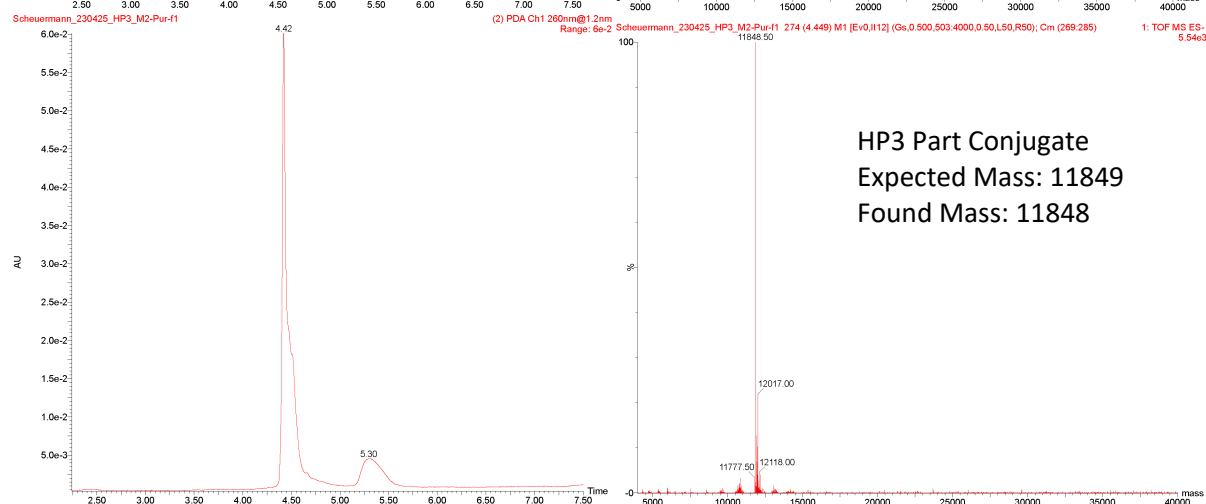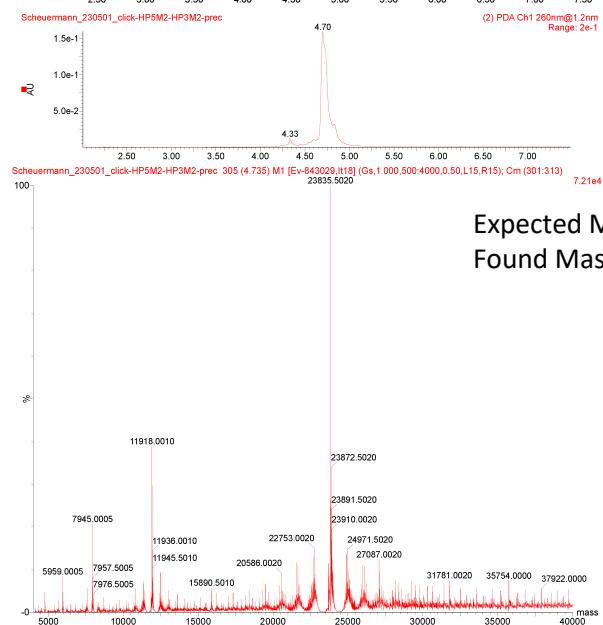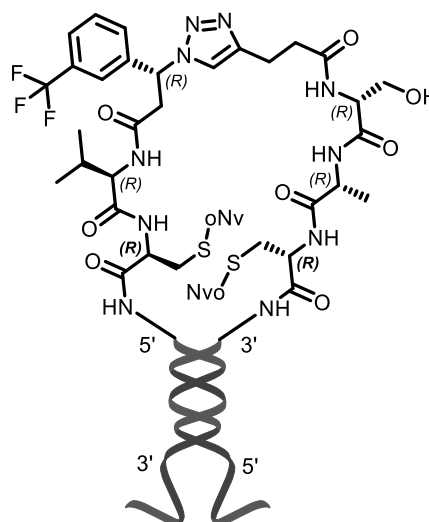

“clicked”

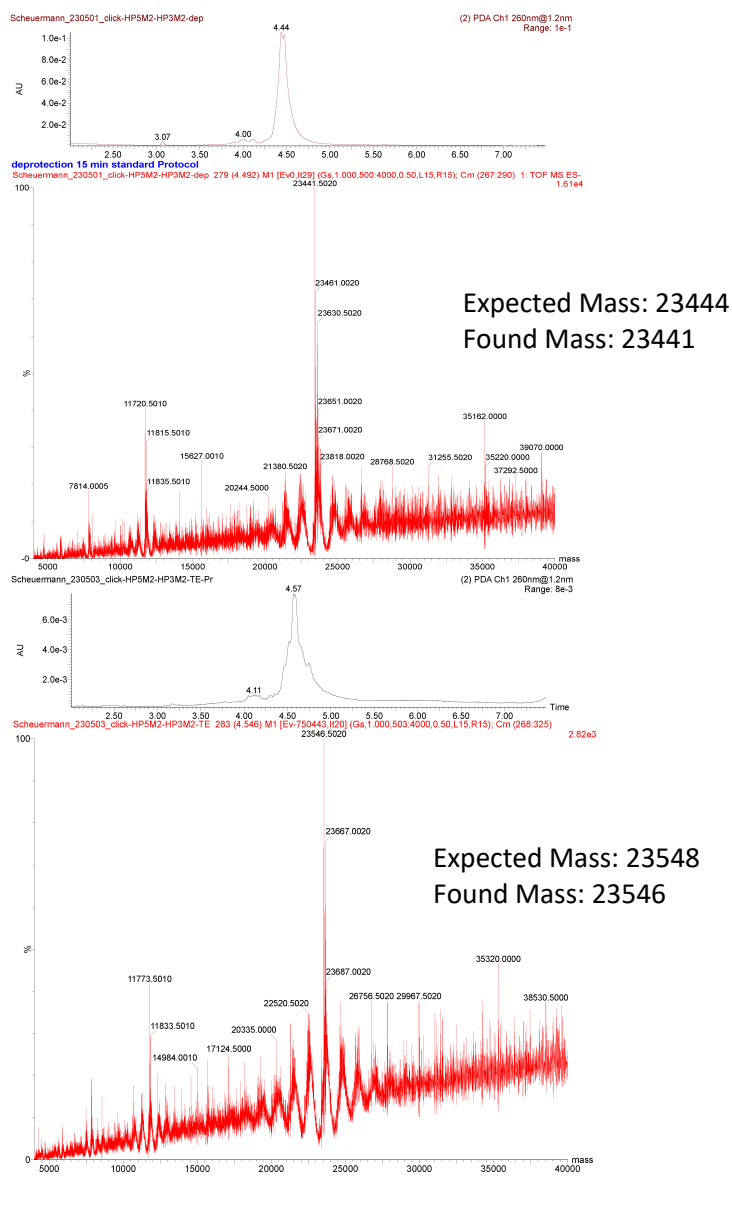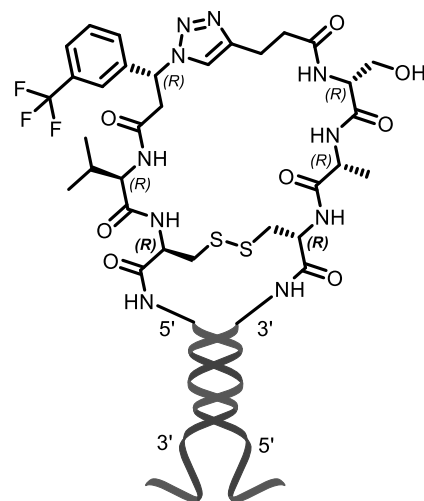

“clicked”  
+ scaffold deprotected

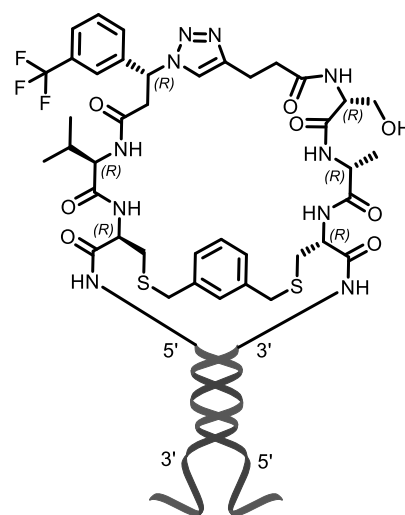

“clicked”  
+ Meta Benzene Thioether

**Figure S 15: UV 260 nm chromatogram and MS characterization of the synthesis of Model Compound 2  
Model Compound 3:**

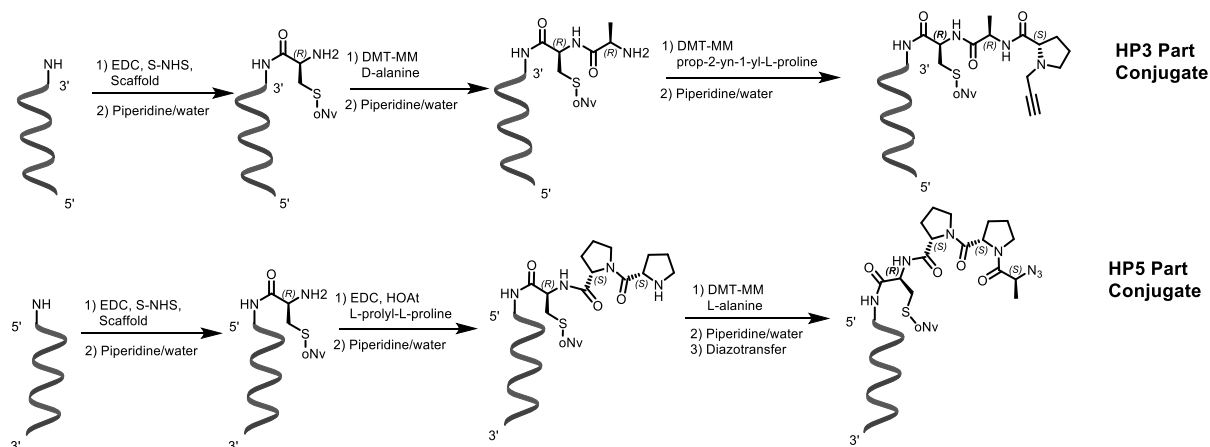

**Figure S16: Synthetic scheme for the synthesis of model compound 3 through the combination of HP5 & HP3 strands**

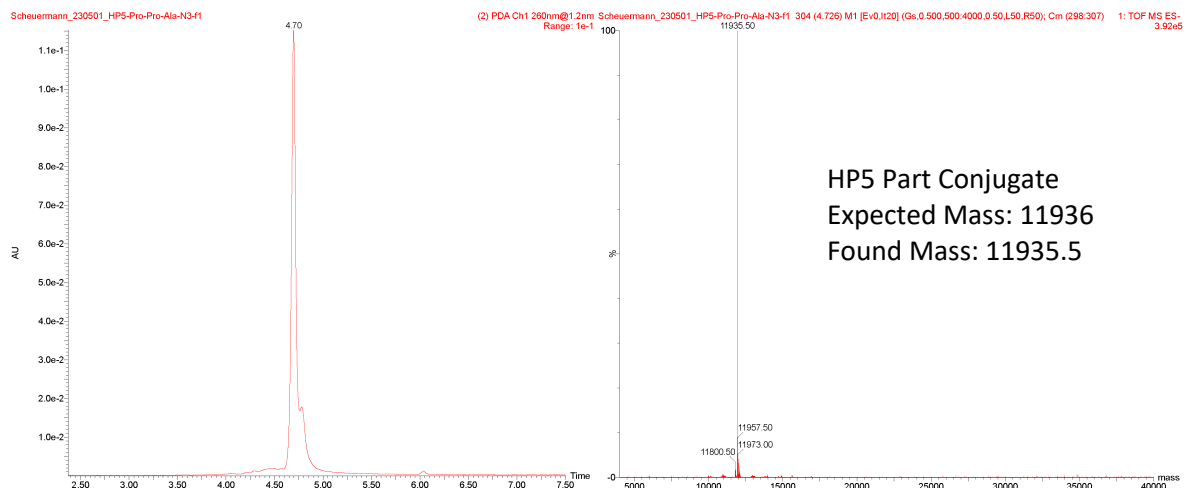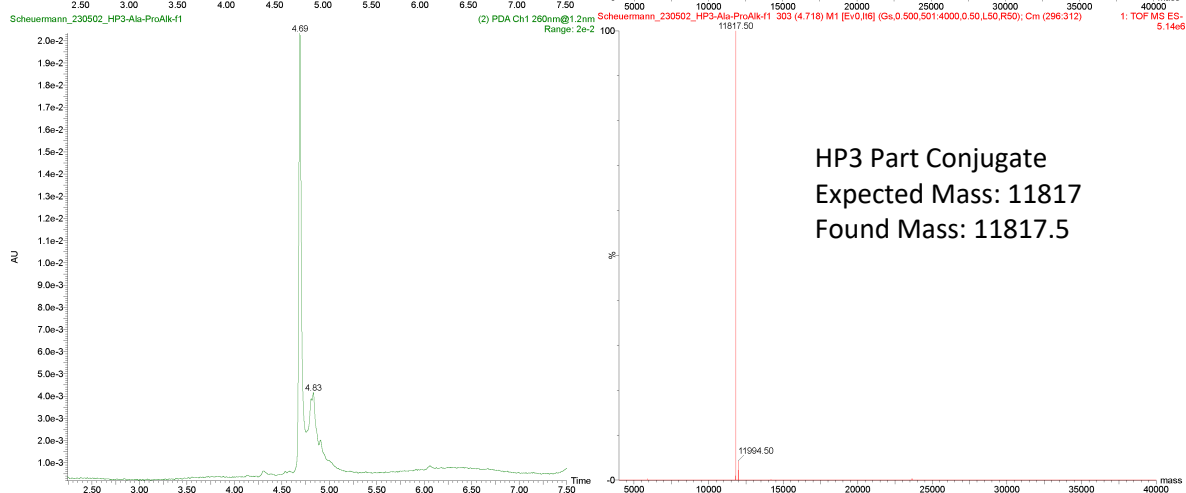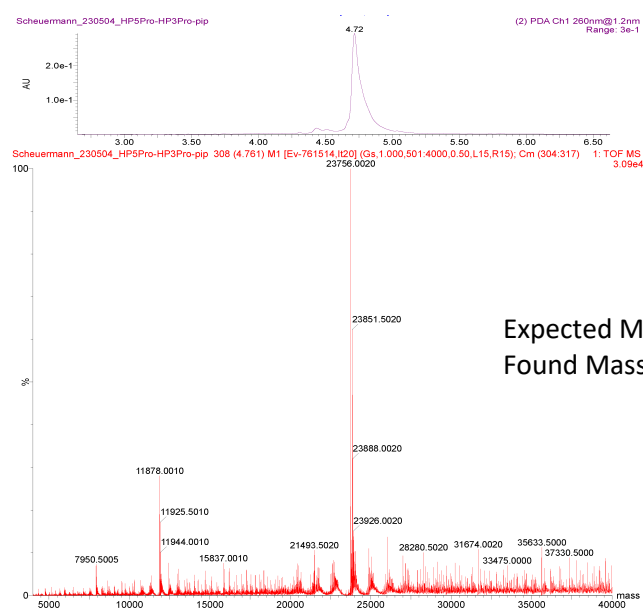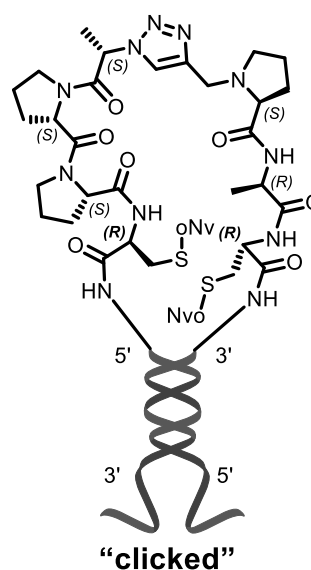

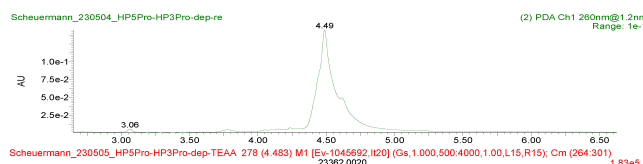

Scheuermann\_230505\_HP5Pro-HP3Pro-dep-TEAA 278 (4.483) M1 [Ei-1045692.1120] (Gs,1.000,500:4000,1.00,L15,R15), Cm (264.301) 1.83e5

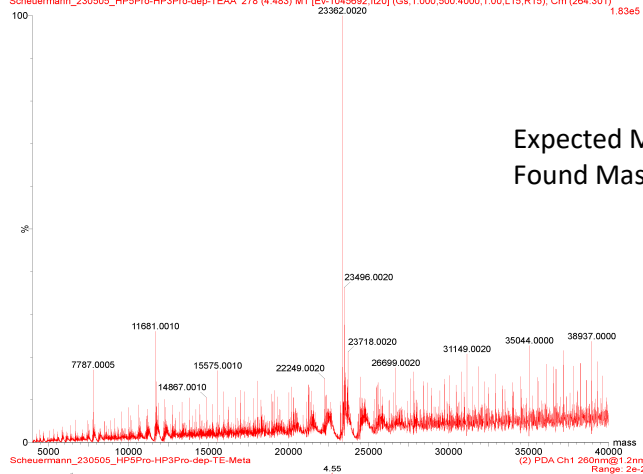

Expected Mass: 23363  
Found Mass: 23362

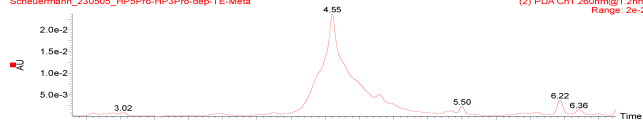

Scheuermann\_230505\_HP5Pro-HP3Pro-dep-TE-Meta 287 (4.581) M1 [Ei-846138.1120] (Gs,1.000,502:4000,1.00,L15,R15), Cm (281.328) 4.65e4

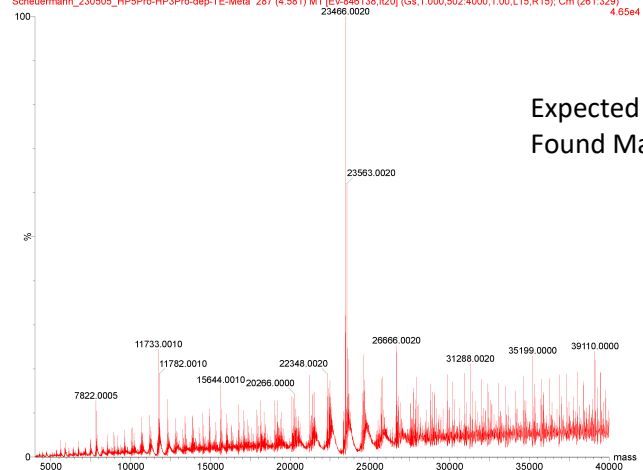

Expected Mass: 23467  
Found Mass: 23466

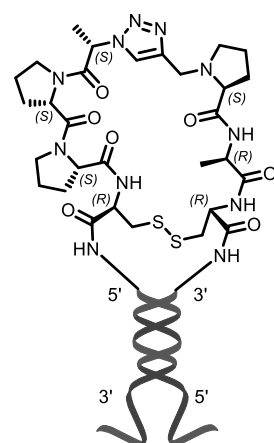

“clicked”  
+ scaffold deprotected

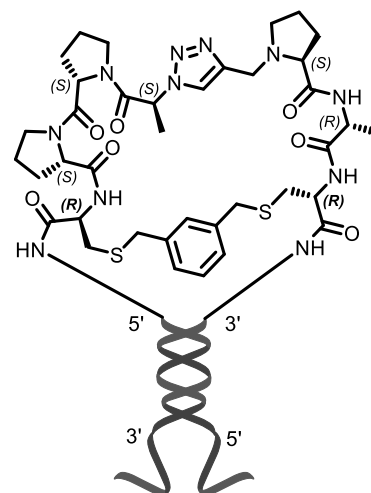

“clicked”  
+ Meta Benzene Thioether

Figure S17: UV 260 nm chromatogram and MS characterization of the synthesis of Model Compound 3

## 4. Library Synthesis

### 4.1. Library Architecture

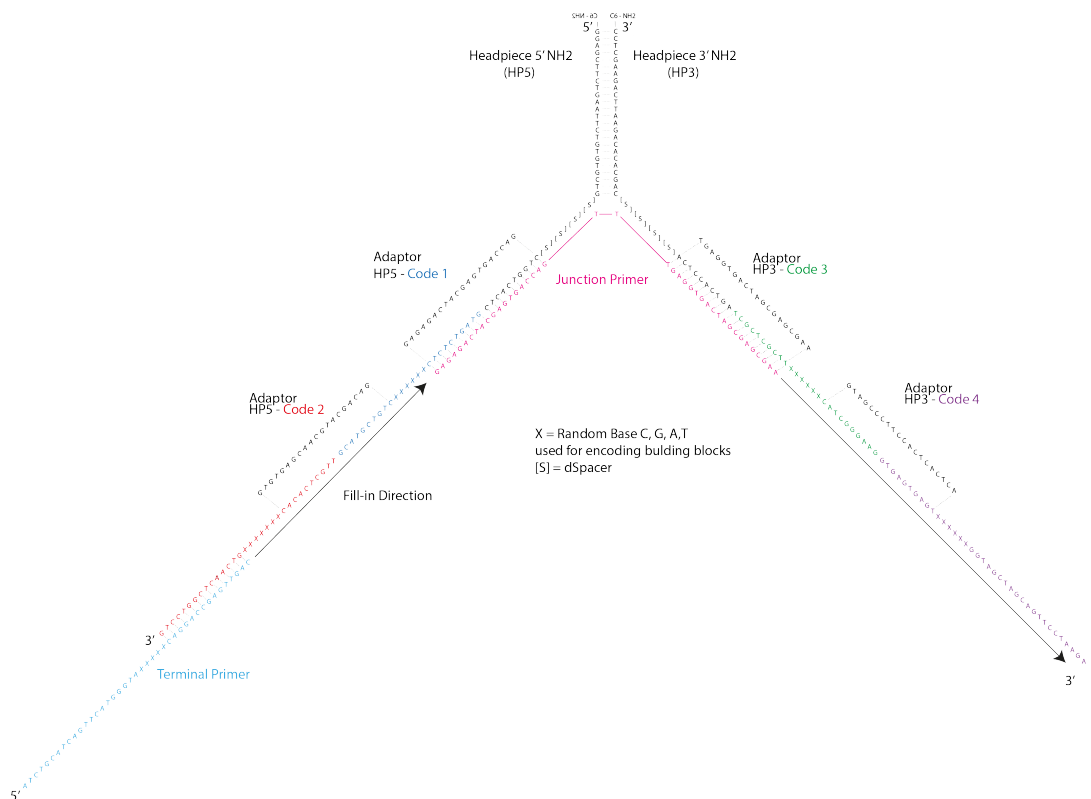

**Figure S18: Library Architecture prior to post-selection amplification**

**Table S5: Sequences of oligonucleotides used for DP-DEL creation. X position denotes variable base used for library encoding of specific members.**

| Sequence Name              | Sequence                                                                                  | Mass (Da) |
|----------------------------|-------------------------------------------------------------------------------------------|-----------|
| Headpiece 5' NH2 (HP5)     | 5' NH2-C6-GGAGCTTCTGAATTCTGTGTGCTG[dSpacer][dSpacer][dSpacer][dSpacer]CTGGTCACTC 3'       | 11346     |
| Headpiece 3' NH2 (HP3)     | 5' Phos-AGTCACCTCA[dSpacer][dSpacer][dSpacer][dSpacer]CAGCACACAGAATTCA GAAGCTCC-C6-NH2 3' | 11313     |
| Code 1 HP5 (BB1 code)      | 5' Phos-GTAGTCTCTC XXXXXX CTGTCGTACG 3'                                                   |           |
| Code 3 HP3 (BB3 code)      | 5'Phos-GAAGGGCTAC XXXXXX TTCGCTCGCT 3'                                                    |           |
| Code 2 HP5 (BB2 code)      | 5'Phos-TTGCTCACAC XXXXXX GTCAACTCGGTCCTG 3'                                               |           |
| Code 4 HP3 (BB4 code)      | 5'-AGAATCCTTGACGATCGATGG XXXXXX TGAGTGAGTG-3'                                             |           |
| HP5 Code 1 Adaptor         | 5' GAGAGACTACGAGTGACCAG 3'                                                                | 6200      |
| HP3 Code 3 Adaptor         | 5' TGAGGTGACTAGCGAGCGAA 3'                                                                | 6231      |
| HP5 Code 2 Adaptor         | 5' GTGTGAGCAACGTACGACAG 3'                                                                | 6191      |
| HP3 Code 4 Adaptor         | 5' GTAGCCCTTCCACTCACTCA 3'                                                                | 5972      |
| Terminal Primer (BB5 code) | 5' ATTCGCATCAGTTCATGGGTA XXXXX CAGGACCGAGTTGAC 3'                                         |           |
| Junction Primer            | 5' Phos-GAGAGACTACGAGTGACCAGTTTGAGGTGACTAGCGAGCGAA 3'                                     | 13180     |

## 4.2. Scaffold Coupling

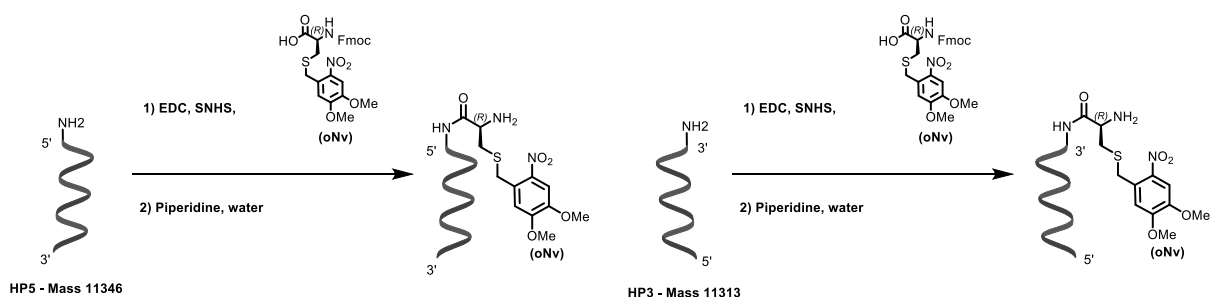

17.5  $\mu\text{mol}$  of each respective headpiece HP5 and HP3 was taken as starting material and reacted with the cysteine scaffold according to outlined protocol in section 2.2. 17 reaction batches of 1  $\mu\text{mol}$  and 1 batch of 0.5  $\mu\text{mol}$  were performed for each headpiece. The resulting crude product was Fmoc deprotected on a per-batch basis, the piperidine was evaporated via speed vacuum and the resultant DNA was redissolved and precipitated. The precipitated DNA pellets were dissolved in mQ and the batch products were joined together. Scaffold attachment for HP5 afforded 16.5  $\mu\text{mol}$  (94%) yield and for HP3 afforded 16.062  $\mu\text{mol}$  (91%) yield. The product for both headpieces was deemed of sufficient quality and used for step 1 library synthesis without further purification.

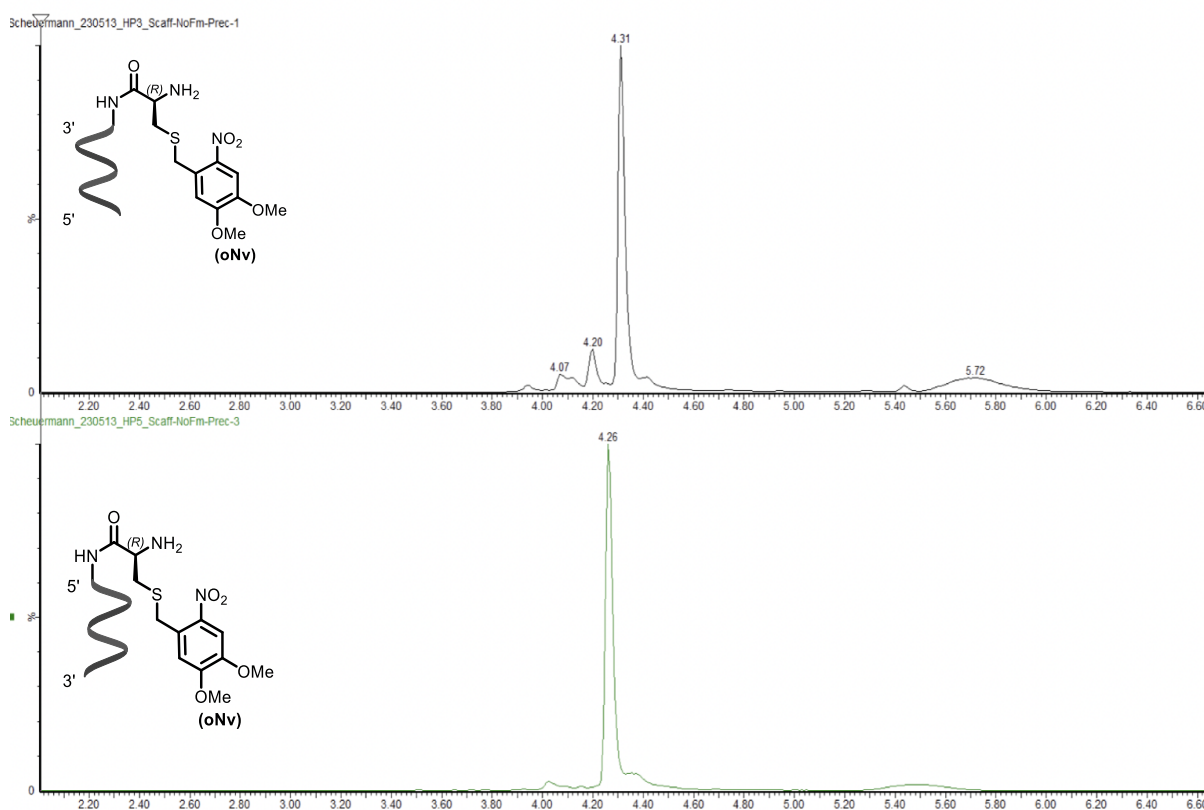

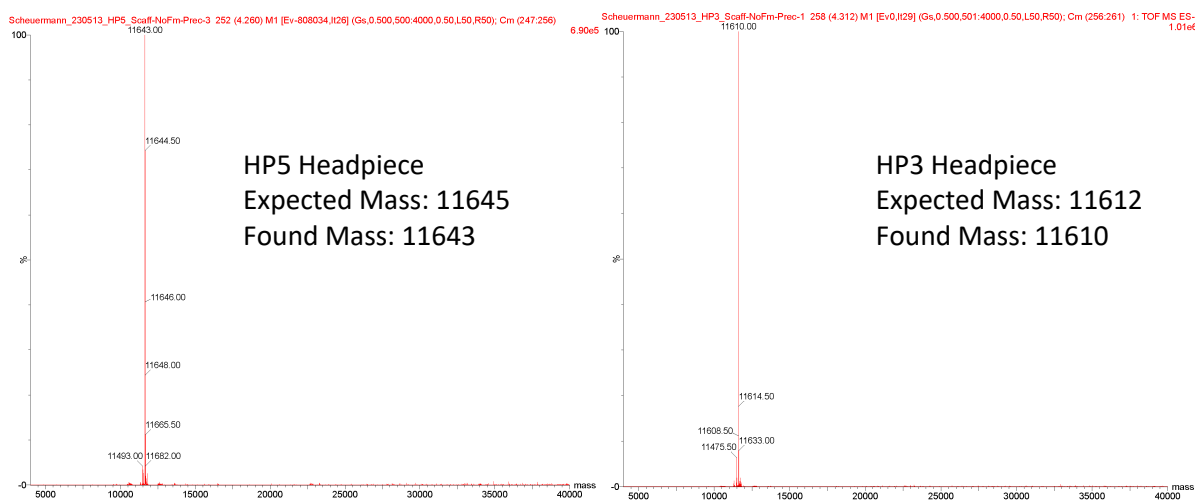

**Figure S19: UV 260 nm and MS characterizations of conjugating cysteine scaffold onto HP5 and HP3 library strands**

### 4.3. Step 1 Headpiece 5' (HP5) Sublibrary

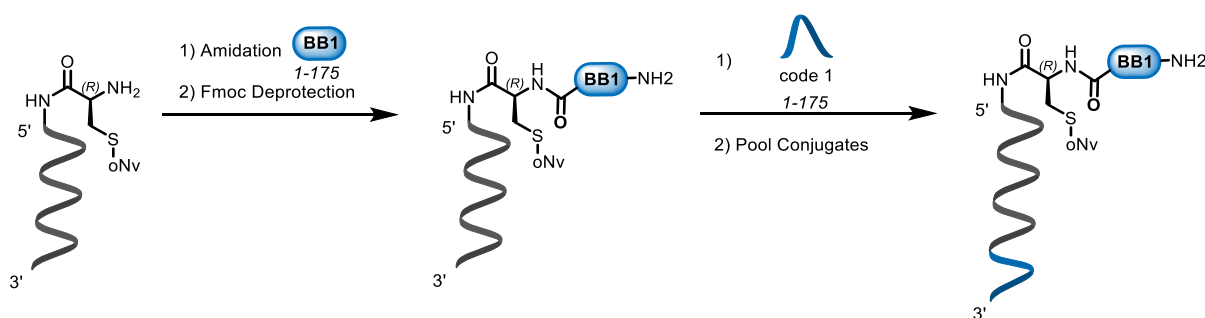

Scaffold modified HP5 DNA was split in 60 nmol portions in 2 mL Eppendorf tubes. 175 amidation reactions were then individually performed for the attachment of all BB1 building blocks. Dipeptide amidations were performed according the optimized EDC/HOAt protocol in section 2.2 and the rest of the amidations were performed using the DMT-MM protocol in the same section. The reaction products were then redissolved and individually Fmoc deprotected. The deprotection was quenched with sodium acetate buffer, followed by the addition of ethanol to precipitate the DNA product. All 175 reaction products were then individually HPLC-purified, precipitated and their yield was measured. 29 nmol for each HPLC-purified conjugate was taken for encoding step.

Each conjugate was individually encoded using code 1 strands according to procedure in section 2.2. After confirmation of ligation completion via LC-MS all 175 encoded conjugates were pooled and precipitated. The conjugate pool was then purified via HPLC at 60 °C, which enabled separation from excess codes and adaptor left over from the encoding step. The purified pool was precipitated again and analyzed. This afforded a final step 1 HP5 pool of 4400 nmol.

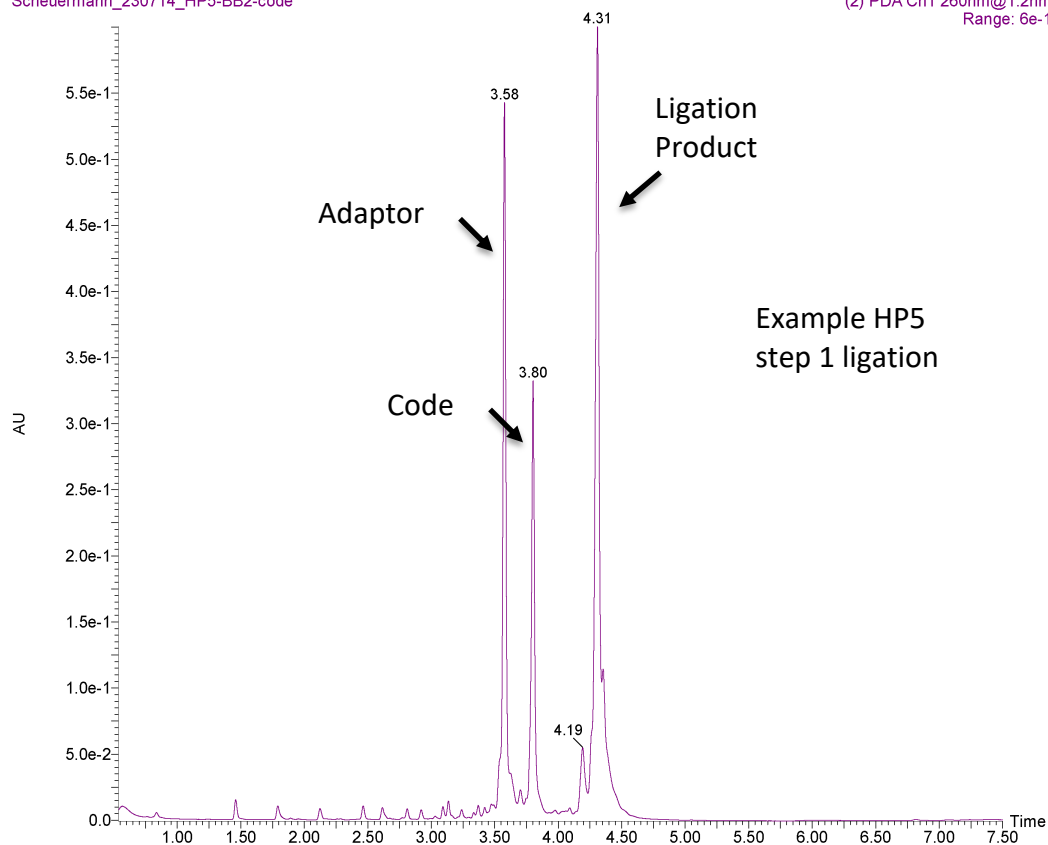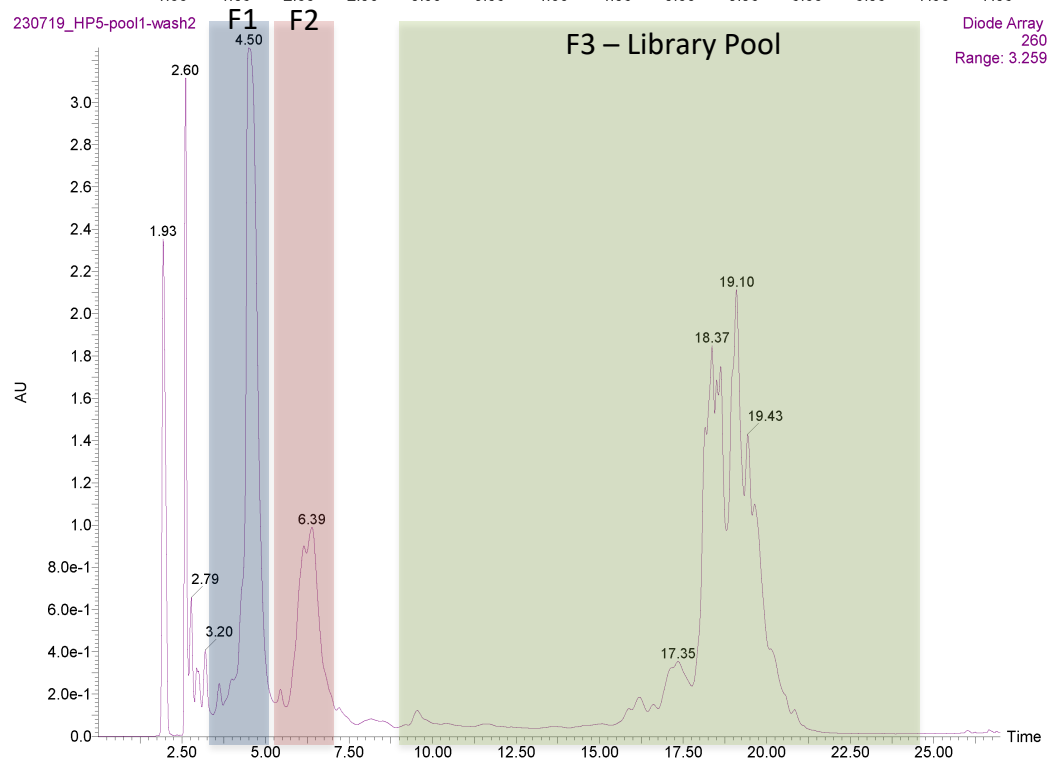

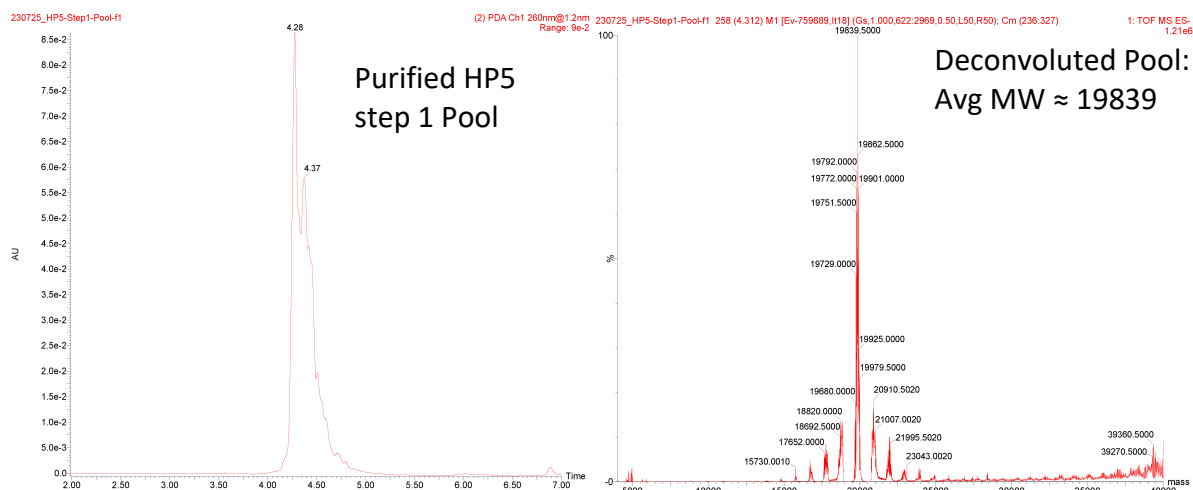

**Figure S20: Characterization of HP5 step 1 library synthesis. Top: Example ligation of code 1 onto building block 2 HP5 conjugate. Middle: HPLC purification of library pool after finished ligation. Bottom: UV chromatogram of purified step 1 HP5 pool and MS deconvolution giving an average mass**

**Table S6: List building blocks 1 and oligonucleotide codons encoding them in the code 1 position**

| BB # | SMILES                                            | Code (5'-3') |
|------|---------------------------------------------------|--------------|
| 1    | <chem>C[C@@H](C(=O)O)N</chem>                     | TGGTGT       |
| 2    | <chem>C[C@H](C(=O)O)N</chem>                      | CCTTGA       |
| 3    | <chem>C([C@@H](C(=O)O)N)O</chem>                  | ACGAGT       |
| 4    | <chem>C([C@H](C(=O)O)N)O</chem>                   | AGTCA        |
| 5    | <chem>C[C@H]([C@@H](C(=O)O)N)O</chem>             | CTTGGA       |
| 6    | <chem>C[C@@H]([C@H](C(=O)O)N)O</chem>             | CTCTCT       |
| 7    | <chem>CC(C)[C@@H](C(=O)O)N</chem>                 | TATAGA       |
| 8    | <chem>CC(C)[C@H](C(=O)O)N</chem>                  | GTATAA       |
| 9    | <chem>CC(C)[C@@H](C(=O)O)N</chem>                 | CATAAC       |
| 10   | <chem>CC(C)[C@H](C(=O)O)N</chem>                  | CATATG       |
| 11   | <chem>C1=CC=C(C=C1)[C@@H](C(=O)O)N</chem>         | TGCGCC       |
| 12   | <chem>C1=CC=C(C=C1)[C@H](C(=O)O)N</chem>          | TATGAA       |
| 13   | <chem>C1=CC=CC=C1[C@@H](C(=O)O)N</chem>           | AGGCTC       |
| 14   | <chem>C1=CC=CC=C1[C@H](C(=O)O)N</chem>            | GTCACG       |
| 15   | <chem>C1=CC=C2C(=C1)C(=CN2)[C@@H](C(=O)O)N</chem> | CGATTG       |
| 16   | <chem>C1=CC=C2C(=C1)C(=CN2)[C@H](C(=O)O)N</chem>  | TGAATC       |
| 17   | <chem>CC[C@H](C)[C@@H](C(=O)O)N</chem>            | CCAGTT       |
| 18   | <chem>CC[C@@H](C)[C@H](C(=O)O)N</chem>            | AGCTGT       |
| 19   | NULL                                              | TAGCGA       |
| 20   | <chem>C(C(=O)O)N</chem>                           | GTTATT       |
| 21   | <chem>C([C@@H](C(=O)O)N)C(=O)O</chem>             | GTACGT       |
| 22   | <chem>C([C@H](C(=O)O)N)C(=O)O</chem>              | TGCACG       |
| 23   | <chem>C1CCC(CC1)[C@@H](C(=O)O)N</chem>            | GTGCTA       |
| 24   | <chem>C1CCC(CC1)[C@H](C(=O)O)N</chem>             | TCGCGC       |
| 25   | <chem>C1CC(C1)[C@@H](C(=O)O)N</chem>              | TTACTT       |
| 26   | <chem>O=C(O)[C@@H](N)CC1CCCCC1</chem>             | GTCTGC       |
| 27   | <chem>O=C(O)[C@H](N)CC1CCCCC1</chem>              | CTGGTC       |
| 28   | <chem>C1CC1[C@@H](C(=O)O)N</chem>                 | CGTTAA       |
| 29   | <chem>CC(C)(C)[C@H](N)C(=O)O</chem>               | TTGCAC       |
| 30   | <chem>O=C(O)[C@@H](N)CC1=CSC=N1</chem>            | ACTGCG       |
| 31   | <chem>O=C(O)[C@H](N)CC1=CSC=N1</chem>             | GTCAGT       |
| 32   | <chem>N[C@@H](CCCNC(N)=O)C(=O)O</chem>            | TCTATC       |
| 33   | <chem>N[C@H](CCCNC(N)=O)C(=O)O</chem>             | AGAACT       |
| 34   | <chem>O=C(C(S1)=CC2=C1CNC2)O</chem>               | ACGTCT       |
| 35   | <chem>N[C@@H](CCCNC(N(C)C)=N)C(=O)O</chem>        | TTAGCG       |
| 36   | <chem>C1=COC(=C1)[C@@H](C(=O)O)N</chem>           | ACACAG       |
| 37   | <chem>CCCC[C@@H](C(=O)O)N</chem>                  | AGTCGA       |
| 38   | <chem>CCCC[C@H](C(=O)O)N</chem>                   | GACAGC       |
| 39   | <chem>C1CCC(CC1)CC[C@@H](C(=O)O)N</chem>          | CCACCG       |
| 40   | <chem>O=C(O)C(N)CC1=CC(NC2=C1C=CC=C2)=O</chem>    | GCCGCT       |
| 41   | <chem>CC1=CC(=NO1)NC(=O)CSCC(C(=O)O)N</chem>      | GACATA       |
| 42   | <chem>CC(=O)NCCCC[C@@H](C(=O)O)N</chem>           | CATCTT       |
| 43   | <chem>CC(C)(C)C1=CC=C(C=C1)[C@@H](C(=O)O)N</chem> | TCCATT       |

|     |                                                                |         |
|-----|----------------------------------------------------------------|---------|
| 44  | <chem>CC(C)(C)C1=CC=C(C=C1)C[C@H](C(=O)O)N</chem>              | TAGACT  |
| 45  | <chem>C1=CC(=CC(=C1)Cl)CC(C(=O)O)N</chem>                      | ATCTGC  |
| 46  | <chem>C1=CC(=CC=C1C[C@@H](C(=O)O)N)Cl</chem>                   | TATTAC  |
| 47  | <chem>C1=CC(=CC=C1C[C@H](C(=O)O)N)Cl</chem>                    | GCGGAT  |
| 48  | <chem>C1=CC=C(C(=C1)C[C@@H](C(=O)O)N)Cl</chem>                 | AAGTAC  |
| 49  | <chem>O=C(O)[C@@H](N)CC1=CC=C(Cl)C(Cl)=C1</chem>               | CGGCTA  |
| 50  | <chem>C1=CC=C(C=C1)[C@@H](C(=O)O)N</chem>                      | ATCCAC  |
| 51  | <chem>C1=CC(=CC(=C1)Cl)[C@@H](C(=O)O)N</chem>                  | AAGCAA  |
| 52  | <chem>C1=CC(=CC=C1C[C@H](C(=O)O)N)[N+](=O)[O-]</chem>          | TTGGTG  |
| 53  | <chem>C1=CC(=CC=C1C[C@@H](C(=O)O)N)C(=O)N</chem>               | GTAAGA  |
| 54  | <chem>COC1=CC=C(C=C1)C[C@H](C(=O)O)N</chem>                    | AATCTG  |
| 55  | <chem>C1=CC=C2C(=C1)C=CC=C2C[C@@H](C(=O)O)N</chem>             | CAATAA  |
| 56  | <chem>C1=CC=C(C=C1)C(=O)C2=CC=C(C=C2)C[C@@H](C(=O)O)N</chem>   | GTATGC  |
| 57  | <chem>C(C1=C(C(=C(C(=C1)F)F)F)F)[C@@H](C(=O)O)N</chem>         | GCTACT  |
| 58  | <chem>O=C(O)[C@@H](N)C(C1=CC=CC=C1)C2=CC=CC=C2</chem>          | CTGCAA  |
| 59  | <chem>C1=CC(=CC=C1C[C@@H](C(=O)O)N)CP(=O)(O)O</chem>           | AGGTCC  |
| 60  | <chem>C1=CC(=CN=C1)C[C@@H](C(=O)O)N</chem>                     | TTATCC  |
| 61  | <chem>C1=CC(=CN=C1)C[C@H](C(=O)O)N</chem>                      | CAACTA  |
| 62  | <chem>C1=CC=C(C=C1)COC[C@H](C(=O)O)N</chem>                    | GAGCCT  |
| 63  | <chem>C1=CC(=CC=C1CC(C(=O)O)N)C#N</chem>                       | TGTACA  |
| 64  | <chem>O=C(O)[C@@H](N)C/C=C/C1=CC=CC=C1</chem>                  | AGTCAT  |
| 65  | <chem>O=C(O)[C@@H](N)CC1=CC=C(C2=CC=CC=C2)C=C1</chem>          | ACCGTA  |
| 66  | <chem>O=C(O)C(N)CC1=CC=C(OCO2)C2=C1</chem>                     | CTCAAC  |
| 67  | <chem>O=C(O)[C@@H](N)C1CC2=C(C=CC=C2)C1</chem>                 | AATGCC  |
| 68  | <chem>C1=CC=C(C(=C1)CC(C(=O)O)N)O</chem>                       | GCGTCA  |
| 69  | <chem>O=C(O)[C@@H](N)CC1=CC=C(OC2=C(Cl)C=CC=C2Cl)C=C1</chem>   | TATCAG  |
| 70  | <chem>O=C(O)[C@H](CC1=CC=CS1)N</chem>                          | TTCACA  |
| 71  | <chem>C1=C(NC=N1)C[C@@H](C(=O)O)N</chem>                       | TCTTAG  |
| 72  | <chem>C[C@@H](CC(=O)O)N</chem>                                 | CGCACT  |
| 73  | <chem>CC(C)C[C@@H](CC(=O)O)N</chem>                            | AGATGA  |
| 74  | <chem>CC(C)[C@H](CC(=O)O)N</chem>                              | GCTAAC  |
| 75  | <chem>C1=CC=C(C=C1)C[C@@H](CC(=O)O)N</chem>                    | GATGAT  |
| 76  | <chem>C(CN)C(=O)O</chem>                                       | CCAGAG  |
| 77  | <chem>C1=CC(=CC(=C1)C(F)(F)F)[C@H](CC(=O)O)N</chem>            | CTTCTC  |
| 78  | <chem>C1=CC(=CC(=C1)C(F)(F)F)[C@@H](CC(=O)O)N</chem>           | GATTGC  |
| 79  | <chem>C1=CC(=CC=C1C[C@@H](CC(=O)O)N)O</chem>                   | CGCGAC  |
| 80  | <chem>CC1=CC=C(C=C1)C[C@H](CC(=O)O)N</chem>                    | TATTGT  |
| 81  | <chem>N[C@H](CC1=CC=CC=C1Cl)CC(O)=O</chem>                     | CCACAC  |
| 82  | <chem>O=C(O)C[C@H](N)CC1=CC=C(Cl)C(Cl)=C1</chem>               | CTGCGC  |
| 83  | <chem>C1=CC(=CC=C1C[C@@H](CC(=O)O)N)Cl</chem>                  | CGTCAC  |
| 84  | <chem>N[C@H](CCC(N)=O)CC(O)=O</chem>                           | AGTGTT  |
| 85  | <chem>C1C[C@H](NC1)C(=O)O</chem>                               | CGCTAG  |
| 86  | <chem>C1C[C@@H](NC1)C(=O)O</chem>                              | TCAATG  |
| 87  | <chem>C1CNC[C@H]1C(=O)O</chem>                                 | GACTTG  |
| 88  | <chem>O=C([C@H]1NC[C@H](O)C1)O</chem>                          | AATTGA  |
| 89  | <chem>C1CCN[C@@H](C1)C(=O)O</chem>                             | AACCGA  |
| 90  | <chem>C1C[C@H](CNC1)C(=O)O</chem>                              | GTCCGC  |
| 91  | <chem>C1CNCCC1C(=O)O</chem>                                    | TGACTG  |
| 92  | <chem>C1CNC(=O)[C@@H](N1)CC(=O)O</chem>                        | CTTGAG  |
| 93  | <chem>O=C(C1=CN(C2CNCC2)N=N1)O</chem>                          | GTGAAT  |
| 94  | <chem>C1CN[C@@H]1C(=O)O</chem>                                 | TAACAA  |
| 95  | <chem>O=C([C@H]1CNC[C@@H]1C2=CC=C(Cl)C=C2)O</chem>             | GCGGTA  |
| 96  | <chem>O=C([C@H]1NCC2=C(C=CC=C2)C1)O</chem>                     | GCGTAG  |
| 97  | <chem>OC[C@H]1NCCC1=O</chem>                                   | TGGTCA  |
| 98  | <chem>O=C([C@]12CNC[C@@]1([H])CCO2)O</chem>                    | CTAGCT  |
| 99  | <chem>O=C(C1=CC=NC2=C1CNCC2)O</chem>                           | AGTAGT  |
| 100 | <chem>C1CC2(CNC2)OC1C(=O)O</chem>                              | CCTGTC  |
| 101 | <chem>C1=CC=C(C=C1)CC(C(=O)NCC(=O)O)N</chem>                   | CGTACGC |
| 102 | <chem>O=C(O)CNC([C@@H](N)CC1=CSC=N1)=O</chem>                  | CGACGA  |
| 103 | <chem>C[C@@H](C(O)=O)NC([C@@H](CC(C)C)N)=O</chem>              | TGAGAA  |
| 104 | <chem>C[C@@H](C(O)=O)NC([C@H](N)CCCC)=O</chem>                 | ATAGAT  |
| 105 | <chem>C[C@@H](C(O)=O)NC([C@@H](N)CC1=CSC=N1)=O</chem>          | CTCTTA  |
| 106 | <chem>OC[C@H](C(O)=O)NC([C@H](N)CC1CCCC1)=O</chem>             | ATGCCG  |
| 107 | <chem>C1=CC(=CC=C1C[C@@H](C(=O)N[C@@H](CO)C(=O)O)N)O</chem>    | TGATCG  |
| 108 | <chem>CC(C)[C@H](C(=O)N[C@@H](CO)C(=O)O)N</chem>               | AATGGT  |
| 109 | <chem>C[C@@H]([C@@H](C(=O)O)NC(=O)[C@@H]1CCCN1)O</chem>        | TAGTTC  |
| 110 | <chem>C[C@@H](O)[C@@H](C(O)=O)NC([C@@H]([C@@H](O)C)N)=O</chem> | CAGATA  |

|     |                                                                              |        |
|-----|------------------------------------------------------------------------------|--------|
| 111 | C[C@@H](O)[C@@H](C(O)=O)NC([C@@H](N)C1CC2=C(C=CC=C2)C1)=O                    | AGATAT |
| 112 | CC(C)C[C@@H](C(=O)O)NC(=O)[C@H](C(C)C)N                                      | CAATCT |
| 113 | CC(C)C[C@@H](C(O)=O)NC([C@H](CCCCNC(C)=O)N)=O                                | GACTAA |
| 114 | C[C@H]([C@@H](C(=O)N[C@@H](C(C)C)C(=O)O)N)O                                  | GAACAC |
| 115 | C[C@@H](C(=O)N[C@@H](C(C)C)C(=O)O)N                                          | ATGCGT |
| 116 | CC(C)[C@@H](C(O)=O)NC([C@H](N)CC#N)=O                                        | TTCGGC |
| 117 | CC(C)[C@@H](C(O)=O)NC([C@@H](N)CC(OC)=O)=O                                   | ACAGGC |
| 118 | O=C(O)CNC([C@@H](N)CC(OC)=O)=O                                               | GCGCGA |
| 119 | C1=NC(=C2C(=N1)N(C=N2)[C@H]3[C@@H]([C@@H]([C@H](O3)CSCC[C@@H](C(=O)O)N)O)O)N | TCAGAT |
| 120 | CC(C)C[C@@H](C(=O)N[C@@H](CC1=CC=CC=C1)C(=O)O)N                              | TCTGTG |
| 121 | OC1=CC=C(C=C1)C[C@@H](C(O)=O)NC([C@@H](C(C)C)N)=O                            | ATCTAG |
| 122 | OC1=CC=C(C=C1)C[C@@H](C(O)=O)NC([C@@H](N)CCNC(N)=O)=O                        | GACCTC |
| 123 | OC1=CC=C(C=C1)C[C@@H](C(O)=O)NC([C@H](N)CC2=CC=C(C)C=C2)=O                   | TGCATA |
| 124 | C1=CC=C2C(=C1)C(=CN2)C[C@@H](C(=O)O)NC(=O)[C@H](CO)N                         | ATACTC |
| 125 | O=C(O)[C@H](CC1=CNC2=C1C=CC=C2)NC([C@@H](N)CC3=CC=C(C)C=C3)=O                | GCTCCG |
| 126 | CC[C@H](C)[C@@H](C(=O)O)NC(=O)[C@H](CC(=O)N)N                                | TATACG |
| 127 | CC[C@H](C)[C@@H](C(=O)O)NC(=O)[C@H]([C@@H](C)O)N                             | ACTGAC |
| 128 | CC[C@H](C)[C@@H](C(O)=O)NC([C@@H](C)N)=O                                     | TCGAAC |
| 129 | C[C@H]([C@@H](C(=O)N[C@@H](CCC(=O)N)C(=O)O)N)O                               | CACCTG |
| 130 | O=C(N)CC[C@@H](C(O)=O)NC([C@H](N)CC#N)=O                                     | ACATTG |
| 131 | O=C(N)CC[C@@H](C(O)=O)NC([C@@H](N)CC1CCCC1)=O                                | CGACTC |
| 132 | CN(CC(=O)O)C(=O)CN                                                           | TGCGAG |
| 133 | O=C(O)CN(C([C@@H](N)CCCC)=O)C                                                | GACCGT |
| 134 | C[C@@H](C(O)=O)N(C([C@H](CC1=CNC2=C1C=CC=C2)N)=O)C                           | TTAGGA |
| 135 | O=C([C@@H]1N(C([C@H](CCCCNC(C)=O)N)=O)CC(F)(F)C1)O                           | AGCGGC |
| 136 | O=C(O)CNC([C@H](CCCCNC(N)C)C(=O)N)=O                                         | AGCATC |
| 137 | OC1=CC=C(C=C1)C[C@@H](C(O)=O)NC([C@@H](N)CCCC)=O                             | GAGGTC |
| 138 | O=C(O)[C@@H](NC(CN)=O)CC(OC(C)C)C=O                                          | GTGTCT |
| 139 | C[C@H](C(O)=O)NC([C@@H](CO)N)=O                                              | CTAGTG |
| 140 | C[C@H](C(O)=O)NC([C@@H](N)CC1=CC=CN=C1)=O                                    | CGGAGC |
| 141 | C[C@H](C(=O)N[C@H](C)C(=O)O)N                                                | GAGTCG |
| 142 | OC[C@H](C(O)=O)NC([C@@H](CC(C)C)N)=O                                         | GAAGTG |
| 143 | OC[C@H](C(O)=O)NC([C@@H](CC1=CNC2=C1C=CC=C2)N)=O                             | CGTATA |
| 144 | C[C@H]([C@@H](C(=O)O)NC(=O)[C@H](C)N)O                                       | AATACA |
| 145 | C[C@H](O)[C@H](C(O)=O)NC([C@@H](N)CCCC)=O                                    | CTCCTT |
| 146 | OC[C@H](C(O)=O)NC([C@H](N)CC1=CSC=N1)=O                                      | TCTGCT |
| 147 | C[C@H](O)[C@H](C(O)=O)NC(C[C@H](N)C1=CC=CC(F)(F)F=C1)=O                      | CCTTCG |
| 148 | CC(C)C[C@@H](C(O)=O)NC([C@@H](CC1=CC=C(O)C=C1)N)=O                           | GCTCAT |
| 149 | CC(C)C[C@@H](C(=O)O)NC(=O)CN                                                 | CAGGAA |
| 150 | CC(C)C[C@H](C(O)=O)NC([C@@H](CC1=CC=CC=C1)N)=O                               | TGTTGC |
| 151 | CC(C)C[C@@H](C(=O)N[C@H](C(C)C)C(=O)O)N                                      | AGCTTG |
| 152 | CC(C)[C@H](C(O)=O)NC(C[C@@H](N)C1=CC=CC(F)(F)F=C1)=O                         | CAGTGT |
| 153 | CC(C)[C@H](C(O)=O)NC([C@H](N)CC1=CC=CN=C1)=O                                 | GCGAGC |
| 154 | O=C(O)[C@@H](CC1=CC=CC=C1)NC([C@H](N)CCNC(N)=O)=O                            | TGCCAA |
| 155 | C1=CC=C(C=C1)C[C@@H](C(=O)O)NC(=O)[C@H](CC2=CC=C(C=C2)O)N                    | GTAGAG |
| 156 | OC1=CC=C(C=C1)C[C@H](C(O)=O)NC([C@H](C)N)=O                                  | GAGAAG |
| 157 | OC1=CC=C(C=C1)C[C@H](C(O)=O)NC([C@@H]([C@@H](O)C)N)=O                        | TCTCGA |
| 158 | OC1=CC=C(C=C1)C[C@H](C(O)=O)NC([C@H]([C@@H](C)CC)N)=O                        | ATGGCC |
| 159 | O=C(O)[C@@H](CC1=CNC2=C1C=CC=C2)NC([C@H](C(C)C)N)=O                          | GATAGT |
| 160 | C(CC(=O)N)[C@@H](C(=O)O)NC(=O)[C@H](CC(=O)N)N                                | TACGTT |
| 161 | O=C(O)C(C)NC([C@@H](N)CC1=CC=CC=C1)=O)CO                                     | CCTCTG |
| 162 | O=C(O)C(C)NC([C@@H](N)CC(C)C)=O)CO                                           | CGCTCC |
| 163 | O=C(O)C(NC([C@@H](N)CC1=CC=CC=C1)=O)CN2C=CN=C2                               | TTCTAA |
| 164 | O=C(O)C(NC([C@@H](N)CCNC(N)=O)=O)CN1C=CN=C1                                  | ATGATA |
| 165 | O=C(O)[C@H]1N(C([C@@H](CO)N)=O)CCC1                                          | TCGAGA |
| 166 | C1C[C@H](NC1)C(=O)N2CCC[C@H]2C(=O)O                                          | CATCAG |
| 167 | O=C(O)[C@@H]1N(C([C@@H]2NCCC2)=O)CCC1                                        | GAATCT |
| 168 | C1C[C@@H](N(C1)C(=O)CN)C(=O)O                                                | GAACCC |
| 169 | [2H]N[C@H](C)C(=O)N1CCC[C@H]1C(=O)O                                          | TGTGAA |
| 170 | O=C([C@H]1N(C([C@H](CC2=CC=CC=C2)N)=O)C(C)(C)OC1)O                           | TGTGGG |
| 171 | O=C([C@H]1N(C([C@H](CC(C)C)N)=O)C(C)(C)OC1)O                                 | AAGACC |
| 172 | O=C([C@@H]1N(C([C@@H](C(C)C)N)=O)C(C)(C)O[C@H]1C)O                           | GCGCAT |
| 173 | C1C[C@H](N(C1)C(=O)CN)C(=O)O                                                 | AGACCT |
| 174 | O=C([C@H]1N(C([C@H](C)N)=O)C(C)(C)OC1)O                                      | TTATCT |
| 175 | N[C@@H](CCCCNC(C1=CC=C(S(=O)(N)=O)C=C1)=O)C(O)=O                             | CCGGTT |

#### 4.4. Step 1 Headpiece 3' (HP3) Sublibrary

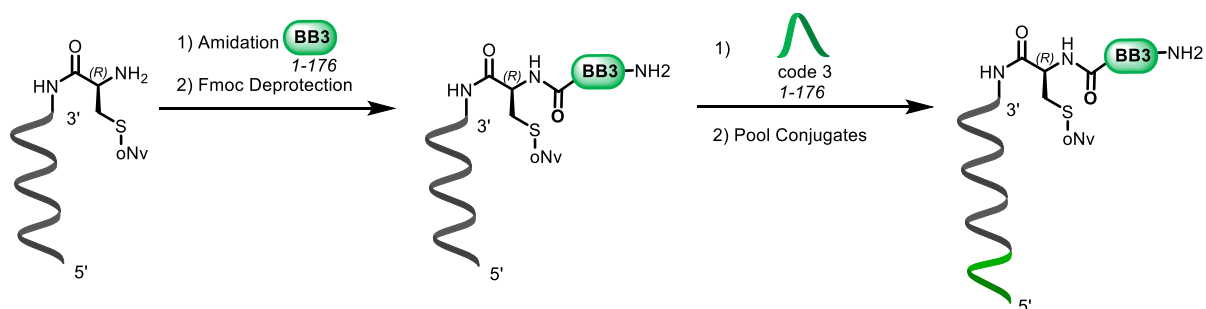

Scaffold modified HP3 DNA was split in 60 nmol portions in 2 mL Eppendorf tubes. 176 amidation reactions were then individually performed for the attachment of all BB3 building blocks. Dipeptide amidations were performed according to the optimized EDC/HOAt protocol in section 2.2 and the rest of the amidations were performed using the DMT-MM protocol in the same section. The reaction products were then redissolved and individually Fmoc deprotected. The deprotection was quenched with sodium acetate buffer, followed by the addition of ethanol to precipitate the DNA product. All 176 reaction products were then individually HPLC-purified, precipitated and their yield was measured. 18 nmol for each HPLC-purified conjugate was taken for encoding step.

Each conjugate was individually encoded using code 3 strands according to procedure in section 2.2. After confirmation of ligation completion via LC-MS all 176 encoded conjugates were pooled and precipitated. The conjugate pool was then purified via HPLC at 60 °C, which enabled separation from excess codes and adaptor left over from the encoding step. The purified pool was precipitated again and analyzed. This afforded a final step 1 HP3 pool of 2240 nmol.

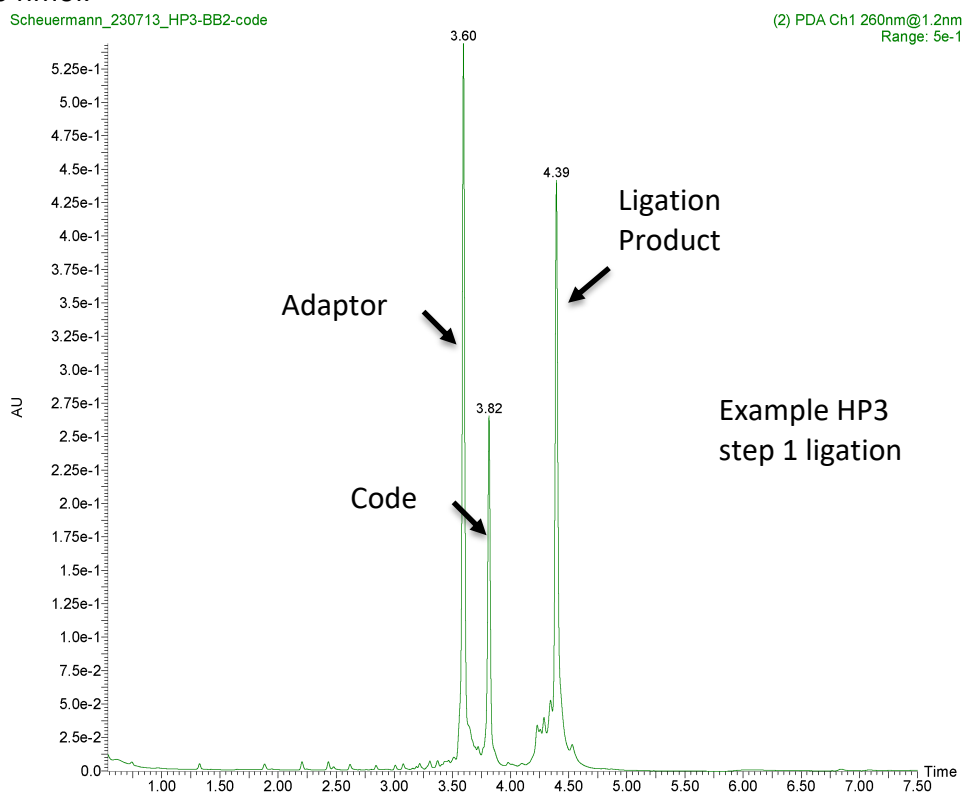

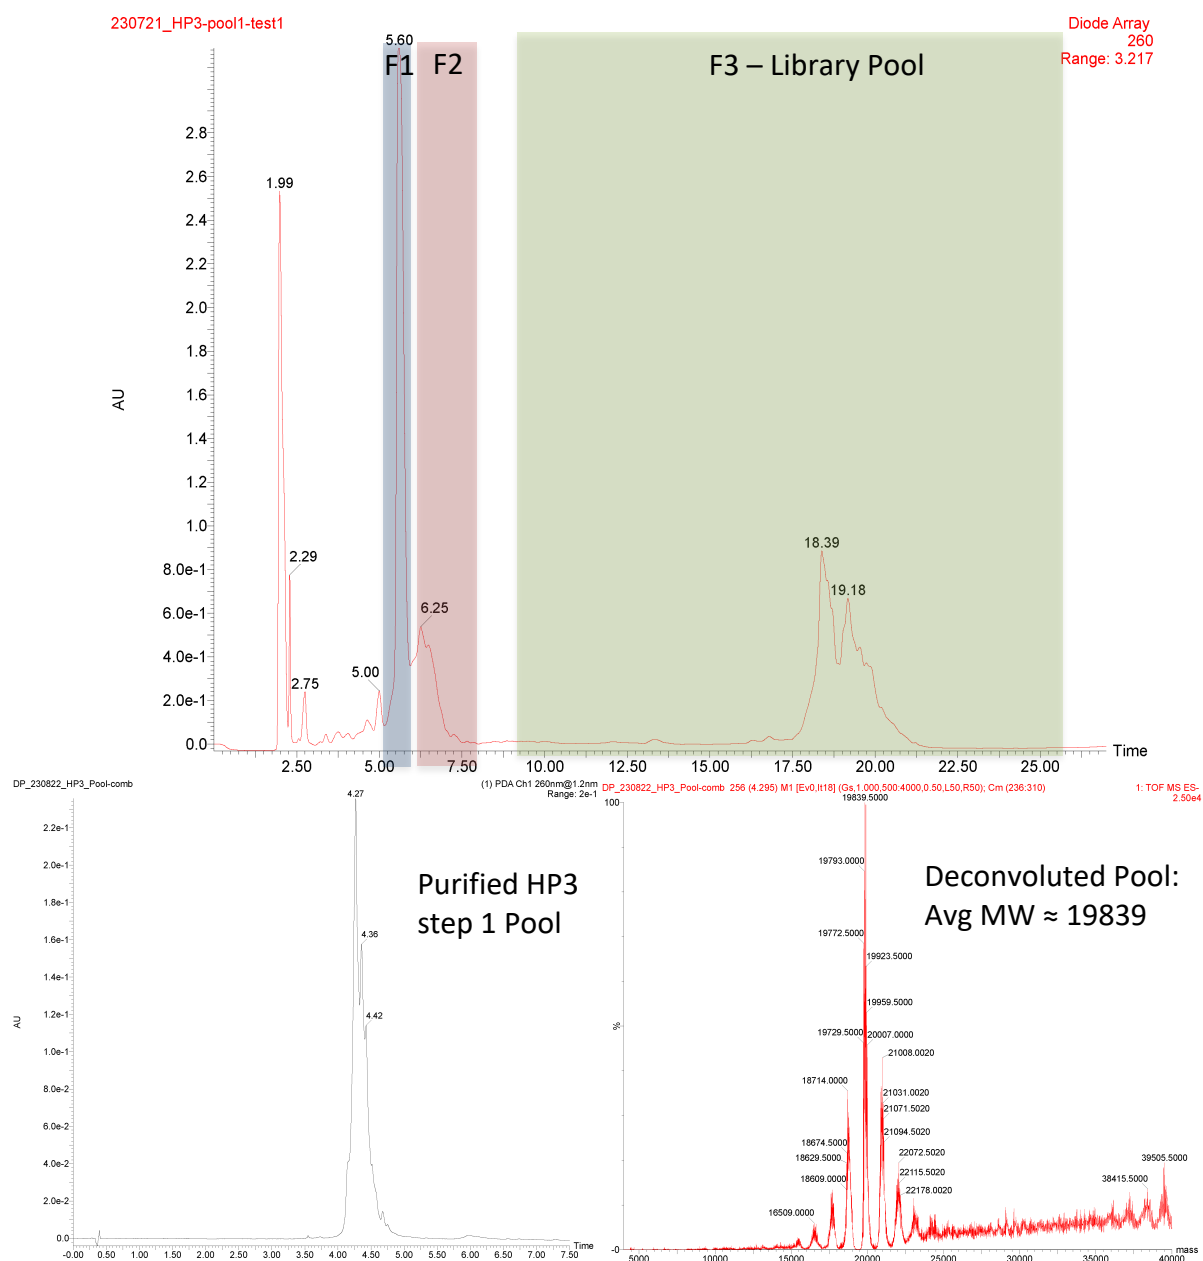

**Figure S21: Characterization of HP3 step 1 library synthesis. Top: Example ligation of code 3 onto building block 2 HP3 conjugate. Middle: HPLC purification of library pool after finished ligation. Bottom: UV chromatogram of purified step 1 HP3 pool and MS deconvolution giving an average mass**

**Table S7: List building blocks 3 and oligonucleotide codons encoding them in the code 3 position**

| BB # | SMILES                                      | Code (5'-3') |
|------|---------------------------------------------|--------------|
| 1    | <chem>C[C@@H](C(=O)O)N</chem>               | TGGTGT       |
| 2    | <chem>C[C@H](C(=O)O)N</chem>                | CCTTGA       |
| 3    | <chem>C[C@@H](C(=O)O)N)O</chem>             | ACGAGT       |
| 4    | <chem>C[C@H](C(=O)O)N)O</chem>              | AGCTCA       |
| 5    | <chem>C[C@H]([C@@H](C(=O)O)N)O</chem>       | CTTGGA       |
| 6    | <chem>C[C@@H]([C@H](C(=O)O)N)O</chem>       | CTCTCT       |
| 7    | <chem>CC(C)[C@@H](C(=O)O)N</chem>           | TATAGA       |
| 8    | <chem>CC(C)[C@H](C(=O)O)N</chem>            | GTATAA       |
| 9    | <chem>CC(C)[C@@H](C(=O)O)N</chem>           | CATAAC       |
| 10   | <chem>CC(C)[C@H](C(=O)O)N</chem>            | CATATG       |
| 11   | <chem>C1=CC=C(C=C1)[C@@H](C(=O)O)N</chem>   | TGCGCC       |
| 12   | <chem>C1=CC=C(C=C1)[C@H](C(=O)O)N</chem>    | TATGAA       |
| 13   | <chem>C1=CC(=CC=C1)[C@@H](C(=O)O)N)O</chem> | AGGCTC       |

|    |                                                               |        |
|----|---------------------------------------------------------------|--------|
| 14 | <chem>C1=CC(=CC=C1C[C@H](C(=O)O)N)O</chem>                    | GTCACG |
| 15 | <chem>C1=CC=C2C(=C1)C(=CN2)C[C@@H](C(=O)O)N</chem>            | CGATTG |
| 16 | <chem>C1=CC=C2C(=C1)C(=CN2)C[C@H](C(=O)O)N</chem>             | TGAATC |
| 17 | <chem>CC[C@H](C)[C@@H](C(=O)O)N</chem>                        | CCAGTT |
| 18 | <chem>CC[C@@H](C)[C@H](C(=O)O)N</chem>                        | AGCTGT |
| 19 | <chem>O=C([C@H]1[C@@H](CN)OCC1)O</chem>                       | AAGACC |
| 20 | NULL                                                          | TAGCGA |
| 21 | <chem>C(C(=O)O)N</chem>                                       | GTTATT |
| 22 | <chem>C([C@@H](C(=O)O)N)C(=O)O</chem>                         | GTACGT |
| 23 | <chem>C([C@H](C(=O)O)N)C(=O)O</chem>                          | TGCACG |
| 24 | <chem>C1CCC(CC1)[C@@H](C(=O)O)N</chem>                        | GTGCTA |
| 25 | <chem>C1CC1C[C@@H](C(=O)O)N</chem>                            | TCGCGC |
| 26 | <chem>C1CC(C1)[C@H](C(=O)O)N</chem>                           | TTACTT |
| 27 | <chem>O=C(O)[C@@H](N)CC1CCCCC1</chem>                         | GTCGTC |
| 28 | <chem>O=C(O)[C@H](N)CC1CCCCC1</chem>                          | CTGGTC |
| 29 | <chem>C1CC1[C@@H](C(=O)O)N</chem>                             | CGTTAA |
| 30 | <chem>CC(C)(C)[C@H](N)C(=O)O</chem>                           | TTGCAC |
| 31 | <chem>O=C(O)[C@@H](N)CC1=CSC=N1</chem>                        | ACTGCG |
| 32 | <chem>O=C(O)[C@H](N)CC1=CSC=N1</chem>                         | GTCAGT |
| 33 | <chem>N[C@@H](CCCNC(N)=O)C(=O)O</chem>                        | TCTATC |
| 34 | <chem>N[C@H](CCCNC(N)=O)C(=O)O</chem>                         | AGAACT |
| 35 | <chem>O=C(C(S1)=CC2=C1CNC2)O</chem>                           | ACGTCT |
| 36 | <chem>N[C@@H](CCCNC(N(C)C)=N)C(=O)O</chem>                    | TTAGCG |
| 37 | <chem>C1=COC(=C1)C[C@@H](C(=O)O)N</chem>                      | ACACAG |
| 38 | <chem>CCCC[C@@H](C(=O)O)N</chem>                              | AGTCGA |
| 39 | <chem>CCCC[C@H](C(=O)O)N</chem>                               | GACAGC |
| 40 | <chem>C1CCC(CC1)CC[C@@H](C(=O)O)N</chem>                      | CCACCG |
| 41 | <chem>O=C(O)C(N)CC1=CC(NC2=C1C=CC=C2)=O</chem>                | GCCGCT |
| 42 | <chem>CC1=CC(=NO1)NC(=O)CSCC(C(=O)O)N</chem>                  | GACATA |
| 43 | <chem>CC(=O)NCCCC[C@@H](C(=O)O)N</chem>                       | CATCTT |
| 44 | <chem>CC(C)(C)C1=CC=C(C=C1)C[C@@H](C(=O)O)N</chem>            | TCCATT |
| 45 | <chem>CC(C)(C)C1=CC=C(C=C1)C[C@H](C(=O)O)N</chem>             | TAGACT |
| 46 | <chem>C1=CC(=CC(=C1)C)CC(C(=O)O)N</chem>                      | ATCTGC |
| 47 | <chem>C1=CC(=CC=C1C[C@@H](C(=O)O)N)Cl</chem>                  | TATTAC |
| 48 | <chem>C1=CC(=CC=C1C[C@H](C(=O)O)N)Cl</chem>                   | GCGGAT |
| 49 | <chem>C1=CC=C(C(=C1)C[C@@H](C(=O)O)N)Cl</chem>                | AAGTAC |
| 50 | <chem>O=C(O)[C@@H](N)CC1=CC=C(C1)C(C1)=C1</chem>              | CGGCTA |
| 51 | <chem>C1=CC=C(C=C1)[C@@H](C(=O)O)N</chem>                     | ATCCAC |
| 52 | <chem>C1=CC(=CC(=C1)C)[C@@H](C(=O)O)N</chem>                  | AAGCAA |
| 53 | <chem>C1=CC(=CC=C1C[C@H](C(=O)O)N)[N+](=O)[O-]</chem>         | TTGGTG |
| 54 | <chem>C1=CC(=CC=C1C[C@@H](C(=O)O)N)C(=O)N</chem>              | GTAAGA |
| 55 | <chem>COC1=CC=C(C=C1)C[C@H](C(=O)O)N</chem>                   | AATCTG |
| 56 | <chem>C1=CC=C2C(=C1)C=CC=C2C[C@@H](C(=O)O)N</chem>            | CAATAA |
| 57 | <chem>C1=CC=C(C=C1)C(=O)C2=CC=C(C=C2)C[C@@H](C(=O)O)N</chem>  | GTATGC |
| 58 | <chem>C(C1=C(C(=C(C1F)F)F)F)[C@@H](C(=O)O)N</chem>            | GCTACT |
| 59 | <chem>O=C(O)[C@@H](N)C(C1=CC=CC=C1)C2=CC=CC=C2</chem>         | CTGCAA |
| 60 | <chem>C1=CC(=CC=C1C[C@@H](C(=O)O)N)CP(=O)(O)O</chem>          | AGGTCC |
| 61 | <chem>C1=CC(=CN=C1)C[C@@H](C(=O)O)N</chem>                    | TTATCC |
| 62 | <chem>C1=CC(=CN=C1)C[C@H](C(=O)O)N</chem>                     | CAACTA |
| 63 | <chem>C1=CC=C(C=C1)COC[C@H](C(=O)O)N</chem>                   | GAGCCT |
| 64 | <chem>C1=CC(=CC=C1CC(C(=O)O)N)C#N</chem>                      | TGTACA |
| 65 | <chem>O=C(O)[C@@H](N)C/C=C/C1=CC=CC=C1</chem>                 | AGTCAT |
| 66 | <chem>O=C(O)[C@@H](N)CC1=CC=C(C2=CC=CC=C2)C=C1</chem>         | ACCGTA |
| 67 | <chem>O=C(O)C(N)CC1=CC=C(OCO2)C2=C1</chem>                    | CTCAAC |
| 68 | <chem>O=C(O)[C@@H](N)C1CC2=C(C=CC=C2)C1</chem>                | AATGCC |
| 69 | <chem>C1=CC=C(C(=C1)CC(C(=O)O)N)O</chem>                      | GCGTCA |
| 70 | <chem>O=C(O)[C@@H](N)CC1=CC=C(OCC2=C(Cl)C=CC=C2Cl)C=C1</chem> | TATCAG |
| 71 | <chem>O=C(O)[C@H](CC1=CC=CS1)N</chem>                         | TTCACA |
| 72 | <chem>C1=C(NC=N1)C[C@@H](C(=O)O)N</chem>                      | TCTTAG |
| 73 | <chem>C[C@@H](CC(=O)O)N</chem>                                | CGCACT |
| 74 | <chem>CC(C)[C@@H](CC(=O)O)N</chem>                            | AGATGA |
| 75 | <chem>CC(C)[C@H](CC(=O)O)N</chem>                             | GCTAAC |
| 76 | <chem>C1=CC=C(C=C1)C[C@@H](CC(=O)O)N</chem>                   | GATGAT |
| 77 | <chem>C(CN)C(=O)O</chem>                                      | CCAGAG |
| 78 | <chem>C1=CC(=CC(=C1)C(F)(F)F)[C@H](CC(=O)O)N</chem>           | CTTCTC |
| 79 | <chem>C1=CC(=CC(=C1)C(F)(F)F)[C@@H](CC(=O)O)N</chem>          | GATTGC |
| 80 | <chem>C1=CC(=CC=C1C[C@@H](CC(=O)O)N)O</chem>                  | CGCGAC |

|     |                                                                             |        |
|-----|-----------------------------------------------------------------------------|--------|
| 81  | CC1=CC=C(C=C1)C[C@H](CC(=O)O)N                                              | TATTGT |
| 82  | N[C@H](CC1=CC=CC=C1Cl)CC(O)=O                                               | CCACAC |
| 83  | O=C(O)C[C@H](N)CC1=CC=C(Cl)C(Cl)=C1                                         | CTGCGC |
| 84  | C1=CC(=CC=C1C[C@@H](CC(=O)O)N)Cl                                            | CGTCAC |
| 85  | N[C@H](CCC(N)=O)CC(O)=O                                                     | AGTGTT |
| 86  | C1C[C@H](NC1)C(=O)O                                                         | CGCTAG |
| 87  | C1C[C@H](NC1)C(=O)O                                                         | TCAATG |
| 88  | C1CNC[C@H]1C(=O)O                                                           | GACTTG |
| 89  | O=C([C@H]1NC[C@H](O)C1)O                                                    | AATTGA |
| 90  | C1CCN[C@H](C1)C(=O)O                                                        | AACCGA |
| 91  | C1C[C@H](CNC1)C(=O)O                                                        | GTCCGC |
| 92  | C1CNCCC1C(=O)O                                                              | TGACTG |
| 93  | C1CNC(=O)[C@@H](N1)CC(=O)O                                                  | CTTGAG |
| 94  | O=C(C1=CN(C2CNC2)N=N1)O                                                     | GTGAAT |
| 95  | C1CN[C@@H]1C(=O)O                                                           | TAACAA |
| 96  | O=C([C@H]1CNC[C@@H]1C2=CC=C(Cl)C=C2)O                                       | GCGGTA |
| 97  | O=C([C@H]1NCC2=C(C=CC=C2)C1)O                                               | GCGTAG |
| 98  | OC(C[C@H]1NCCC1)=O                                                          | TGGTCA |
| 99  | O=C([C@]12CNC[C@@]1([H])CCO2)O                                              | CTAGCT |
| 100 | O=C(C1=CC=NC2=C1CNC2)O                                                      | AGTAGT |
| 101 | C1CC2(CNC2)OC1C(=O)O                                                        | CCTGTC |
| 102 | C1=CC=C(C=C1)CC(C(=O)NCC(=O)O)N                                             | CGTACG |
| 103 | O=C(O)CNC([C@@H](N)CC1=CSC=N1)=O                                            | CGACGA |
| 104 | O=C(C1=NOC2(CCNCC2)C1)O                                                     | CGCGCG |
| 105 | C[C@@H](C(O)=O)NC([C@@H](CC(C)C)N)=O                                        | TGAGAA |
| 106 | C[C@@H](C(O)=O)NC([C@H](N)CCCC)=O                                           | ATAGAT |
| 107 | C[C@@H](C(O)=O)NC([C@@H](N)CC1=CSC=N1)=O                                    | CTCTTA |
| 108 | OC[C@@H](C(O)=O)NC([C@H](N)CC1CCCC1)=O                                      | ATGCCG |
| 109 | C1=CC(=CC=C1C[C@@H](C(=O)N[C@@H](CO)C(=O)O)N)O                              | TGATCG |
| 110 | CC(C)[C@H](C(=O)N[C@@H](CO)C(=O)O)N                                         | AATGGT |
| 111 | C[C@@H]([C@@H](C(=O)O)NC(=O)[C@@H]1CCCN1)O                                  | TAGTTC |
| 112 | C[C@@H](O)[C@@H](C(O)=O)NC([C@@H]([C@@H](O)C)N)=O                           | CAGATA |
| 113 | C[C@@H](O)[C@@H](C(O)=O)NC([C@@H](N)C1CC2=C(C=CC=C2)C1)=O                   | AGATAT |
| 114 | CC(C)C[C@H](C(=O)O)NC(=O)[C@H](C(C)C)N                                      | CAATCT |
| 115 | CC(C)C[C@@H](C(O)=O)NC([C@H](CCCCNC(C)=O)N)=O                               | GACTAA |
| 116 | C[C@H]([C@@H](C(=O)N[C@@H](C(C)C)C(=O)O)N)O                                 | GAACAC |
| 117 | C[C@@H](C(=O)N[C@@H](C(C)C)C(=O)O)N                                         | ATGCGT |
| 118 | CC(C)[C@@H](C(O)=O)NC([C@@H](N)CC(OC)=O)=O                                  | ACAGGC |
| 119 | O=C(O)CNC([C@@H](N)CC(OC)=O)=O                                              | GCGCGA |
| 120 | O=C(O)[C@H](CC1=CC=CC=C1)NC([C@@H](N)C2CC3=C(C=CC=C3)C2)=O                  | TCAGAT |
| 121 | CC(C)C[C@@H](C(=O)N[C@@H](CC1=CC=CC=C1)C(=O)O)N                             | TCTGTG |
| 122 | OC1=CC=C(C=C1)C[C@H](C(O)=O)NC([C@@H](C(C)C)N)=O                            | ATCTAG |
| 123 | OC1=CC=C(C=C1)C[C@H](C(O)=O)NC([C@@H](N)CCCNC(N)=O)=O                       | GCCTCC |
| 124 | OC1=CC=C(C=C1)C[C@H](C(O)=O)NC([C@H](N)CC2=CC=C(Cl)C=C2)=O                  | TGCATA |
| 125 | C1=CC=C2C(=C1)C(=CN2)C[C@@H](C(=O)O)NC(=O)[C@H](CO)N                        | ATACTC |
| 126 | O=C(O)[C@H](CC1=CNC2=C1C=CC=C2)NC([C@@H](N)CC3=CC=C(Cl)C=C3)=O              | GCTCCG |
| 127 | CC[C@H](C)[C@@H](C(=O)O)NC(=O)[C@H](CC(=O)N)N                               | TATACG |
| 128 | CC[C@H](C)[C@@H](C(=O)O)NC(=O)[C@H]([C@@H](C)O)N                            | ACTGAC |
| 129 | CC[C@H](C)[C@@H](C(O)=O)NC([C@@H](C)N)=O                                    | TCGAAC |
| 130 | C[C@H]([C@@H](C(=O)N[C@@H](CCC(=O)N)C(=O)O)N)O                              | CACCTG |
| 131 | O=C(N)CC[C@@H](C(O)=O)NC([C@H](N)CC#N)=O                                    | ACATTG |
| 132 | O=C(N)CC[C@@H](C(O)=O)NC([C@@H](N)CC1CCCC1)=O                               | CGACTC |
| 133 | CN(CC(=O)O)C(=O)CN                                                          | TGCGAG |
| 134 | O=C(O)CN(C([C@@H](N)CCCC)=O)C                                               | GACCGT |
| 135 | C[C@@H](C(O)=O)N(C([C@H](CC1=CNC2=C1C=CC=C2)N)=O)C                          | TTAGGA |
| 136 | O=C([C@@H]1N(C([C@H](CCCCNC(C)=O)N)=O)CC(F)(F)C1)O                          | AGCGGC |
| 137 | C1=NC(=C2C(=N1)N(C=N2)[C@H]3[C@@H]([C@H]([C@H](O3)CSCC[C@@H](C(=O)O)N)O)O)N | AGCATC |
| 138 | OC1=CC=C(C=C1)C[C@H](C(O)=O)NC([C@@H](N)CCCC)=O                             | GAGGTC |
| 139 | O=C(O)[C@@H](NC(CN)=O)CC(OC(C)C)C(=O)O                                      | GTGTCT |
| 140 | C[C@H](C(O)=O)NC([C@@H](CO)N)=O                                             | CTAGTG |
| 141 | C[C@H](C(O)=O)NC([C@@H](N)CC1=CC=CN=C1)=O                                   | CGGAGC |
| 142 | C[C@H](C(=O)N[C@@H](C)C(=O)O)N                                              | GAGTCG |
| 143 | OC[C@H](C(O)=O)NC([C@@H](CC(C)C)N)=O                                        | GAAGTG |
| 144 | OC[C@H](C(O)=O)NC([C@@H](CC1=CNC2=C1C=CC=C2)N)=O                            | CGTATA |
| 145 | C[C@H]([C@@H](C(=O)O)NC(=O)[C@H](C)N)O                                      | AATACA |
| 146 | C[C@H](O)[C@H](C(O)=O)NC([C@@H](N)CCCC)=O                                   | CTCCTT |
| 147 | OC[C@H](C(O)=O)NC([C@H](N)CC1=CSC=N1)=O                                     | TCTGCT |

|     |                                                                       |        |
|-----|-----------------------------------------------------------------------|--------|
| 148 | <chem>C[C@H](O)[C@H](C(O)=O)NC(C[C@H](N)C1=CC=CC(F)(F)F)=O</chem>     | CCTTCG |
| 149 | <chem>CC(C)C[C@H](C(O)=O)NC([C@H](CC1=CC=C(O)C=C1)N)=O</chem>         | GCTCAT |
| 150 | <chem>CC(C)C[C@H](C(=O)O)NC(=O)CN</chem>                              | CAGGAA |
| 151 | <chem>CC(C)C[C@H](C(O)=O)NC([C@H](CC1=CC=CC=C1)N)=O</chem>            | TGTTGC |
| 152 | <chem>CC(C)C[C@H](C(=O)N[C@H](C(C)C)C(=O)O)N</chem>                   | AGCTTG |
| 153 | <chem>CC(C)[C@H](C(O)=O)NC(C[C@H](N)C1=CC=CC(F)(F)F)=O</chem>         | CAGTGT |
| 154 | <chem>CC(C)[C@H](C(O)=O)NC([C@H](N)CC1=CC=CC=C1)=O</chem>             | GCGAGC |
| 155 | <chem>O=C(O)[C@H](CC1=CC=CC=C1)NC([C@H](N)CCCNC(N)=O)=O</chem>        | TGCCAA |
| 156 | <chem>C1=CC=C(C=C1)C[C@H](C(=O)O)NC(=O)[C@H](CC2=CC=C(C=C2)O)N</chem> | GTAGAG |
| 157 | <chem>OC1=CC=C(C=C1)C[C@H](C(O)=O)NC([C@H](C)N)=O</chem>              | GAGAAG |
| 158 | <chem>OC1=CC=C(C=C1)C[C@H](C(O)=O)NC([C@H]([C@H](O)C)N)=O</chem>      | TCTCGA |
| 159 | <chem>OC1=CC=C(C=C1)C[C@H](C(O)=O)NC([C@H]([C@H](C)CC)N)=O</chem>     | ATGGCC |
| 160 | <chem>O=C(O)[C@H](CC1=CC=CC=C1)NC([C@H](C(C)C)N)=O</chem>             | GATAGT |
| 161 | <chem>C(CC(=O)N)[C@H](C(=O)O)NC(=O)[C@H](CC(=O)N)N</chem>             | TACGTT |
| 162 | <chem>O=C(O)C(C)(NC([C@H](N)CC1=CC=CC=C1)=O)CO</chem>                 | CCTCTG |
| 163 | <chem>O=C(O)C(C)(NC([C@H](N)CC(C)C)=O)CO</chem>                       | CGCTCC |
| 164 | <chem>O=C(O)C(NC([C@H](N)CC1=CC=CC=C1)=O)CN2C=CC=C2</chem>            | TTCTAA |
| 165 | <chem>O=C(O)C(NC([C@H](N)CCCNC(N)=O)=O)CN1C=CC=C1</chem>              | ATGATA |
| 166 | <chem>O=C(O)[C@H]1N(C([C@H](CO)N)=O)CCC1</chem>                       | TCGAGA |
| 167 | <chem>C1C[C@H](NC1)C(=O)N2CCC[C@H]2C(=O)O</chem>                      | CCTACA |
| 168 | <chem>O=C(O)[C@H]1N(C([C@H]2NCCC2)=O)CCC1</chem>                      | CTGCTC |
| 169 | <chem>C1C[C@H](N(C1)C(=O)CN)C(=O)O</chem>                             | GAAGTA |
| 170 | <chem>[2H]N[C@H](C)C(=O)N1CCC[C@H]1C(=O)O</chem>                      | AATATG |
| 171 | <chem>O=C([C@H]1N(C([C@H](CC2=CC=CC=C2)N)=O)C(C)(C)OC1)O</chem>       | GGAAGC |
| 172 | <chem>O=C([C@H]1N(C([C@H](CC(C)C)N)=O)C(C)(C)OC1)O</chem>             | GCGCGG |
| 173 | <chem>O=C([C@H]1N(C([C@H](C(C)C)N)=O)C(C)(C)O[C@H]1C)O</chem>         | CCTGGC |
| 174 | <chem>C1C[C@H](N(C1)C(=O)CN)C(=O)O</chem>                             | CCGAGG |
| 175 | <chem>O=C([C@H]1N(C([C@H](C)N)=O)C(C)(C)OC1)O</chem>                  | CGTTCC |
| 176 | <chem>N[C@H](CCCCNC1=CC=C(S(=O)(N)=O)C=C1)=O)C(O)=O</chem>            | GCGCCG |

#### 4.5. Step 2 Headpiece 5' (HP5) Sublibrary

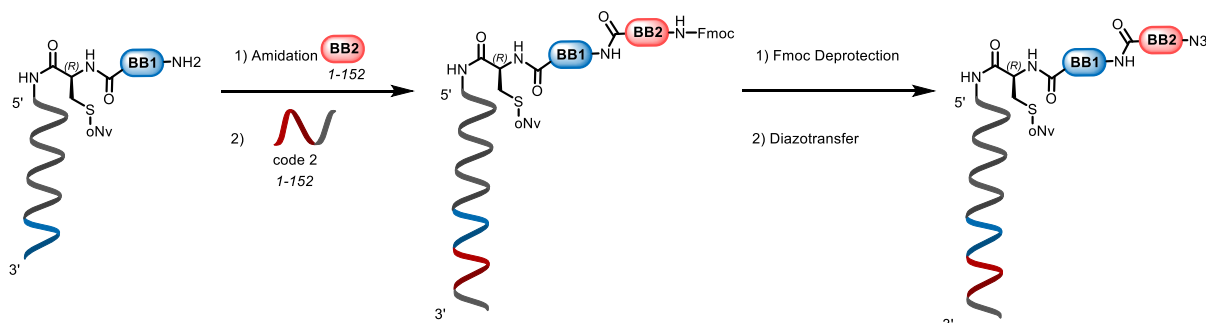

Purified step 1 HP5 pool was split in 19 nmol portions 152 times in 2 mL Eppendorf tubes. Step 2 amidations were performed according to general protocols in section 2.2 (volumes not scaled down due to less starting material). After reaction precipitation, all pool conjugates were ligated with code 2 strands according to general procedure. Ligation progress was checked via LC-MS. After successful ligation, all conjugates were repooled and precipitated. The pellets were redissolved and stored in a -20 °C freezer.

20% of the resulting product was transferred to a new 15 mL falcon tube and subjected to Fmoc deprotection. The deprotection was quenched with sodium acetate and precipitated with ethanol. The product was then split into 10 2 mL Eppendorf tubes and diazotransfer was carried out according to general conditions. The azido-modified product was then HPLC-purified at 60 °C to remove excess codes/adaptor, precipitated and analyzed. This afforded a final yield of 350 nmol of HP5 step 2 pool.

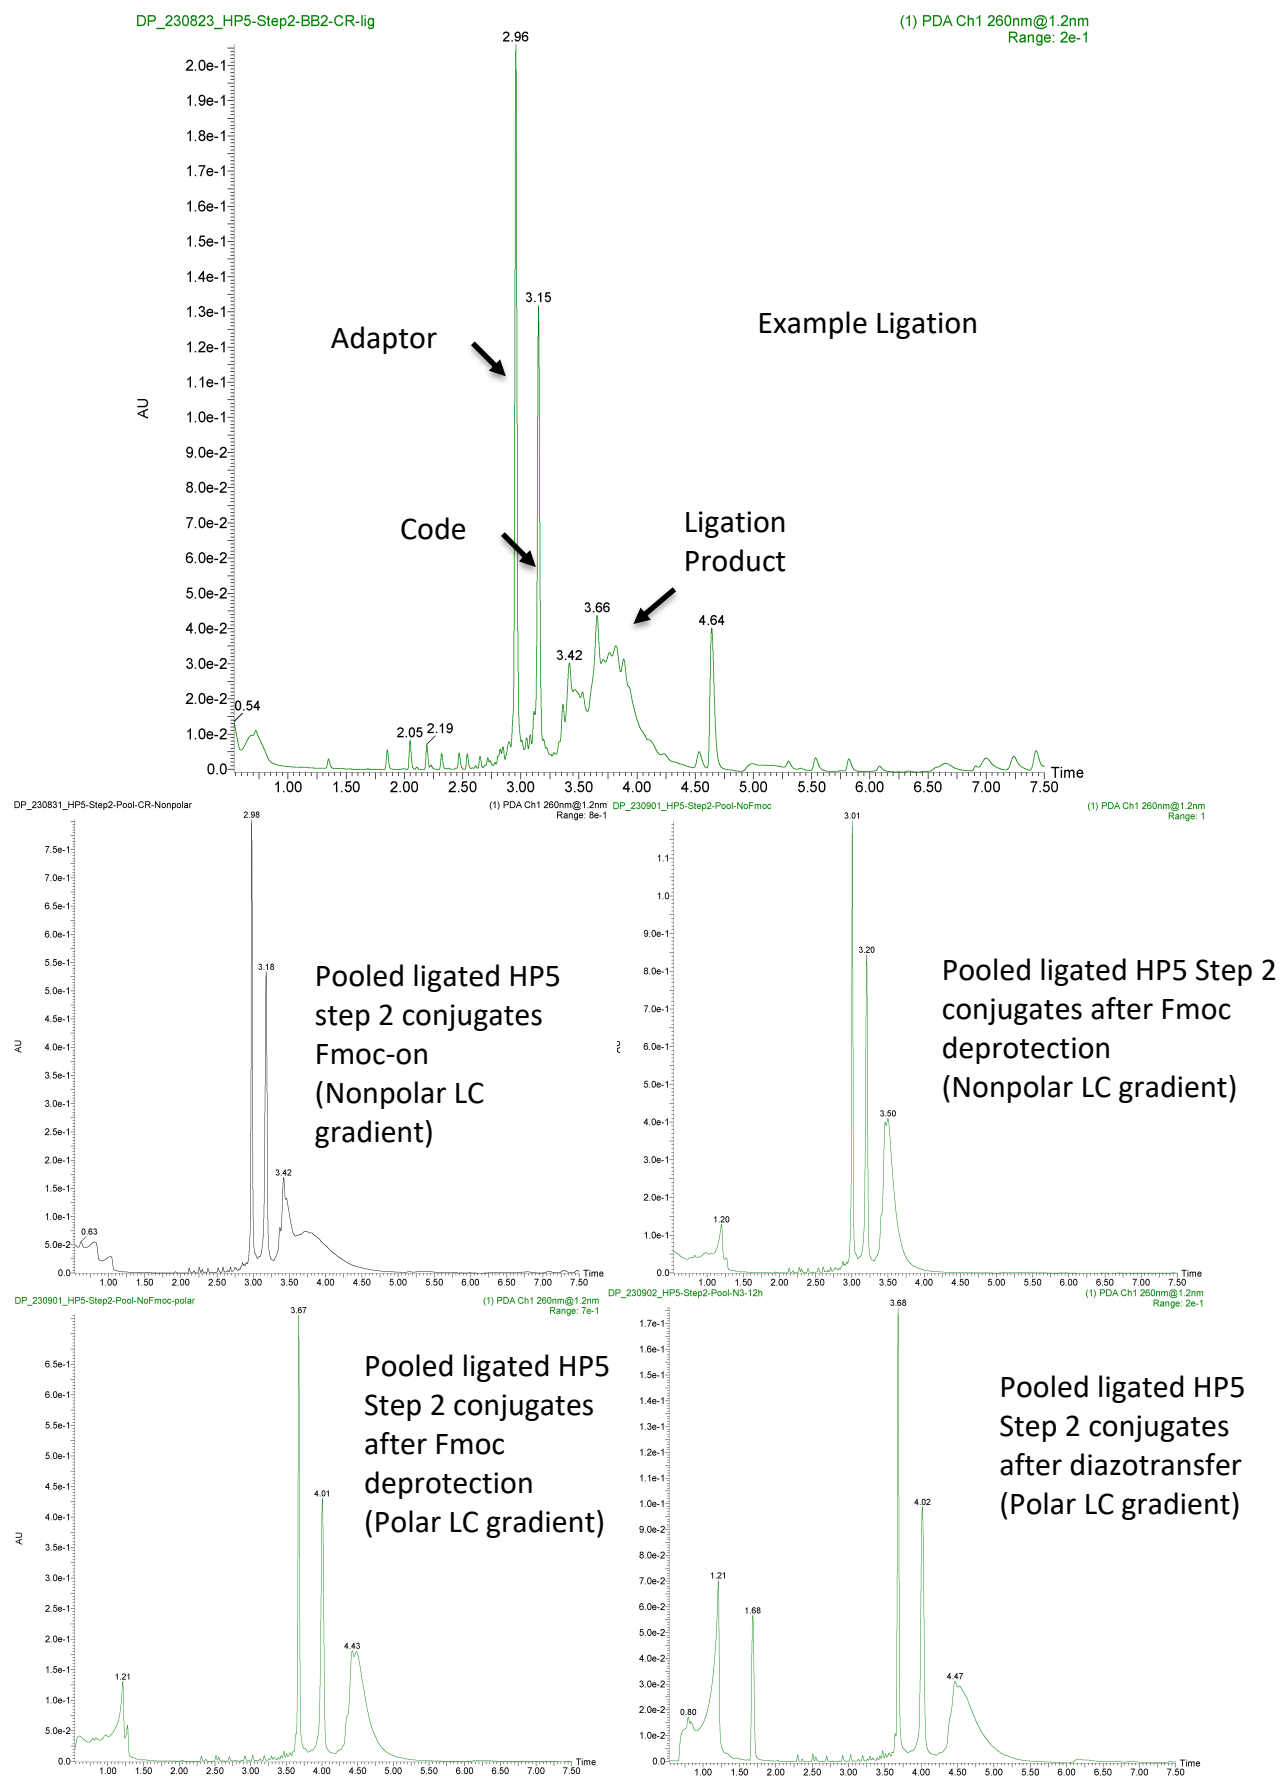

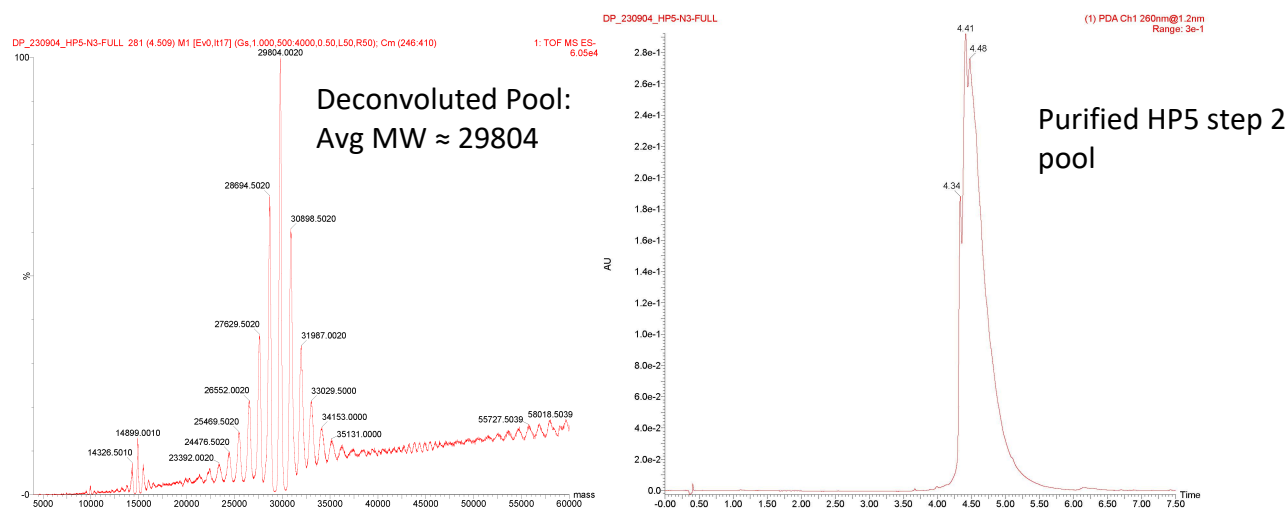

**Figure S22: Characterization of HP5 step 2 library synthesis. Top: Example ligation of code 2 onto building block 2 HP5 pool 1 conjugates. Middle: Characterization of reaction steps performed on HP5 step 2 pool. Bottom: UV 260 nm of purified HP5 step 2 pool and average deconvoluted mass**

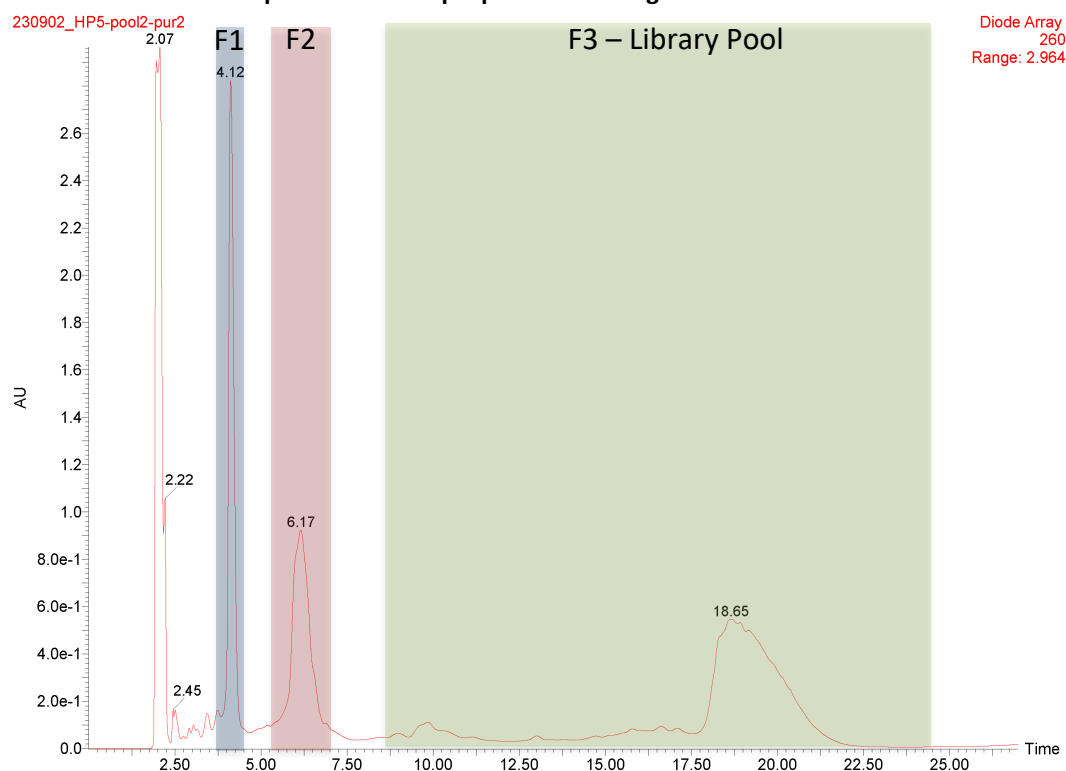

**Figure S23: HPLC purification of HP5 step 2 library pool after finished ligation**

**Table S8: List building blocks 2 and oligonucleotide codons encoding them in the code 2 position**

| BB # | SMILES                                    | Code (5'-3') |
|------|-------------------------------------------|--------------|
| 1    | <chem>C[C@@H](C(=O)O)N</chem>             | GTCTCA       |
| 2    | <chem>C[C@H](C(=O)O)N</chem>              | CGCAGAG      |
| 3    | <chem>C[C@@H](C(=O)O)N</chem>             | GCTTGAA      |
| 4    | <chem>C[C@H](C(=O)O)N</chem>              | ATACTA       |
| 5    | <chem>C[C@H]([C@@H](C(=O)O)N)O</chem>     | GTAGGCC      |
| 6    | <chem>C[C@H]([C@H](C(=O)O)N)O</chem>      | CCAGCTC      |
| 7    | <chem>CC(C)[C@@H](C(=O)O)N</chem>         | TGTTCTC      |
| 8    | <chem>CC(C)[C@H](C(=O)O)N</chem>          | TTGATCG      |
| 9    | <chem>CC(C)[C@H](C(=O)O)N</chem>          | AAGTTGA      |
| 10   | <chem>CC(C)[C@H](C(=O)O)N</chem>          | GTCGAGT      |
| 11   | <chem>C1=CC=C(C=C1)[C@@H](C(=O)O)N</chem> | CATTAGC      |
| 12   | <chem>C1=CC=C(C=C1)[C@H](C(=O)O)N</chem>  | ATGTCCA      |
| 13   | <chem>C1=CC(=CC=C1)[C@@H](C(=O)O)N</chem> | TCCTAAT      |

|    |                                                              |         |
|----|--------------------------------------------------------------|---------|
| 14 | <chem>C1=CC(=CC=C1C[C@H](C(=O)O)N)O</chem>                   | GATACAC |
| 15 | <chem>C1=CC=C2C(=C1)C(=CN2)C[C@@H](C(=O)O)N</chem>           | GAATCAG |
| 16 | <chem>C1=CC=C2C(=C1)C(=CN2)C[C@H](C(=O)O)N</chem>            | AGCGAAG |
| 17 | <chem>CC[C@H](C)[C@@H](C(=O)O)N</chem>                       | ATTCCAA |
| 18 | <chem>CC[C@@H](C)[C@H](C(=O)O)N</chem>                       | TCTGCGA |
| 19 | <chem>C(CC(=O)N)[C@@H](C(=O)O)N</chem>                       | GCGCATA |
| 20 | <chem>C(CC(=O)N)[C@H](C(=O)O)N</chem>                        | TTGACAC |
| 21 | <chem>C(C(=O)O)N</chem>                                      | CGTGGTT |
| 22 | <chem>C([C@@H](C(=O)O)N)C(=O)O</chem>                        | AACTGCC |
| 23 | <chem>C([C@H](C(=O)O)N)C(=O)O</chem>                         | CAGGCTG |
| 24 | <chem>C1CCC(CC1)[C@@H](C(=O)O)N</chem>                       | TTCACGA |
| 25 | <chem>C1CC1C[C@@H](C(=O)O)N</chem>                           | GTGAACG |
| 26 | <chem>C1CC(C1)[C@H](C(=O)O)N</chem>                          | AAGTTAT |
| 27 | <chem>O=C(O)[C@@H](N)CC1CCCCC1</chem>                        | AGCACTG |
| 28 | <chem>O=C(O)[C@H](N)CC1CCCCC1</chem>                         | TTCGGAG |
| 29 | <chem>C1CC1[C@@H](C(=O)O)N</chem>                            | TTGCGGT |
| 30 | <chem>O=C(O)[C@@H](N)CC1=CSC=N1</chem>                       | GATTACC |
| 31 | <chem>O=C(O)[C@H](N)CC1=CSC=N1</chem>                        | CGACTAC |
| 32 | <chem>N[C@@H](CCCNC(N)=O)C(O)=O</chem>                       | CTAGACC |
| 33 | <chem>N[C@H](CCCNC(N)=O)C(O)=O</chem>                        | ATGCTCT |
| 34 | <chem>C=CC[C@H](CC(=O)O)N</chem>                             | CGTCATA |
| 35 | <chem>N[C@@H](CCCNC(N(C)C)=N)C(O)=O</chem>                   | CACTCTT |
| 36 | <chem>C1=COCC(=C1)C[C@@H](C(=O)O)N</chem>                    | CACAATA |
| 37 | <chem>CCCC[C@H](C(=O)O)N</chem>                              | TCGATAT |
| 38 | <chem>CCCC[C@H](C(=O)O)N</chem>                              | CCGCCGC |
| 39 | <chem>C1CCC(CC1)CC[C@@H](C(=O)O)N</chem>                     | TTAACAG |
| 40 | <chem>O=C(O)C(N)CC1=CC(NC2=C1C=CC=C2)=O</chem>               | GCTGGTT |
| 41 | <chem>CC(=O)NCCCC[C@@H](C(=O)O)N</chem>                      | GCAGCCG |
| 42 | <chem>CC(C)(C)C1=CC=C(C=C1)C[C@@H](C(=O)O)N</chem>           | GAACCAT |
| 43 | <chem>CC(C)(C)C1=CC=C(C=C1)C[C@H](C(=O)O)N</chem>            | TTCTTAT |
| 44 | <chem>C1=CC(=CC(=C1)C)CC(C(=O)O)N</chem>                     | AGTATTC |
| 45 | <chem>C1=CC(=CC=C1C[C@@H](C(=O)O)N)Cl</chem>                 | GAGATAC |
| 46 | <chem>C1=CC(=CC=C1C[C@H](C(=O)O)N)Cl</chem>                  | GAAGGAC |
| 47 | <chem>C1=CC=C(C(=C1)C[C@@H](C(=O)O)N)Cl</chem>               | GTAATCA |
| 48 | <chem>O=C(O)[C@@H](N)CC1=CC=C(Cl)C(Cl)=C1</chem>             | CATCCTA |
| 49 | <chem>C1=CC=C(C=C1)[C@@H](C(=O)O)N</chem>                    | CTATACA |
| 50 | <chem>C1=CC(=CC(=C1)Cl)[C@@H](C(=O)O)N</chem>                | GAACGAG |
| 51 | <chem>C1=CC(=CC=C1C[C@H](C(=O)O)N)[N+](=O)[O-]</chem>        | CAATCGT |
| 52 | <chem>C1=CC(=CC=C1C[C@@H](C(=O)O)N)C(=O)N</chem>             | CACAGGC |
| 53 | <chem>COC1=CC=C(C=C1)[C@H](C(=O)O)N</chem>                   | ACAGGCA |
| 54 | <chem>C1=CC=C2C(=C1)C=CC=C2C[C@@H](C(=O)O)N</chem>           | AGAGTGC |
| 55 | <chem>C1=CC=C(C=C1)C(=O)C2=CC=C(C=C2)C[C@@H](C(=O)O)N</chem> | ACTTGCG |
| 56 | <chem>C(C1=C(C(=C(C(=C1F)F)F)F)[C@@H](C(=O)O)N</chem>        | CAAGTCT |
| 57 | <chem>O=C(O)[C@@H](N)C(C1=CC=CC=C1)C2=CC=CC=C2</chem>        | AATCAGT |
| 58 | <chem>C1=CC(=CC=C1C[C@@H](C(=O)O)N)CP(=O)(O)O</chem>         | CCATTAC |
| 59 | <chem>C1=CC(=CN=C1)C[C@@H](C(=O)O)N</chem>                   | TGATAAG |
| 60 | <chem>C1=CC(=CN=C1)C[C@H](C(=O)O)N</chem>                    | TAGAGTT |
| 61 | <chem>C1=CC=C(C=C1)COC[C@H](C(=O)O)N</chem>                  | AAGTATA |
| 62 | <chem>C1=CC(=CC=C1CC(C(=O)O)N)C#N</chem>                     | ATGCCTG |
| 63 | <chem>O=C(O)[C@@H](N)C/C=C/C1=CC=CC=C1</chem>                | TTCCGCG |
| 64 | <chem>O=C(O)[C@@H](N)CC1=CC=C(C2=CC=CC=C2)C=C1</chem>        | GCCAATC |
| 65 | <chem>O=C(O)C(N)CC1=CC=C(OCO2)C2=C1</chem>                   | GTAAGAA |
| 66 | <chem>O=C(O)[C@@H](N)C1CC2=C(C=CC=C2)C1</chem>               | CAGGCGA |
| 67 | <chem>C1=CC=C(C(=C1)CC(C(=O)O)N)O</chem>                     | TGTCGAG |
| 68 | <chem>O=C(O)[C@H](CC1=CC=CS1)N</chem>                        | CGTATAT |
| 69 | <chem>C[C@@H](CC(=O)O)N</chem>                               | TGCAAGC |
| 70 | <chem>CC(C)[C@@H](CC(=O)O)N</chem>                           | TAAGGCT |
| 71 | <chem>CC(C)[C@H](CC(=O)O)N</chem>                            | GACTCCT |
| 72 | <chem>C1=CC=C(C=C1)C[C@@H](CC(=O)O)N</chem>                  | TGTCGCT |
| 73 | <chem>C(CN)C(=O)O</chem>                                     | CTTCCGA |
| 74 | <chem>C1=CC(=CC(=C1)C(F)F)[C@H](CC(=O)O)N</chem>             | TTCGCCT |
| 75 | <chem>C1=CC(=CC(=C1)C(F)F)[C@@H](CC(=O)O)N</chem>            | CTAGCAT |
| 76 | <chem>C1=CC(=CC=C1C[C@@H](CC(=O)O)N)O</chem>                 | AGAGGAT |
| 77 | <chem>CC1=CC=C(C=C1)C[C@H](CC(=O)O)N</chem>                  | AAGCCAG |
| 78 | <chem>N[C@H](CC1=CC=CC=C1Cl)CC(O)=O</chem>                   | AATGGAG |
| 79 | <chem>N[C@H](CCC(N)=O)CC(O)=O</chem>                         | TCCAGTT |
| 80 | <chem>C1=CC(=CC=C1CC(=O)O)CN</chem>                          | CTGTGAG |

|     |                                                                |          |
|-----|----------------------------------------------------------------|----------|
| 81  | C1=CC(=CC=C1)CN)CC(=O)O                                        | GTCITGTC |
| 82  | C1=CC=C(C(=C1)CC(=O)O)CN                                       | ATTAGTA  |
| 83  | O=C([C@H]1CC[C@@H](N)CC1)O                                     | CGTAGCT  |
| 84  | O=C([C@H]1C[C@@H](N)CCC1)O                                     | AGTTCTG  |
| 85  | O=C([C@H]1[C@H](N)CCCC1)O                                      | CTATGAA  |
| 86  | O=C([C@H]1[C@@H](N)CCCC1)O                                     | ATCCACG  |
| 87  | C(COCCN)C(=O)O                                                 | TCACGGT  |
| 88  | C(CC(=O)O)CN                                                   | CACCGAC  |
| 89  | O=C(O)CC(C)(C)CN                                               | AACTGGA  |
| 90  | C1=CC(=CC=C1C(=O)O)OCCN                                        | TCAAGAT  |
| 91  | O=C(O)C1=CC=CC(CN)=C1                                          | TGTGTAT  |
| 92  | C1=CC=C2C(=C1)C(C3=CC=CC=C32)COC(=O)NCC4=CC=C(C=C4)C(=O)O      | ACAATCG  |
| 93  | O=C([C@H]1[C@@H](N)OCC1)O                                      | AAGCAAT  |
| 94  | C1=CC(=CC=C1C(=O)O)N                                           | GTAGCAG  |
| 95  | O=C(O)C(N)C1(C2)CC2(C(F)(F)F)C1                                | TGGCCTC  |
| 96  | C1=CC=C(C=C1)CC(C(=O)NCC(=O)O)N                                | GATAACT  |
| 97  | O=C(O)CNC([C@H](N)CC1=CSC=N1)=O                                | CGGTCAT  |
| 98  | C(CC(=O)N)[C@@H](C(=O)NCC(=O)O)N                               | CATAAGT  |
| 99  | C[C@@H](C(O)=O)NC([C@@H](CC(C)C)N)=O                           | ACGCGAT  |
| 100 | C[C@@H](C(O)=O)NC([C@H](N)CCCC)=O                              | CATAGGA  |
| 101 | C[C@@H](C(O)=O)NC([C@@H](N)CC1=CSC=N1)=O                       | TAATGGT  |
| 102 | CC(C)C[C@@H](C(=O)O)NC(=O)[C@H](C(C)C)N                        | AGCTCGC  |
| 103 | CC(C)C[C@@H](C(O)=O)NC([C@H](CCCCNC(C)=O)N)=O                  | CCTTGAC  |
| 104 | CC(C)C[C@@H](C(=O)O)NC(=O)[C@H](CCC(=O)N)N                     | AATCGTA  |
| 105 | C[C@H]([C@@H](C(=O)N[C@@H](C(C)C)C(=O)O)N)O                    | CACCTCT  |
| 106 | C[C@@H](C(=O)N[C@@H](C(C)C)C(=O)O)N                            | CATTGAG  |
| 107 | CC(C)[C@@H](C(O)=O)NC([C@H](N)CC#N)=O                          | TTGGTAA  |
| 108 | CC(C)[C@@H](C(O)=O)NC([C@@H](N)CC(OC)=O)=O                     | TCAGCAG  |
| 109 | O=C(O)CNC([C@@H](N)CC(OC)=O)=O                                 | TAGGTGA  |
| 110 | CC(C)C[C@@H](C(=O)N[C@@H](CC1=CC=CC=C1)C(=O)O)N                | AATACTT  |
| 111 | OC1=CC=C(C=C1)C[C@@H](C(O)=O)NC([C@@H](N)CCCNC(N)=O)=O         | GATGTCTG |
| 112 | OC1=CC=C(C=C1)C[C@@H](C(O)=O)NC([C@H](N)CC2=CC=C(C1)C=C2)=O    | ATCTTAC  |
| 113 | C1=CC=C2C(=C1)C(=CN2)C[C@@H](C(=O)O)NC(=O)[C@@H](CCC(=O)N)N    | CCTACCG  |
| 114 | C1=CC=C2C(=C1)C(=CN2)C[C@@H](C(=O)O)NC(=O)[C@H](CO)N           | TTAATTA  |
| 115 | O=C(O)[C@H](CC1=CNC2=C1C=CC=C2)NC([C@@H](N)CC3=CC=C(C1)C=C3)=O | GAGCGGT  |
| 116 | CC[C@H](C)[C@@H](C(=O)O)NC(=O)[C@H](CC(=O)N)N                  | CTCATGA  |
| 117 | CC[C@H](C)[C@@H](C(=O)O)NC(=O)[C@H]([C@@H](C)O)N               | AGAGCCG  |
| 118 | CC[C@H](C)[C@@H](C(O)=O)NC([C@@H](C)N)=O                       | GCTACTT  |
| 119 | C[C@H]([C@@H](C(=O)N[C@@H](CCC(=O)N)C(=O)O)N)O                 | GAACATA  |
| 120 | O=C(N)CC[C@@H](C(O)=O)NC([C@H](N)CC#N)=O                       | TGCCTAG  |
| 121 | O=C(N)CC[C@@H](C(O)=O)NC([C@@H](N)CC1CCCC1)=O                  | ACTAGAA  |
| 122 | CN(CC(=O)O)C(=O)CN                                             | ACAAGGC  |
| 123 | O=C(O)CN(C([C@@H](N)CCCC)=O)C                                  | TTATCCA  |
| 124 | O=C([C@@H]1N(C([C@H](CCCCNC(C)=O)N)=O)CC(F)(F)C1)O             | TGGCCAT  |
| 125 | OC1=CC=C(C=C1)C[C@@H](C(O)=O)NC([C@@H](N)CCCC)=O               | CAACAAAT |
| 126 | O=C(O)[C@@H](NC(CN)=O)CC(OC(C)C)C=O                            | GCCAGTA  |
| 127 | C[C@H](C(O)=O)NC([C@@H](CO)N)=O                                | TTCCGAC  |
| 128 | C[C@H](C(O)=O)NC([C@@H](N)CC1=CC=CN=C1)=O                      | TGACCGA  |
| 129 | C[C@H](C(=O)N[C@H](C)C(=O)O)N                                  | GTCTGAG  |
| 130 | C[C@H]([C@@H](C(=O)O)NC(=O)[C@H](C)N)O                         | GTCGTCTG |
| 131 | O=C(O)CC(N)C1=CC=C(C(C)C)C=C1                                  | GAACAGC  |
| 132 | CC(C)C[C@H](C(O)=O)NC([C@@H](CC1=CC=C(O)C=C1)N)=O              | GAAGAGT  |
| 133 | CC(C)C[C@H](C(=O)O)NC(=O)CN                                    | AACGCGT  |
| 134 | CC(C)C[C@H](C(O)=O)NC([C@@H](CC1=CC=CC=C1)N)=O                 | AATCTAG  |
| 135 | CC(C)C[C@@H](C(=O)N[C@H](C(C)C)C(=O)O)N                        | TCGACTC  |
| 136 | CC(C)[C@H](C(O)=O)NC([C@H](N)CC1=CC=CN=C1)=O                   | ACGAAGC  |
| 137 | O=C(O)[C@@H](CC1=CC=CC=C1)NC([C@H](N)CCCNC(N)=O)=O             | ATCGTGC  |
| 138 | C1=CC=C(C=C1)C[C@@H](C(=O)O)NC(=O)[C@H](CC2=CC=C(C=C2)O)N      | CGCTCTG  |
| 139 | OC1=CC=C(C=C1)C[C@H](C(O)=O)NC([C@H](C)N)=O                    | GCATCTC  |
| 140 | OC1=CC=C(C=C1)C[C@H](C(O)=O)NC([C@@H]([C@@H](O)C)N)=O          | ATGGTCTG |
| 141 | O=C(O)[C@@H](CC1=CNC2=C1C=CC=C2)NC([C@H](C(C)C)N)=O            | CAGGAGC  |
| 142 | C(CC(=O)N)[C@@H](C(=O)O)NC(=O)[C@H](CC(=O)N)N                  | GAGGCTA  |
| 143 | O=C(O)[C@H]1N(C([C@@H](CO)N)=O)CCC1                            | TGTCCAA  |
| 144 | C1C[C@@H](N(C1)C(=O)CN)C(=O)O                                  | TCTGTTC  |
| 145 | [2H]N[C@H](C)C(=O)N1CCC[C@H]1C(=O)O                            | ATCGCAT  |
| 146 | O=C([C@H]1N(C([C@H](CC2=CC=CC=C2)N)=O)C(C)(C)OC1)O             | AGCAAGT  |
| 147 | O=C([C@H]1N(C([C@H](CC(C)C)N)=O)C(C)(C)OC1)O                   | CGCGCAT  |

|     |                                                                      |         |
|-----|----------------------------------------------------------------------|---------|
| 148 | <chem>O=C([C@@H]1N(C([C@@H](C(C)C)N)=O)C(C)C)O[C@H]1C)O</chem>       | TCGGAGT |
| 149 | <chem>C1C[C@H](N(C1)C(=O)CN)C(=O)O</chem>                            | TCTCTCA |
| 150 | <chem>O=C([C@H]1N(C([C@H](C)N)=O)C(C)(C)OC1)O</chem>                 | TATTCCA |
| 151 | <chem>N[C@@H](CCCCNC(CCC1=CC=C(C2=CC=CC=C2C(F)(F)O1)=O)C(O)=O</chem> | TGGTCCT |
| 152 | NULL                                                                 | TATATCT |

#### 4.6. Step 2 Headpiece 3' (HP3) Sublibrary

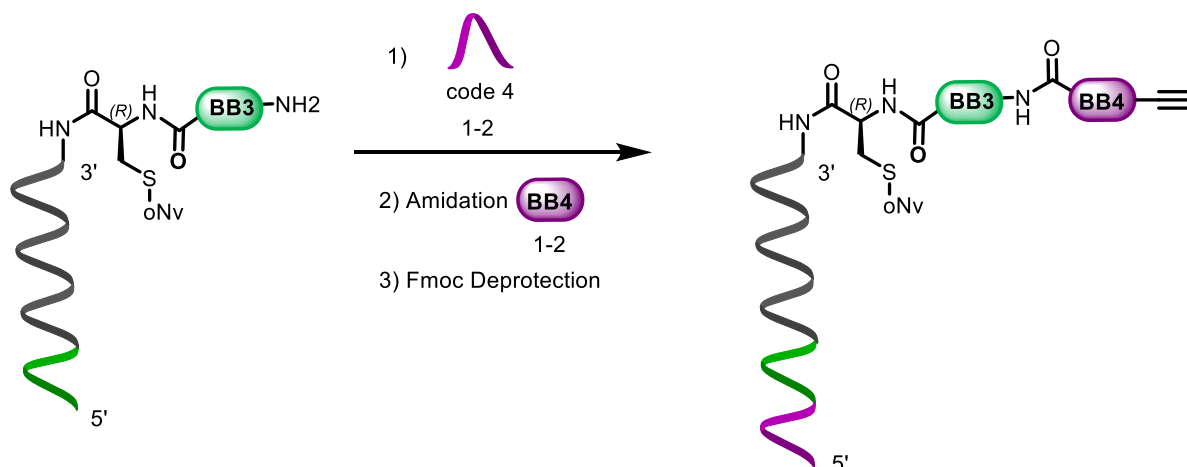

500 nmol was taken from HP3 step 1 purified pool, and divided in two. Code 4 was ligated to the pool in 5 50 nmol batches for each code performed in 2 mL Eppendorf tubes according to general procedure. After ligation completion, the conjugates were precipitated, redissolved and reacted with respective BB4 building blocks using the DMT-MM general protocol. After the reaction, the step 2 conjugates were then pooled together and treated with piperidine (conditions identical to Fmoc deprotection), in order to remove any DMT-MM capping that could have occurred during amidation. The piperidine was quenched with sodium acetate and the pool precipitated with ethanol. The HP3 step 2 pool was finally purified using 60 °C HPLC to remove excess codes/adaptor, precipitated and analyzed. A final yield of 284 nmol was obtained after purification.

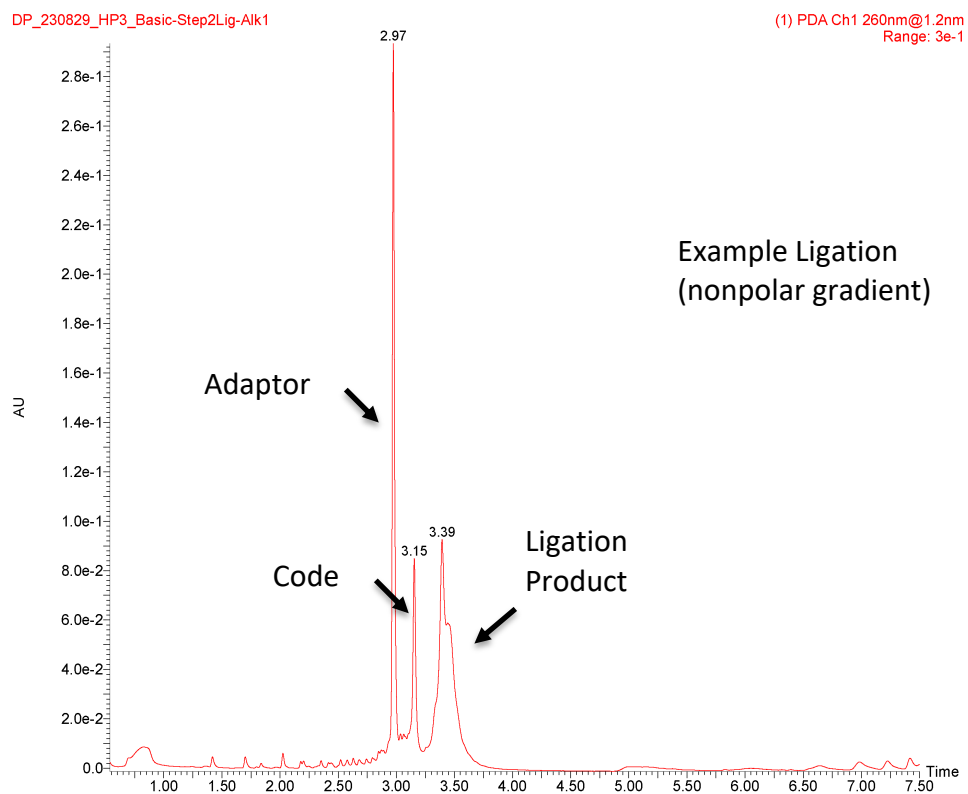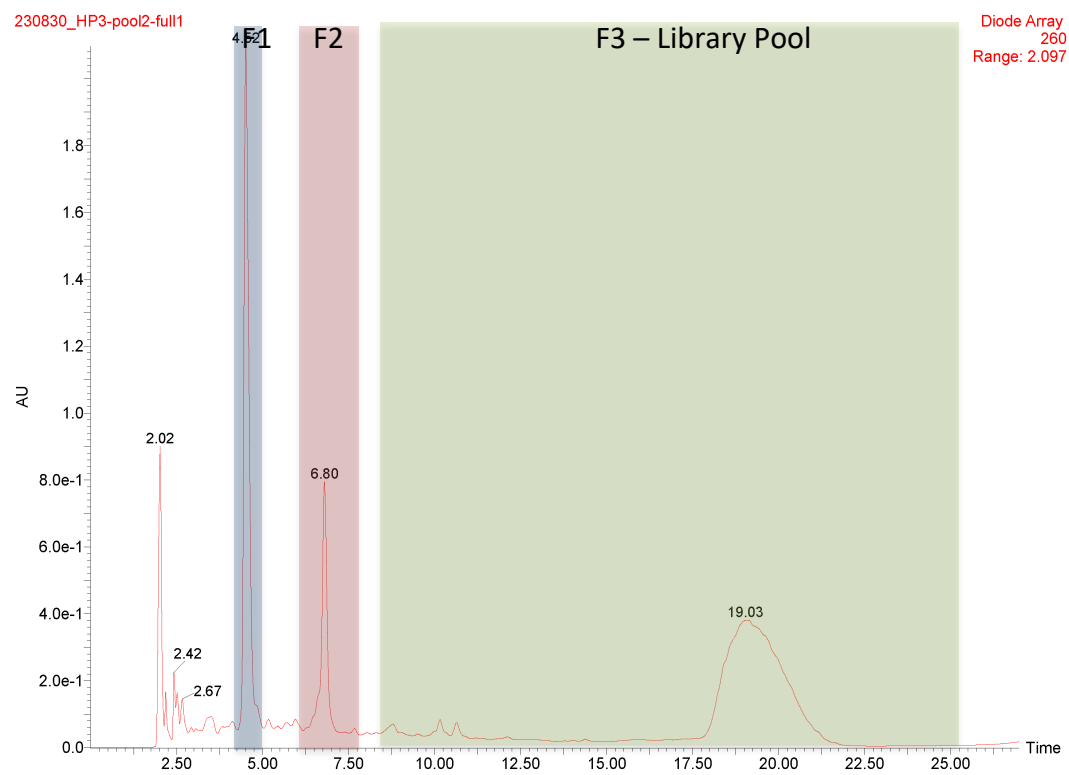

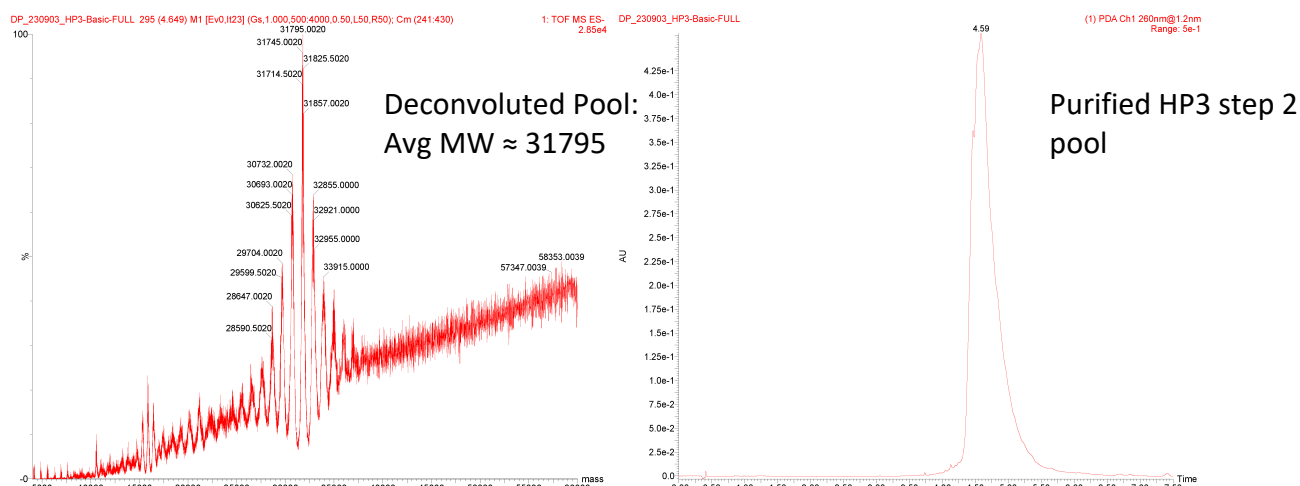

**Figure S24: Characterization of HP3 step 2 library synthesis. Top: Example ligation of code 4 onto building block 2 HP3 pool 1 conjugates. Middle: HPLC purification of library pool after finished ligation. Bottom: UV chromatogram of purified step 2 HP3 pool and MS deconvolution giving an average mass**

**Table S9: List building blocks 4 and oligonucleotide codons encoding them in the code 4 position**

| BB # | SMILES                               | Code (5'-3') |
|------|--------------------------------------|--------------|
| 1    | <chem>C#CCCC(O)=O</chem>             | CATTGCG      |
| 2    | <chem>O=C(O)[C@H]1N(CC#C)CCC1</chem> | AGTAGTC      |

#### 4.7. ESAC Library Creation & Derivatization

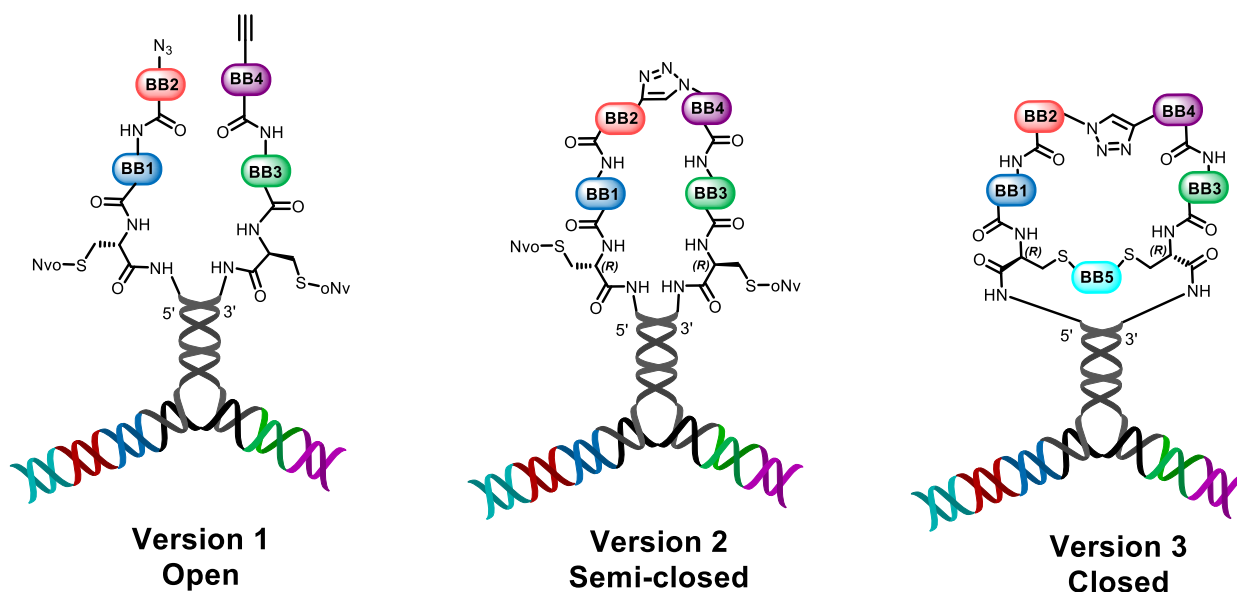

**Figure S25: Summary of different ways through which the 2 finished sub libraries were combined expressed in 3 different library versions of DP-DEL.**

A total of 3 versions of DP-DEL were generated via different combinations of the HP5 and HP3 step 2 pool sublibraries through mixing and interstrand reactions. Library versions were encoded through 6 different library terminal primers, sometimes also referred to as code 5.

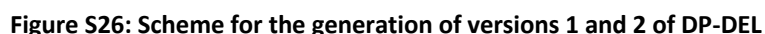

1) oNv deprotection  
in-situ oxidation  
(Part of library)  
2) Reduce disulfide  
3) S<sub>N</sub>2

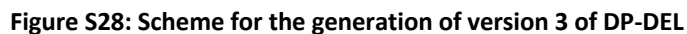

Library scaffold deprotection performed on 1 nmol scale in 1.5 mL Eppendorf tubes using unencoded version 2 (clicked) of DP-DEL. Scaffold deprotection was performed based on general protocol. Part of the library (version 3 - disulfide) was then precipitated and encoded, while the rest of the product was carried over and directly treated under thioether formation conditions as described in section 2.2 and precipitated to form electrophile derivatized versions 3 of DP-DEL.

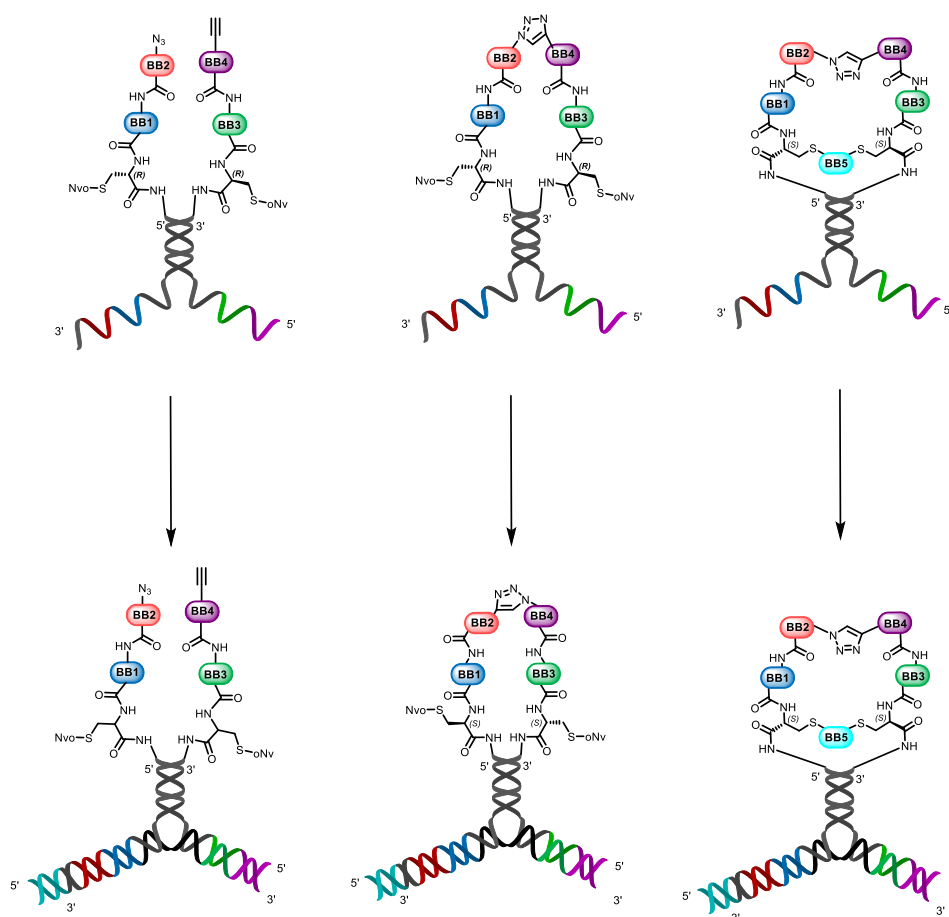

**Figure S29: Scheme for encoding of library version through the introduction of 6 different terminal primers followed by polymerization of Y-shaped encoding**

### Terminal Primer Encoding

1 nmol batches of Versions 1-3 of DP-DEL were respectively taken and encoded according to terminal Primer Installation/ Polymerization of Large encoding design protocol in section 2.2. Version 3 of the library utilized 4 different primers. After encoding, all versions of DP-DEL were pooled to generate the master library.

**Table S 10: List of library versions and oligonucleotide codons encoding them in the terminal primer position**

| BB # 5 | Library Version                             | Terminal Primer Codon (5' – 3') Selection 1 | Terminal Primer Codon (5' – 3') Selection 2 |
|--------|---------------------------------------------|---------------------------------------------|---------------------------------------------|
| 1      | Version 1 open Library                      | GGTCG                                       | -                                           |
| 2      | Version 2 clicked Library                   | ATGCT                                       | GGTCG                                       |
| 3      | Version 3 "Disulfide" Library               | ACCTA                                       | ATGCT                                       |
| 4      | Version 3 "Thioether 1" BrCC1=CC=CC(CBr)=C1 | CTCAG                                       | ACCTA                                       |
| 5      | Version 3 "Thioether 2" ClC/C=C\CCI         | TCCAG                                       | CTCAG                                       |
| 6      | Version 3 "Thioether 3" BrC/C=C/CBr         | CTCAC                                       | TCCAG                                       |

## 5. Affinity Selections

### 5.1. Selection Procedure

Affinity selections were performed according to established protocols by Decurtins et al.<sup>9</sup> using an automated KingFisher Flex magnetic particle processor. Selections were performed on two separate rounds. The first selection was performed using all 3 versions of the library with  $10^7$  copies for each compound. The second selection was performed using library versions 2-3 with  $3 \times 10^7$  copies for each compound. All selections were performed in triplicate.

### 5.2. PCR Amplification of Library

The following PCR protocol was utilized. All buffers and reagents were obtained from New England Biolabs. The number of amplification cycles were varied according to recommendations by Decurtins et al.

|                     | 50 $\mu$ L - ref | Master mix (x17) |
|---------------------|------------------|------------------|
| DNA solution        | 5                | x                |
| HF buffer           | 10               | 170.0            |
| dNTPs               | 1                | 17.0             |
| Primer a            | 2.08             | 35.4             |
| Primer b            | 2.23             | 37.9             |
| Phusion HSF         | 0.25             | 4.25             |
| mQ H <sub>2</sub> O | 29.44            | 500.5            |

- 1- 98°C-30s
- 2- 98°C-10s |
- 3- 61°C-30s |
- 4- 72°C-15s |(34x from step 2)
- 5- 72°C-5min
- 6- 4°C – pause

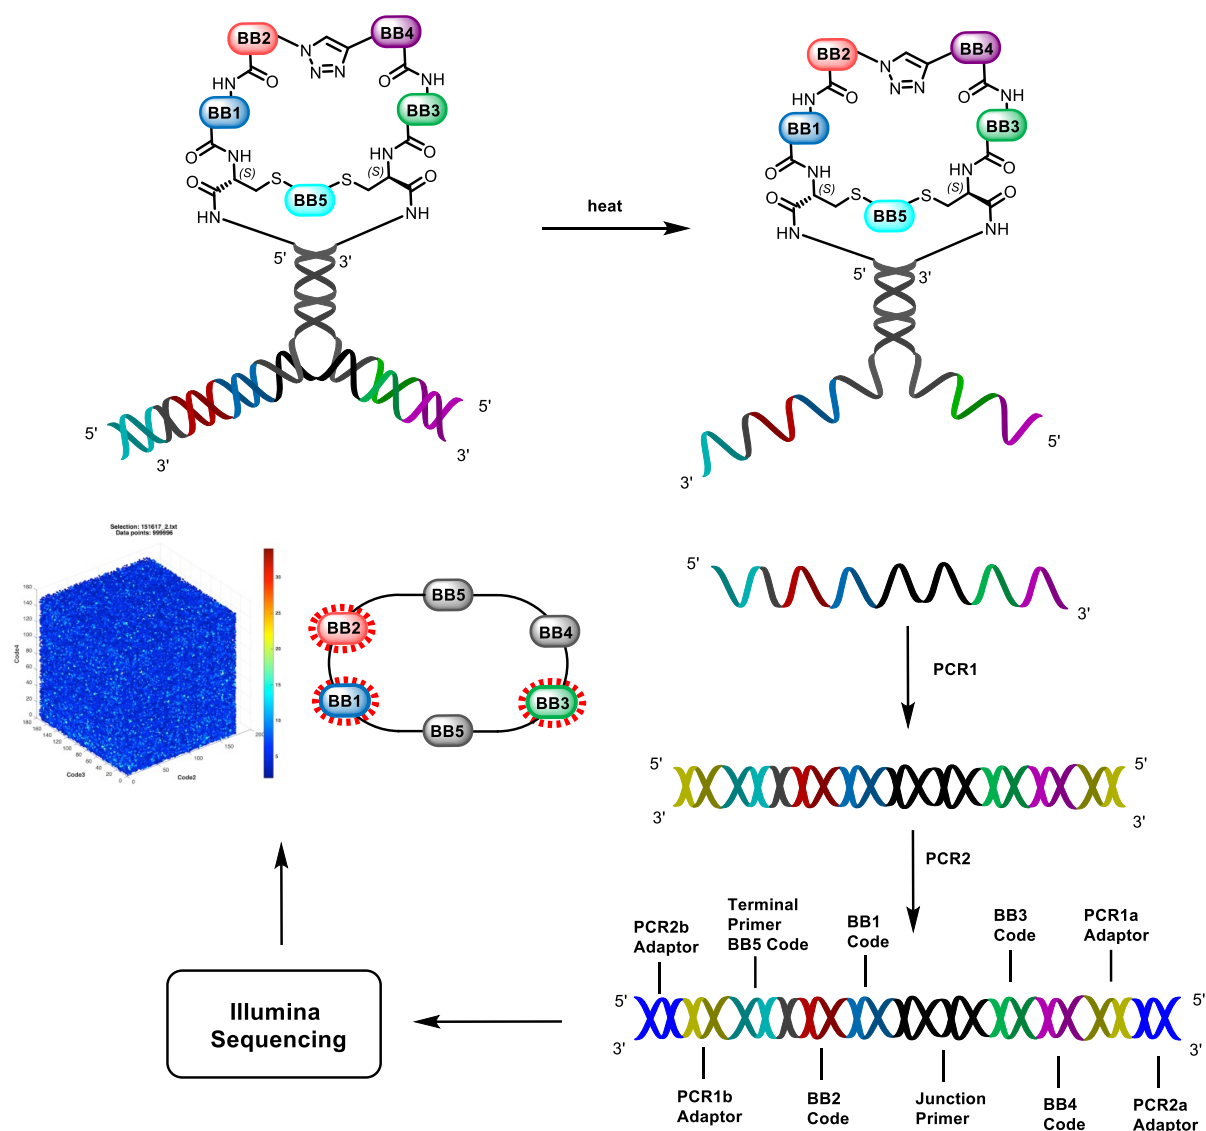

**Figure S30: Post-selection work through for library processing prior to sequencing.** After selecting the library, the Y shaped double stranded structure is disrupted by heating the library, thus releasing the complete encoding strand in a single DNA strand. This strand then multiplied and PCR1 & 2 adaptors are installed as detailed in Decurtins et al. and table S11.

## PCR2 product

5' CAAGCAGAAGACGGCATACGAGAT XXXXXXXX GTGACTGGAGTT CAG ACG TGT GCT CTT CCG XXXXX ATC TGC ATC AGT TCA TGG GTA X  
 XXX XCA GGA CCG AGT TGA C X XXX XXX GTGTGAGCAA CGTACGACAG XXX XXX G AGA GAC TAC G AGT GAC CAG TT TG AGG TGA CT  
 AGCGAGCGAA XXX XXX GTAGCCCTTC CACTCACTCA X XXX XXX CCATCGATCGTCAAGGATT CT XXXXX TC AGA TCG GAA GAG CGT CGT GT  
 GGGAAAGAGTGT XXXXXXXX GTGTAGATCTCGGTGTCGCCGTATCATT 3'

5' AAT GAT ACG GCG ACC ACC GAG ATC TAC AC XXXXXXXX ACA CTC TTT CCC TAC ACG ACG CTC TTC CGA TCT GA XXXXX AGA ATC CTT GAC  
 GAT CGA TGG X XXX XXX TGA GTG AGT GGA AGG GCT AC XXX XXX TTC GCT CGC TAG TCA CCT CAA ACT GGT CAC TCG TAG TCT CTC XXX  
 XXX CTG TCG TAC GTT GCT CAC AC X XXX XXX GTC AAC TCG GTC CTG XXX XT ACC CAT GAA CTG ATG CAG AT XXXXX CGG AAG AGC ACA  
 CGT CTG AAC TCC AGT CAC XXXXXXXX A TCT CGT ATG CCG TCT TCT GCT TG 3'

XXXXXXX – PCR2a  
 XXXXX – PCR1a  
 X XXX XXX Code 4 (HP3) BB4  
 XXX XXX Code 3 (HP3) BB3  
 XXX XXX Code 1 (HP5) BB1  
 X XXX XXX – Code 2 (HP5) BB2  
 XXX XX – Terminal Primer (Sublibrary interlinker)

XXXXX – PCR1b  
 XXXXXXXX – PCR2b

**Table S11: PCR primers used for post-selection library amplification**

|       |                                                                             |
|-------|-----------------------------------------------------------------------------|
| PCR1a | 5' TACACGACGCTCTCCGATCTGA XXXXX AGAATCCTTGACGATCGATGG 3'                    |
| PCR1b | 5' CAGACGTGTGCTCTTCCG XXXXX ATCTGCATCAGTTTCATGGGTA 3'                       |
| PCR2a | 5' AATGATACGGCGACCACCGAGATCTACAC XXXXXXXX AACTCTTCCCTACACGACGCTCTCCGATCT 3' |
| PCR2b | 5' CAAGCAGAAGACGGCATACGAGAT XXXXXXXX GTGACTGGAGTTCAGACGTGTGCTCTTCCGATC 3'   |

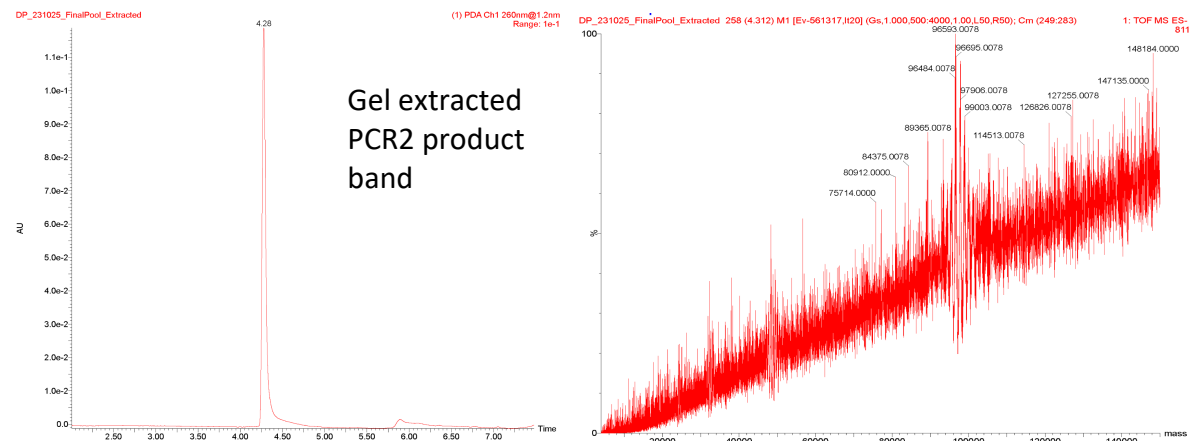

Expected PCR2 size: 313 bp  
 Around 96 kDa

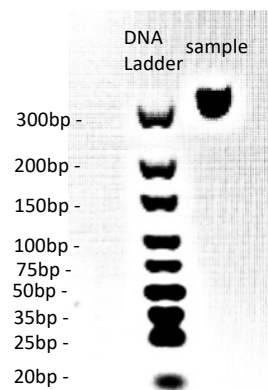

**Figure S31: LC-MS and gel-based characterization of sequencing-ready selected DP-DEL**

### 5.3. Proteins for Selections

Table S12: List of proteins used for selections

| Protein      | buffer                                                         | MW (Da)       | tag     | beads                                                  | Concentration |
|--------------|----------------------------------------------------------------|---------------|---------|--------------------------------------------------------|---------------|
| CAIX         | PBS pH 7.4                                                     | 62355 (dimer) | His-tag | HisPur Ni-NTA Magnetic Beads (ThermoFisher Scientific) | 2 $\mu$ M     |
| NSP14        | 50mM Tris-HCl, 200mM NaCl, 5% (w/v) glycerol, 0.5 mM TCEP, pH8 | 61857         | biotin  | Dynabeads™ MyOne™ Streptavidin C1 (Invitrogen)         |               |
| Thrombin     | aqueous buffer of pH 6.0                                       | 36700         | biotin  |                                                        |               |
| PLAP         | PBS pH 7.4                                                     | 52745         | biotin  |                                                        |               |
| Streptavidin | PBS pH 7.4                                                     | -             | -       |                                                        | -             |

#### 5.3.1. CAIX

The extracellular domain of human carbonic anhydrase IX (120-397) with a C-terminal hexahistidine-tag was produced according to procedure described in the Ahlskog et al. 2009

10

#### 5.3.2. NSP14

The bacterial expression plasmid was kindly provided by the group of Prof. Nenad Ban at ETH Zürich. The protein was expressed for 20h at 16°C in a commercially available *E. Coli* BL21(DE3) strain carrying a second plasmid for in-vivo site-specific biotinylation (CVB-T7 POL, Avidity L.L.C.). Cleared cell-lysate was obtained by snap-freezing, sonication and ultracentrifugation. The protein was purified subsequently by Ni-NTA affinity chromatography and a Heparin column. Eluates were pooled and incubated for 1h at 30°C with 50 ug of SUMO protease ulp1 per mg of target protein to cleave His14-SUMO-nsp14 fusion protein. Final nsp14 was purified by reverse Ni-NTA affinity chromatography and desalted and concentrated by centrifugal filter. The functionality of the protein was assessed by SDS-PAGE and by an exonuclease activity assay

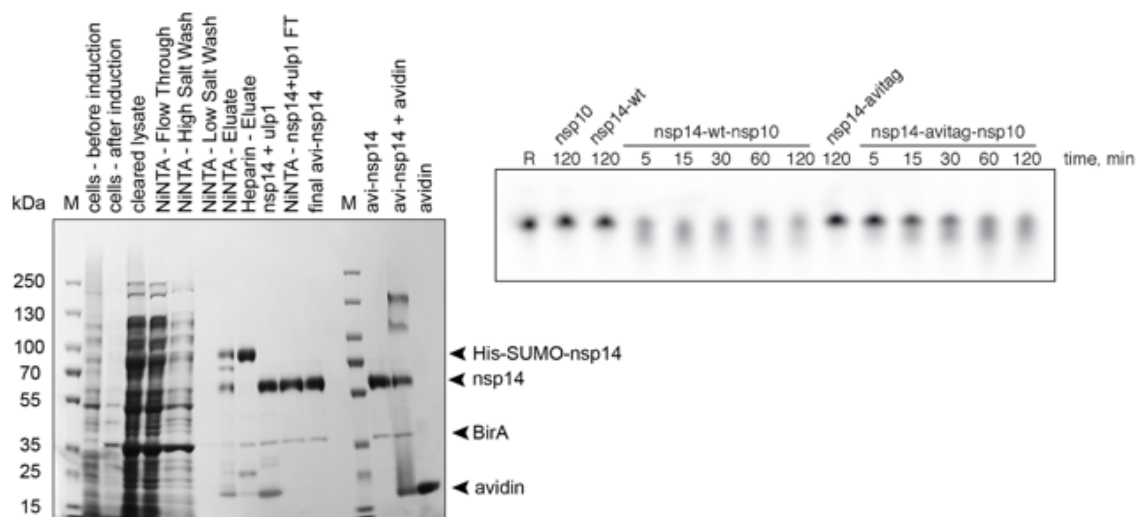

### 5.3.3. Thrombin

Human alpha-thrombin was obtained from Prolytix (Haematologic Technologies) - BioConnect Website and used in FP and inhibition assays. Biotinylated thrombin used for selections was obtained from Sigma Aldrich.

### 5.3.4. PLAP

The recombinant human placental alkaline phosphatase (hPLAP) labelled with AviTag™ and 6xHis-tag was produced in Chinese hamster ovary (CHO) cells and was purified by Ni-NTA affinity chromatography and size-exclusion chromatography. The *in-vitro* biotinylation of the protein is mediated by BirA protein system. “Early-fraction” is the final material used for fluorescence polarization and inhibition experiments.

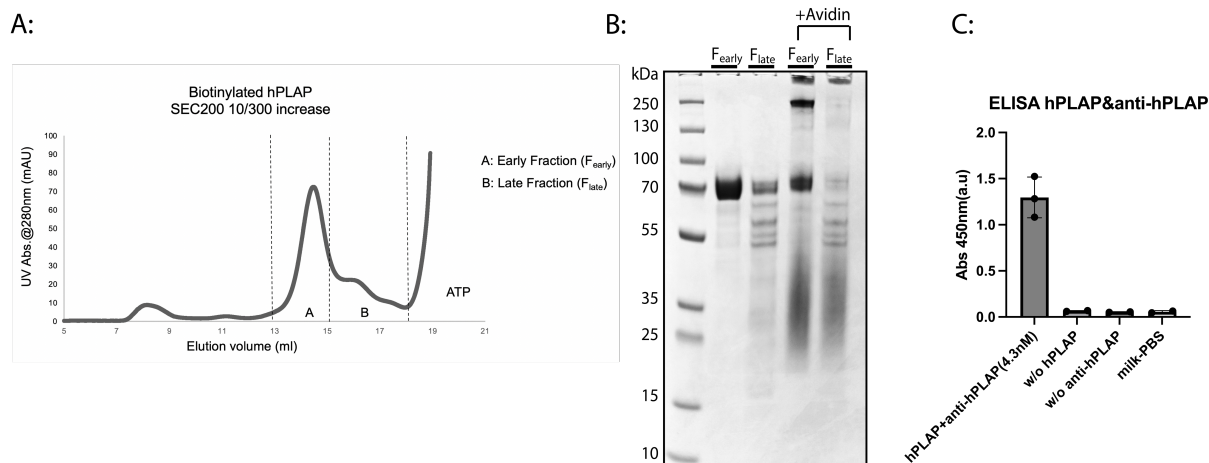

**Figure S32: Quality characterization of recombinant hPLAP.** A. The size exclusion chromatogram of purifying recombinant hPLAP expressed in CHO cells after Ni-NTA affinity chromatography purification and biotinylation. B. SDS-Page gel electrophoresis analysis of early fractions ( $F_{early}$ ) and late fractions ( $F_{late}$ ) from size exclusion chromatography with or without adding avidin. V. Qualitative ELISA to verify the recombinant hPLAP is able to bind with human PLAP antibody. The absorbances at 450nm were measured with/without the presence of hPLAP and/or human PLAP antibody. Figure adapted from Cai, J. (2023). *A novel dual-display DNA-encoded library for ligand discovery of tumor-associated antigens* [Unpublished master's thesis]. ETH Zurich.

## 5.4. Sequencing Fingerprints Analysis

### 5.4.1. Notes of Fingerprint Analysis

For easier visual interpretation, the counts of each replicate experiment were normalized and concatenated using a python script shown below. The concatenated results were used to generate the visual graphs shown in all main figures and fingerprints shown below. Enrichment factors were still calculated based per each individual experiment.

Code combinations are listed in the order they are read during sequencing, starting from PCR2a side. This means the 5 code combinations are listed as: (code4, code3, code1, code2, code5) in that order. When a code is entered as 0, this means a code is disregarded. Ex. 0;176;175;0;0 means the counts of all members are shown that possess code3-176 and code1-175 regardless of what other codes these members possess.

Results from first selection round are shown for Naive library, CAIX, NSP14 and version 1 of Thrombin, Streptavidin and PLAP. Results from second selection round are shown for Thrombin, Streptavidin, PLAP and naïve library.

Python script:

```
import pandas as pd

# Load data from the three text files into DataFrames
data1 =
pd.read_csv('/Users/dimitar.petrov/PycharmProjects/pythonProject1/selection
_12_2_.txt', delimiter='\t') # Adjust the delimiter as needed
data2 =
pd.read_csv('/Users/dimitar.petrov/PycharmProjects/pythonProject1/selection
_13_2_.txt', delimiter='\t')
data3 =
pd.read_csv('/Users/dimitar.petrov/PycharmProjects/pythonProject1/selection
_14_2_.txt', delimiter='\t')

# Function to normalize counts in each document to a certain value
def normalize_counts(data):
    total_count = data['Count'].sum()
    scaling_factor = 3000000 / total_count # Calculate the scaling factor
    data['Count'] = data['Count'] * scaling_factor # Scale the counts
    return data

# Normalize counts in each dataset
data1 = normalize_counts(data1)
data2 = normalize_counts(data2)
data3 = normalize_counts(data3)

# Concatenate the three DataFrames
combined_data = pd.concat([data1, data2, data3], ignore_index=True)

# Reorder the columns so that 'Count' is the rightmost column
combined_data = combined_data[['Count', 'Code1', 'Code2', 'Code3', 'Code4',
'Code5']]

# Group by 'Code1', 'Code2', and 'Code3' and sum the 'Count' column
result = combined_data.groupby(['Code1', 'Code2', 'Code3', 'Code4',
'Code5'])['Count'].sum().reset_index()
```

```
# Reorder the columns so that 'Count' is the leftmost column
result = result[['Count', 'Code1', 'Code2', 'Code3', 'Code4', 'Code5']]

# Write the result to a new text file
result.to_csv('selection_121314_2.txt', sep='\t', index=False) # Adjust
the delimiter as needed
```

Script was generated with help from ChatGPT (OpenAI)

### Equations for Enrichment Calculation

$$TC_s = \sum_{i=1}^{175} \sum_{j=1}^{152} \sum_{k=1}^{176} \sum_{l=1}^2 \sum_{m=1}^6 SC_s (code1_i, code2_j, code3_k, code4_l, code5_m)$$

$$AC_s = \frac{TC_s}{i * j * k * l * m}$$

$$EF = \frac{SC_s (code1_i, code2_j, code3_k, code4_l, code5_m)}{AC_s}$$

**Equation 1:** Total counts (TC) are given for a specific selection *s*, where the letters i-m define the number of codes 1-5. Sequence counts (SC) are generated for each code combination based on illumina sequencing output. Average counts (AC) define the average number of counts each code combination should have assuming equal distribution of total counts. Enrichment factor (EF) is calculated for a specific code combination using its sequence and average counts.

### 5.4.2. Statistical Analysis

**Table S13:** Statistical evaluation of selection hit outcomes. Calculations are done based on given formulas in Equation 1. When certain codes are disregarded for certain combinations such as CAIX and NSP14, EF are calculated based on the correspondingly reduced number of members. The same is correspondingly done for hits enriched from selection 2 of the library (thrombin & streptavidin) where the open library (0;0;0;0;1) was not tested in selection

| Replicate | Target     | Combination   | Average Counts<br>(All codes) | Total Counts | Enrichment factor |
|-----------|------------|---------------|-------------------------------|--------------|-------------------|
| 1         | Naive/None | -             | 0.0353104                     | 1983710      | -                 |
| 2         | Naive/None | -             | 0.0305264                     | 1714951      | -                 |
| 3         | Naive/None | -             | 0.0274994                     | 1544897      | -                 |
| 1         | CAIX       | 0;176;175;0;0 | 0.0345913                     | 1943309      | 376               |
| 2         | CAIX       | 0;176;175;0;0 | 0.0320322                     | 1799542      | 283               |
| 3         | CAIX       | 0;176;175;0;0 | 0.0317683                     | 1784718      | 205               |
| 1         | NSP14      | 0;137;119;0;0 | 0.026666                      | 1498072      | 16                |
| 2         | NSP14      | 0;137;119;0;0 | 0.0298615                     | 1677593      | 14                |
| 3         | NSP14      | 0;137;119;0;0 | 0.0288461                     | 1620553      | 19.2              |
| 1         | PLAP       | 2;16;81;47;1  | 0.0253397                     | 1423566      | 632               |
|           |            | 2;16;79;47;1  |                               |              | 591               |
|           |            | 1;91;78;96;1  |                               |              | 788               |

|   |              |               |            |         |      |
|---|--------------|---------------|------------|---------|------|
| 2 | PLAP         | 2;16;81;47;1  | 0.0289435  | 1626025 | 553  |
|   |              | 2;16;79;47;1  |            |         | 553  |
|   |              | 1;91;78;96;1  |            |         | 553  |
| 3 | PLAP         | 2;16;81;47;1  | 0.0358198  | 2012325 | 837  |
|   |              | 2;16;79;47;1  |            |         | 418  |
|   |              | 1;91;78;96;1  |            |         | 642  |
| 1 | Thrombin     | 2;84;150;56;2 | 0.0155248  | 726813  | 3419 |
|   |              | 2;84;148;56;2 |            |         | 2580 |
|   |              | 2;35;78;112;2 |            |         | 2322 |
| 2 | Thrombin     | 2;84;150;56;2 | 0.0125530  | 587684  | 3166 |
|   |              | 2;84;148;56;2 |            |         | 1333 |
|   |              | 2;35;78;112;2 |            |         | 3250 |
| 3 | Thrombin     | 2;84;150;56;2 | 0.0121638  | 569463  | 4166 |
|   |              | 2;84;148;56;2 |            |         | 3833 |
|   |              | 2;35;78;112;2 |            |         | 1000 |
| 1 | Streptavidin | 2;28;34;26;2  | 0.01618474 | 757705  | 6687 |
|   |              | 2;28;34;8;2   |            |         | 5500 |
| 2 | Streptavidin | 2;28;34;26;2  | 0.0178301  | 834737  | 7022 |
|   |              | 2;28;34;8;2   |            |         | 6011 |
| 3 | Streptavidin | 2;28;34;26;2  | 0.0144361  | 675844  | 5625 |
|   |              | 2;28;34;8;2   |            |         | 2847 |

**Table S14: Statistical evaluation of selection hit outcomes compared between 3 library cyclization versions. Calculations are done based on given formulas in Equation 1. Results are shown as average enrichment factors over 3 replicate experiments with standard deviation shown between the 3 results.**

| Target                   | Combination     | Average Enrichment factor | STDEV between Replicates |
|--------------------------|-----------------|---------------------------|--------------------------|
| Streptavidin open        | 2;28;34;26;1    | 14                        | 20                       |
|                          | 2;28;34;8;1     | 68                        | 68                       |
| Streptavidin semi-closed | 2;28;34;26;2    | 6444                      | 595                      |
|                          | 2;28;34;8;2     | 4786                      | 1386                     |
| Streptavidin closed      | 2;28;34;26;3-6  | 190                       | 101                      |
|                          | 2;28;34;8;3-6   | 621                       | 448                      |
| PLAP open                | 2;16;81;47;1    | 674                       | 119                      |
|                          | 2;16;79;47;1    | 520                       | 74                       |
|                          | 1;91;78;96;1    | 661                       | 96                       |
| PLAP semi-closed         | 2;16;81;47;2    | 966                       | 705                      |
|                          | 2;16;79;47;2    | 251                       | 354                      |
|                          | 1;91;78;96;2    | 135                       | 121                      |
| PLAP closed              | 2;16;81;47;3-6  | 23                        | 32                       |
|                          | 2;16;79;47;3-6  | 82                        | 59                       |
|                          | 1;91;78;96;3-6  | 0                         | 0                        |
| Thrombin open            | 2;84;150;56;1   | 0                         | 0                        |
|                          | 2;84;148;56;1   | 12                        | 6                        |
|                          | 2;35;78;112;1   | 0                         | 0                        |
| Thrombin semi-closed     | 2;84;150;56;2   | 3583                      | 424                      |
|                          | 2;84;148;56;2   | 2580                      | 1020                     |
|                          | 2;35;78;112;2   | 2190                      | 923                      |
| Thrombin closed          | 2;84;150;56;3-6 | 130                       | 104                      |
|                          | 2;84;148;56;3-6 | 91                        | 79                       |
|                          | 2;35;78;112;3-6 | 53                        | 75                       |

### 5.4.3. Library Fingerprints

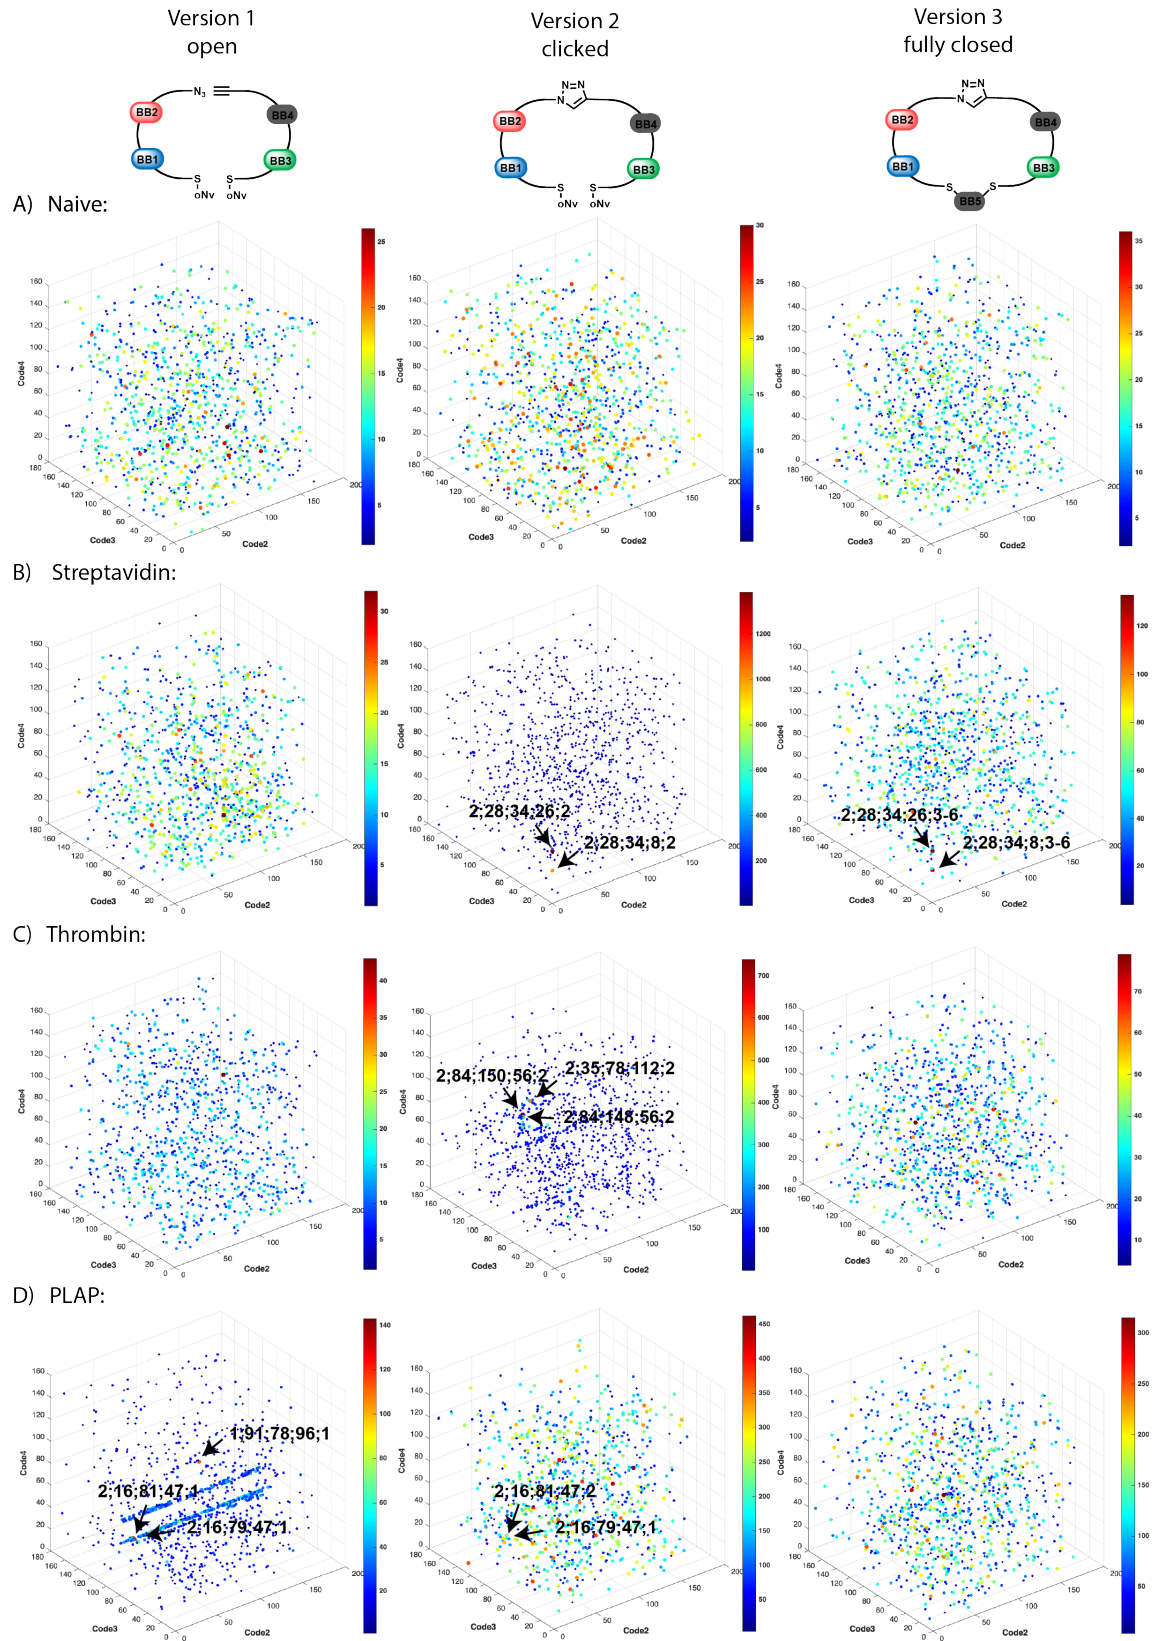

**Figure S33: Fingerprints of Naïve library and all non-control selections for concatenated triplicates. Fingerprints show the distinguishing characteristics for different library versions for all proteins. Version 1 fingerprints are taken from selection 1, while version 2-3 selection for A-D are taken from selection 2. Setting max 1000 points per graph.**

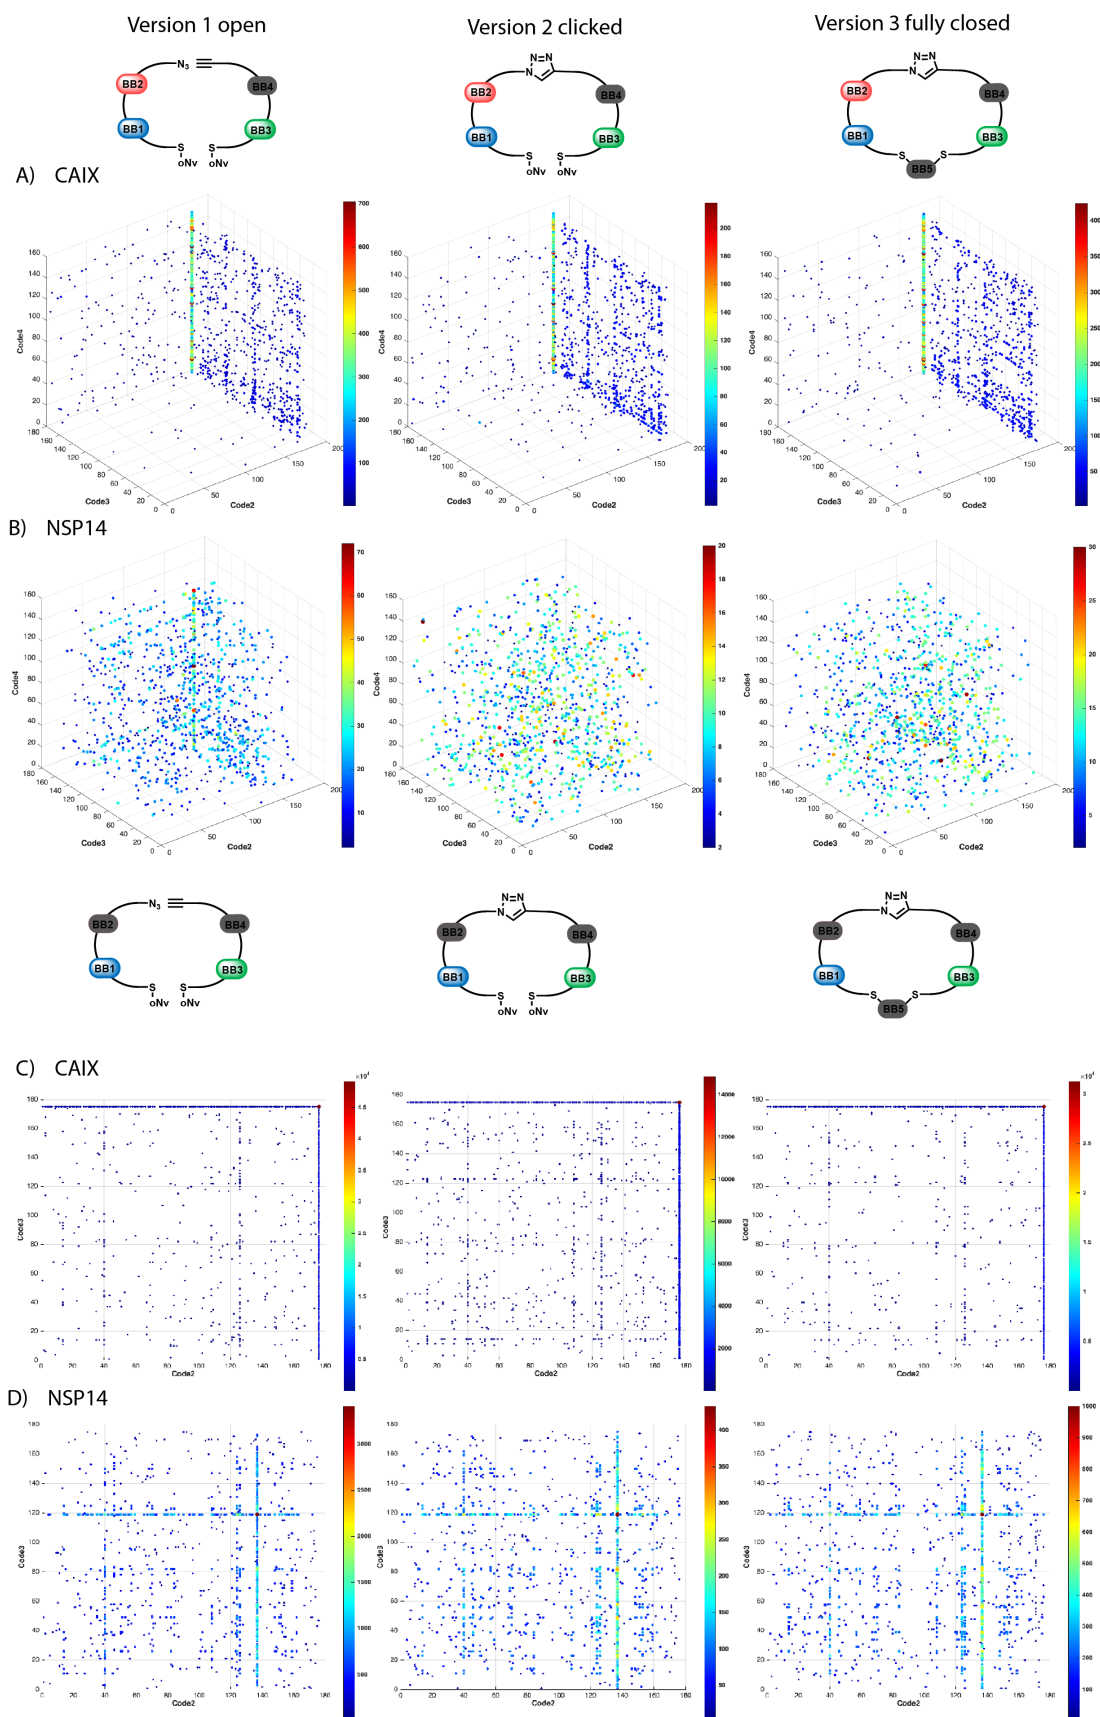

**Figure S34: Fingerprints displaying positive control selections displaying different library versions in a 3 BB configuration as well as in 2 building block configurations for the 2 building block positions where the positive control was installed. All fingerprints are from selection 1. Setting max 1000 points per graph.**

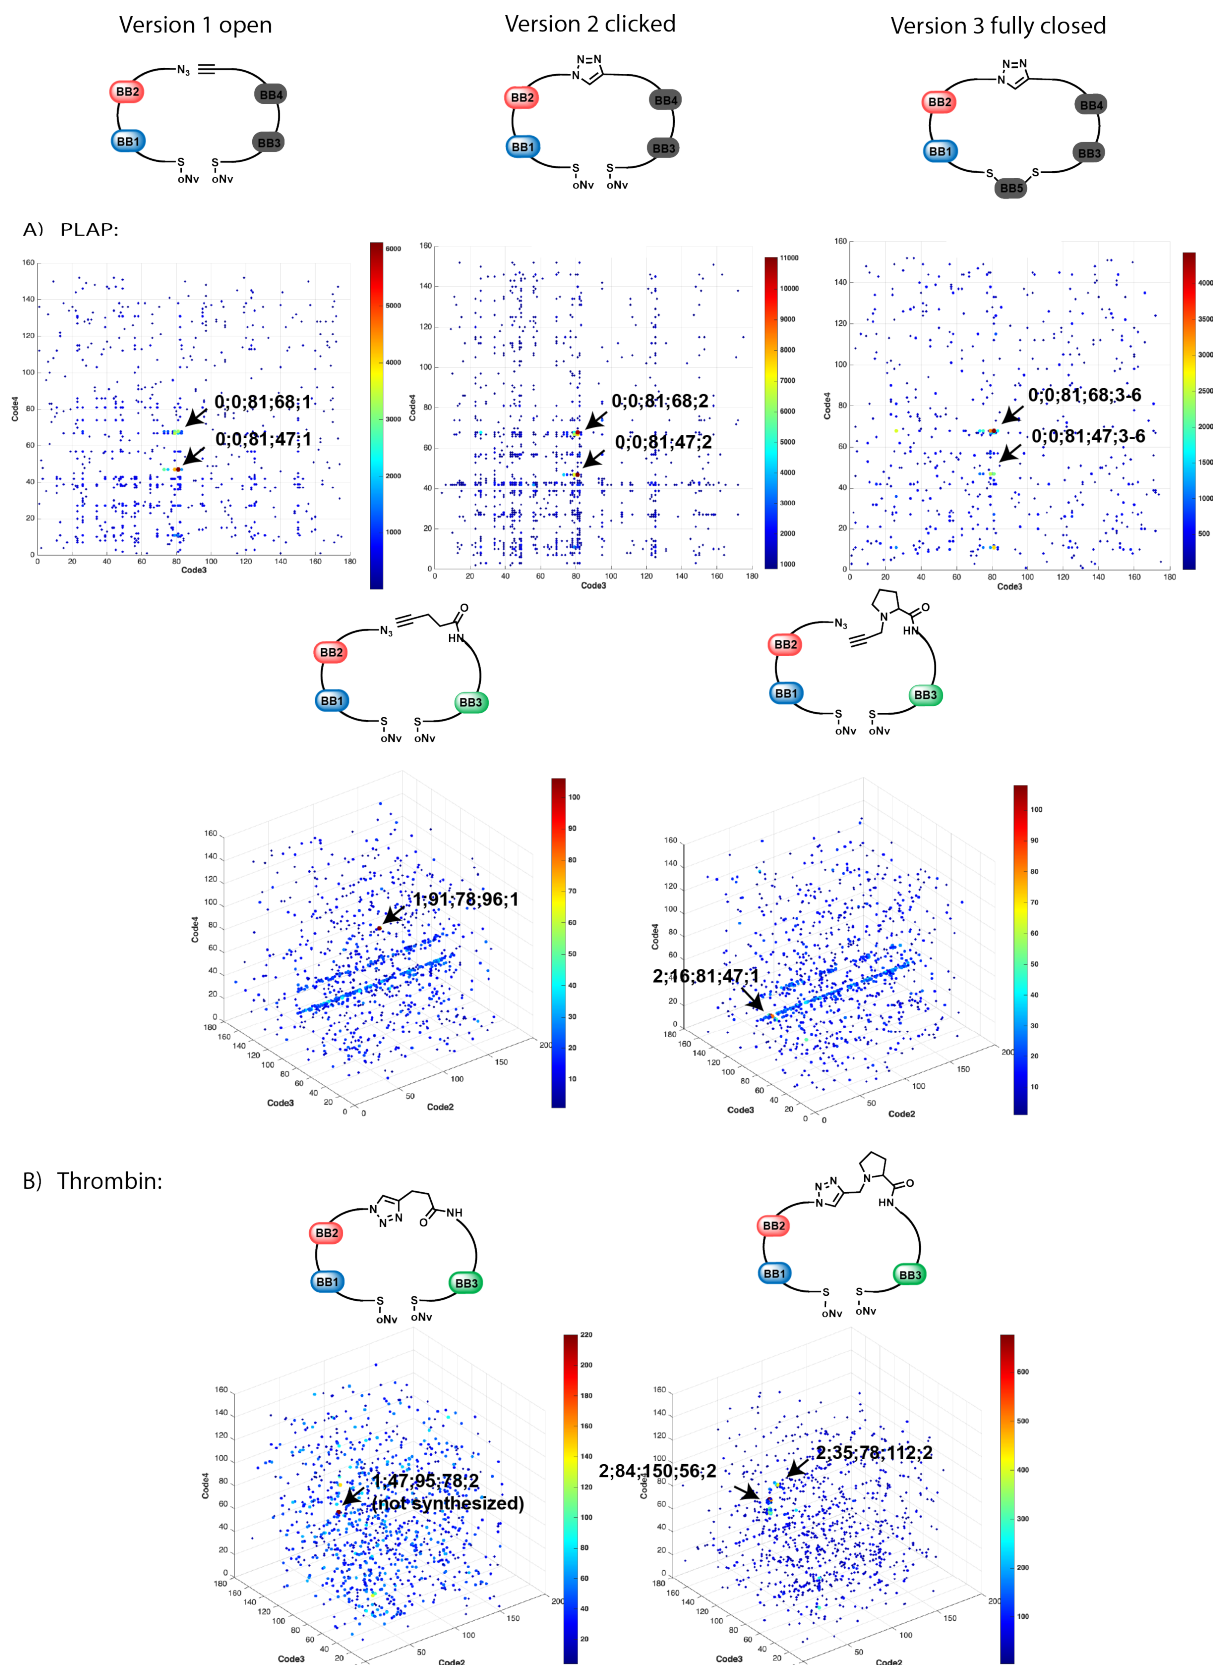

**Figure S35: Concatenated triplicate fingerprints showing the 2-BB plane for the major contributing building block positions for the PLAP binder in different library versions. For thrombin different fingerprints are shown according to different selection of BB4 for version 2 of the library. Version 1 fingerprints are taken from selection 1, while version 2-3 selection are taken from selection 2. Setting max 1000 points per graph.**

## 6. Hit Resynthesis

### 6.1. On-LNA Hit Resynthesis

**Table S15: Locked nucleic acid (LNA) sequences used for on-LNA initial hit validation via fluorescence polarization**

| Name | Sequence                         | Mass (Da) |
|------|----------------------------------|-----------|
| LNA5 | 5'-(Fluorescein dT) AG TAG CC-3' | 3322      |
| LNA3 | d 5'-GG CTA CTA-3'               | 2839      |

The sequences of two complementary LNAs used for hit resynthesis are given in table S15. The LNA5 strand aimed to approximate the HP5 sublibrary during hit resynthesis and the LNA3 the HP3 sublibrary respectively. Scaffold attachment and acetylation of the amino functionality of both strands was performed using the scaffold coupling procedure in section 2.2, scaled down to 50 nmol batches. Acetylated LNA5/LNA3 were used as negative controls during hit resynthesis.

Hit conjugates for PLAP, Thrombin and Streptavidin were synthesized using general procedures on a 50 nmol scale per conjugate. Synthesized LNA conjugates were HPLC purified and precipitated.

If LNA5 and LNA3 conjugates had to participate in an interstrand click reaction, 0.5 nmol of each strand were mixed and the click reaction was performed as described in section 2.2. The reaction was then precipitated, redissolved in 500  $\mu$ L mQ and centrifuged using an Amicon® Ultra Centrifugal Filter, 3 kDa. The concentrated conjugates were rediluted in mQ and the procedure was repeated 2-3 times in order to remove smaller contaminants.

### 6.1.1. Negative Control and Scaffold Attachment

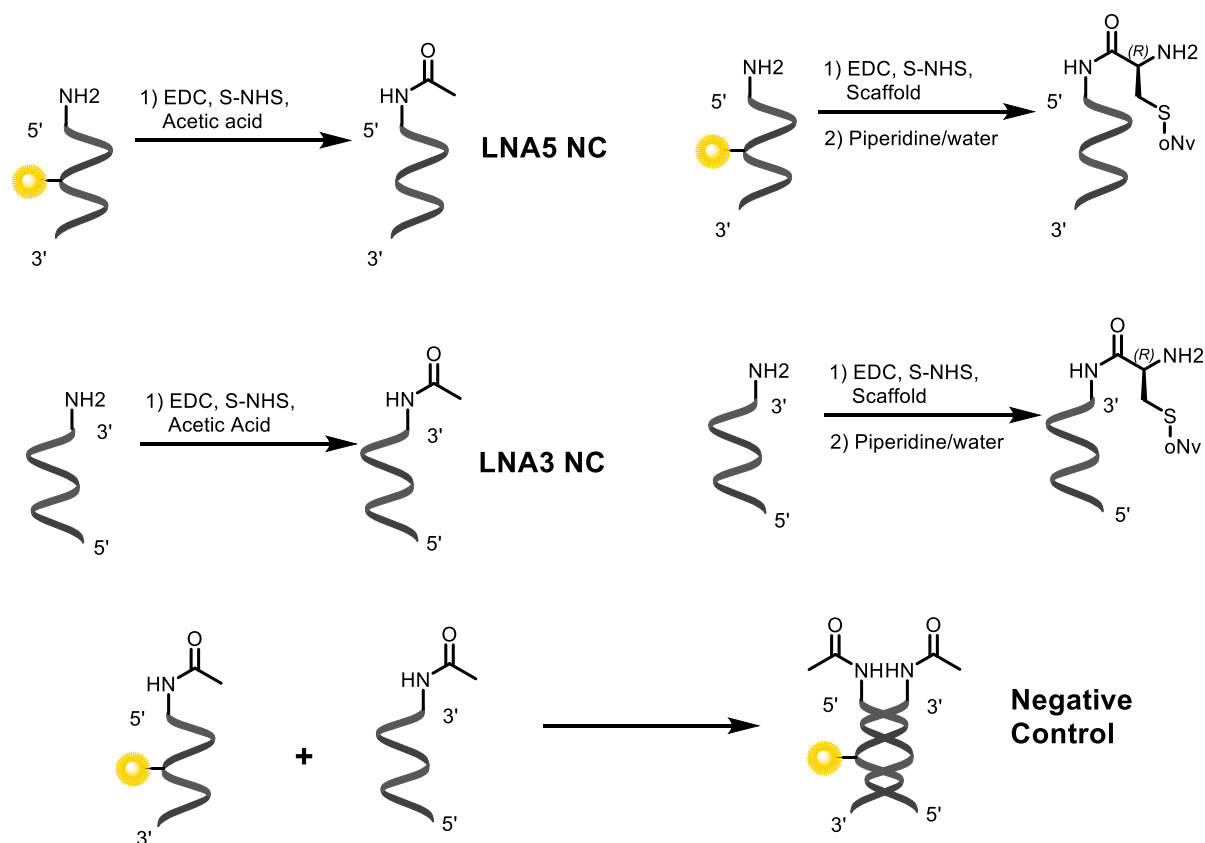

**Figure S36: Scaffold attachment scheme and negative control synthesis scheme for LNA conjugates**

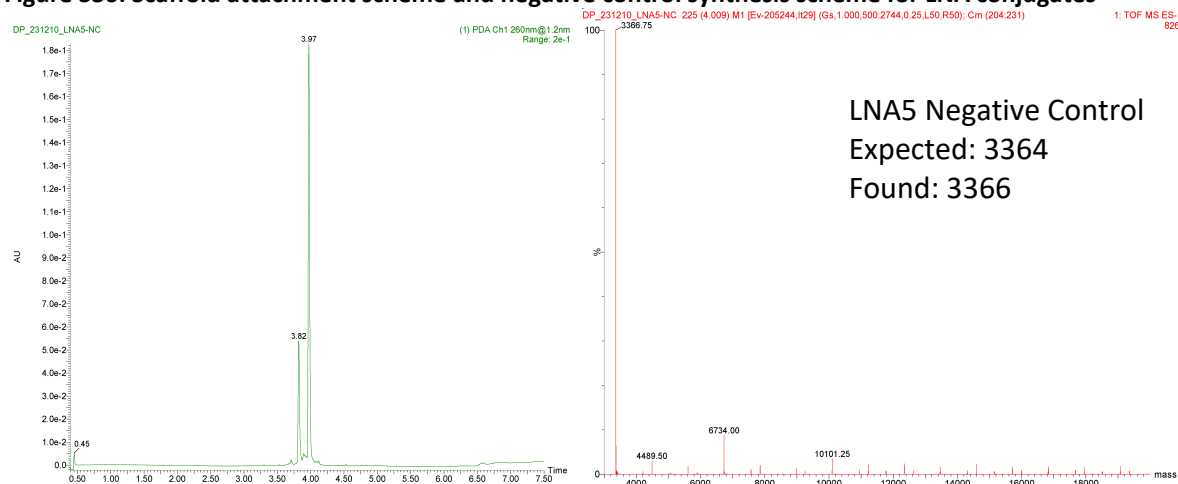

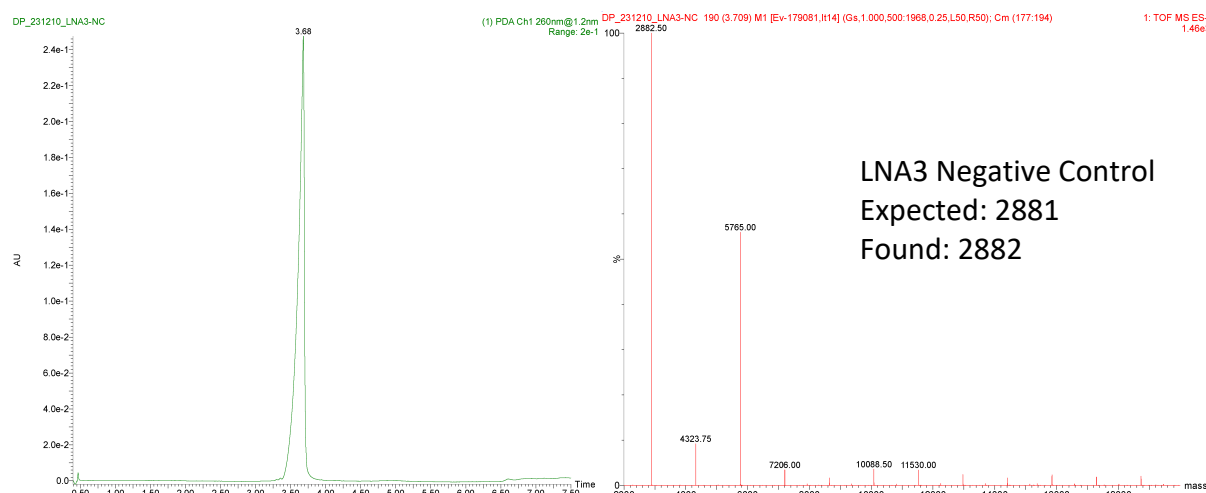

Figure S37: LC-MS chromatogram (left) and the corresponding deconvoluted MS spectra (right) of synthesized LNA3 negative controls

### 6.1.2. PLAP

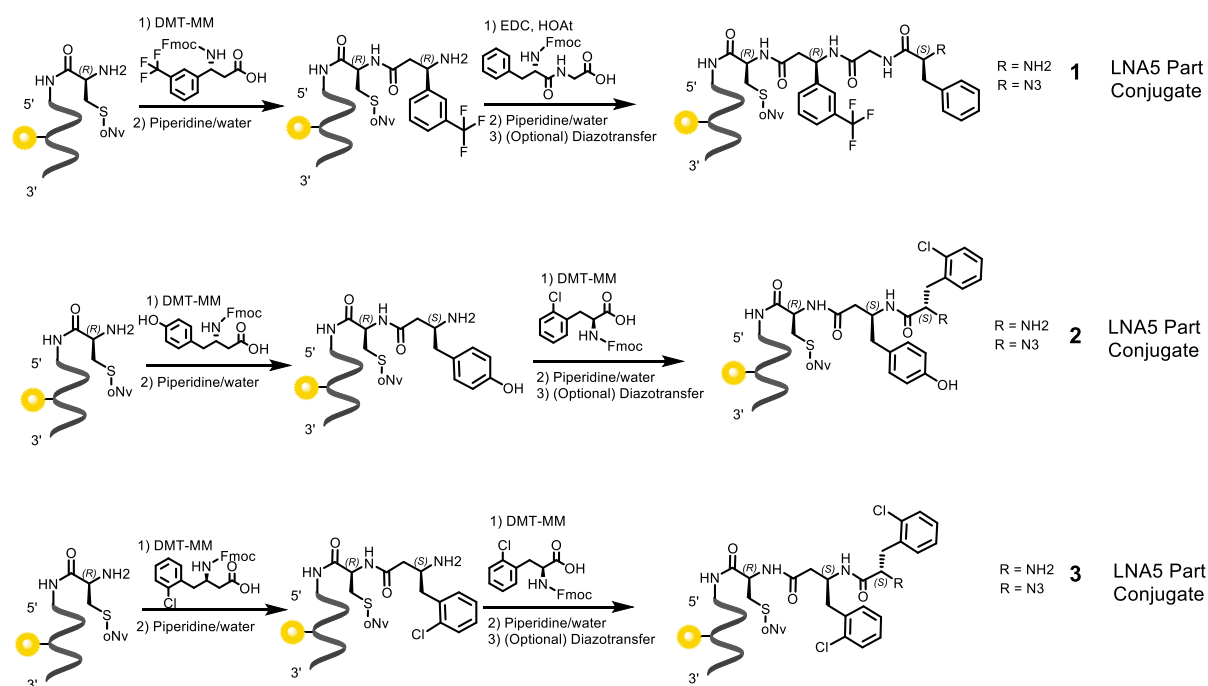

Figure S38: Resynthesis scheme of identified PLAP hits 1-3 on LNA5 strand.

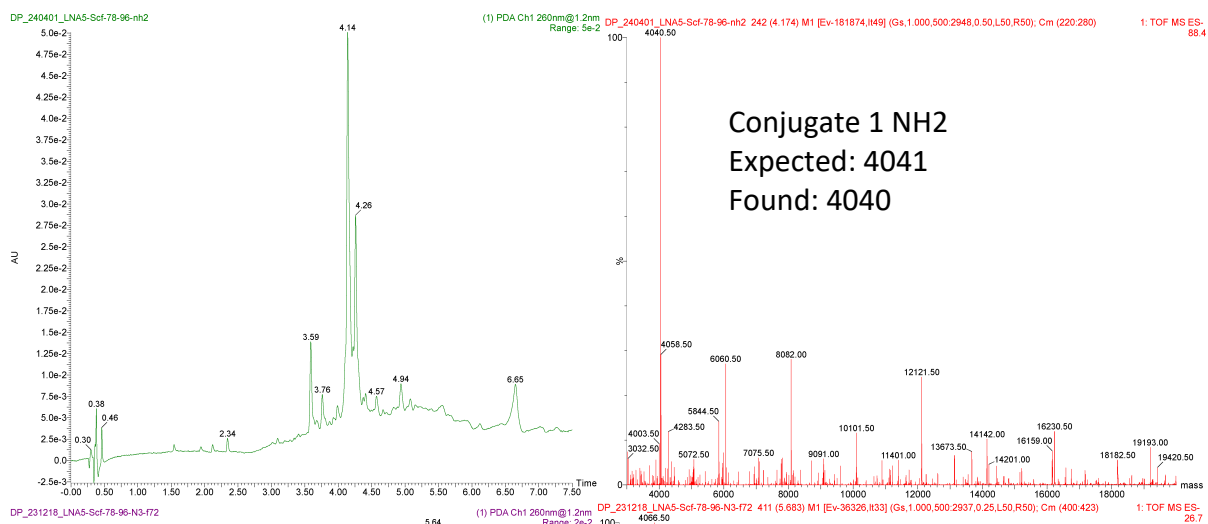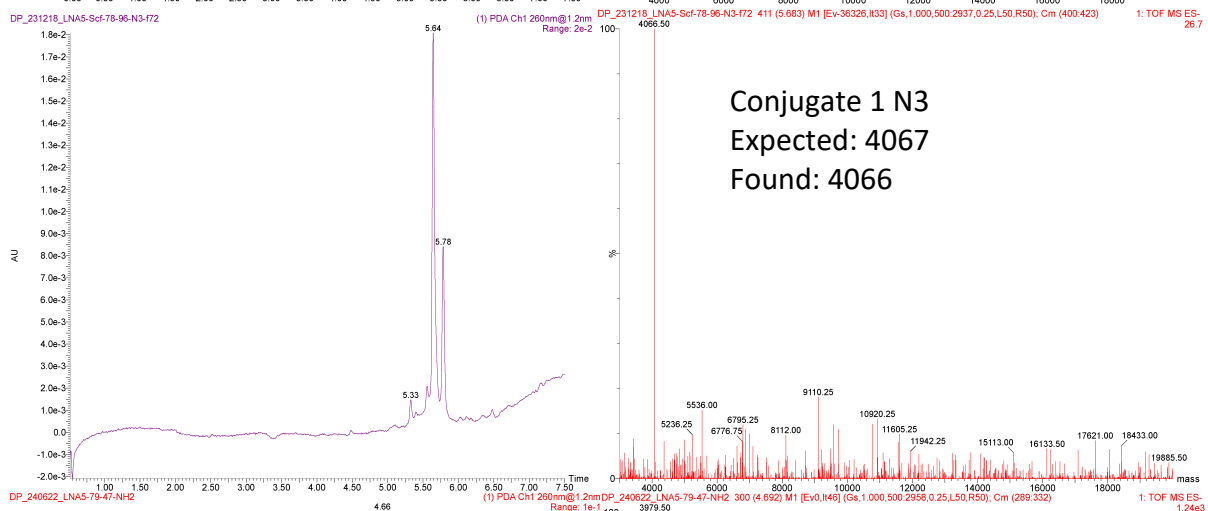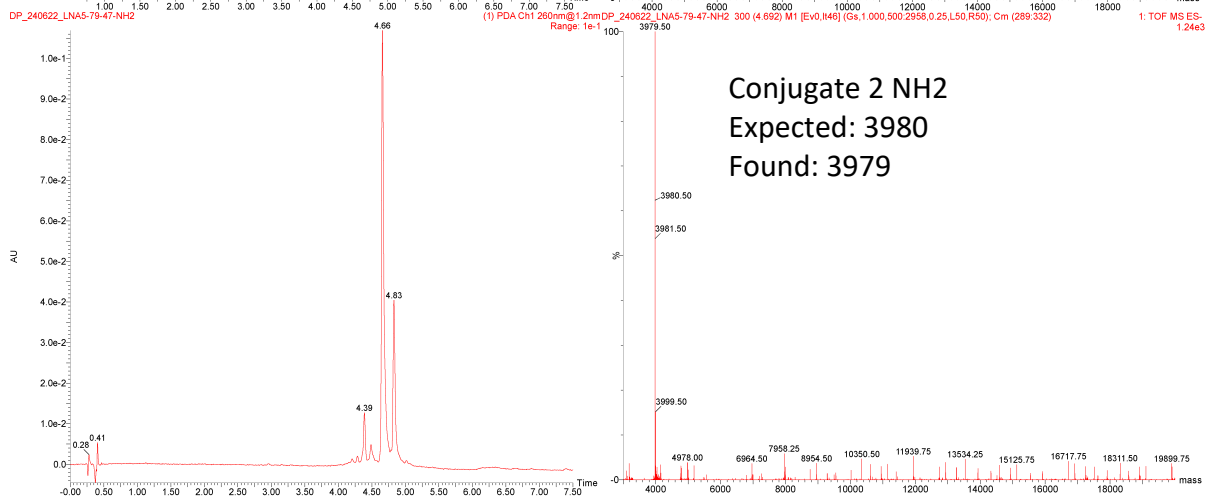

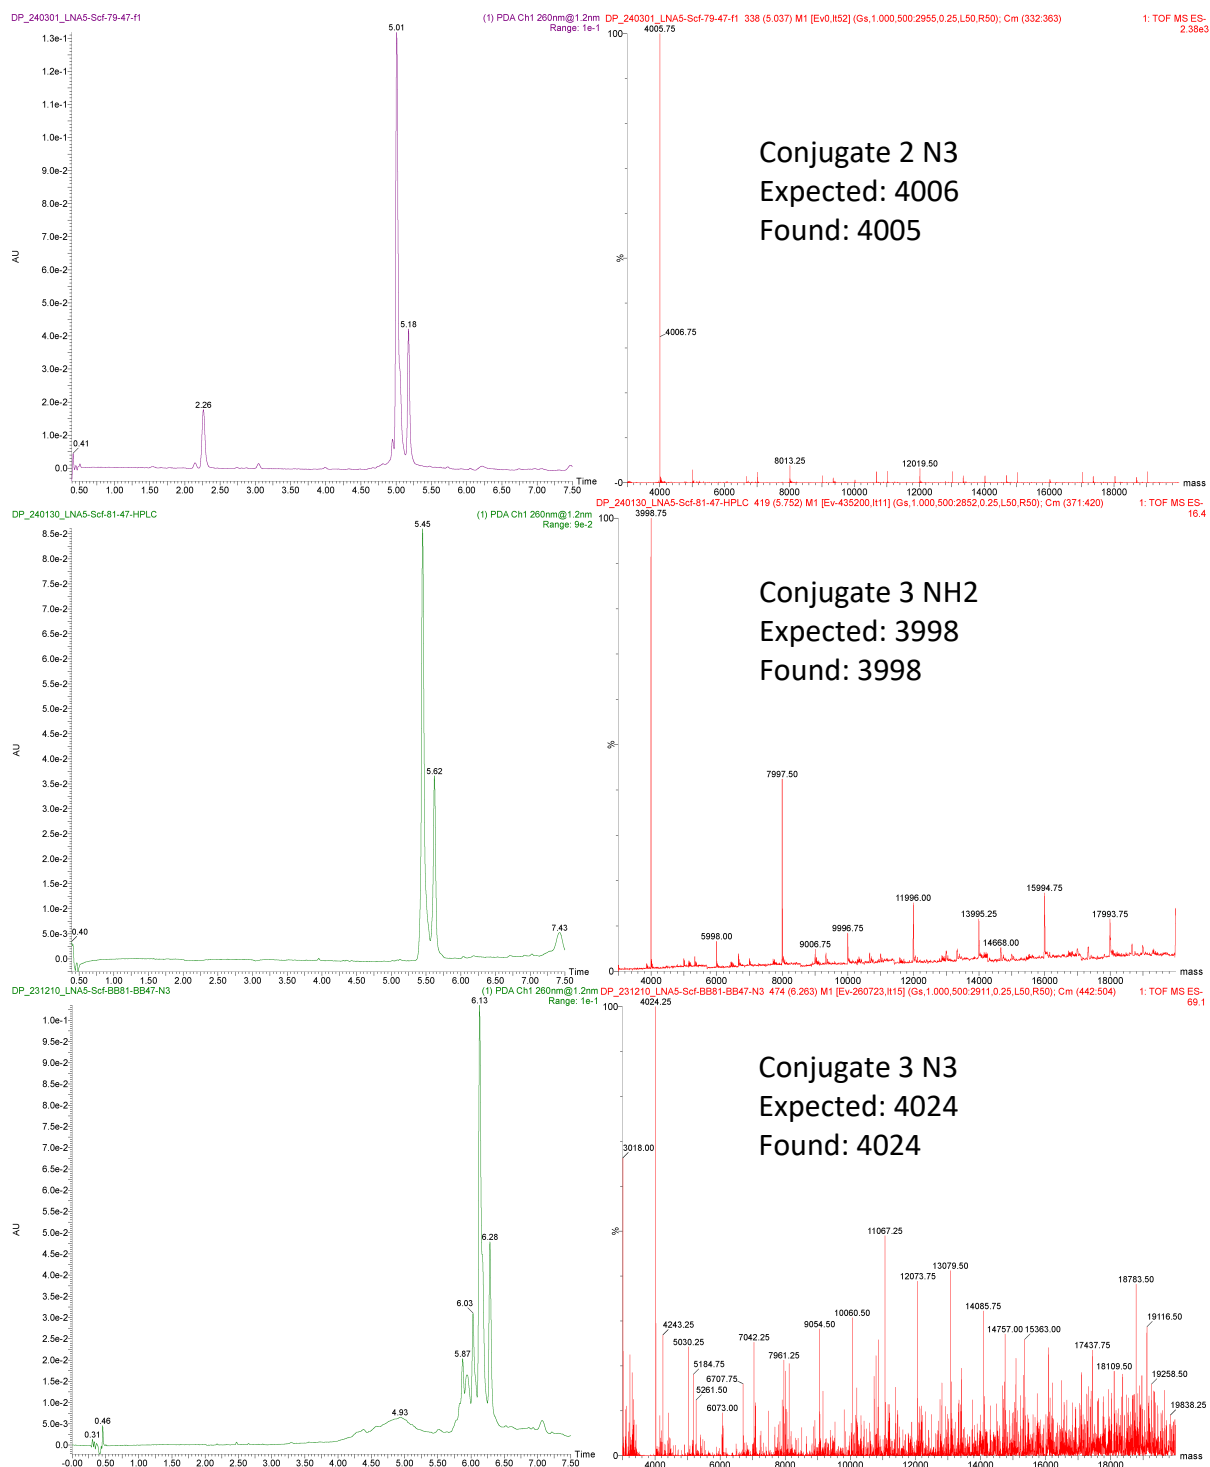

**Figure S39: LC-MS chromatogram (left) and the corresponding deconvoluted MS spectra (right) of synthesized PLAP Hit LNA5 conjugates**

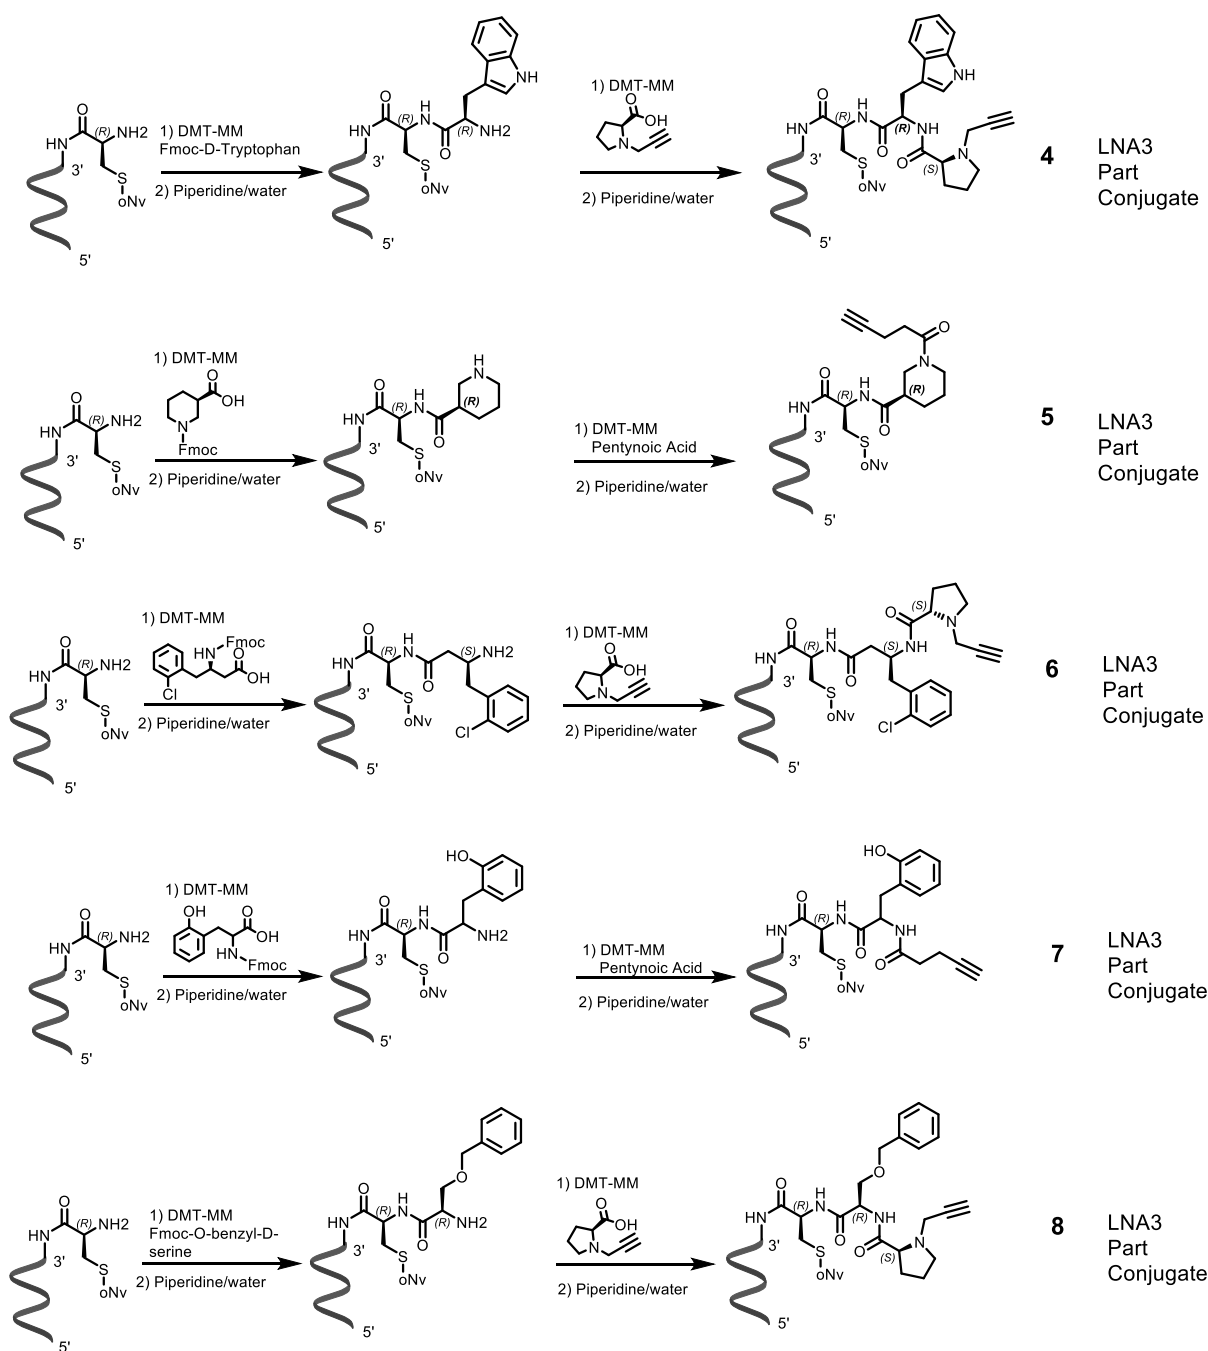

**Figure S40: Resynthesis scheme of identified PLAP hits 4-8 on LNA3 strand.**

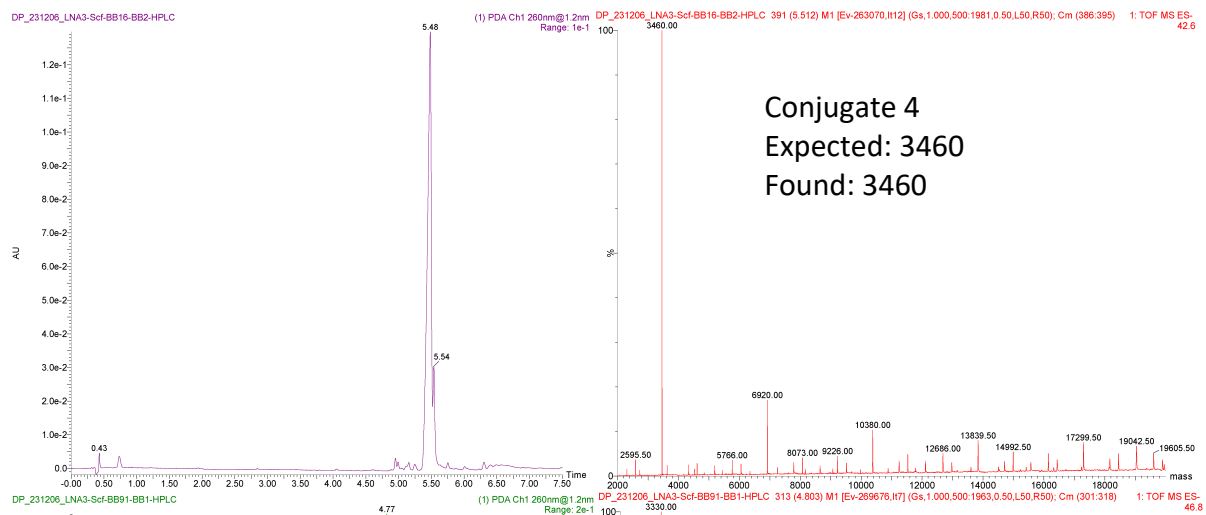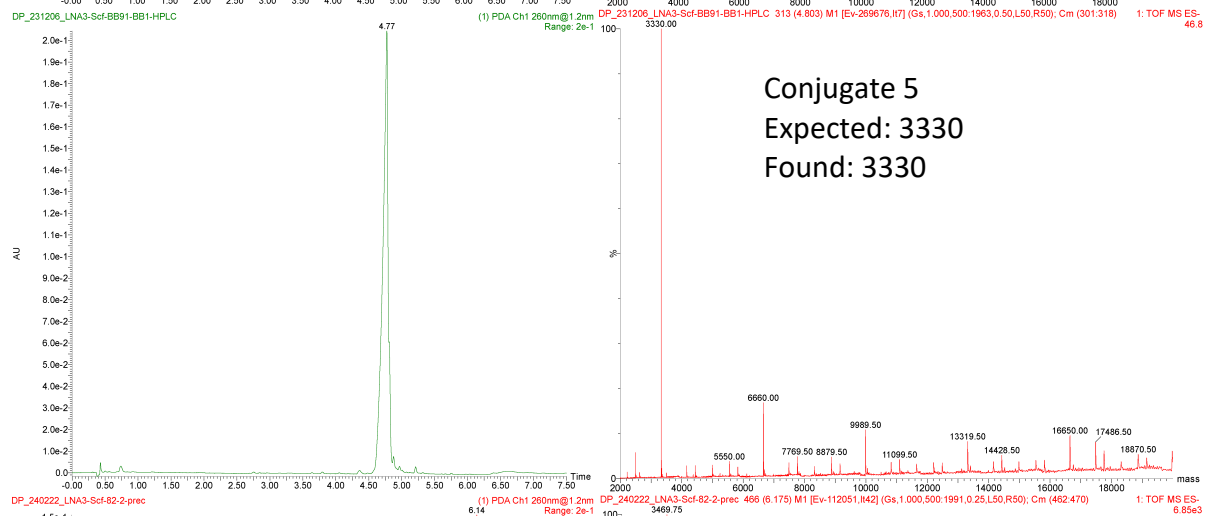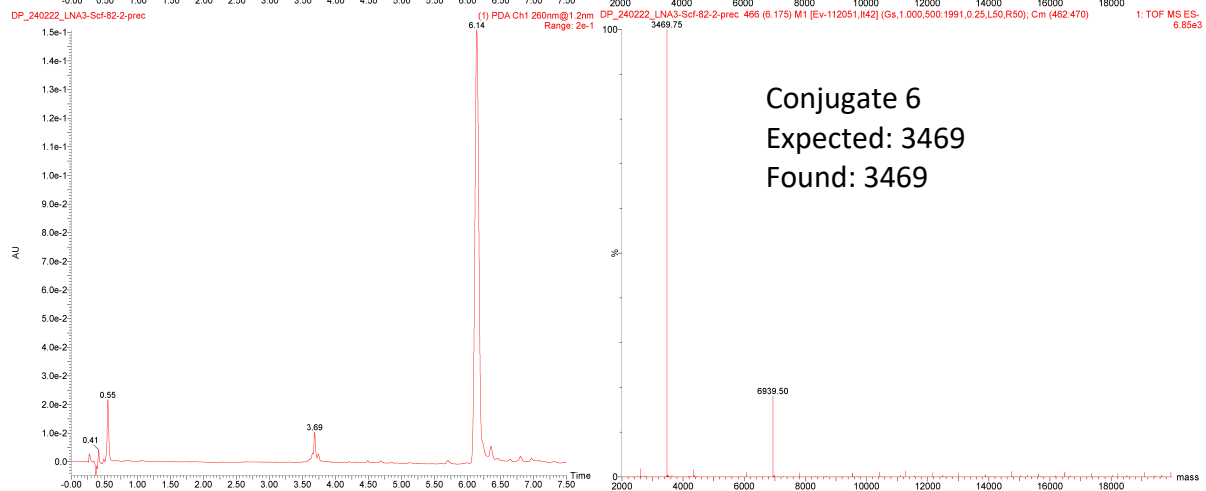

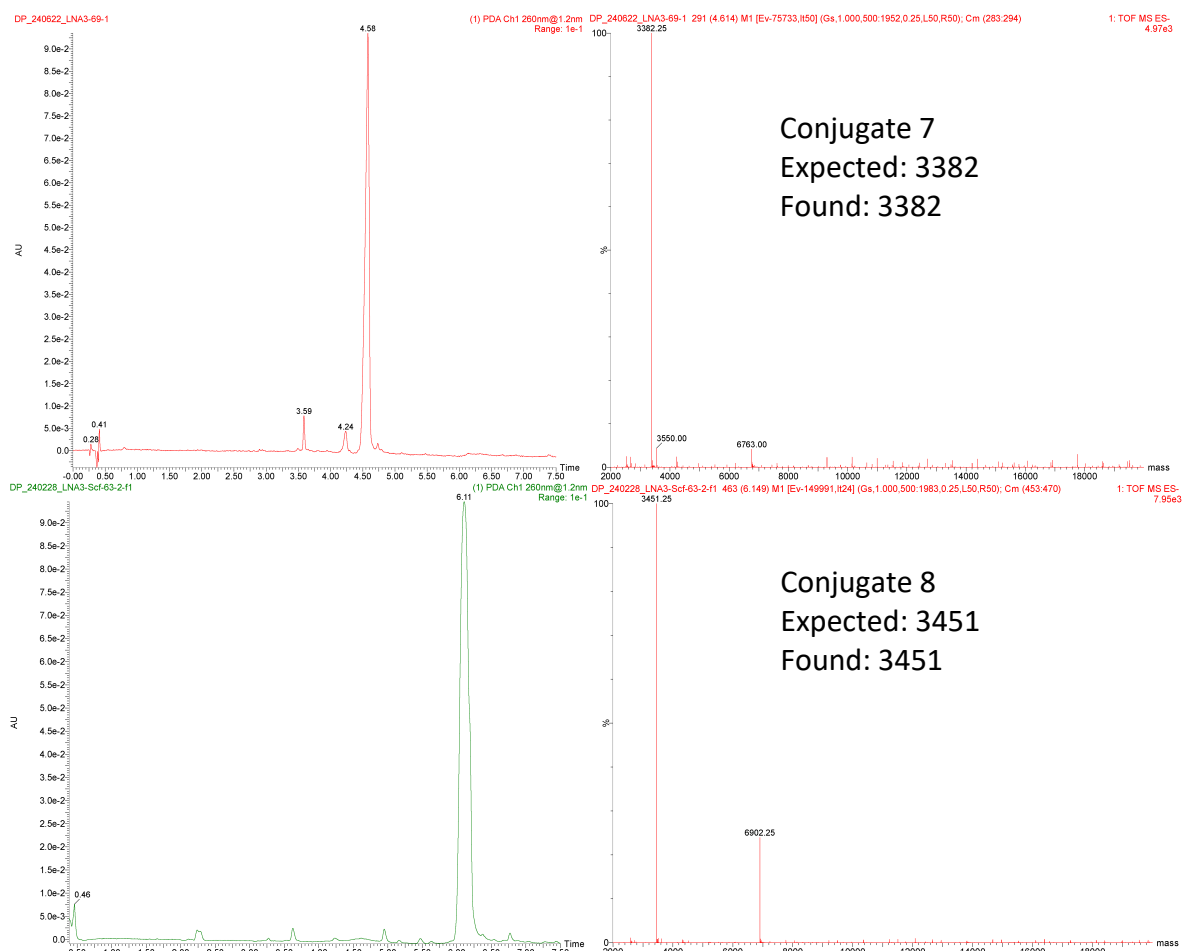

**Figure S41: LC-MS chromatogram (left) and the corresponding deconvoluted MS spectra (right) of synthesized PLAP Hit LNA3 conjugates**

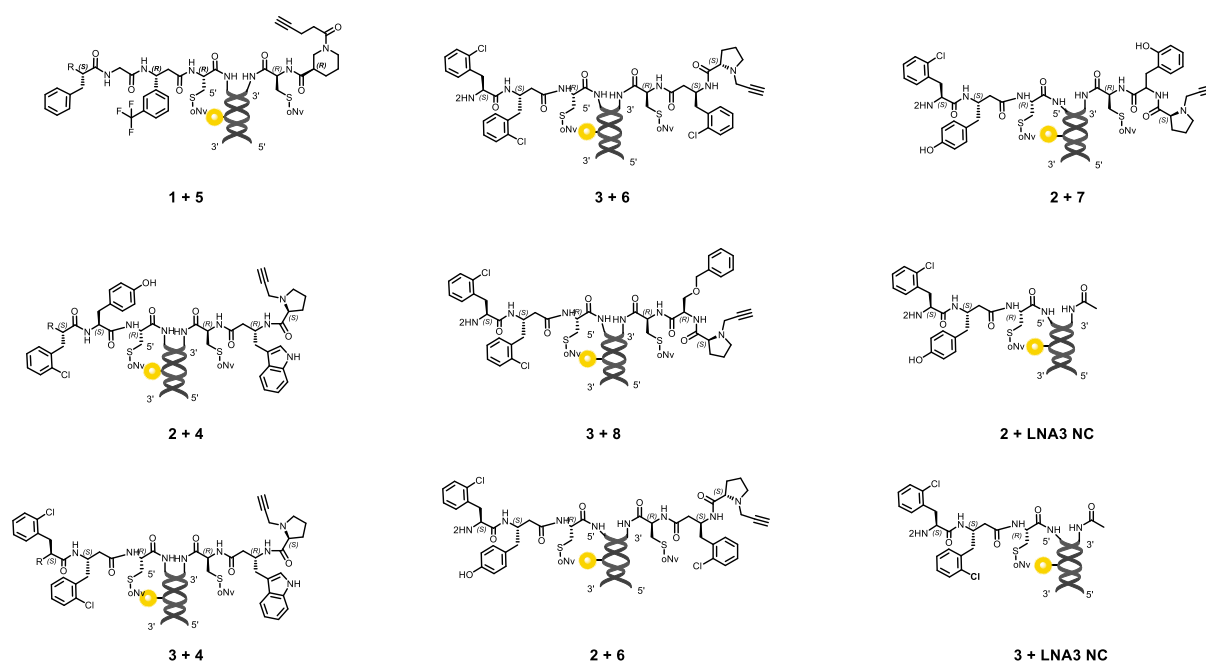

**Figure S42: Hybridization of PLAP conjugates 1-3 with conjugates 4-8 as well as negative controls as finally tested in fluorescence polarization experiments.**

To generate the maleimide linked hits in figure S43, 0.5 nmol of conjugate 3 and 6 respectively were mixed and reacted with 1,1'-(ethane-1,2-diyl)bis(1H-pyrrole-2,5-dione) (Maleimide 2), 1,1'-(pentane-1,5-diyl)bis(1H-pyrrole-2,5-dione) (Maleimide 6) or 1,1'-((ethane-1,2-diylbis(oxy))bis(ethane-2,1-diyl))bis(1H-pyrrole-2,5-dione) (Maleimide 8) according the thioether formation protocol in section 2.2. The conjugates were then precipitated, redissolved in mQ and concentrated & rediluted 3x with Amicon® Ultra Centrifugal Filter, 3 kDa.

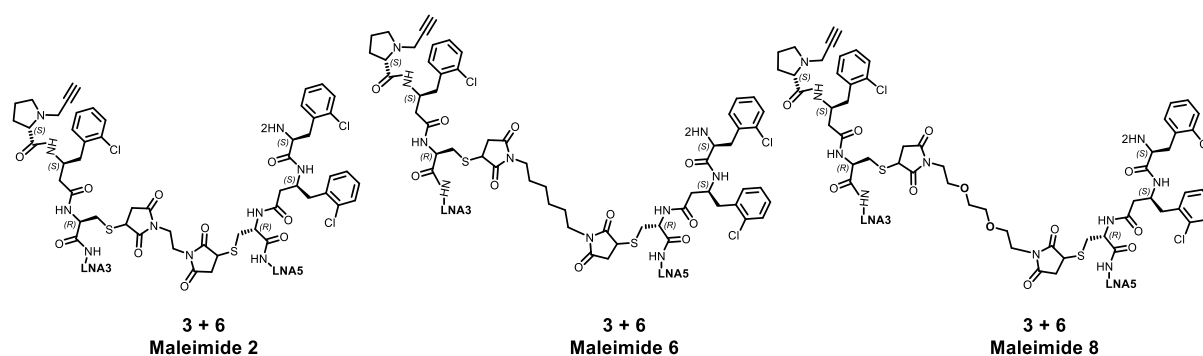

**Figure S43: Exploring variable length maleimide linkers for PLAP conjugates 3 and 6 for testing in fluorescence polarization experiments.**

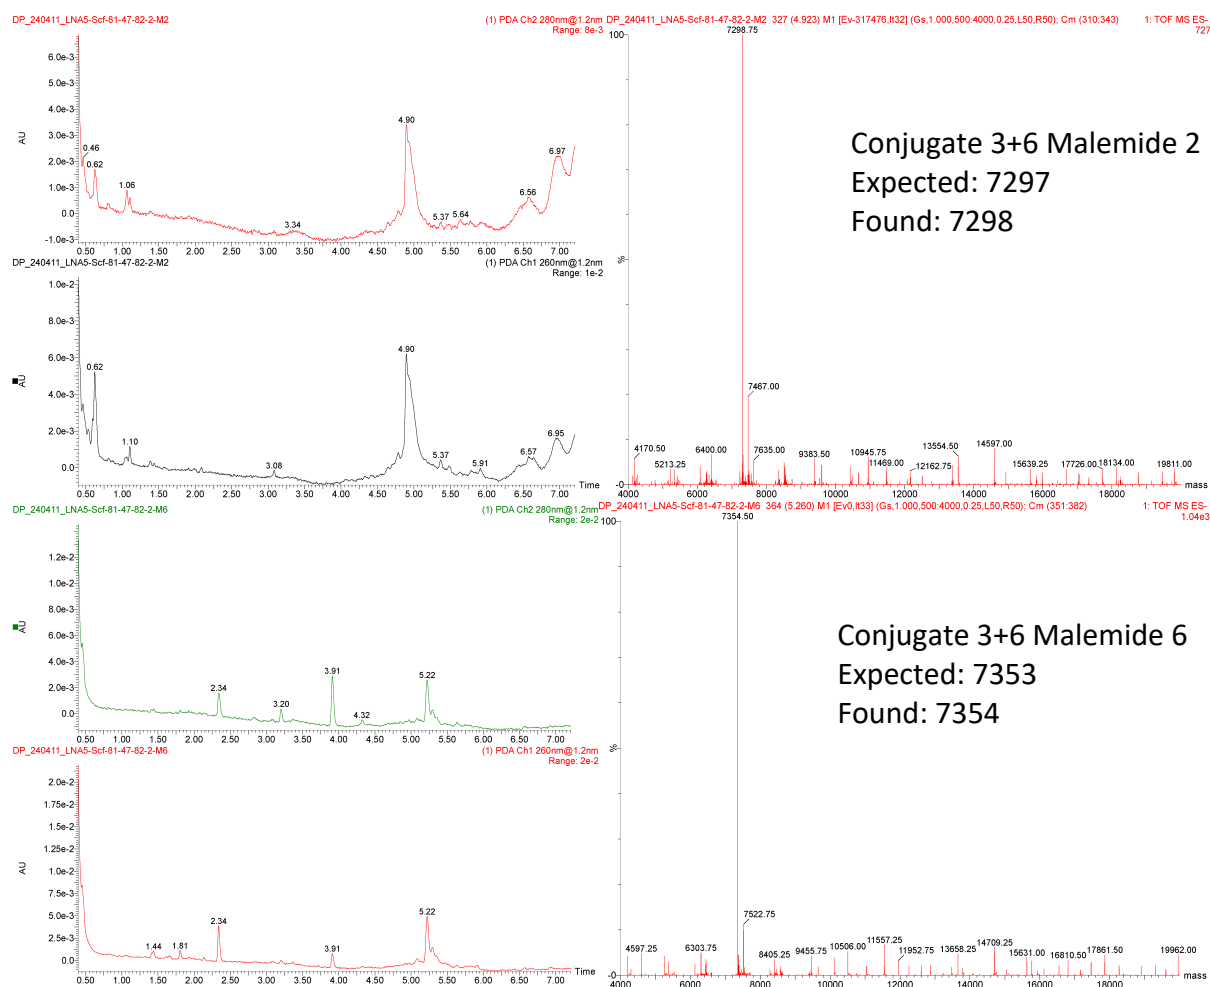

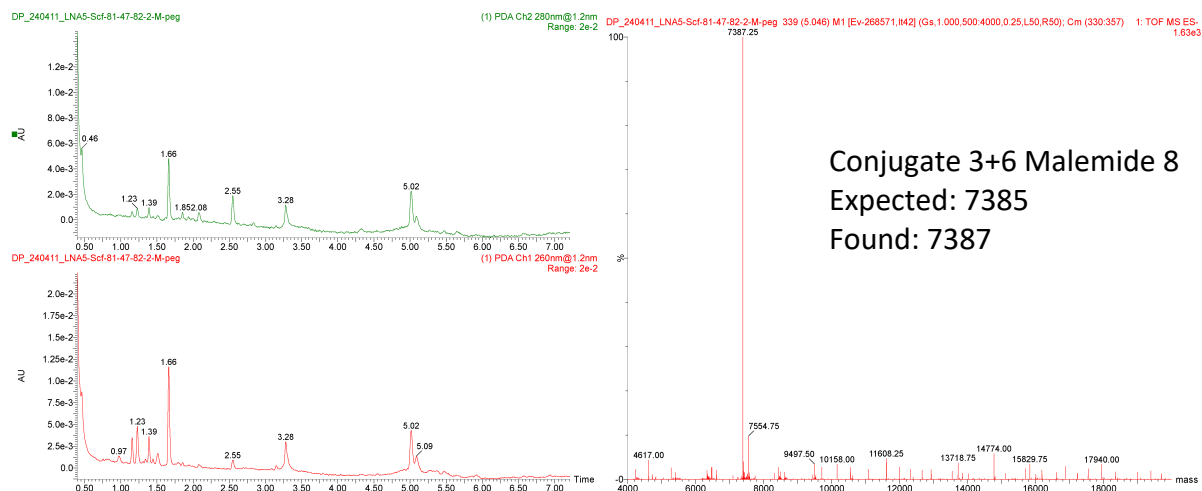

Conjugate 3+6 Maleimide 8  
Expected: 7385  
Found: 7387

**Figure S44:** LC-MS chromatogram (left) and the corresponding deconvoluted MS spectra (right) of linked PLAP hits 3 and 6. LC chromatogram provided as a 260/280 nm ratio due to low intensity of product peak, making it possible to distinguish it from non-LNA contaminants.

### 6.1.3. Thrombin

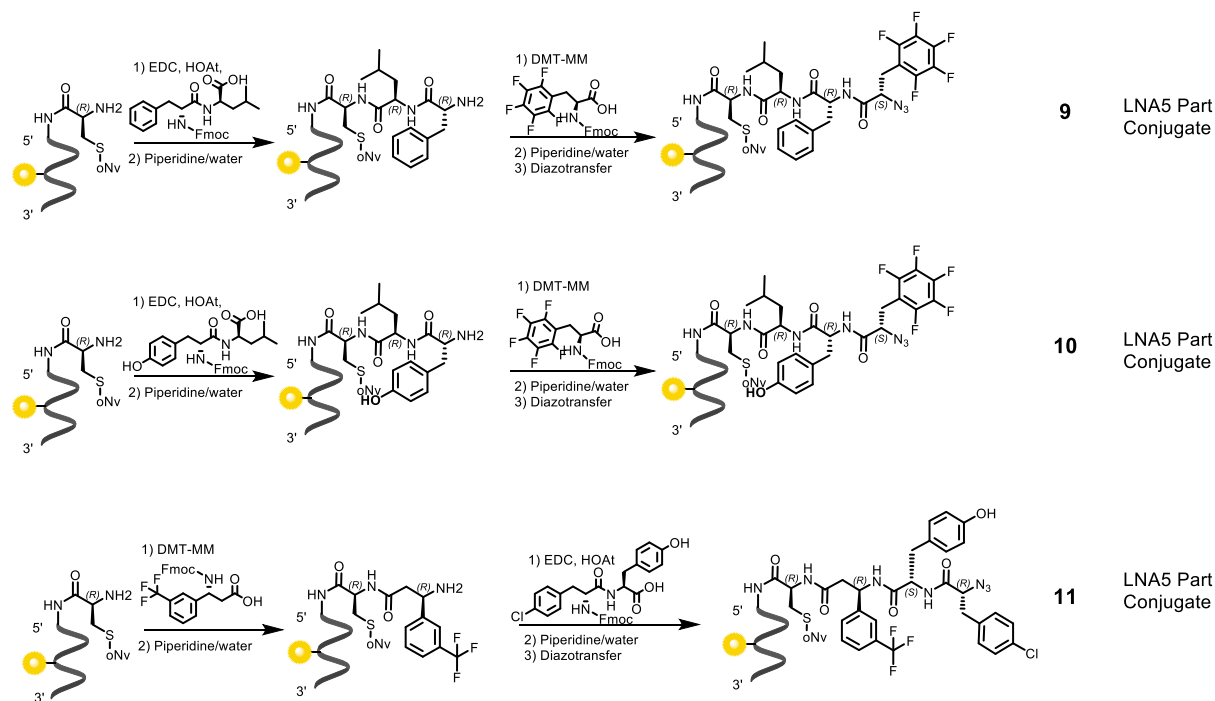

**Figure S45:** Resynthesis scheme of identified Thrombin hits 9-11 on LNA5 strand.

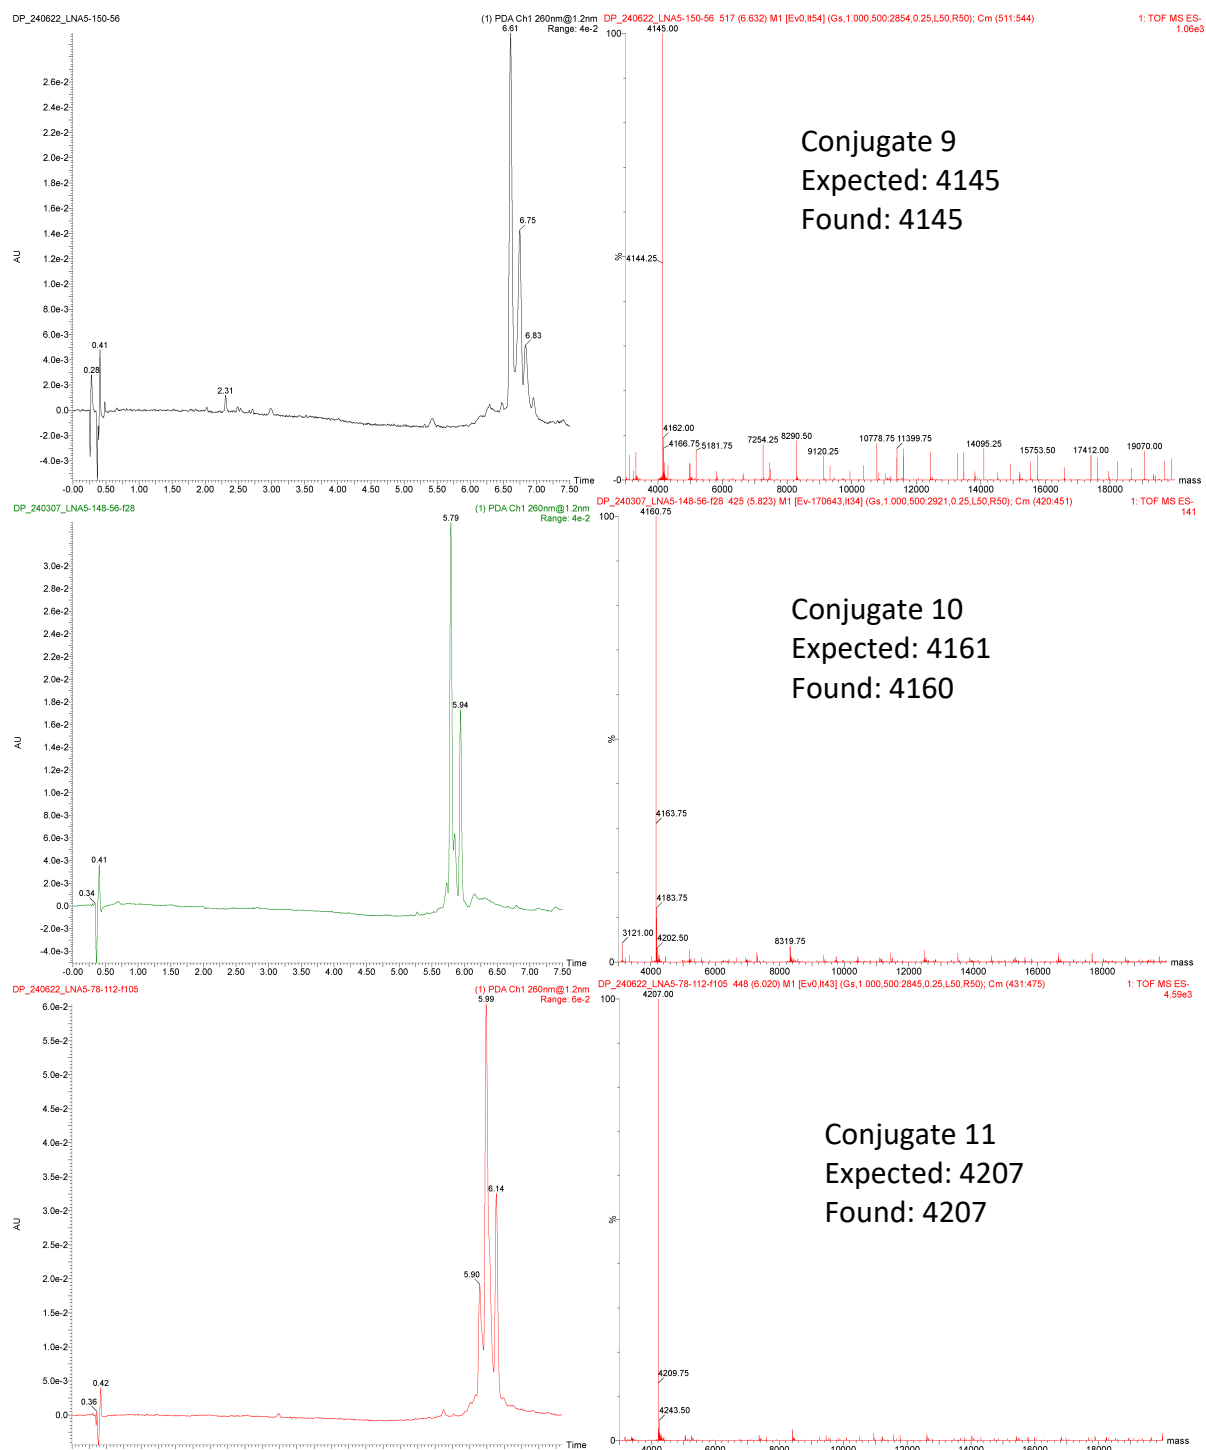

**Figure S46: LC-MS chromatogram (left) and the corresponding deconvoluted MS spectra (right) of synthesized Thrombin Hit LNA5 conjugates**

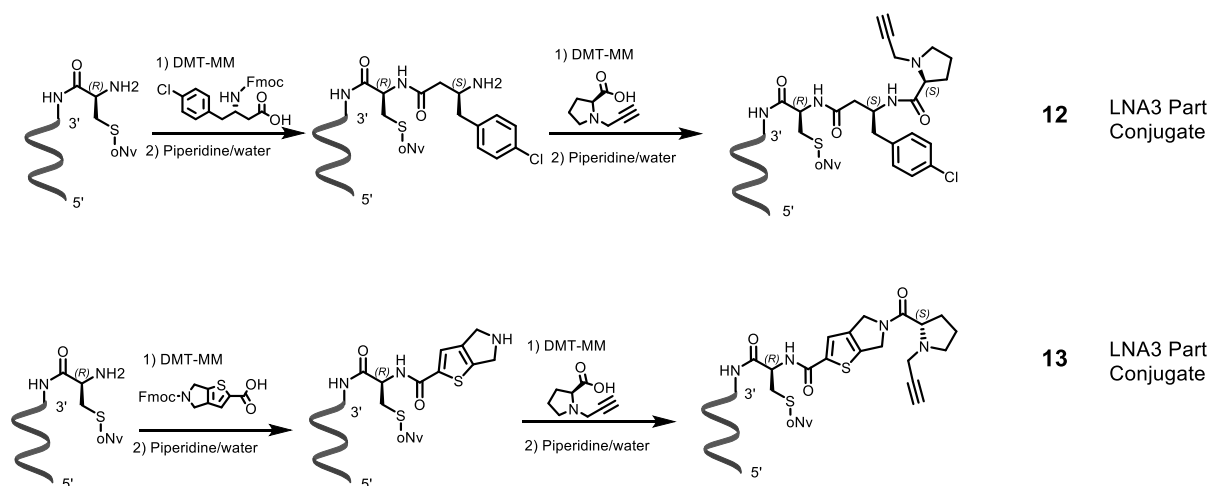

**Figure S47: Resynthesis scheme of identified Thrombin hits 12-13 on LNA3 strand.**

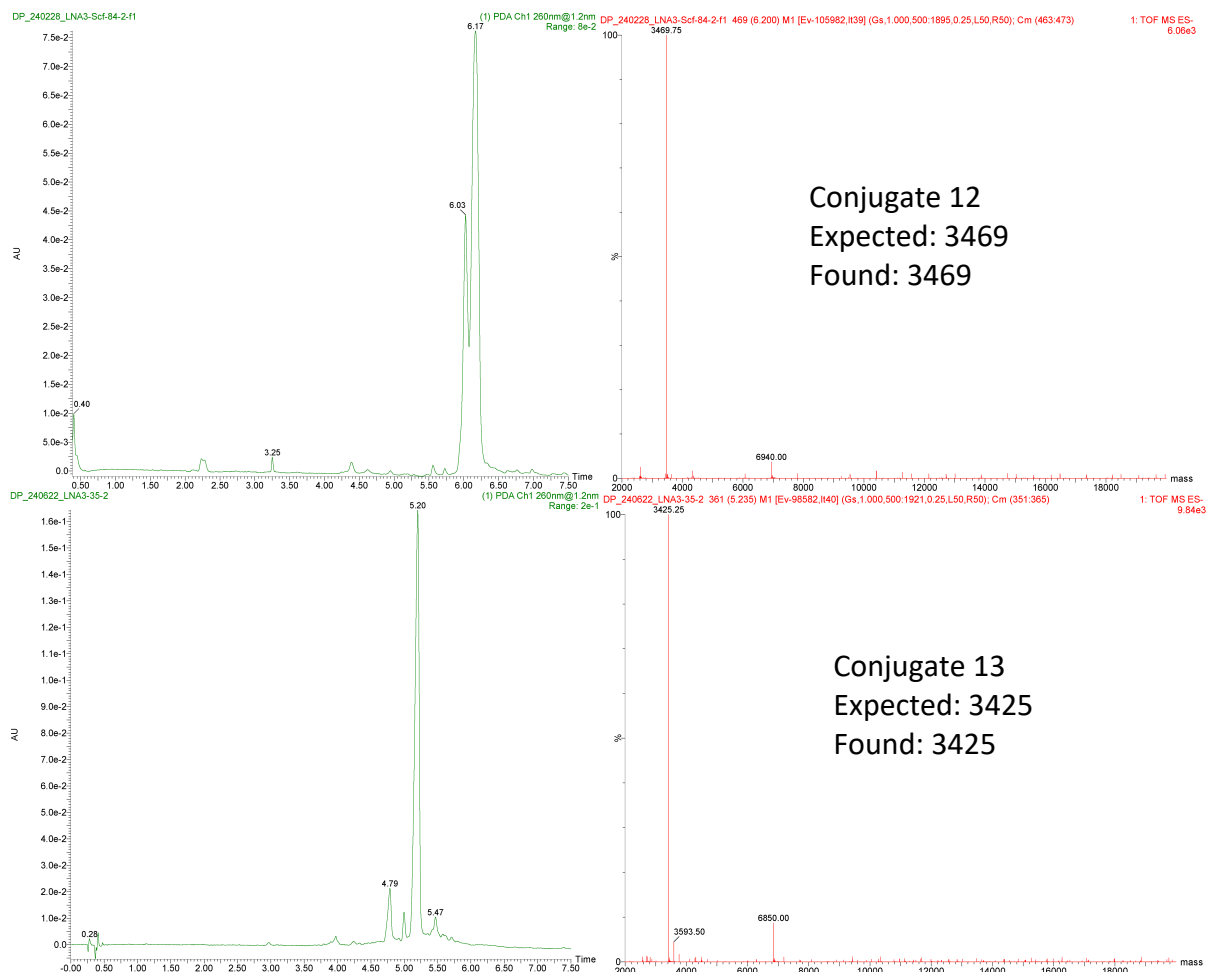

**Figure S48: LC-MS chromatogram (left) and the corresponding deconvoluted MS spectra (right) of synthesized Thrombin Hit LNA3 conjugates**

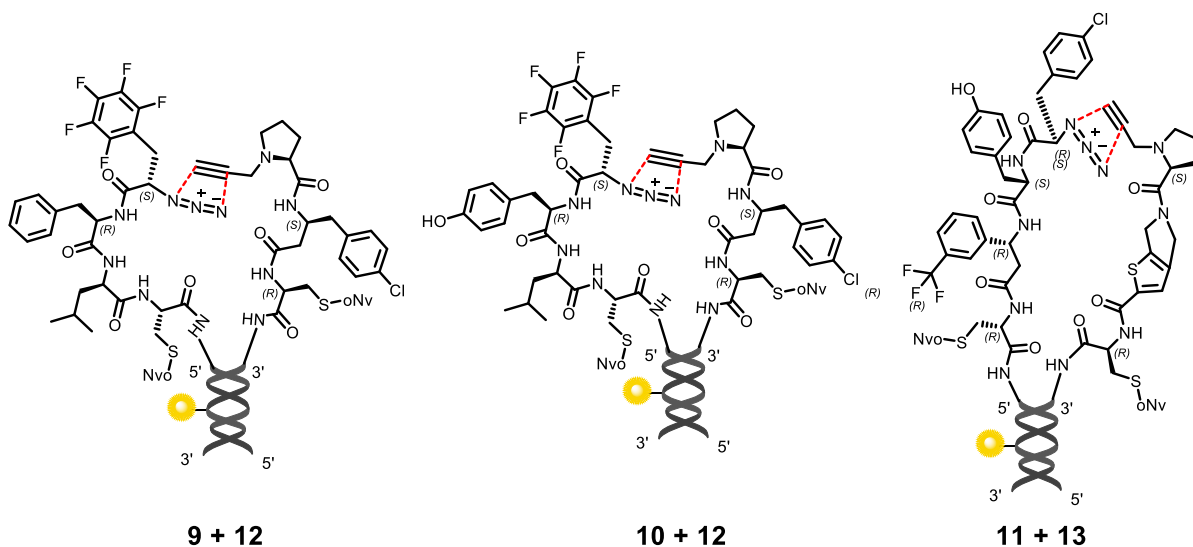

**Figure S49: Hybridization and click reaction of Thrombin conjugates 9-11 with conjugates 12-13 as finally tested in fluorescence polarization experiments.**

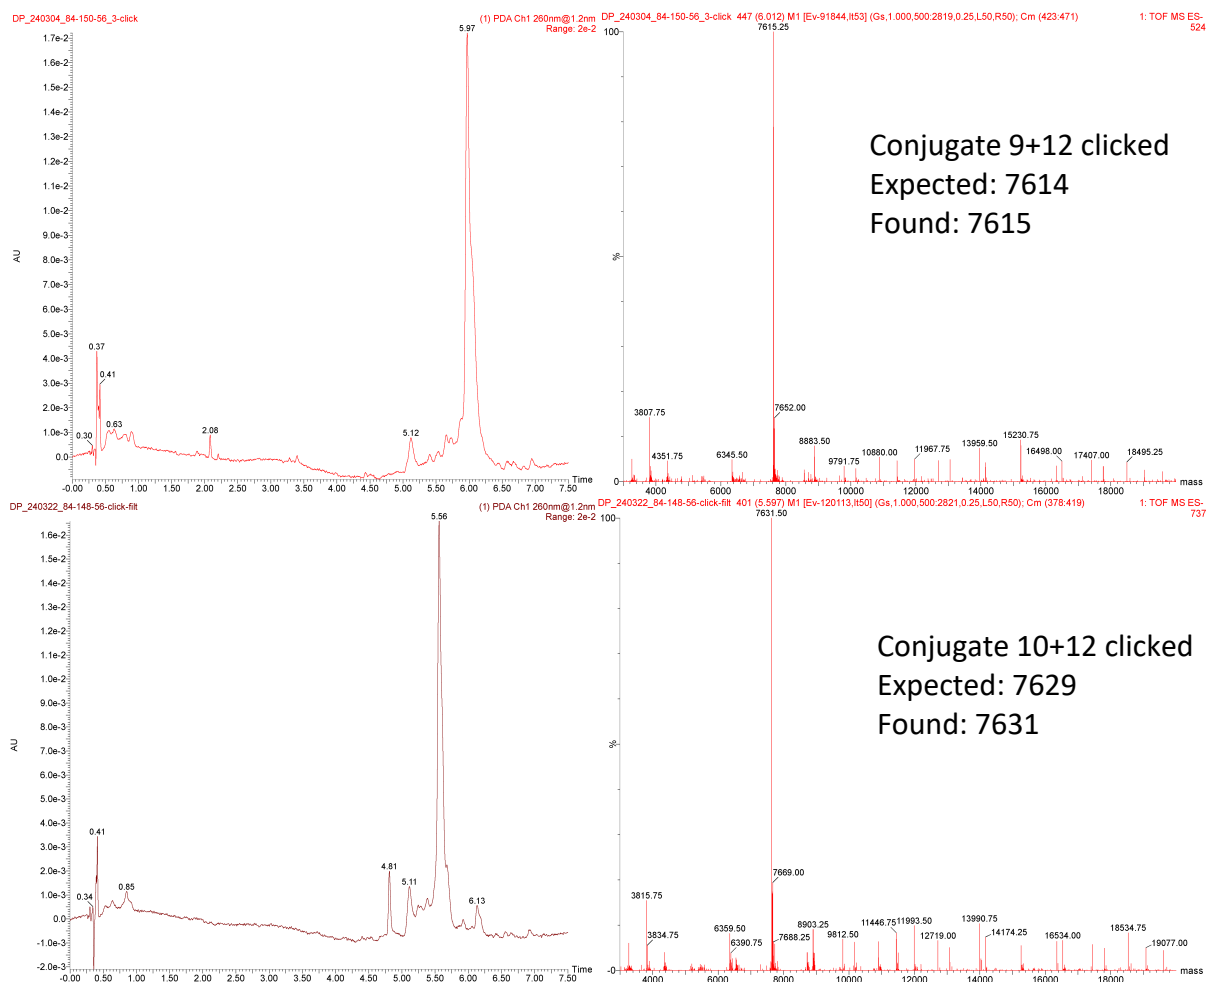

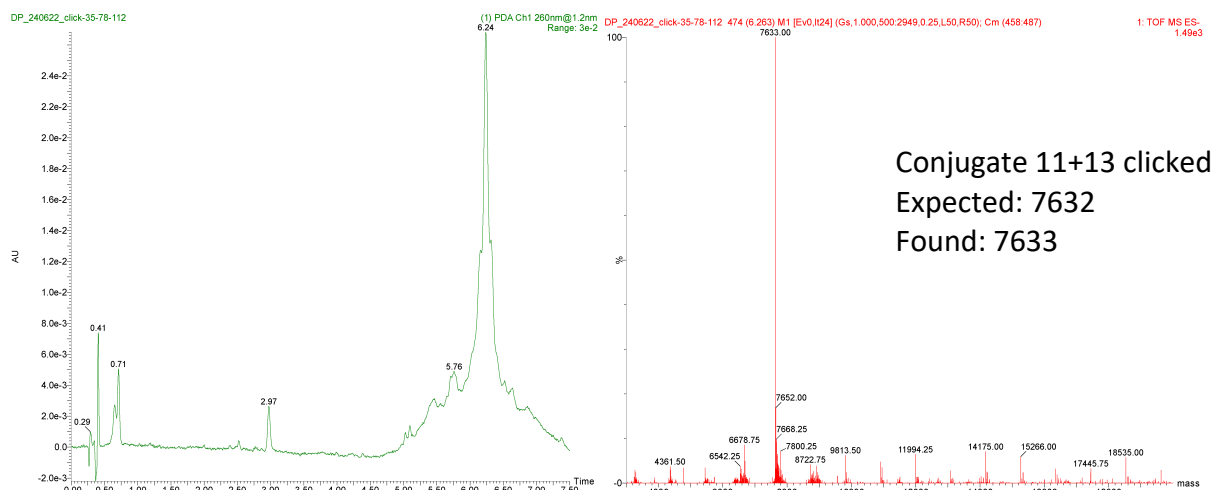

Figure S50: LC-MS chromatogram (left) and the corresponding deconvoluted MS spectra (right) of hybridized and clicked Thrombin LNA5 & LNA3 conjugates

#### 6.1.4. Streptavidin

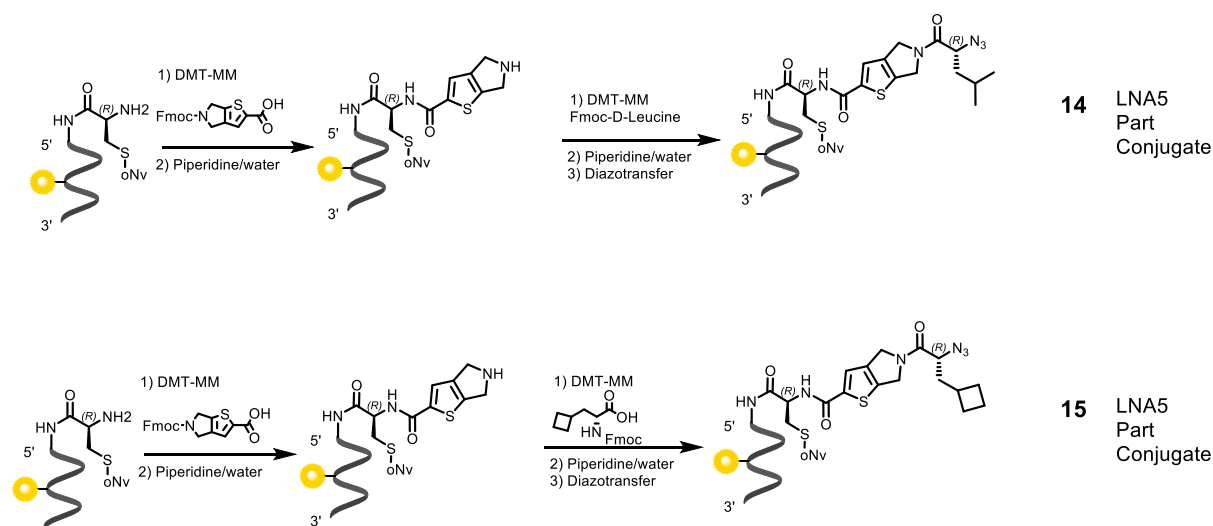

Figure S51: Resynthesis scheme of identified Streptavidin hits 14-15 on LNA5 strand.

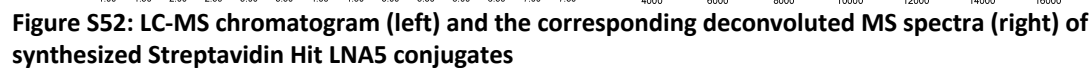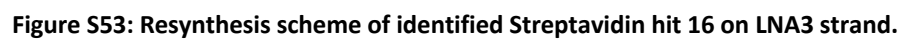

79

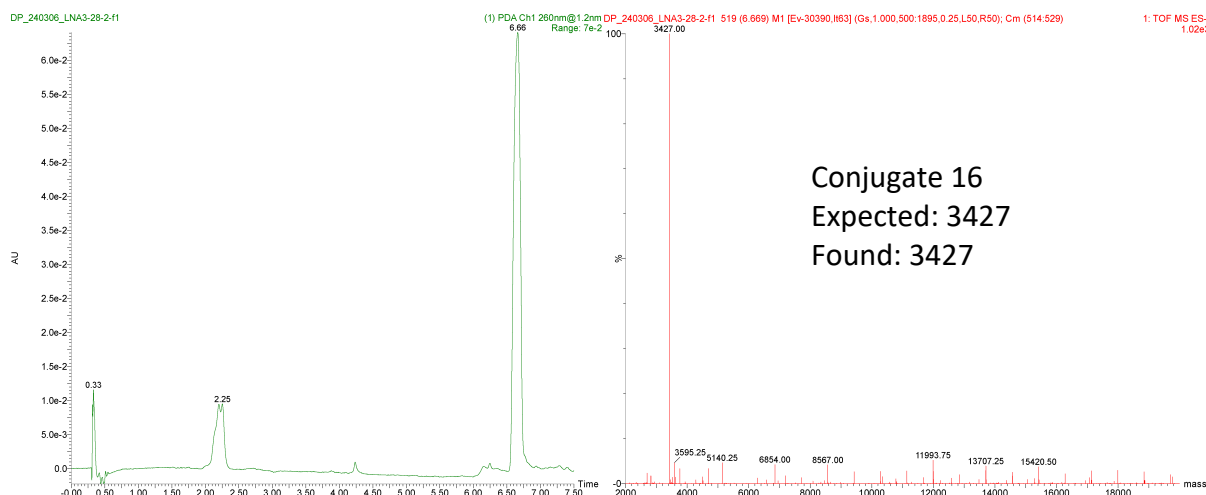

**Figure S54: LC-MS chromatogram (left) and the corresponding deconvoluted MS spectra (right) of synthesized Streptavidin Hit LNA3 conjugate**

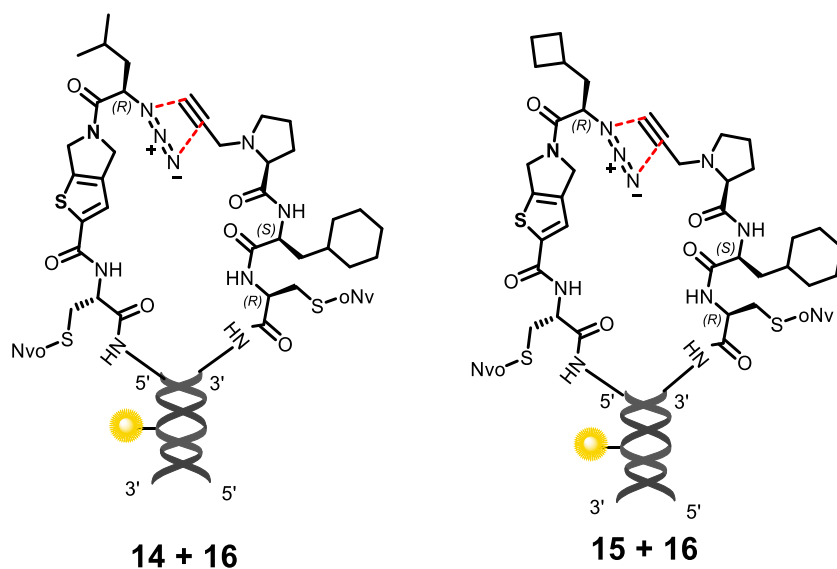

**Figure S55: Hybridization and click reaction of Streptavidin conjugates 14-15 with conjugate 16 as finally tested in fluorescence polarization experiments.**

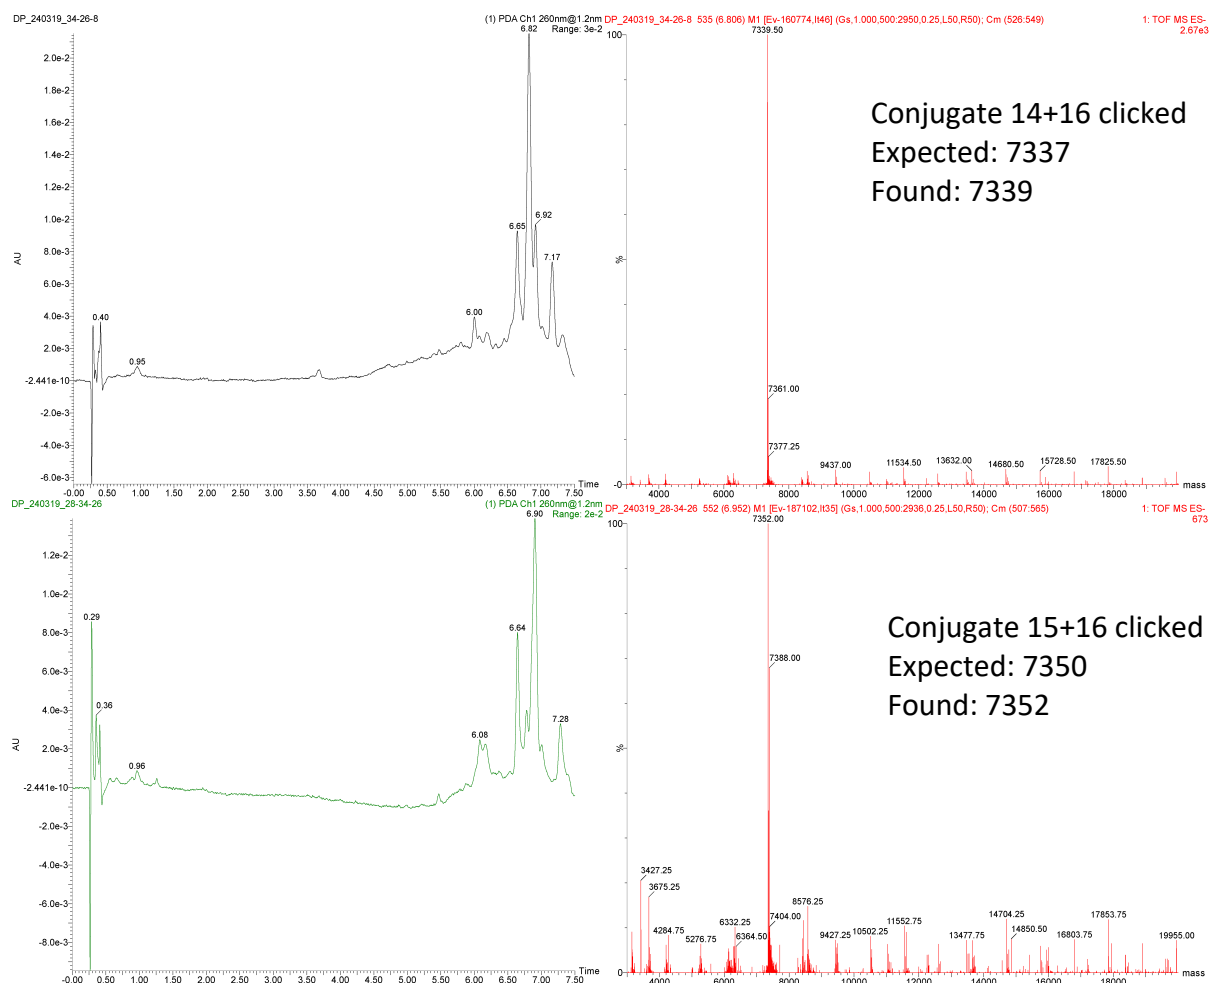

**Figure S56: LC-MS chromatogram (left) and the corresponding deconvoluted MS spectra (right) of hybridized and clicked Streptavidin LNA5 & LNA3 conjugates**

## 6.2. Off-DNA Hit Resynthesis

### 6.2.1. Absorbance-based Concentration Determination of Fluorescein Labeled Binders

Compound **41** was dissolved in a 1:1 DMSO: PBS solution and diluted to the concentrations given in table S16. Using the UV-Vis setting on a nanodrop spectrophotometer, absorbance at 507nm was recorded for the different dilutions. The linear correlation between absorbance & concentration was calculated and the slope equation was used to calculate concentration based on absorbance for all fluorescein labeled hits.

**Table S16: Concentration and corresponding absorbance of a DMSO/PBS solution of 41.**

| Concentration ( $\mu\text{M}$ ) | Absorbance (507nm) |
|---------------------------------|--------------------|
| 200                             | 1.34               |
| 120                             | 0.85               |
| 60                              | 0.43               |
| 30                              | 0.217              |
| 15                              | 0.114              |

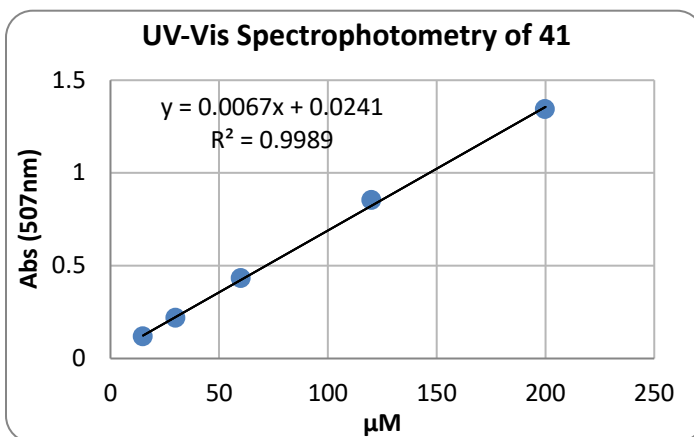

**Figure S57: Linear correlation between absorbance and concentration of 41**

### 6.2.2. General Synthesis Procedure

Tentagel® S NH<sub>2</sub> base resin in 1.5g batches was modified according to the scheme in figure S58. Consequently, Rink Amide modified resin was used for hit resynthesis. All hits were resynthesized using the products of two separate solid phase syntheses, where the products of both are covalently linked in one of the latter synthesis steps. Thus, some synthesis schemes are termed “resin 1” and “resin 2”, denoting the separate resins used for the convergent synthesis of a single final product. Protocols used for resynthesis of hits are given in section 2.3.

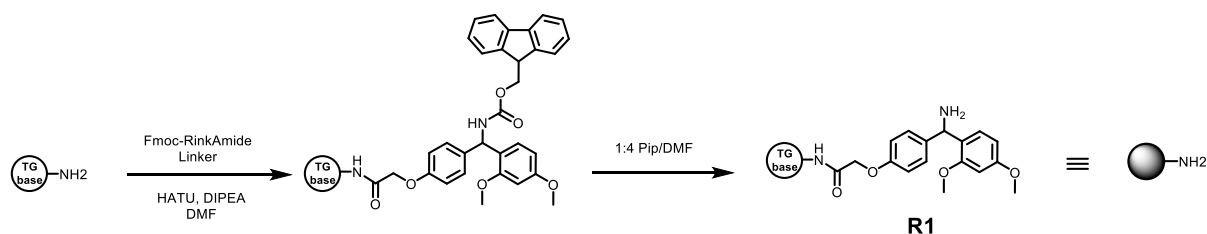

**Figure S58: Tentagel® base resin preparation for resynthesis of hit. Fmoc-Rink Amide linker was installed on base resin prior to starting synthesis of conjugates**

### 6.2.3. Thrombin (Compounds 19-24)

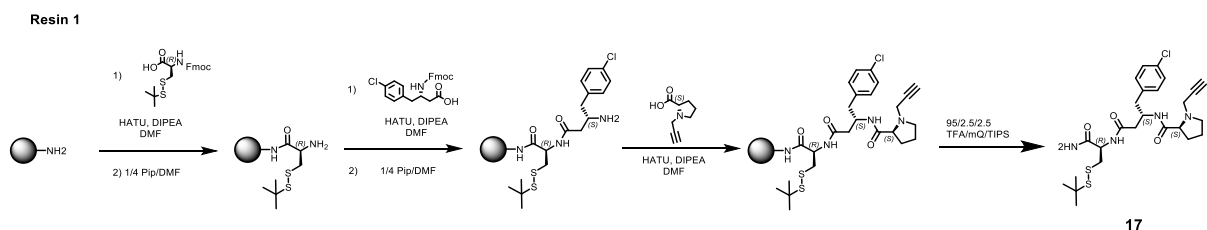

**Synthesis of 17:** 500 mg of resin **R1** was reacted in repeating amidation and Fmoc deprotection cycles with Fmoc-Cys(StBu)-OH, (S)-3-((((9H-fluoren-9-yl)methoxy)carbonyl)amino)-4-(4-chlorophenyl)butanoic acid and prop-2-yn-1-yl-L-proline

to generate intermediate **17**. The intermediate was cleaved off the resin, precipitated and used as is for resin 2 synthesis of **18**.

Compound **17** ESI-MS:  $[M+H]^+$  539.15 g/mol, found 539.12

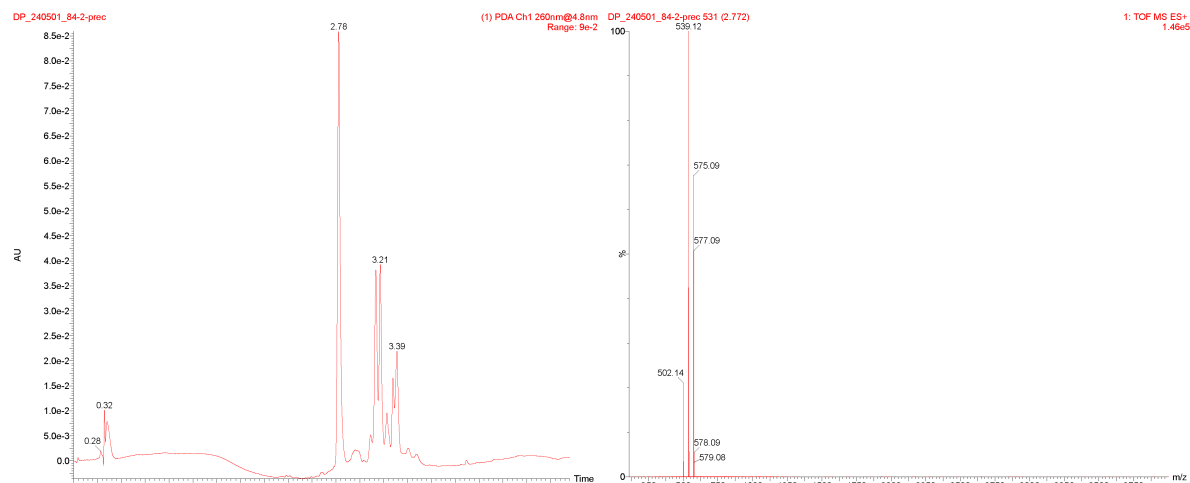

Figure S59: LC-MS chromatogram (left) and the corresponding deconvoluted MS spectra (right) of compound **17**

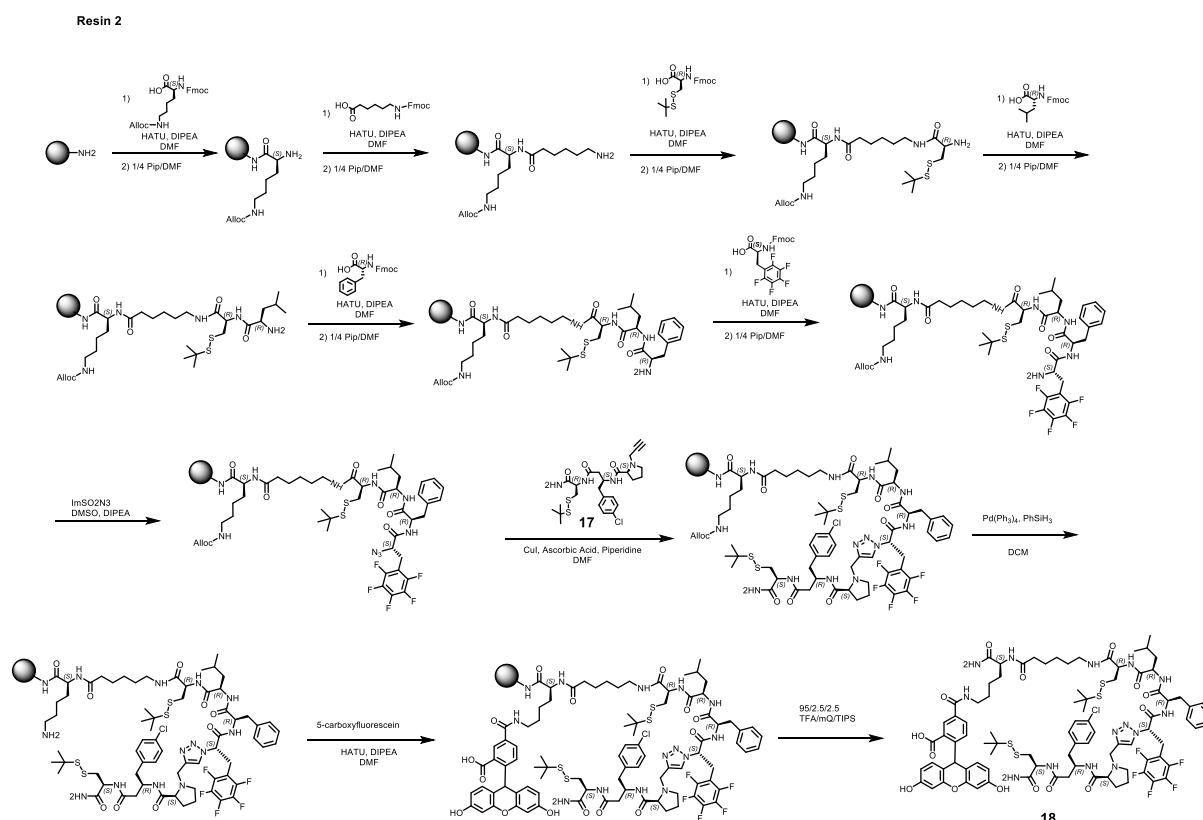

**Synthesis of 18:** 500 mg of resin **R1** was reacted in repeating amidation and Fmoc deprotection cycles with Fmoc-Lys(Alloc)-OH, Fmoc-6-Ahx-OH, Fmoc-Cys(StBu)-OH, Fmoc-D-Leucine, Fmoc-D-Phenylalanine and Fmoc-Phe(F5)-OH. The terminal amino group was then subjected to a diazotransfer reaction and reacted via CuAAC with intermediate **17**. The

lysine Alloc group was then deprotected and 5-carboxyfluorescein was attached to afford compound **18**, which was cleaved off the resin and HPLC purified.

Compound **18** (5mg, 2% yield) ESI-MS:  $[M+H]^+$  1870.66 g/mol, found 1871.66

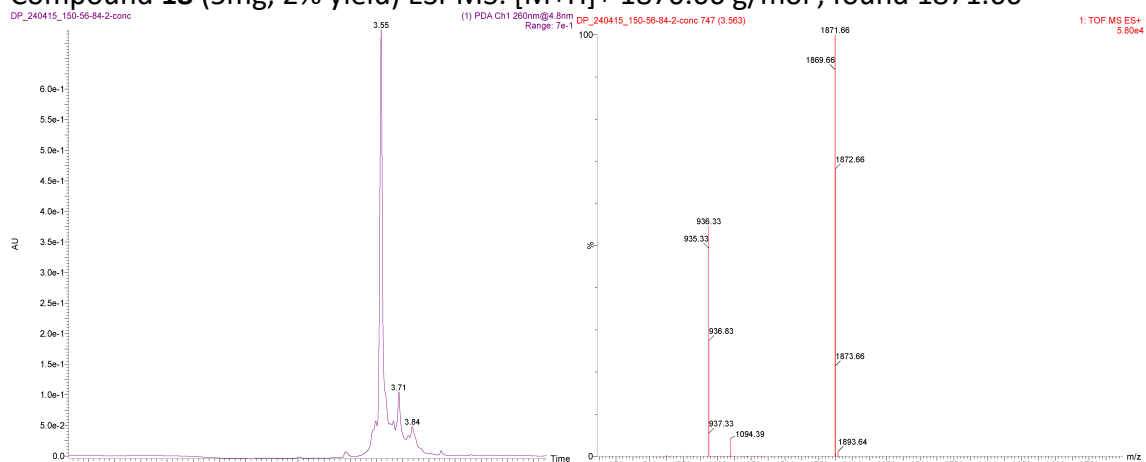

Figure S60: LC-MS chromatogram (left) and the corresponding deconvoluted MS spectra (right) of compound **18**

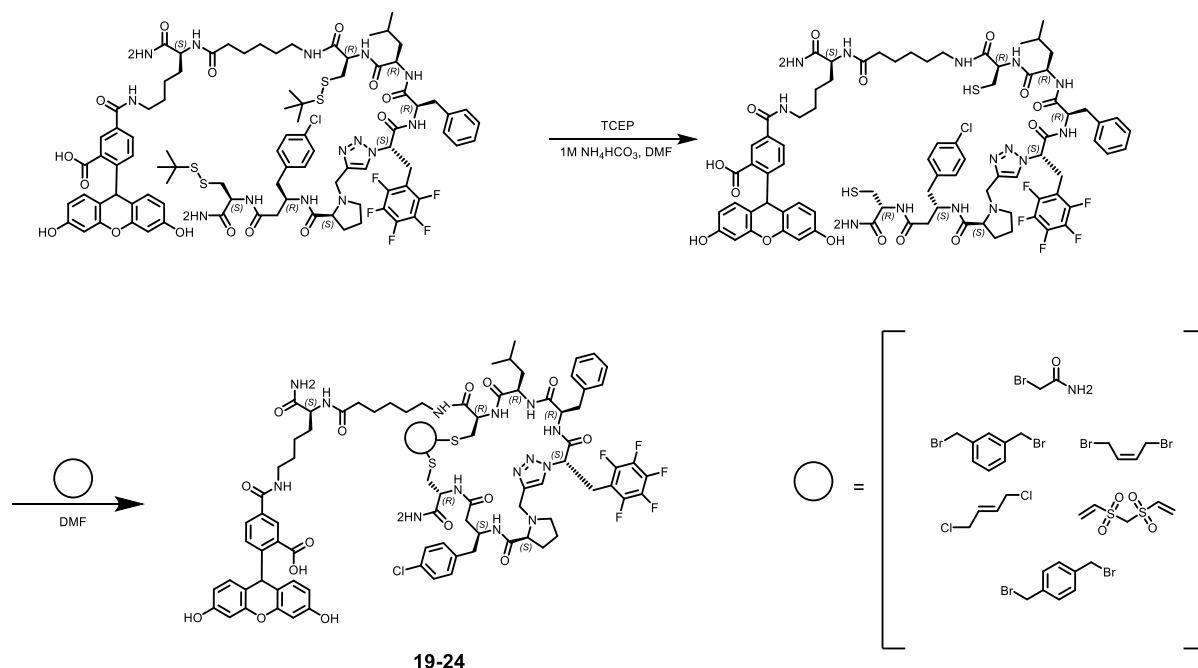

**Synthesis of 19-24:** Compound **18** (50  $\mu$ L, 6.7 mM in DMSO) was treated with TCEP so that the two cysteine Stbu groups were deprotected and the cysteines were reacted with 1 of 6 different electrophiles according to general procedure, to generate 5 different macrocycles **19-23** and one open peptide **24**, which were all HPLC purified.

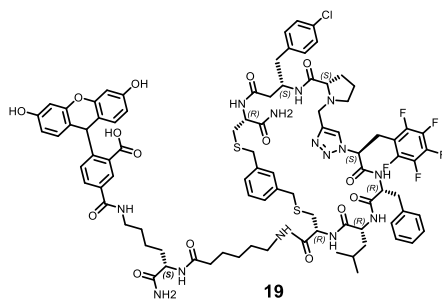

**19**

Compound **19** (0.0317 mg, 5% yield) ESI-MS:  $[M+H]^+$  1796.64 g/mol, found 1796.64

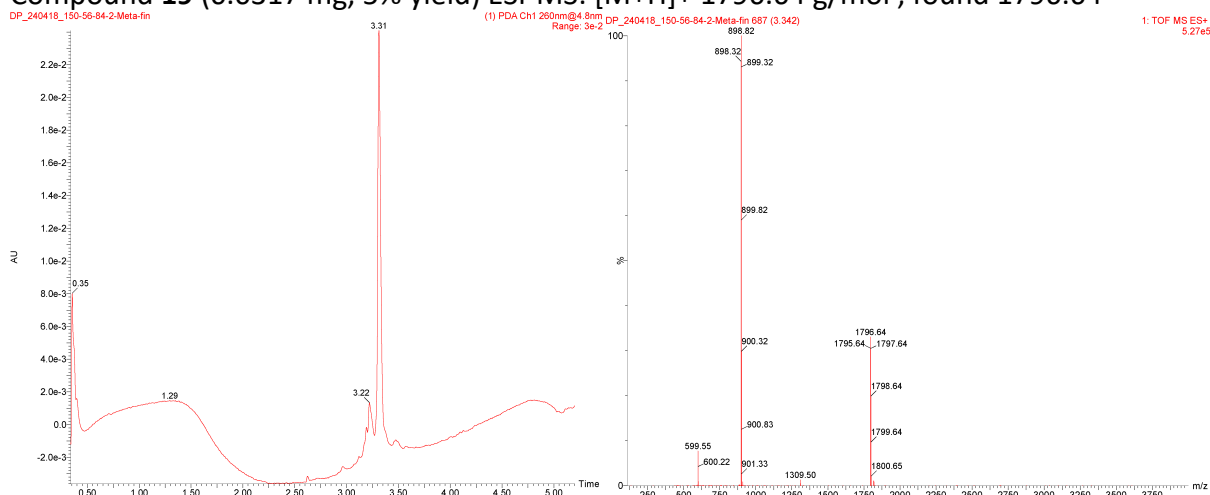

**Figure S61: LC-MS chromatogram (left) and the corresponding deconvoluted MS spectra (right) of compound 19**

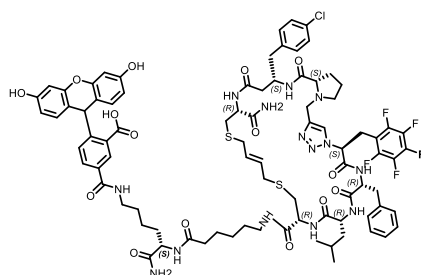

**20**

Compound **20** (0.0515 mg, 8% yield) ESI-MS:  $[M+H]^+$  1746.62 g/mol, found 1746.63

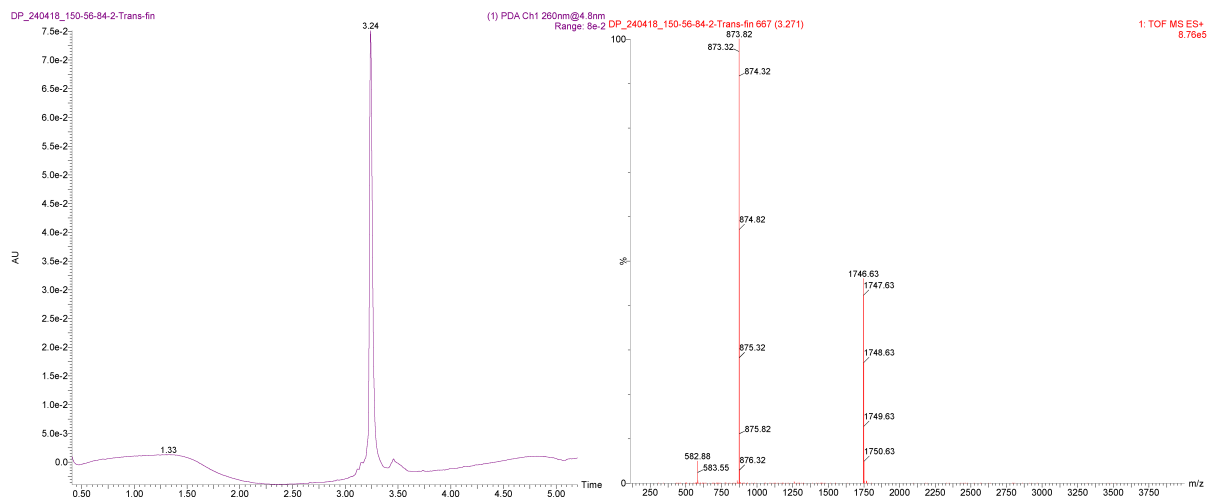

**Figure S62: LC-MS chromatogram (left) and the corresponding deconvoluted MS spectra (right) of compound 20**

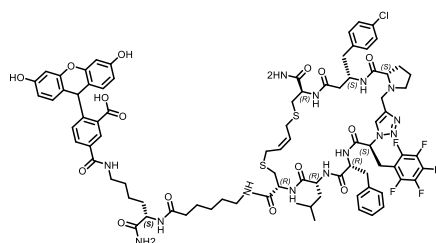

**21**

Compound **21** (0.0515 mg, 8% yield) ESI-MS:  $[M+H]^+$  1746.62 g/mol , found 1746.63

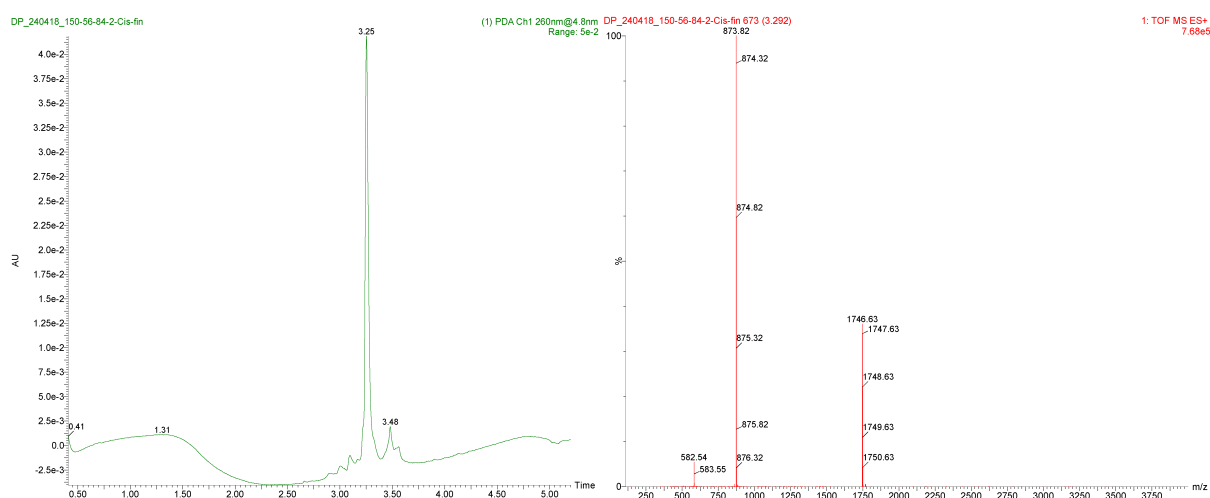

**Figure S63: LC-MS chromatogram (left) and the corresponding deconvoluted MS spectra (right) of compound 21**

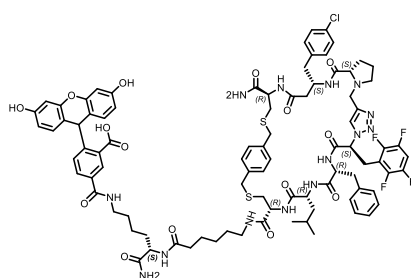

**22**

Compound **22** (0.0515 mg, 8% yield) ESI-MS:  $[M+H]^+$  1796.64 g/mol , found 1796.64

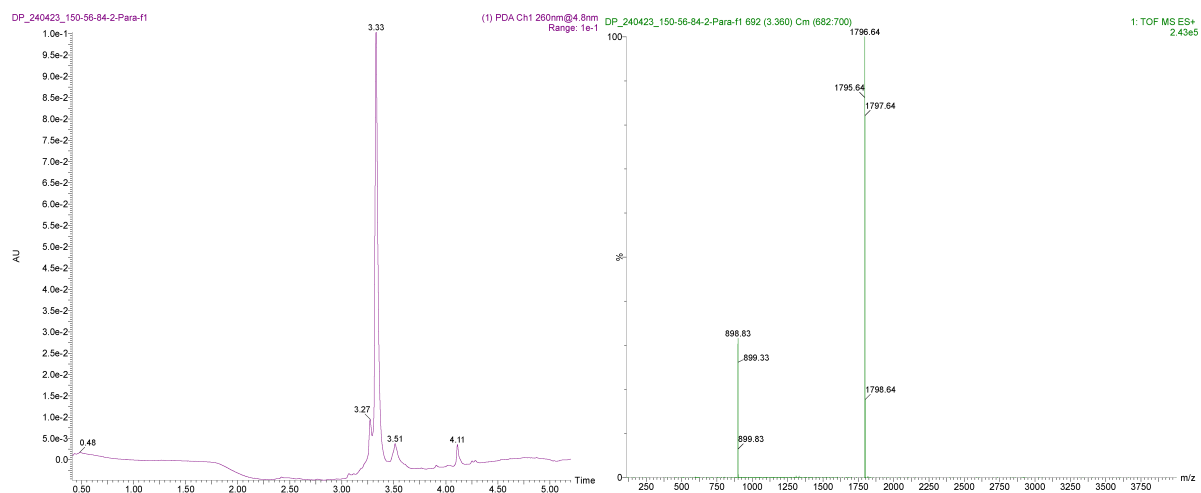

Figure S64: LC-MS chromatogram (left) and the corresponding deconvoluted MS spectra (right) of compound 22

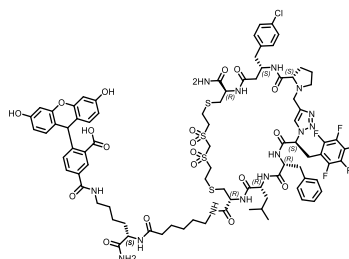

23

Compound **23** (0.0515 mg, 8% yield) ESI-MS:  $[M+H]^+$  1890.58 g/mol, found 1891.59

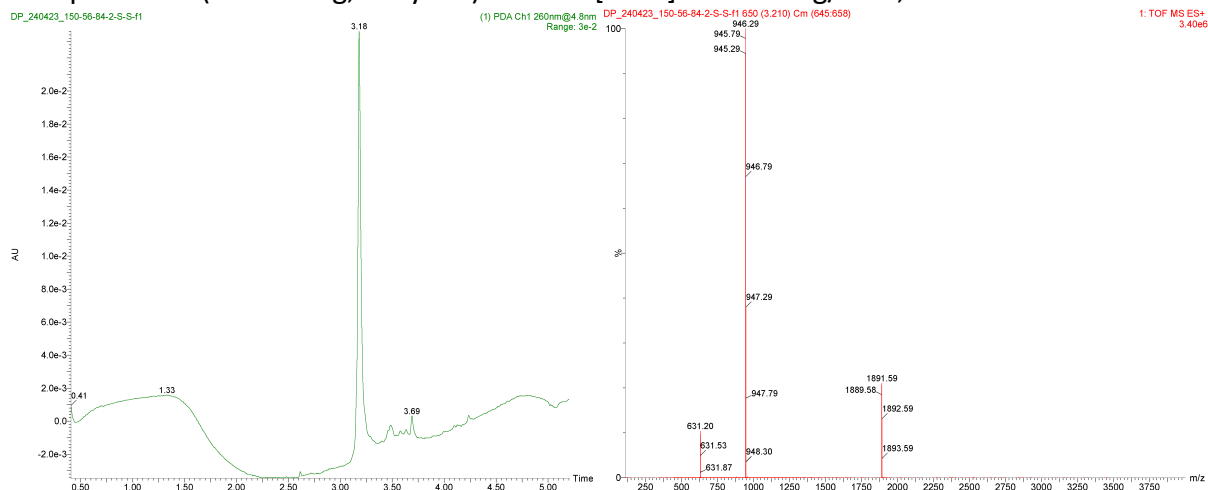

Figure S65: LC-MS chromatogram (left) and the corresponding deconvoluted MS spectra (right) of compound 23

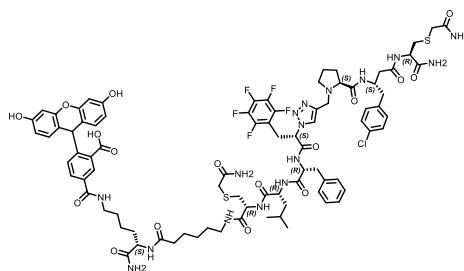

24

Compound **24** (0.0515 mg, 8% yield) ESI-MS:  $[M+H]^+$  1808.63 g/mol, found 1808.47

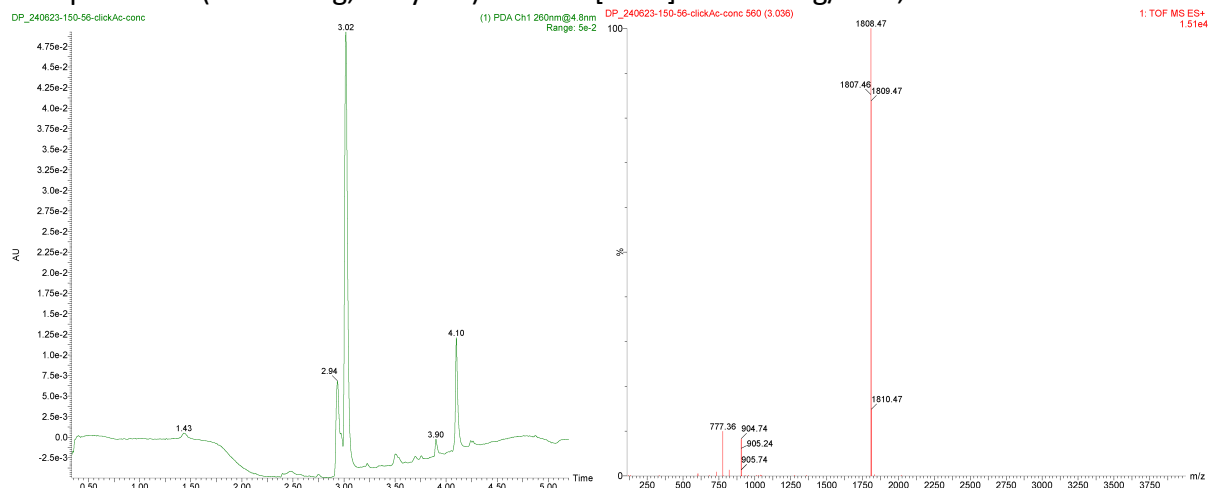

Figure S66: LC-MS chromatogram (left) and the corresponding deconvoluted MS spectra (right) of compound **24**

#### 6.2.4. PLAP (Compounds **29** & **30**)

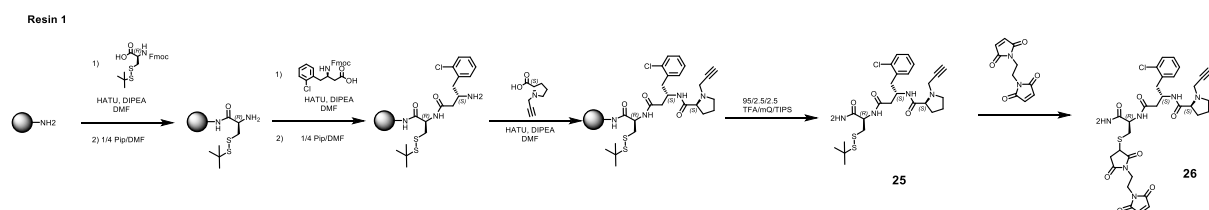

**Synthesis of **26**:** 500 mg of resin **R1** was reacted in repeating amidation and Fmoc deprotection cycles with Fmoc-Cys(StBu)-OH, Fmoc-2-chloro-L-β-homophenylalanine and prop-2-yn-1-yl-L-proline to generate intermediate **25**. The intermediate was cleaved off the resin, precipitated and redissolved in DMSO. 50 μL of intermediate was added to 350 μL DMF, 150 μL 0.5M KH<sub>2</sub>PO<sub>4</sub> pH8 and 50 μL of 160 mM TCEP in 0.5M KH<sub>2</sub>PO<sub>4</sub> pH8. The deprotection was carried out over 1h and checked via LC-MS for completion. Upon completion 100 μL of 160 mM azidobenzoic acid in DMF was added. Reaction was then incubated further for 120 min. 50 μL of 160 mM 1,1'-(ethane-1,2-diyl)bis(1H-pyrrole-2,5-dione) was then added. Reaction was monitored and directly purified via RP-HPLC upon completion to yield **26**.

Compound **25** ( )ESI-MS: [M+H]<sup>+</sup> 539.15 g/mol , found 539.16

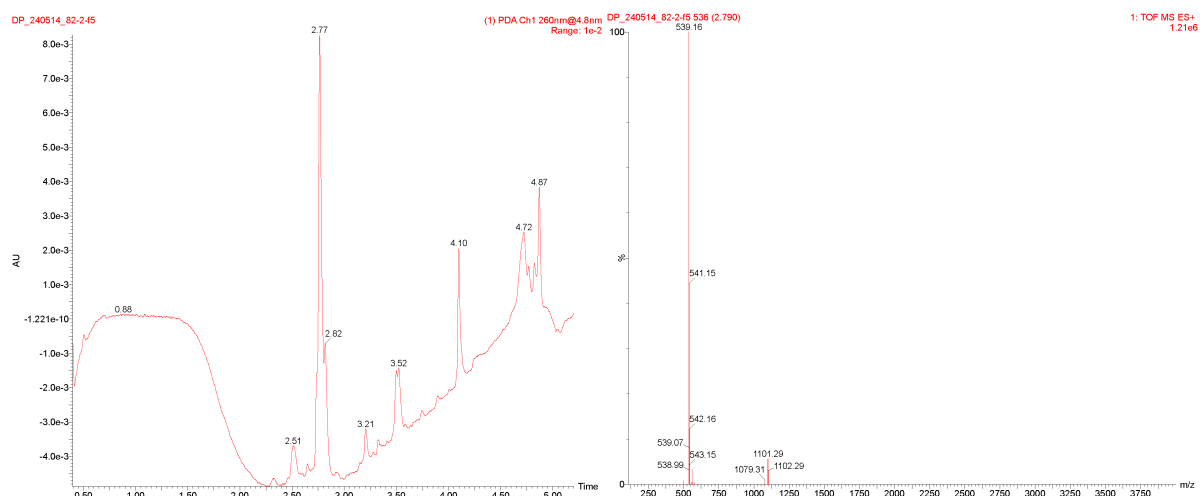

Figure S67: LC-MS chromatogram (left) and the corresponding deconvoluted MS spectra (right) of compound 25

Compound **26** (10 mg)ESI-MS: [M+H]<sup>+</sup> 670.2 g/mol , found 671.18

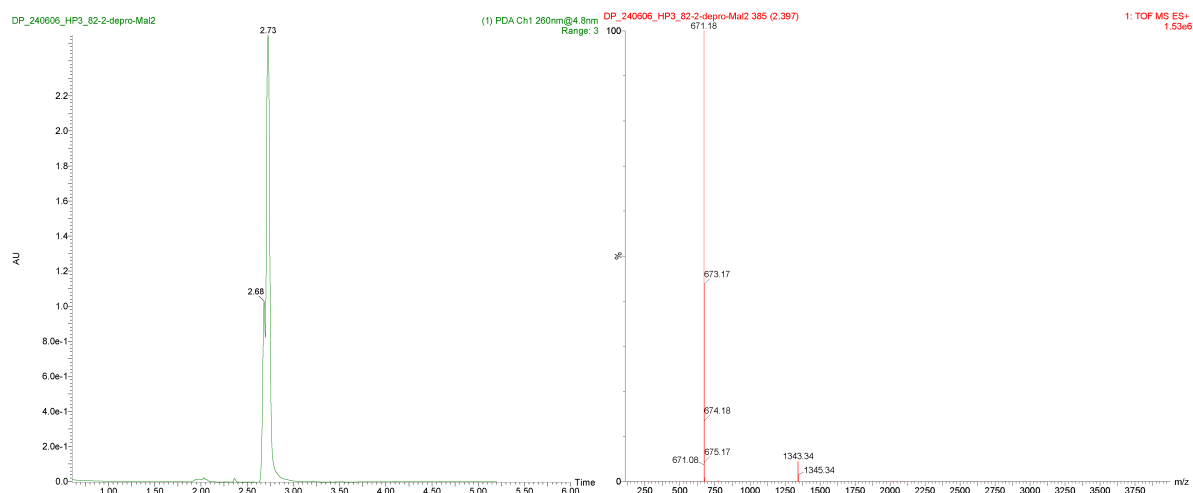

Figure S68: LC-MS chromatogram (left) and the corresponding deconvoluted MS spectra (right) of compound 26

[illegible]

Compound **27** ESI-MS:  $[M+H]^+$  1049.18 g/mol , found 1048.33

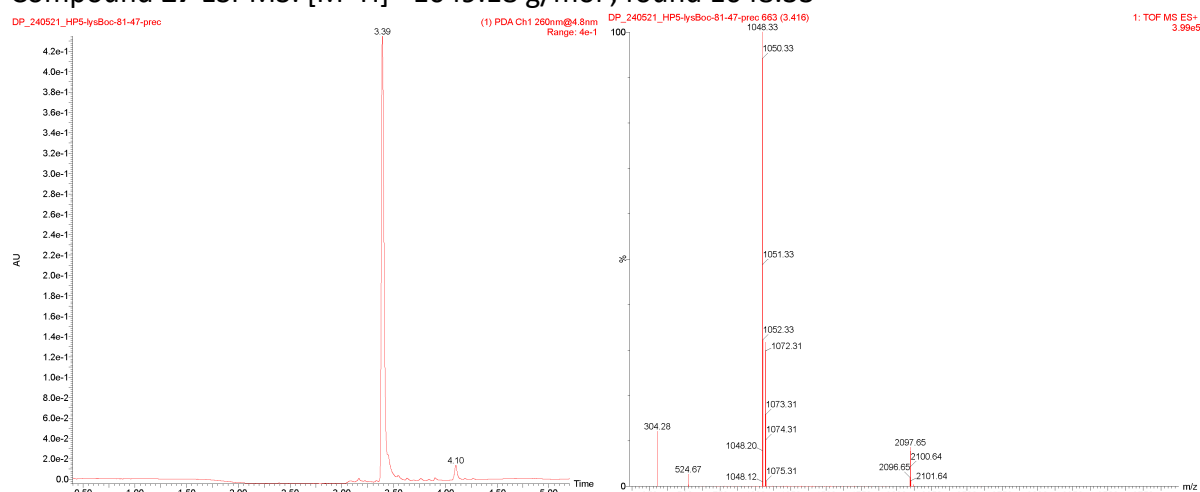

The intermediate was then dissolved in DMSO, to which 1.1 equivalents of Fluorescein-5-Isothiocyanate and 10 equivalents of triethylamine were added. The reaction was monitored via LC-MS and upon completion, piperidine was added and reacted for 15-30 min, before diluted with sodium acetate, methanol and purified via HPLC to yield **28**.

90

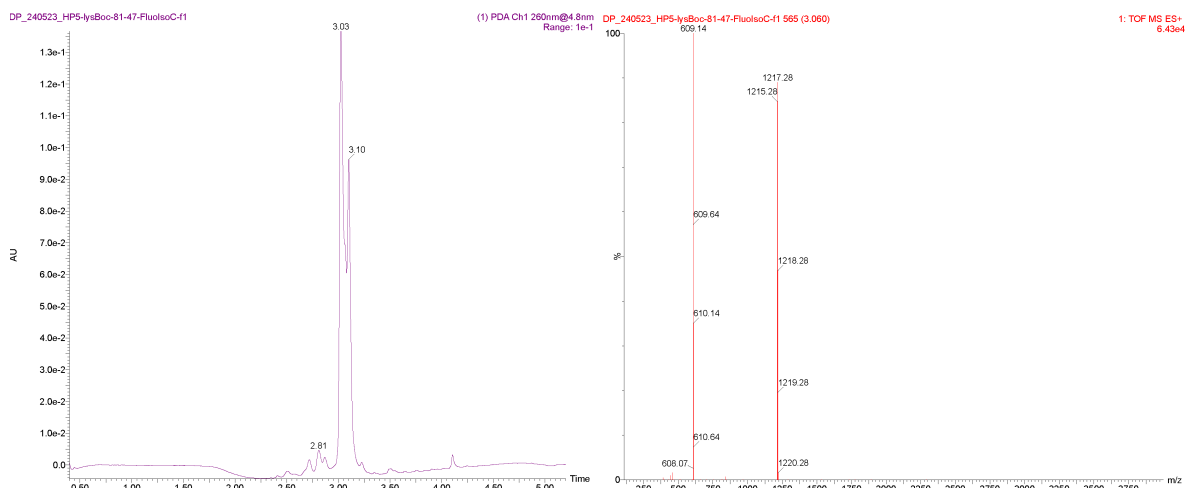

**Figure S70: LC-MS chromatogram (left) and the corresponding deconvoluted MS spectra (right) of compound **28****

1.9 mg compound **28** was dissolved in DMF, treated with TCEP and treated with 2-bromoacetamide according to listed procedures. The compound was then HPLC purified to yield **29**.

Compound **29** (0.24 mg, 12% yield) ESI-MS:  $[M+H]^+$  1183.35 g/mol , found 1184.29

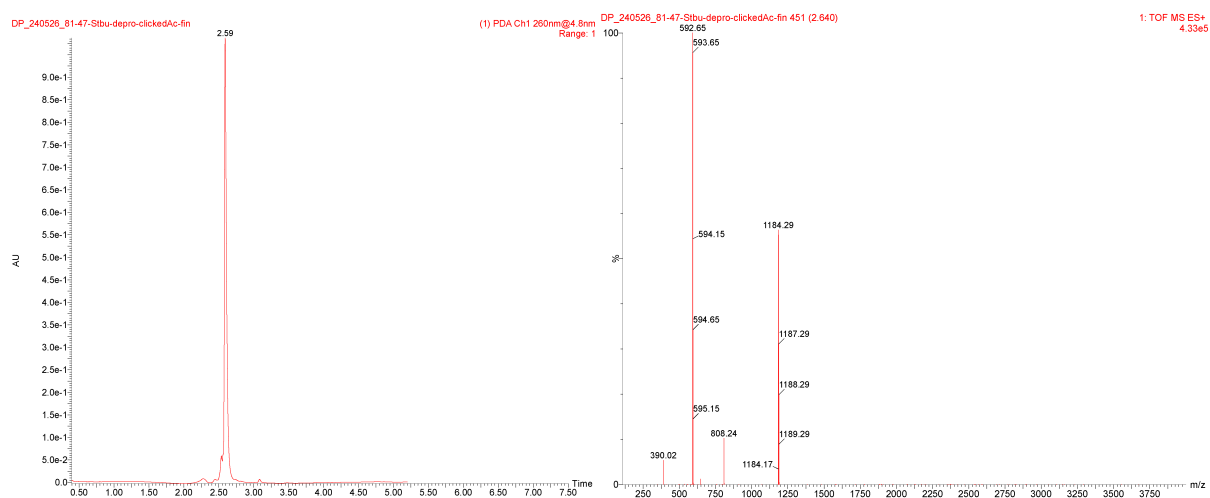

**Figure S71: LC-MS chromatogram (left) and the corresponding deconvoluted MS spectra (right) of compound **29****

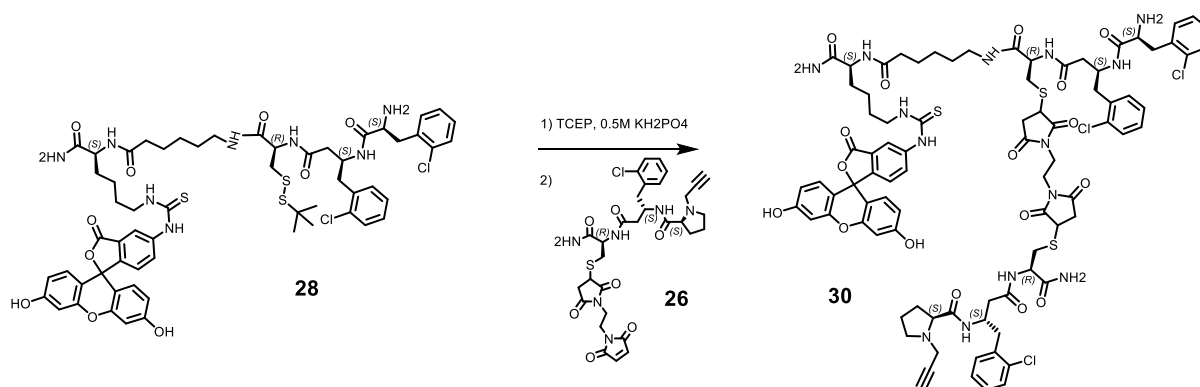

**Synthesis of 30:** 50  $\mu\text{L}$  2 mM of **28** was added to 350  $\mu\text{L}$  DMF, 150  $\mu\text{L}$  0.5M  $\text{KH}_2\text{PO}_4$  pH8 and 50  $\mu\text{L}$  of 160 mM TCEP in 0.5M  $\text{KH}_2\text{PO}_4$  pH8. The deprotection was carried out over 1h and checked via LC-MS for completion. Upon completion 100  $\mu\text{L}$  of 160 mM azidobenzoic acid in DMF was added. Reaction was then incubated further for 120 min. 50  $\mu\text{L}$  of **26** (1.5 equiv.) in DMSO was then added. Reaction was monitored and directly purified via RP-HPLC upon completion to yield **30**.

Compound **30** (0.027 mg, 15% yield) ESI-MS:  $[\text{M}+\text{H}]^+$  1796.52 g/mol, found 1799.48

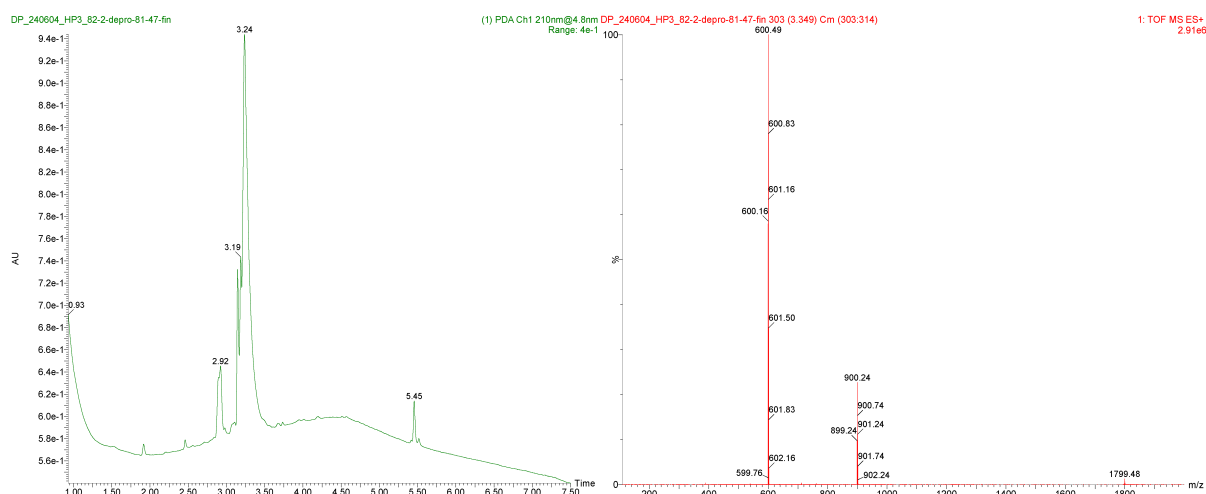

**Figure S72:** LC-MS chromatogram (left) and the corresponding deconvoluted MS spectra (right) of compound **30**

### 6.2.5. Streptavidin (Compounds 34-40)

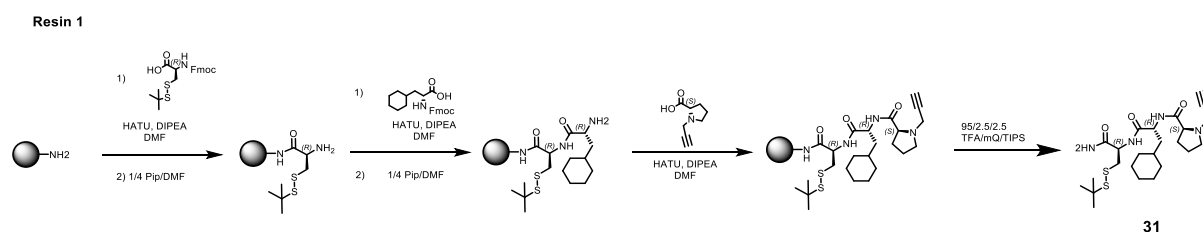

**Synthesis of 31:** 500 mg of resin **R1** was reacted in repeating amidation and Fmoc deprotection cycles with Fmoc-Cys(StBu)-OH, (R)-2-(((9H-fluoren-9-yl)methoxy)carbonyl)amino-3-cyclohexylpropanoic acid and prop-2-yn-1-yl-L-proline to

generate intermediate **31**. The intermediate was cleaved off the resin, precipitated and used as is for resin 2 synthesis of **32**.

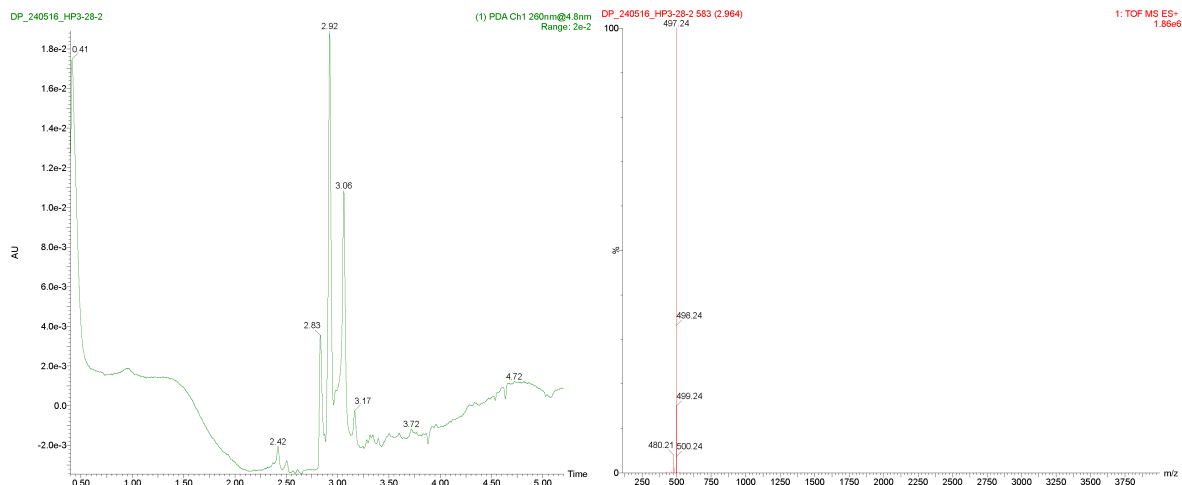

Figure S73: LC-MS chromatogram (left) and the corresponding deconvoluted MS spectra (right) of compound **31**

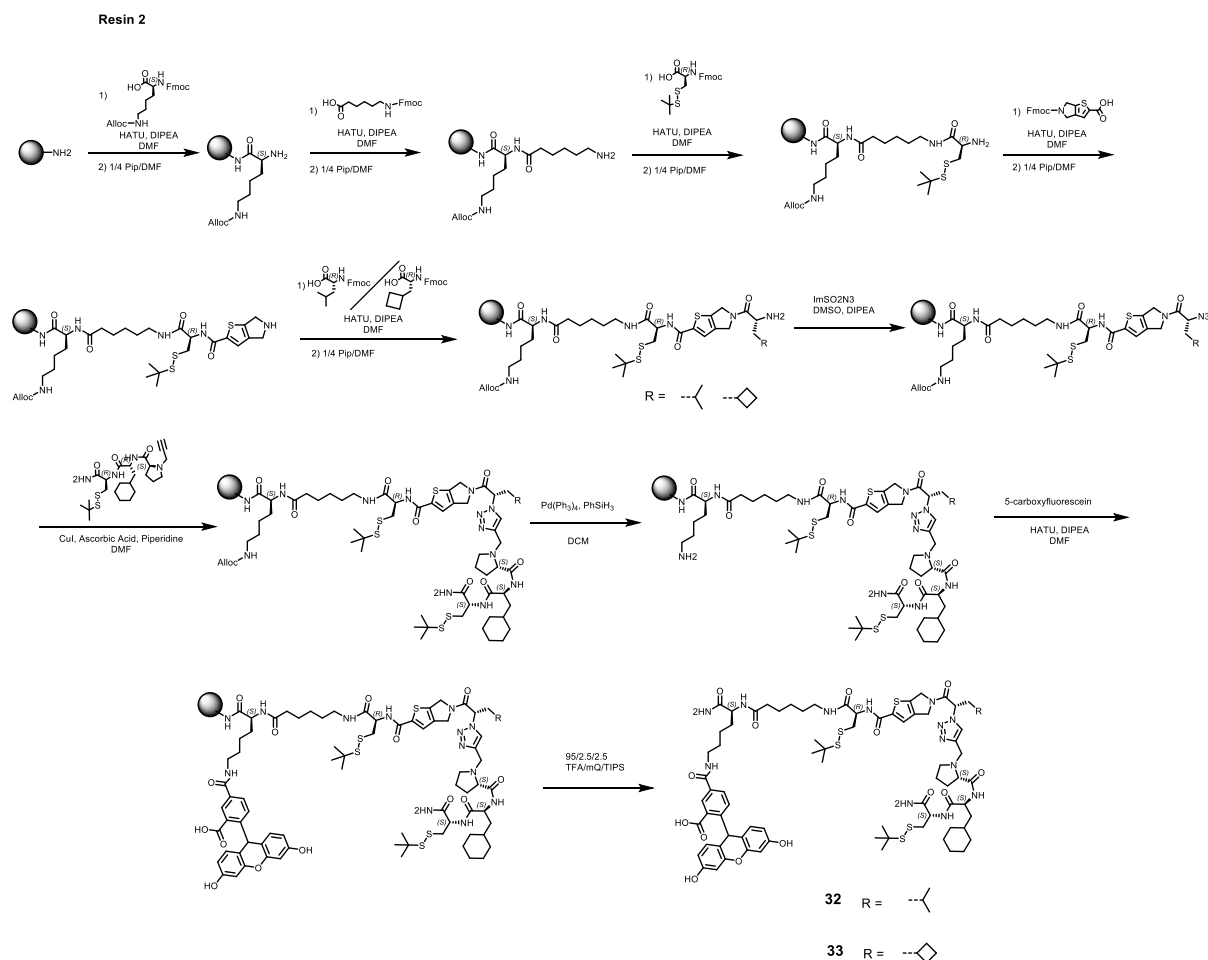

**Synthesis of **32** & **33**:** 500 mg of resin **R1** was reacted in repeating amidation and Fmoc deprotection cycles with Fmoc-Lys(Alloc)-OH, Fmoc-6-Ahx-OH, Fmoc-Cys(StBu)-OH, 5-(((9H-fluoren-9-yl)methoxy)carbonyl)-5,6-dihydro-4H-thieno[2,3-c]pyrrole-2-carboxylic acid and Fmoc-D-Leucine (compd. **32**) or Fmoc- $\beta$ -cyclobutyl-D-Ala-OH (compd. **33**). The terminal amino group was then subjected to a diazotransfer reaction and reacted via CuAAC with

intermediate **31**. The lysine Alloc group was then deprotected and 5-carboxyfluorescein was attached to afford compounds **32** and **33**, which were cleaved off the resin and HPLC purified.

Compound **32** (3.2 mg, 1% yield) ESI-MS:  $[M+H]^+$  1595.65 g/mol , found 1594.65

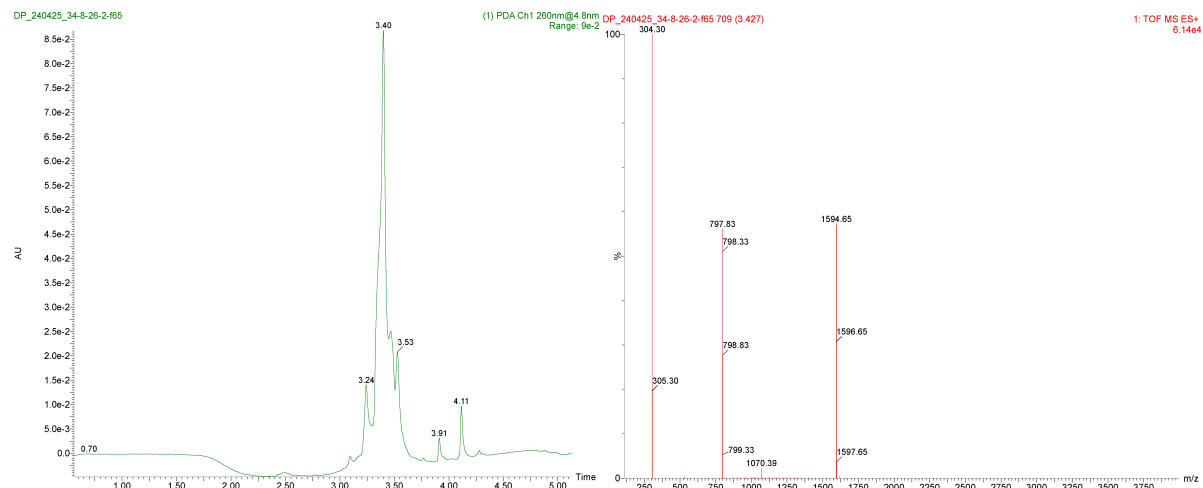

Figure S74: LC-MS chromatogram (left) and the corresponding deconvoluted MS spectra (right) of compound **32**

Compound **33** (2.5 mg, 1% yield) ESI-MS:  $[M+H]^+$  1607.65 g/mol , found

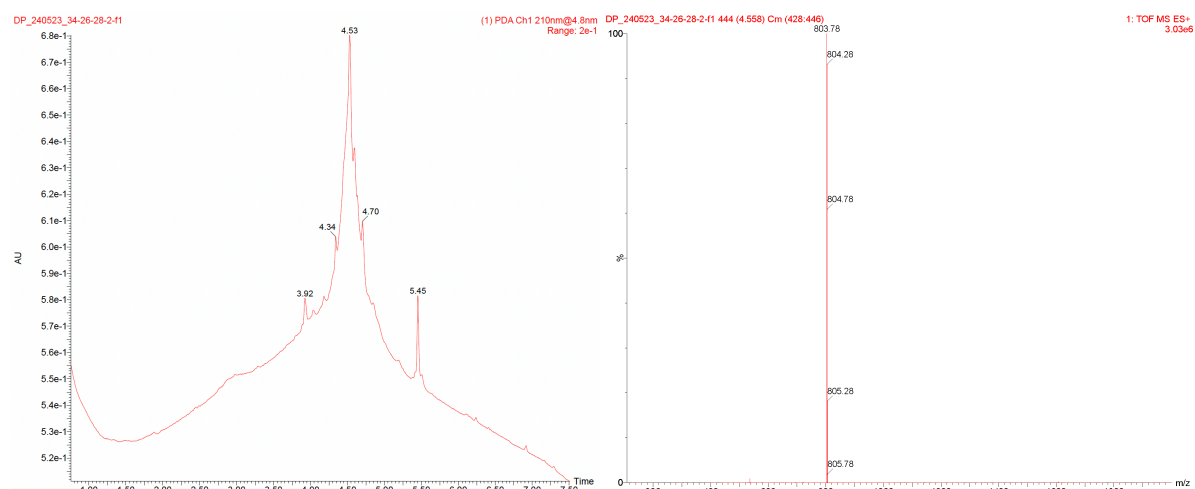

Figure S75: LC-MS chromatogram (left) and the corresponding deconvoluted MS spectra (right) of compound **33**

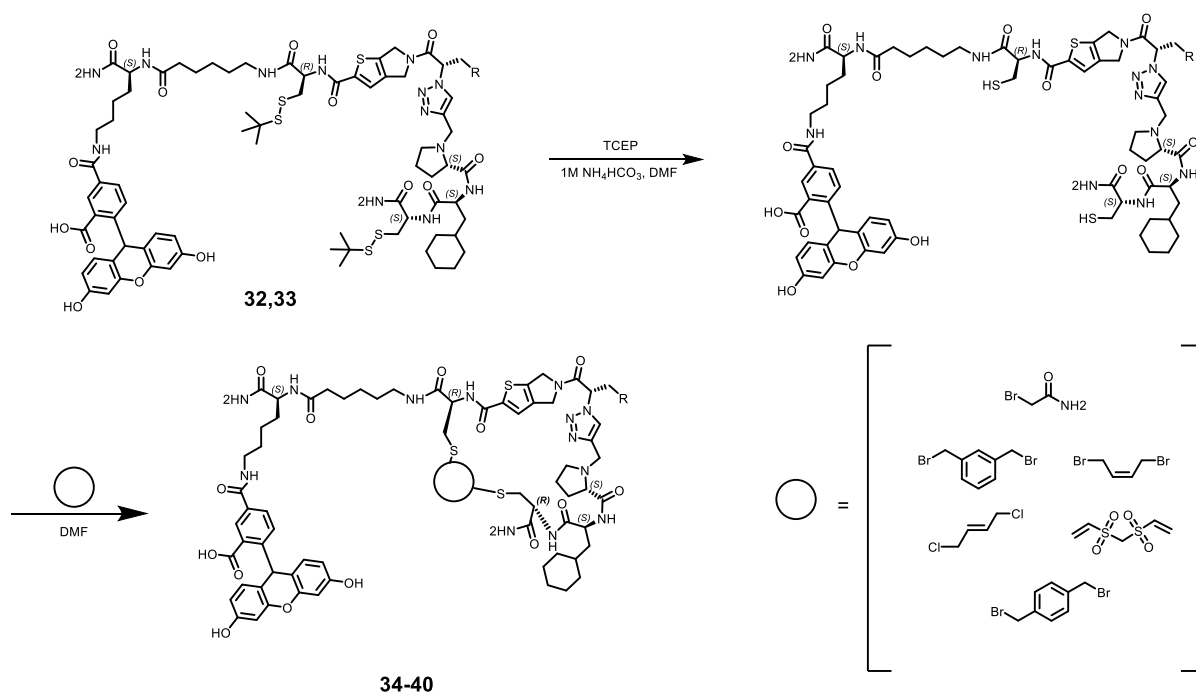

**Synthesis of 34-39:** Compound **32** (50  $\mu$ L, 2.8 mM in DMSO) was treated with TCEP so that the two cysteine Stbu groups were deprotected and the cysteines were reacted with 1 of 6 different electrophiles according to general procedure, to generate 5 different macrocycles **34-38** and one open peptide **39**, which were all HPLC purified.

**Synthesis of 40:** Compound **33** (50  $\mu$ L, 1.6 mM in DMSO) was treated with TCEP so that the two cysteine Stbu groups were deprotected and the cysteines were reacted with 1 electrophile according to general procedure, to one open peptide **40**, which was HPLC purified.

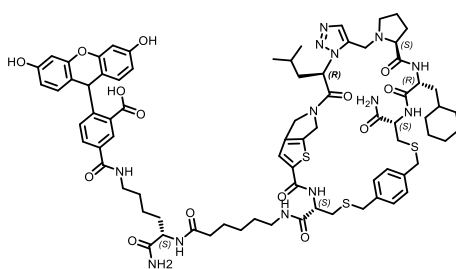

**34**

Compound **34** (0.031 mg, 16% yield) ESI-MS:  $[M+H]^+$  1521.63 g/mol, found 1520.48

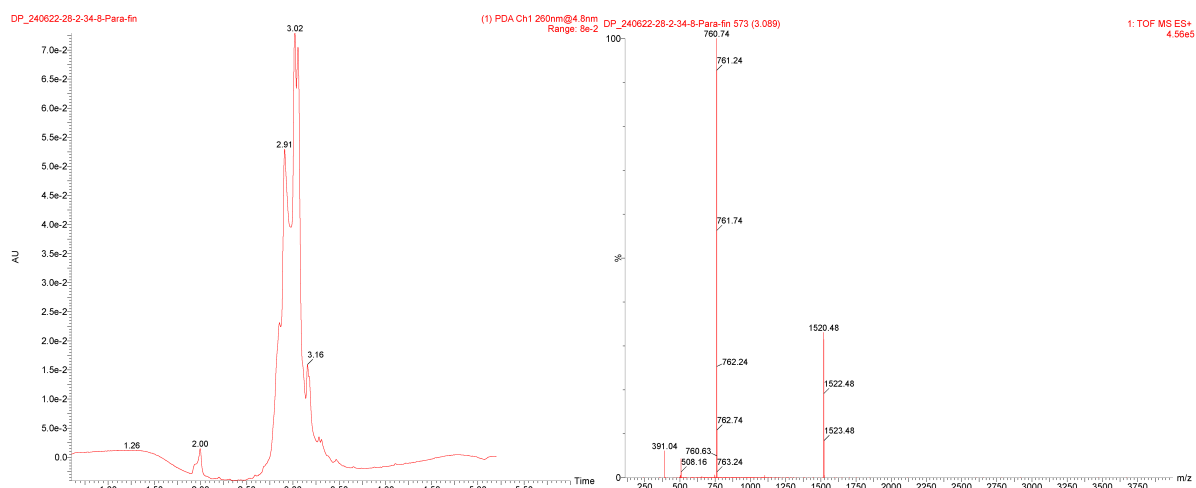

Figure S76: LC-MS chromatogram (left) and the corresponding deconvoluted MS spectra (right) of compound 34

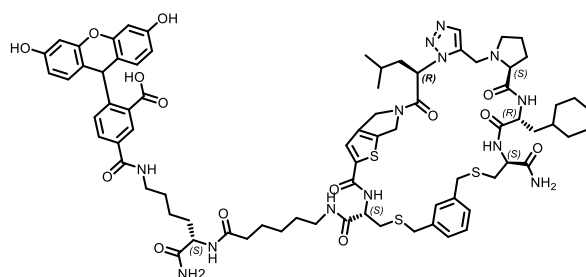

35

Compound 35 (0.0268 mg, 13% yield) ESI-MS:  $[M+H]^+$  1521.63 g/mol, found 1520.46

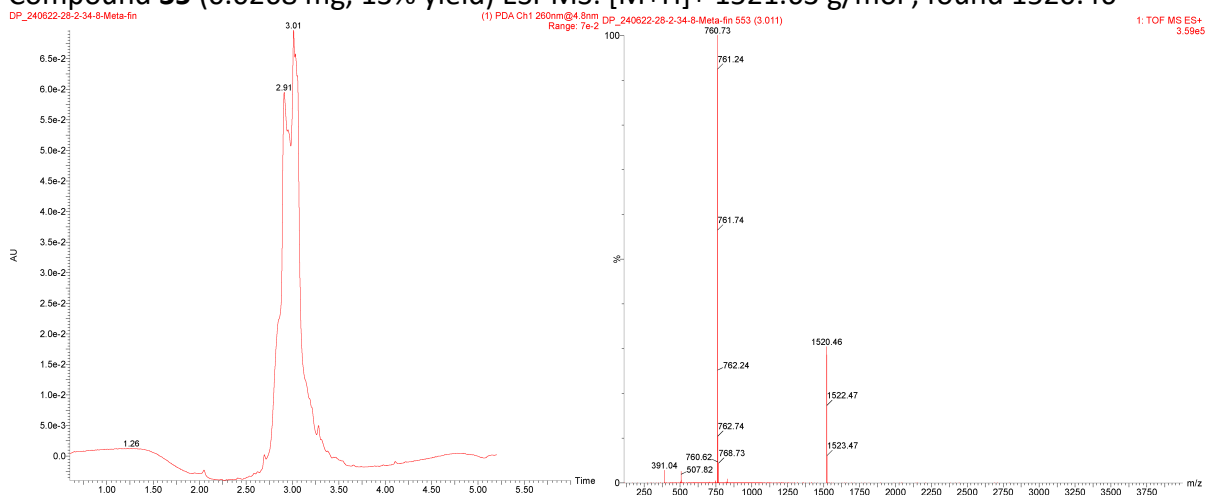

Figure S77: LC-MS chromatogram (left) and the corresponding deconvoluted MS spectra (right) of compound 35

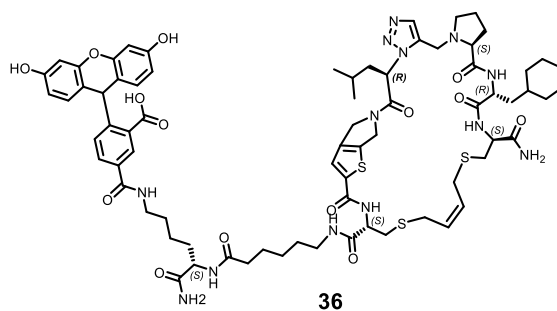

Compound **36** (0.0253 mg, 13% yield) ESI-MS:  $[M+H]^+$  1471.61 g/mol, found 1470.50

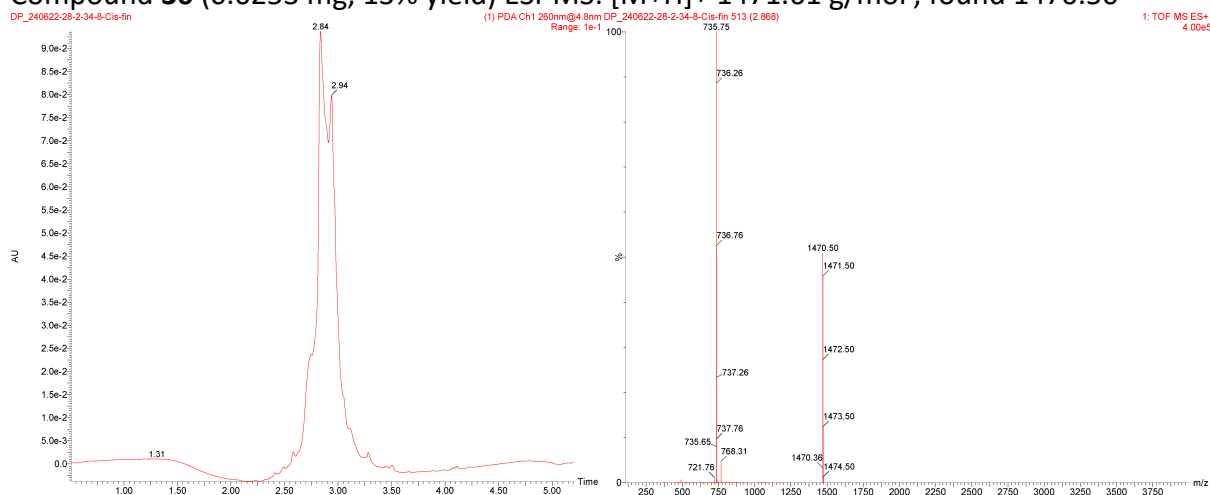

Figure S78: LC-MS chromatogram (left) and the corresponding deconvoluted MS spectra (right) of compound **36**

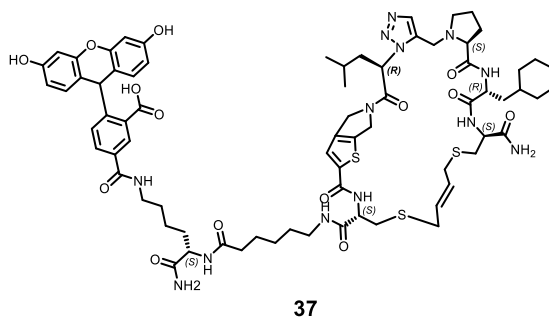

Compound **37** (0.028 mg, 15% yield) ESI-MS:  $[M+H]^+$  1471.61 g/mol, found 1470.48

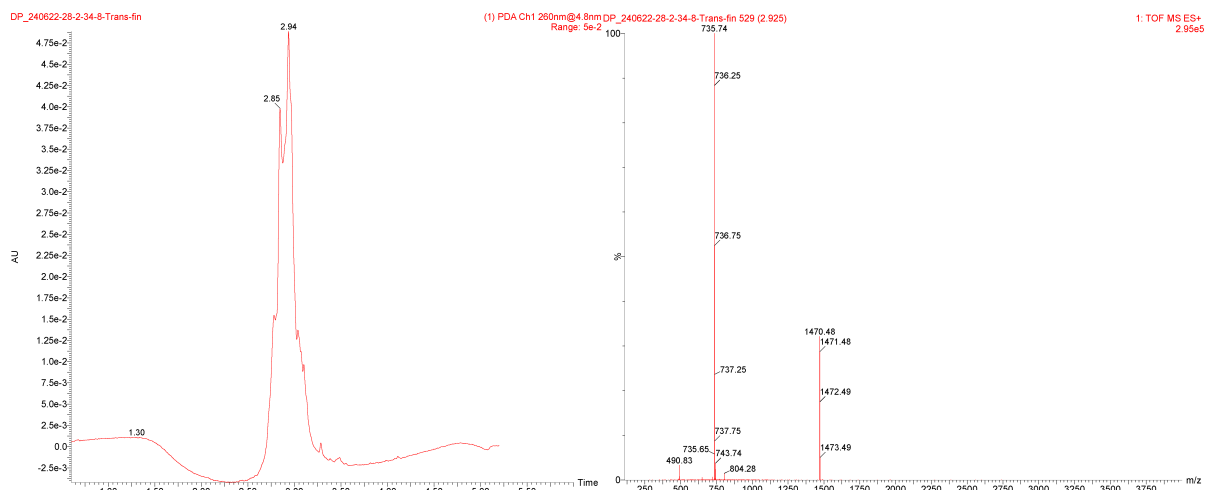

Figure S79: LC-MS chromatogram (left) and the corresponding deconvoluted MS spectra (right) of compound 37

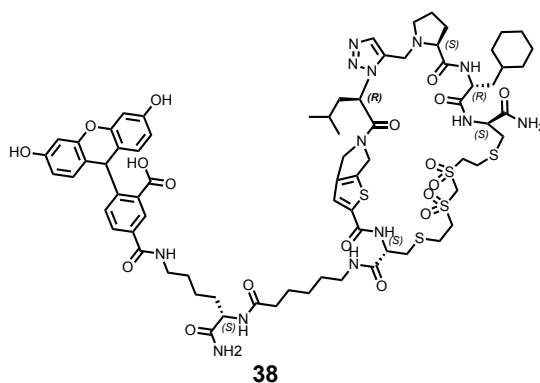

Compound **38** (0.0421 mg, 20% yield) ESI-MS:  $[M+H]^+$  1616.96 g/mol, found 1614.44

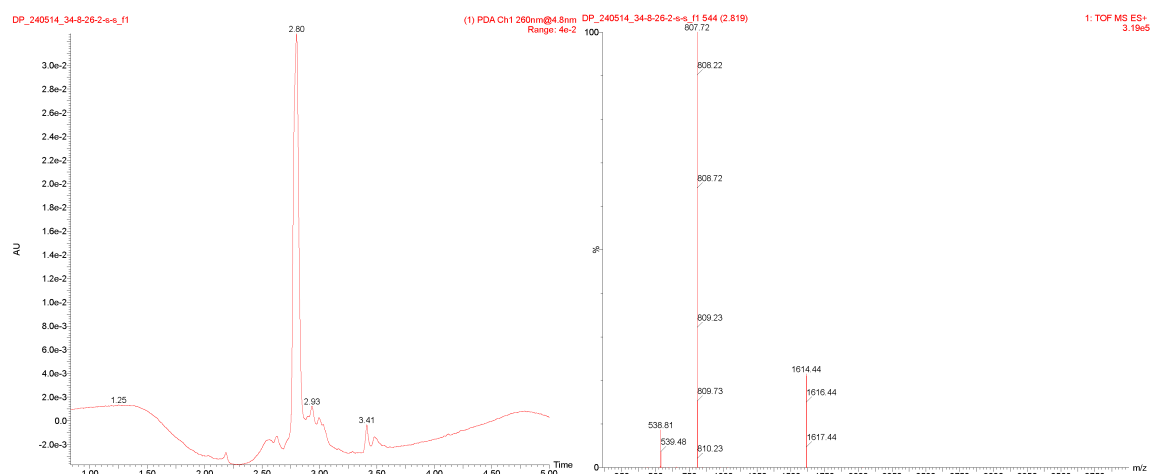

Figure S80: LC-MS chromatogram (left) and the corresponding deconvoluted MS spectra (right) of compound 38

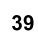

DP\_240514\_34-8-26-2-clicked\_f1

(1) PDA Ch1 260nm@4.8nm DP\_240514\_34-8-26-2-clicked\_f1 499 (2.658)

1: TOF MS ES+  
5.13e5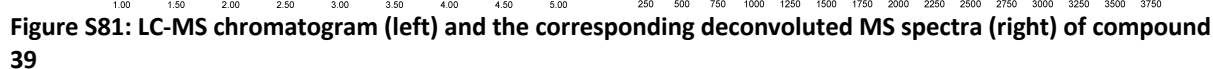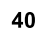

Compound **40** (0.0245 mg, 19% yield) ESI-MS:  $[M+H]^+$  1545.62 g/mol, found 1545.50

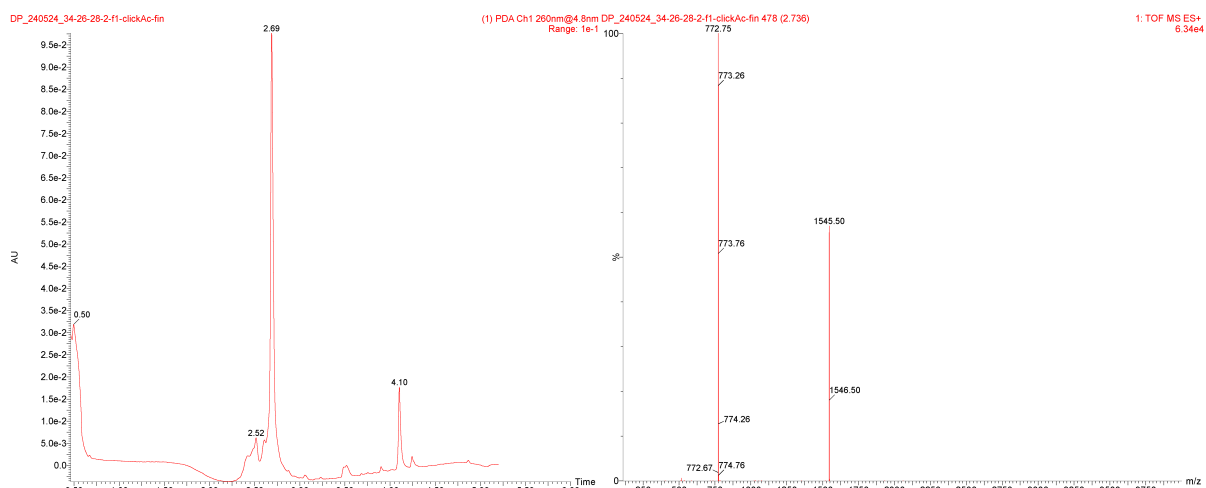

Figure S82: LC-MS chromatogram (left) and the corresponding deconvoluted MS spectra (right) of compound 40

### 6.2.6. Negative Control

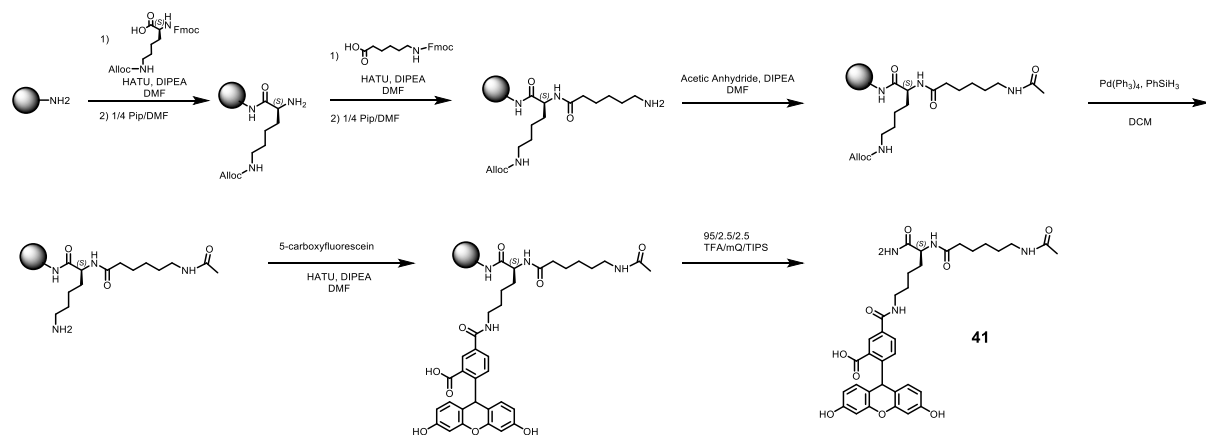

Compound **41** was assembled using H-Rink amide ChemMatrix<sup>®</sup> resin according to procedures in Onda et al.<sup>11</sup>

Compound **41** (21 mg, 31.9% yield) ESI-MS: [M+H]<sup>+</sup> 660.28 g/mol, found 659.27

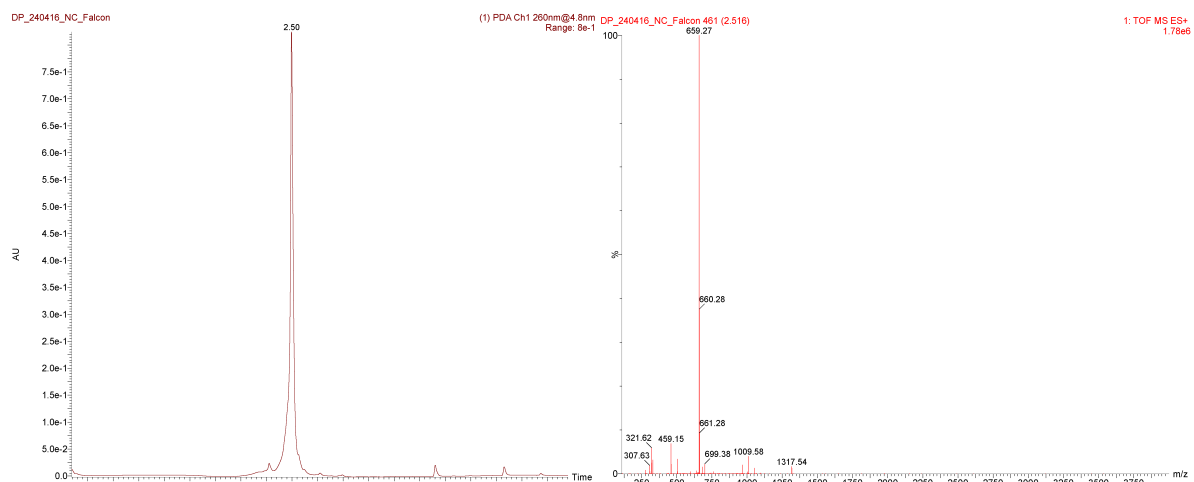

Figure S83: LC-MS chromatogram (left) and the corresponding deconvoluted MS spectra (right) of compound 41

## 7. Hit Validation

### 7.1. Fluorescence Polarization

#### Protocol

LNA5 and LNA3 conjugates were hybridized by mixing 25  $\mu\text{L}$  of LNA5 (2  $\mu\text{M}$ ) and 25  $\mu\text{L}$  of LNA3 (2  $\mu\text{M}$ ) conjugates in mQ and heating to 70  $^{\circ}\text{C}$  for 5-10 min. After cooling down the solution to room temperature, 950  $\mu\text{L}$  of 1x PBS was added to the LNA solution. The hybridized LNA conjugates were then tested via fluorescence polarization experiment.

If the LNA conjugates were clicked together, they were diluted to 1  $\mu\text{M}$ , 50  $\mu\text{L}$  of a clicked conjugate could then be taken, diluted with 950  $\mu\text{L}$  1x PBS and tested via fluorescence polarization experiment.

All other off-DNA fluoresceinated compounds were diluted to 50 nM in 1xPBS containing 5% DMSO.

Separately, a 16-point serial dilution of protein was performed in PBS in PCR tubes. 4  $\mu\text{L}$  of the 50 nM conjugate was mixed with 4  $\mu\text{L}$  of each protein dilution in black 384-well plates to a final volume of 8  $\mu\text{L}$ . The plate was incubated for 30 min in the dark and centrifuged briefly to remove bubbles. Fluorescence anisotropy was measured at 535 nm. Data was obtained and fitted using Prism 10.

#### Raw Data

**Table S17: Raw data from main text figure 3**

| Molar    | 1 Open |     |     | 1 Closed |     |     | Control |     |     |
|----------|--------|-----|-----|----------|-----|-----|---------|-----|-----|
| 0.00002  | 311    | 322 |     | 315      | 317 | 318 | 197     | 199 | 201 |
| 0.00001  | 298    | 313 |     | 314      | 314 | 299 | 185     | 194 | 189 |
| 0.000005 | 283    | 298 |     | 302      | 302 | 292 | 187     | 186 | 184 |
| 2.5E-06  | 254    | 281 |     | 294      | 293 | 289 | 179     | 180 | 176 |
| 1.25E-06 | 239    | 256 |     | 274      | 290 | 267 | 173     | 177 | 173 |
| 6.25E-07 | 230    | 236 |     | 256      | 274 | 257 | 173     | 175 | 168 |
| 3.13E-07 | 219    | 228 |     | 242      | 248 | 242 | 172     | 171 | 171 |
| 1.56E-07 | 219    | 221 |     | 235      | 241 | 235 | 168     | 173 | 175 |
| 7.81E-08 | 214    | 215 |     | 225      | 231 | 223 | 171     | 171 | 170 |
| 3.91E-08 | 213    | 216 |     | 224      | 241 | 218 | 170     | 156 | 168 |
| 1.95E-08 | 215    | 223 |     | 218      | 236 | 221 | 169     | 171 | 170 |
| 9.77E-09 | 213    | 225 |     | 215      | 223 | 219 | 170     | 168 | 168 |
| 4.88E-09 | 213    | 223 |     | 210      | 222 | 216 | 171     | 173 | 169 |
| 2.44E-09 | 214    | 225 |     | 211      | 221 | 210 | 167     | 169 | 165 |
| 1.22E-09 | 213    | 216 |     | 210      | 224 | 218 | 170     | 172 | 173 |
| 6.1E-10  | 213    | 215 |     | 212      | 208 | 209 | 164     | 164 | 164 |
| Molar    | 2 Open |     |     | 2 Closed |     |     | Control |     |     |
| 0.00002  | 290    | 292 | 296 | 300      | 292 | 300 | 197     | 199 | 201 |
| 0.00001  | 280    | 282 | 288 | 298      | 300 | 292 | 185     | 194 | 189 |
| 0.000005 | 273    | 274 | 276 | 283      | 273 | 275 | 187     | 186 | 184 |
| 2.5E-06  | 254    | 256 | 260 | 268      | 271 | 267 | 179     | 180 | 176 |
| 1.25E-06 | 239    | 240 | 242 | 254      | 252 | 253 | 173     | 177 | 173 |
| 6.25E-07 | 222    | 222 | 224 | 233      | 237 | 246 | 173     | 175 | 168 |
| 3.13E-07 | 216    | 217 | 218 | 230      | 229 | 227 | 172     | 171 | 171 |
| 1.56E-07 | 209    | 213 | 209 | 222      | 221 | 215 | 168     | 173 | 175 |
| 7.81E-08 | 209    | 210 | 208 | 215      | 209 | 212 | 171     | 171 | 170 |
| 3.91E-08 | 208    | 213 | 210 | 221      | 224 | 206 | 170     | 156 | 168 |

|          |        |     |     |          |     |     |         |     |     |
|----------|--------|-----|-----|----------|-----|-----|---------|-----|-----|
| 1.95E-08 | 206    | 210 | 209 | 211      | 217 | 207 | 169     | 171 | 170 |
| 9.77E-09 | 206    | 209 | 209 | 209      | 213 | 202 | 170     | 168 | 168 |
| 4.88E-09 | 207    | 208 | 209 | 206      | 215 | 207 | 171     | 173 | 169 |
| 2.44E-09 | 207    | 210 | 211 | 206      | 215 | 204 | 167     | 169 | 165 |
| 1.22E-09 | 207    | 209 | 211 | 202      | 200 | 207 | 170     | 172 | 173 |
| 6.1E-10  | 206    | 208 | 211 | 200      | 205 | 200 | 164     | 164 | 164 |
| Molar    | 3 Open |     |     | 3 Closed |     |     | Control |     |     |
| 0.00002  | 357    | 358 | 357 | 316      | 313 | 314 | 197     | 199 | 201 |
| 0.00001  | 358    | 355 | 348 | 312      | 308 | 314 | 185     | 194 | 189 |
| 0.000005 | 339    | 341 | 334 | 305      | 307 | 308 | 187     | 186 | 184 |
| 2.5E-06  | 321    | 326 | 317 | 299      | 299 | 299 | 179     | 180 | 176 |
| 1.25E-06 | 301    | 306 | 300 | 282      | 285 | 279 | 173     | 177 | 173 |
| 6.25E-07 | 290    | 287 | 279 | 269      | 277 | 271 | 173     | 175 | 168 |
| 3.13E-07 | 269    | 270 | 269 | 265      | 267 | 263 | 172     | 171 | 171 |
| 1.56E-07 | 261    | 264 | 266 | 261      | 260 | 260 | 168     | 173 | 175 |
| 7.81E-08 | 258    | 258 | 256 | 258      | 258 | 258 | 171     | 171 | 170 |
| 3.91E-08 | 256    | 256 | 254 | 262      | 258 | 254 | 170     | 156 | 168 |
| 1.95E-08 | 253    | 256 | 259 | 260      | 258 | 258 | 169     | 171 | 170 |
| 9.77E-09 | 258    | 258 | 258 | 254      | 257 | 264 | 170     | 168 | 168 |
| 4.88E-09 | 253    | 261 | 251 | 261      | 257 | 264 | 171     | 173 | 169 |
| 2.44E-09 | 261    | 259 | 257 | 255      | 263 | 259 | 167     | 169 | 165 |
| 1.22E-09 | 259    | 261 | 255 | 258      | 259 | 257 | 170     | 172 | 173 |
| 6.1E-10  | 258    | 255 | 257 | 257      | 250 | 252 | 164     | 164 | 164 |

**Table S18: Raw data from main text figure 5 (non-normalized)**

| Molar    | 9   |     |     | 10  |     |     | 11  |     |     | 12  |     |     | 13  |     |     | 14  |     |     | Control |     |     |
|----------|-----|-----|-----|-----|-----|-----|-----|-----|-----|-----|-----|-----|-----|-----|-----|-----|-----|-----|---------|-----|-----|
| 0.000024 | 386 | 382 | 352 | 384 | 379 | 383 | 293 | 290 | 292 | 260 | 261 | 264 | 393 | 391 | 393 | 335 | 334 | 331 | 171     | 171 | 168 |
| 0.000012 | 369 | 368 | 359 | 366 | 362 | 360 | 279 | 279 | 281 | 249 | 251 | 246 | 380 | 375 | 376 | 315 | 310 | 303 | 161     | 163 | 163 |
| 0.000006 | 350 | 350 | 335 | 333 | 334 | 335 | 266 | 267 | 262 | 236 | 230 | 235 | 365 | 371 | 365 | 253 | 274 | 275 | 158     | 157 | 159 |
| 0.000003 | 331 | 322 | 315 | 293 | 286 | 287 | 251 | 247 | 248 | 231 | 224 | 224 | 346 | 338 | 341 | 255 | 252 | 252 | 158     | 155 | 158 |
| 1.5E-06  | 303 | 305 | 297 | 273 | 273 | 270 | 235 | 231 | 237 | 227 | 226 | 224 | 326 | 319 | 318 | 225 | 225 | 222 | 161     | 157 | 160 |
| 7.5E-07  | 288 | 285 | 281 | 244 | 233 | 239 | 227 | 231 | 224 | 227 | 222 | 224 | 305 | 290 | 288 | 224 | 221 | 216 | 159     | 160 | 161 |
| 3.75E-07 | 272 | 270 | 271 | 255 | 249 | 245 | 227 | 223 | 220 | 224 | 217 | 223 | 285 | 280 | 269 | 213 | 212 | 215 | 160     | 160 | 163 |
| 1.88E-07 | 255 | 265 | 262 | 249 | 240 | 243 | 230 | 225 | 223 | 225 | 216 | 220 | 261 | 246 | 249 | 214 | 211 | 214 | 162     | 162 | 162 |
| 9.38E-08 | 247 | 248 | 254 | 241 | 238 | 236 | 215 | 223 | 217 | 219 | 219 | 216 | 256 | 249 | 249 | 210 | 210 | 221 | 161     | 162 | 161 |
| 4.69E-08 | 245 | 254 | 244 | 240 | 237 | 241 | 218 | 218 | 218 | 219 | 218 | 212 | 248 | 249 | 246 | 212 | 202 | 203 | 163     | 162 | 161 |
| 2.34E-08 | 240 | 246 | 243 | 244 | 240 | 241 | 222 | 219 | 222 | 225 | 216 | 216 | 246 | 249 | 247 | 210 | 210 | 227 | 163     | 162 | 162 |
| 1.17E-08 | 244 | 247 | 244 | 237 | 235 | 239 | 220 | 218 | 218 | 225 | 221 | 214 | 243 | 243 | 244 | 210 | 206 | 209 | 159     | 158 | 158 |
| 5.86E-09 | 239 | 244 | 241 | 240 | 240 | 241 | 213 | 221 | 221 | 218 | 215 | 219 | 245 | 235 | 238 | 223 | 225 | 224 | 161     | 163 | 162 |
| 2.93E-09 | 243 | 242 | 244 | 239 | 238 | 244 | 218 | 217 | 218 | 226 | 216 | 218 | 245 | 237 | 240 | 219 | 216 | 218 | 163     | 161 | 162 |
| 1.46E-09 | 240 | 240 | 246 | 241 | 241 | 240 | 216 | 217 | 218 | 224 | 216 | 221 | 251 | 250 | 247 | 218 | 215 | 217 | 165     | 163 | 161 |
| 7.32E-10 | 243 | 244 | 240 | 238 | 239 | 237 | 214 | 214 | 214 | 221 | 216 | 217 | 248 | 241 | 243 | 220 | 215 | 222 | 161     | 162 | 162 |

| Molar    | 15  |     |     | 10  |     |     | 16  |     |     | 17  |     |     |
|----------|-----|-----|-----|-----|-----|-----|-----|-----|-----|-----|-----|-----|
| 0.000024 | 396 | 396 | 403 | 425 | 420 | 387 | 383 | 385 | 387 | 367 | 354 | 360 |
| 0.000012 | 395 | 391 | 397 | 406 | 405 | 395 | 378 | 379 | 385 | 369 | 359 | 359 |
| 0.000006 | 377 | 379 | 381 | 385 | 385 | 368 | 365 | 372 | 373 | 360 | 344 | 349 |
| 0.000003 | 355 | 351 | 355 | 364 | 354 | 347 | 339 | 348 | 338 | 347 | 335 | 337 |
| 1.5E-06  | 313 | 312 | 309 | 333 | 335 | 327 | 318 | 319 | 324 | 331 | 328 | 334 |
| 7.5E-07  | 276 | 268 | 258 | 317 | 313 | 309 | 280 | 290 | 294 | 314 | 319 | 308 |
| 3.75E-07 | 247 | 245 | 242 | 299 | 297 | 298 | 262 | 263 | 267 | 285 | 293 | 302 |
| 1.88E-07 | 227 | 226 | 219 | 281 | 292 | 288 | 241 | 248 | 281 | 260 | 278 | 281 |
| 9.38E-08 | 214 | 220 | 211 | 272 | 273 | 279 | 235 | 238 | 271 | 236 | 268 | 270 |
| 4.69E-08 | 201 | 199 | 207 | 269 | 279 | 268 | 233 | 231 | 248 | 238 | 253 | 245 |
| 2.34E-08 | 203 | 201 | 206 | 264 | 271 | 267 | 230 | 232 | 259 | 232 | 243 | 253 |
| 1.17E-08 | 212 | 207 | 207 | 268 | 272 | 268 | 223 | 223 | 234 | 233 | 246 | 243 |
| 5.86E-09 | 212 | 212 | 205 | 263 | 268 | 265 | 231 | 227 | 232 | 228 | 240 | 243 |
| 2.93E-09 | 212 | 211 | 210 | 267 | 266 | 268 | 226 | 229 | 233 | 234 | 248 | 239 |
| 1.46E-09 | 210 | 213 | 205 | 264 | 264 | 271 | 224 | 226 | 231 | 237 | 243 | 249 |
| 7.32E-10 | 214 | 209 | 210 | 267 | 268 | 264 | 227 | 230 | 232 | 235 | 235 | 234 |

| Molar    | 18  |     |     | 12  |     |     | 19  |     |     | 20  |     |     |
|----------|-----|-----|-----|-----|-----|-----|-----|-----|-----|-----|-----|-----|
| 0.000024 | 434 | 436 | 433 | 393 | 391 | 393 | 397 | 393 | 373 | 374 | 371 | 373 |
| 0.000012 | 412 | 414 | 417 | 380 | 375 | 376 | 388 | 392 | 352 | 371 | 368 | 372 |
| 0.000006 | 400 | 399 | 400 | 365 | 371 | 365 | 378 | 382 | 361 | 364 | 359 | 359 |
| 0.000003 | 348 | 346 | 340 | 346 | 338 | 341 | 367 | 363 | 343 | 344 | 334 | 331 |
| 1.5E-06  | 329 | 328 | 324 | 326 | 319 | 318 | 338 | 341 | 332 | 327 | 316 | 312 |
| 7.5E-07  | 290 | 289 | 296 | 305 | 290 | 288 | 304 | 300 | 309 | 289 | 287 | 291 |
| 3.75E-07 | 267 | 266 | 271 | 285 | 280 | 269 | 282 | 279 | 268 | 278 | 268 | 273 |
| 1.88E-07 | 252 | 247 | 254 | 261 | 246 | 249 | 260 | 262 | 265 | 262 | 253 | 264 |

|          |     |     |     |     |     |     |     |     |     |     |     |     |
|----------|-----|-----|-----|-----|-----|-----|-----|-----|-----|-----|-----|-----|
| 9.38E-08 | 231 | 236 | 232 | 256 | 249 | 249 | 251 | 252 | 260 | 260 | 251 | 256 |
| 4.69E-08 | 221 | 221 | 222 | 248 | 249 | 246 | 248 | 248 | 252 | 258 | 255 | 257 |
| 2.34E-08 | 233 | 228 | 224 | 246 | 249 | 247 | 253 | 252 | 254 | 256 | 260 | 255 |
| 1.17E-08 | 219 | 219 | 239 | 243 | 243 | 244 | 251 | 248 | 251 | 256 | 256 | 255 |
| 5.86E-09 | 238 | 234 | 236 | 245 | 235 | 238 | 249 | 245 | 256 | 263 | 252 | 257 |
| 2.93E-09 | 240 | 233 | 239 | 245 | 237 | 240 | 245 | 243 | 257 | 254 | 253 | 255 |
| 1.46E-09 | 232 | 236 | 238 | 251 | 250 | 247 | 247 | 246 | 247 | 257 | 254 | 256 |

**Table S19: Raw data from main text figure 4**

| Molar    | 5 Open |     |     | 5 Clicked |     |     | 6 Open |     |     | 6 Clicked |     |     | Control |     |     |
|----------|--------|-----|-----|-----------|-----|-----|--------|-----|-----|-----------|-----|-----|---------|-----|-----|
| 4.75E-06 | 341    | 337 | 336 | 347       | 353 | 340 | 349    | 354 | 356 | 355       | 363 | 359 | 258     | 249 | 247 |
| 2.38E-06 | 313    | 307 | 307 | 353       | 361 | 354 | 328    | 322 | 325 | 370       | 372 | 368 | 249     | 249 | 249 |
| 1.19E-06 | 288    | 287 | 286 | 346       | 344 | 356 | 299    | 301 | 299 | 363       | 371 | 365 | 255     | 248 | 247 |
| 5.94E-07 | 266    | 276 | 275 | 353       | 352 | 347 | 283    | 276 | 278 | 362       | 357 | 364 | 248     | 249 | 247 |
| 2.97E-07 | 270    | 271 | 267 | 336       | 340 | 331 | 274    | 278 | 276 | 353       | 368 | 348 | 253     | 224 | 259 |
| 1.48E-07 | 267    | 259 | 259 | 338       | 339 | 331 | 266    | 264 | 265 | 354       | 347 | 350 | 249     | 248 | 250 |
| 7.42E-08 | 256    | 254 | 258 | 320       | 320 | 325 | 263    | 266 | 263 | 349       | 336 | 327 | 250     | 249 | 253 |
| 3.71E-08 | 257    | 256 | 255 | 308       | 317 | 311 | 259    | 259 | 266 | 327       | 323 | 315 | 245     | 240 | 249 |
| 1.86E-08 | 256    | 255 | 257 | 302       | 306 | 303 | 267    | 263 | 262 | 315       | 300 | 316 | 246     | 249 | 247 |
| 9.28E-09 | 259    | 254 | 252 | 296       | 292 | 284 | 261    | 260 | 259 | 303       | 298 | 304 | 246     | 249 | 248 |
| 4.64E-09 | 253    | 259 | 260 | 286       | 281 | 291 | 263    | 266 | 266 | 295       | 298 | 298 | 251     | 247 | 251 |
| 2.32E-09 | 261    | 257 | 259 | 286       | 289 | 299 | 267    | 268 | 264 | 293       | 297 | 292 | 250     | 248 | 253 |
| 1.16E-09 | 260    | 254 | 252 | 289       | 279 | 289 | 264    | 265 | 262 | 287       | 293 | 295 | 249     | 249 | 254 |
| 5.8E-10  | 255    | 254 | 255 | 274       | 278 | 286 | 259    | 264 | 267 | 292       | 290 | 279 | 244     | 246 | 255 |
| 2.9E-10  | 252    | 257 | 250 | 284       | 284 | 294 | 259    | 266 | 266 | 281       | 280 | 287 | 243     | 249 | 254 |

| Molar    | 8-L0 vs. Streptavidin |     |     | 8-L0 vs. Neutravidin |     |     | 8-L0 vs. Avidin |     |     | 7-L0 vs. Streptavidin |     |  | 7-L0 vs. Neutravidin |     |     | 7-L0 vs. Avidin |     |     |
|----------|-----------------------|-----|-----|----------------------|-----|-----|-----------------|-----|-----|-----------------------|-----|--|----------------------|-----|-----|-----------------|-----|-----|
| 9.5E-06  | 209                   | 208 | 211 | 154                  | 155 | 153 | 150             | 148 | 151 | 232                   | 230 |  | 149                  | 149 | 148 | 146             | 145 | 149 |
| 4.75E-06 | 205                   | 206 | 204 | 151                  | 151 | 150 | 151             | 151 | 150 | 229                   | 225 |  | 147                  | 148 | 146 | 146             | 147 | 149 |
| 2.38E-06 | 201                   | 202 | 206 | 152                  | 148 | 149 | 148             | 149 | 149 | 221                   | 212 |  | 144                  | 143 | 142 | 144             | 141 | 146 |
| 1.19E-06 | 198                   | 207 | 199 | 150                  | 147 | 147 | 148             | 150 | 148 | 216                   | 207 |  | 141                  | 143 | 144 | 145             | 142 | 145 |
| 5.94E-07 | 201                   | 198 | 195 | 149                  | 148 | 149 | 152             | 150 | 148 | 208                   | 201 |  | 141                  | 144 | 146 | 142             | 141 | 147 |
| 2.97E-07 | 194                   | 194 | 194 | 151                  | 147 | 149 | 149             | 150 | 150 | 197                   | 188 |  | 144                  | 143 | 145 | 146             | 143 | 146 |
| 1.48E-07 | 185                   | 183 | 181 | 149                  | 146 | 147 | 148             | 149 | 150 | 186                   | 180 |  | 144                  | 143 | 142 | 141             | 143 | 143 |
| 7.42E-08 | 173                   | 172 | 169 | 149                  | 148 | 148 | 148             | 148 | 151 | 173                   | 172 |  | 146                  | 143 | 147 | 146             | 144 | 145 |
| 3.71E-08 | 160                   | 157 | 160 | 149                  | 147 | 148 | 150             | 148 | 149 | 164                   | 163 |  | 143                  | 141 | 143 | 142             | 139 | 144 |
| 1.86E-08 | 153                   | 153 | 157 | 151                  | 149 | 150 | 150             | 147 | 152 | 160                   | 159 |  | 142                  | 143 | 146 | 145             | 142 | 142 |
| 9.28E-09 | 153                   | 152 | 152 | 149                  | 149 | 150 | 151             | 147 | 147 | 157                   | 155 |  | 142                  | 145 | 146 | 141             | 139 | 143 |
| 4.64E-09 | 152                   | 152 | 150 | 149                  | 150 | 149 | 148             | 147 | 149 | 152                   | 153 |  | 140                  | 141 | 144 | 145             | 141 | 144 |
| 2.32E-09 | 149                   | 150 | 151 | 151                  | 151 | 149 | 151             | 146 | 149 | 152                   | 152 |  | 143                  | 141 | 143 | 141             | 139 | 141 |
| 1.16E-09 | 150                   | 151 | 151 | 149                  | 149 | 149 | 151             | 148 | 148 | 152                   | 151 |  | 142                  | 142 | 146 | 143             | 140 | 143 |
| 5.8E-10  | 152                   | 149 | 152 | 149                  | 149 | 151 | 149             | 149 | 148 | 152                   | 151 |  | 145                  | 144 | 146 | 144             | 145 | 148 |
| 2.9E-10  | 151                   | 151 | 149 | 149                  | 150 | 152 | 149             | 147 | 150 | 148                   | 149 |  | 144                  | 144 | 147 | 144             | 143 | 146 |

| Molar    | 7-L0 |     |     | 7-L1 |     |     | 7-L2 |     |     | 7-L3 |     |     | 7-L4 |     |     | 7-L5 |     |     |
|----------|------|-----|-----|------|-----|-----|------|-----|-----|------|-----|-----|------|-----|-----|------|-----|-----|
| 9.5E-06  | 214  | 222 | 226 | 165  | 170 | 173 | 175  | 184 | 182 | 184  | 180 | 176 | 167  | 171 | 171 | 162  | 168 | 165 |
| 4.75E-06 | 213  | 214 | 219 | 164  | 162 | 163 | 164  | 164 | 169 | 173  | 168 | 168 | 160  | 162 | 169 | 153  | 160 | 161 |
| 2.38E-06 | 206  | 208 | 210 | 160  | 163 | 163 | 158  | 159 | 161 | 160  | 166 | 157 | 156  | 159 | 161 | 153  | 154 | 156 |
| 1.19E-06 | 205  | 202 | 205 | 155  | 160 | 156 | 150  | 154 | 151 | 157  | 156 | 153 | 154  | 159 | 156 | 153  | 149 | 150 |
| 5.94E-07 | 196  | 198 | 200 | 157  | 155 | 158 | 148  | 148 | 153 | 155  | 151 | 151 | 154  | 155 | 157 | 151  | 152 | 154 |
| 2.97E-07 | 190  | 193 | 193 | 151  | 155 | 153 | 150  | 150 | 152 | 155  | 153 | 151 | 153  | 153 | 158 | 149  | 152 | 154 |
| 1.48E-07 | 180  | 178 | 184 | 151  | 155 | 151 | 145  | 149 | 148 | 146  | 149 | 147 | 151  | 153 | 155 | 150  | 151 | 151 |
| 7.42E-08 | 160  | 162 | 163 | 150  | 154 | 156 | 146  | 144 | 147 | 147  | 148 | 147 | 151  | 151 | 153 | 151  | 149 | 154 |
| 3.71E-08 | 150  | 150 | 154 | 147  | 149 | 151 | 143  | 147 | 145 | 148  | 148 | 146 | 149  | 150 | 152 | 146  | 146 | 147 |
| 1.86E-08 | 148  | 149 | 149 | 150  | 152 | 153 | 146  | 146 | 149 | 150  | 149 | 144 | 149  | 152 | 151 | 147  | 148 | 150 |
| 9.28E-09 | 145  | 146 | 148 | 148  | 153 | 151 | 144  | 148 | 147 | 148  | 147 | 140 | 152  | 153 | 153 | 147  | 148 | 149 |
| 4.64E-09 | 149  | 147 | 149 | 151  | 151 | 150 | 146  | 145 | 145 | 148  | 146 | 148 | 149  | 151 | 149 | 149  | 151 | 149 |
| 2.32E-09 | 145  | 146 | 146 | 149  | 153 | 154 | 147  | 147 | 147 | 146  | 148 | 146 | 150  | 151 | 152 | 149  | 147 | 151 |
| 1.16E-09 | 147  | 148 | 148 | 152  | 154 | 153 | 147  | 144 | 147 | 144  | 147 | 148 | 151  | 151 | 155 | 149  | 150 | 151 |
| 5.8E-10  | 147  | 145 | 149 | 151  | 150 | 152 | 148  | 146 | 147 | 146  | 145 | 147 | 155  | 150 | 152 | 148  | 151 | 148 |
| 2.9E-10  | 148  | 146 | 149 | 146  | 150 | 153 | 147  | 146 | 148 | 147  | 144 | 146 | 152  | 149 | 153 | 150  | 151 | 147 |

## 7.2. Inhibition Assays

### 7.2.1. Thrombin

#### Protocol

Protocol was adapted from Habeshian et al.<sup>12</sup>. A 16-point dilution series of inhibitor was performed starting at 33  $\mu$ M in Tris buffer (100 mM Tris-Cl, 150 mM NaCl, 10 mM MgCl<sub>2</sub>, 1 mM CaCl<sub>2</sub>, 2% DMSO). 9  $\mu$ L from each dilution point was mixed with 3  $\mu$ L thrombin solution (9 nM, in Tris buffer) and 3  $\mu$ L Z-Gly-Gly-Arg-AMC solution (225  $\mu$ M, in Tris buffer) in black 384-well plates. Fluorescence (excitation at 360 nm, emission at 465 nm) was measured every 3 min for 30 min. The slopes were normalized & fitted, in order to calculate IC<sub>50</sub> using Prism 10. Data was measured in triplicate.

**Table S20: Raw data from main text figure 3 (normalized to 0-100)**

| Molar    | 4-L0     |          |          | 4-L1     |          |          | 4-L2  |       |       |
|----------|----------|----------|----------|----------|----------|----------|-------|-------|-------|
| 0.00002  | 0        | 9.219858 | 3.76773  | 10       | 0.833333 | 3.466667 | 2.47  | 7     | 5.57  |
| 0.00001  | 12.36702 | 4.698582 | 4.609929 | 6.2      | 0        | 4.533333 | 1.53  | 0     | 3.27  |
| 0.000005 | 35.50532 | 38.07624 | 21.98582 | 7.566667 | 7.066667 | 4.3      | 6.8   | 5.83  | 6.7   |
| 2.5E-06  | 62.6773  | 93.88298 | 63.65248 | 8.5      | 4.866667 | 6.4      | 8.07  | 8.3   | 12.07 |
| 1.25E-06 | 73.00532 | 85.10638 | 74.64539 | 14.2     | 11.96667 | 19.73333 | 22.37 | 15.57 | 19.97 |
| 6.25E-07 | 74.42376 | 80.80674 | 94.41489 | 20.76667 | 27.56667 | 15.66667 | 32.87 | 30.93 | 42.23 |
| 3.13E-07 | 81.02837 | 76.46277 | 94.7695  | 44.1     | 55       | 47.6     | 57.77 | 50.83 | 57.5  |
| 1.56E-07 | 84.7961  | 76.24113 | 82.53546 | 64.06667 | 62.6     | 55.76667 | 66.53 | 71.97 | 57.6  |
| 7.81E-08 | 82.53546 | 93.61702 | 74.51241 | 73.56667 | 77.6     | 76.7     | 83.7  | 66.9  | 43.47 |
| 3.91E-08 | 84.35284 | 82.18085 | 79.16667 | 78.23333 | 79.56667 | 64.63333 | 85.9  | 83.63 | 53.5  |
| 1.95E-08 | 85.90426 | 92.64184 | 99.1578  | 78.36667 | 84.23333 | 78.93333 | 83.27 | 88.07 | 76.47 |
| 9.77E-09 | 87.6773  | 98.49291 | 88.82979 | 79.1     | 68.6     | 85.26667 | 87.07 | 80.4  | 66.33 |
| 4.88E-09 | 96.09929 | 80.93972 | 93.48404 | 87.23333 | 78.6     | 75.8     | 93.97 | 78.37 | 66.53 |
| 2.44E-09 | 79.92021 | 95.70035 | 97.78369 | 85.26667 | 79.46667 | 85.46667 | 90.6  | 85.5  | 76.03 |
| 1.22E-09 | 99.86702 | 86.17021 | 97.20745 | 100      | 81.76667 | 82.73333 | 100   | 77.43 | 73.8  |
| 6.1E-10  | 100      | 83.33333 | 98.71454 | 98.36667 | 93.23333 | 94.56667 | 97.8  | 85.2  | 86.43 |

| Molar    | 4-L3     |          |          | 4-L4     |          |          | 4-L5     |          |          | Control (Buffer) |          |          |
|----------|----------|----------|----------|----------|----------|----------|----------|----------|----------|------------------|----------|----------|
| 0.00002  | 3.966667 | 0        | 2.8      | 9.033333 | 0        | 2.533333 | 1.930164 | 0        | 0.737085 | 87.1789          | 83.87615 | 81.5367  |
| 0.00001  | 6.7      | 8.066667 | 5.6      | 5.733333 | 10.2     | 5.6      | 6.052845 | 3.991505 | 2.092573 | 71.76606         | 80.16055 | 73.55505 |
| 0.000005 | 7.133333 | 7.9      | 13.8     | 13       | 14.8     | 9.7      | 18.48335 | 23.48054 | 11.29989 | 88.41743         | 89.58716 | 84.63303 |
| 2.5E-06  | 27.06667 | 38.8     | 35.43333 | 40.63333 | 33.6     | 29.26667 | 23.7304  | 35.03654 | 22.4811  | 71.69725         | 73.89908 | 65.57339 |
| 1.25E-06 | 49.23333 | 49.83333 | 49.63333 | 60.66667 | 56.6     | 46.53333 | 57.96115 | 45.46817 | 71.39109 | 85.80275         | 82.22477 | 83.4633  |
| 6.25E-07 | 59.56667 | 55.7     | 63.53333 | 77.8     | 67.46667 | 62.8     | 66.45637 | 78.01237 | 54.58804 | 85.80275         | 73.48624 | 73.48624 |
| 3.13E-07 | 70.9     | 70.46667 | 75.7     | 92.23333 | 80.03333 | 98.63333 | 73.63983 | 100      | 64.0827  | 80.50459         | 100.3899 | 85.66514 |
| 1.56E-07 | 86.43333 | 84.13333 | 81       | 82.93333 | 77.5     | 81.33333 | 75.39447 | 73.88969 | 67.45581 | 73.62385         | 72.86697 | 78.50917 |
| 7.81E-08 | 81.9     | 90.13333 | 82.7     | 93.1     | 100      | 92.9     | 78.01237 | 82.01012 | 77.13786 | 86.00917         | 106.1697 | 107.8211 |
| 3.91E-08 | 93.13333 | 90.33333 | 84.03333 | 79.1     | 88.56667 | 88.1     | 92.82778 | 75.32638 | 83.70229 | 80.98624         | 81.46789 | 91.23853 |
| 1.95E-08 | 90.36667 | 100      | 82.1     | 77.53333 | 96.33333 | 91.4     | 77.70004 | 78.07483 | 79.76138 | 97.63761         | 87.11009 | 93.57798 |
| 9.77E-09 | 90.7     | 90.56667 | 94.96667 | 90.16667 | 74.73333 | 75.5     | 75.70117 | 85.39447 | 86.19527 | 89.65596         | 82.01835 | 83.53211 |
| 4.88E-09 | 95.3     | 94.2     | 79.93333 | 87.93333 | 79.2     | 86.76667 | 85.13336 | 95.13898 | 73.01518 | 97.01835         | 78.85321 | 92.8211  |
| 2.44E-09 | 75.4     | 89.7     | 77.56667 | 68.26667 | 77.3     | 97.9     | 80.01124 | 84.82104 | 86.25773 | 85.87156         | 87.52294 | 84.42661 |
| 1.22E-09 | 94.1     | 94.23333 | 79.86667 | 93.86667 | 93.56667 | 96.13333 | 86.63252 | 93.01518 | 90.00562 | 83.32569         | 75.55046 | 93.85321 |
| 6.1E-10  | 91.96667 | 94.5     | 82.53333 | 90.96667 | 83.83333 | 95.56667 | 88.38154 | 93.0664  | 83.94653 | 81.94954         | 88.69266 | 96.46789 |

### 7.2.2. PLAP

#### Protocol

500  $\mu$ M of inhibitor was used as a starting point for a 16-point serial dilution in 10% DMSO/activation buffer in PCR tubes. Separately a 12.5 nM solution of PLAP and a 4.5 mM solution of para-Nitrophenylphosphate (pNPP) were prepared in activation buffer. 8  $\mu$ L of each inhibitor dilution was mixed with 16  $\mu$ L of enzyme solution and 16  $\mu$ L of pNPP solution

and gently mixed. The assay was allowed to develop in the dark for 30 min (activation buffer pH 10) or 1 hour (activation buffer pH 9). 50  $\mu$ L of 2M NaOH was then added to quench the reaction. Readout was performed to detect 405 nm vs 620 nm absorption. Data was fitted using Prism 10.

Activation buffer pH 10: 150 mM diethanolamine, 1 mM MgCl<sub>2</sub>, 60 mM ZnCl<sub>2</sub> in mQ, pH 9.8

Activation buffer pH 9: 150 mM Tris, 1 mM MgCl<sub>2</sub>, 60 mM ZnCl<sub>2</sub> in mQ, pH 9.0

**Table S21: Raw data from main text figure 5**

| Molar    | 21       |          |         | 22       |          |          | Control (Buffer) |          |          |
|----------|----------|----------|---------|----------|----------|----------|------------------|----------|----------|
| 0.000094 | 2.160448 | 1.8882   | 1.7352  | 1.308566 | 1.412264 | 1.410981 | 10.1229          | 15.88783 | 12.78408 |
| 0.000047 | 2.053407 | 1.83402  | 1.7784  | 1.190431 | 1.356464 | 1.280874 | 9.508104         | 12.40108 | 10.44102 |
| 2.35E-05 | 2.181977 | 2.2113   | 1.9125  | 1.345884 | 1.294212 | 1.326716 | 10.5104          | 14.49151 | 10.13774 |
| 1.18E-05 | 2.528193 | 2.84445  | 2.28195 | 1.3961   | 1.473568 | 1.735486 | 10.92738         | 12.94216 | 9.645317 |
| 5.88E-06 | 3.371676 | 4.2435   | 3.65391 | 1.681483 | 1.861429 | 2.093343 | 10.7156          | 13.37392 | 10.93694 |
| 2.94E-06 | 5.854464 | 6.340168 | 5.60178 | 4.625252 | 3.0616   | 4.158456 | 11.66364         | 15.45775 | 10.12572 |
| 1.47E-06 | 9.641026 | 9.68014  | 8.5113  | 8.708464 | 6.984405 | 6.016603 | 11.73036         | 14.14994 | 11.49372 |
| 7.34E-07 | 12.61068 | 11.6154  | 11.4417 | 11.09918 | 8.475036 | 9.31695  | 12.12883         | 14.35842 | 11.08245 |
| 3.67E-07 | 10.20285 | 12.25529 | 10.6056 | 9.669974 | 9.319807 | 12.84496 | 10.32531         | 13.669   | 10.25505 |
| 1.84E-07 | 10.49401 | 10.5579  | 11.1006 | 12.37951 | 9.350328 | 9.015625 | 10.43914         | 11.69634 | 11.81269 |
| 9.18E-08 | 11.10922 | 12.1275  | 11.241  | 10.77756 | 11.83205 | 13.93002 | 11.97655         | 14.83844 | 13.02176 |
| 4.59E-08 | 11.01839 | 12.1374  | 12.4101 | 11.38569 | 12.93865 | 13.98826 | 12.86965         | 12.5491  | 12.50711 |
| 2.29E-08 | 11.97471 | 8.18055  | 12.8052 | 13.06459 | 11.71577 | 10.38361 | 12.58264         | 13.20697 | 12.31791 |
| 1.15E-08 | 12.27474 | 13.5081  | 12.8052 | 13.31693 | 11.18338 | 13.62262 | 12.08655         | 13.17061 | 11.77494 |
| 5.74E-09 | 11.92789 | 11.898   | 11.7099 | 13.76168 | 11.99613 | 12.82038 | 11.75358         | 11.69505 | 9.757454 |
| 2.87E-09 | 10.70161 | 11.8449  | 11.43   | 13.33578 | 12.26459 | 14.52854 | 10.96198         | 14.02257 | 12.20126 |

#### Inhibition Experiment performed at pH 10

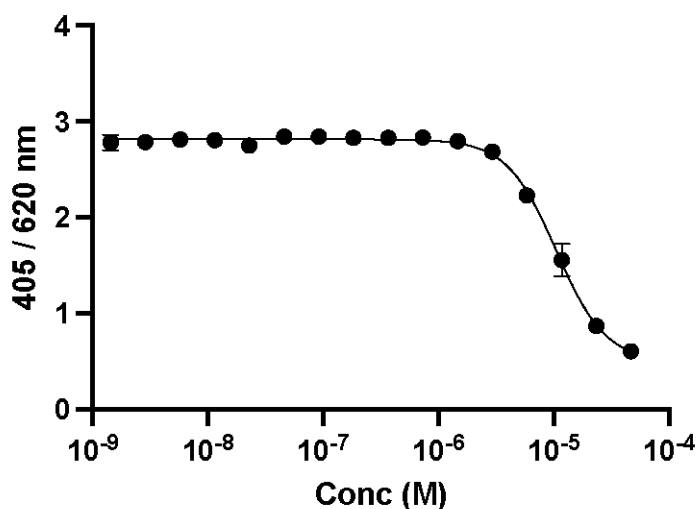

**Figure S84: Inhibitory assay of PLAP conjugate 29 (main text conjugate 21) at pH 10**

Determined fit: IC<sub>50</sub> = 21  $\mu$ M

|          |       |       |       |
|----------|-------|-------|-------|
| 0.000094 | 0.617 | 0.612 | 0.593 |
| 0.000047 | 0.856 | 0.909 | 0.853 |
| 2.35E-05 | 1.748 | 1.485 | 1.439 |
| 1.18E-05 | 2.288 | 2.24  | 2.167 |
| 5.88E-06 | 2.683 | 2.721 | 2.666 |
| 2.94E-06 | 2.753 | 2.841 | 2.804 |
| 1.47E-06 | 2.793 | 2.861 | 2.855 |

|          |       |       |       |
|----------|-------|-------|-------|
| 7.34E-07 | 2.785 | 2.861 | 2.847 |
| 3.67E-07 | 2.795 | 2.837 | 2.867 |
| 1.84E-07 | 2.794 | 2.88  | 2.858 |
| 9.18E-08 | 2.806 | 2.863 | 2.865 |
| 4.59E-08 | 2.7   | 2.736 | 2.816 |
| 2.29E-08 | 2.73  | 2.841 | 2.857 |
| 1.15E-08 | 2.764 | 2.833 | 2.844 |
| 5.74E-09 | 2.723 | 2.8   | 2.844 |
| 2.87E-09 | 2.732 | 2.743 | 2.876 |

## 8. Unprocessed Gel Images

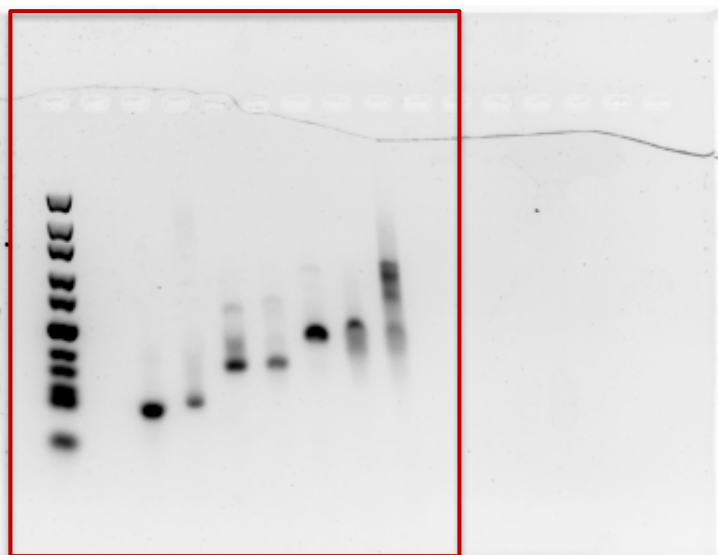

Figure S85: Unprocessed agarose gel electrophoresis of figure S27 panel A

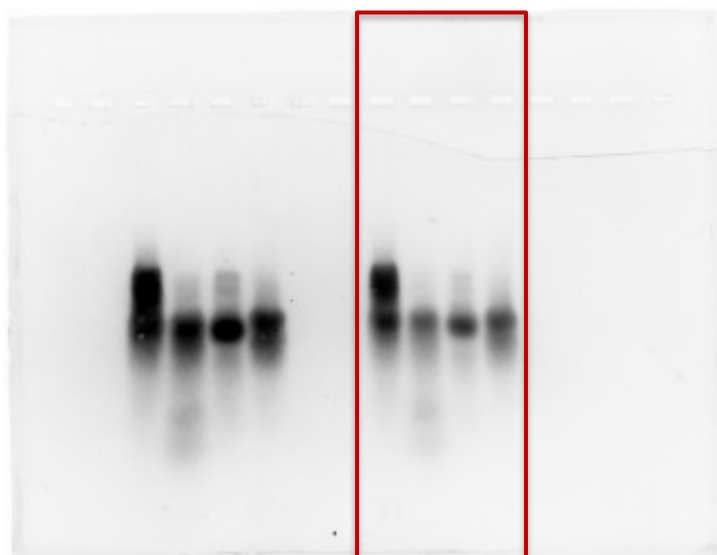

Figure S86: Unprocessed agarose gel electrophoresis of figure S27 panel B-1

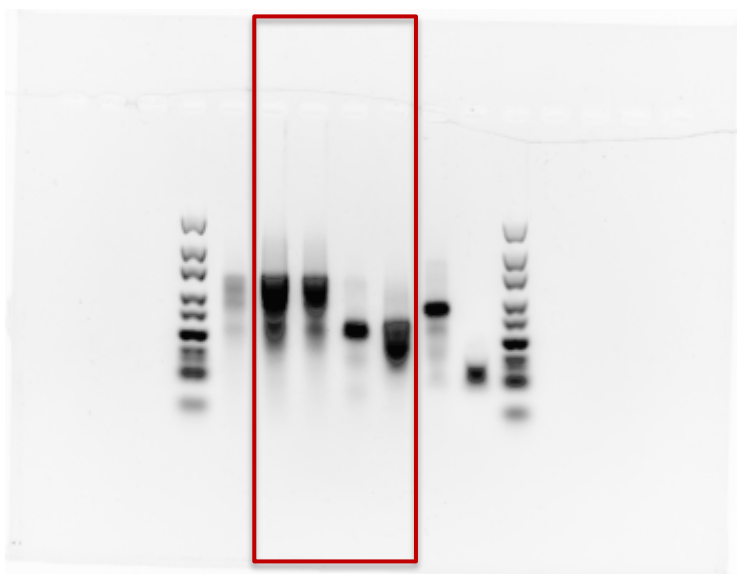

Figure S87: Unprocessed agarose gel electrophoresis of figure S27 panel B-2

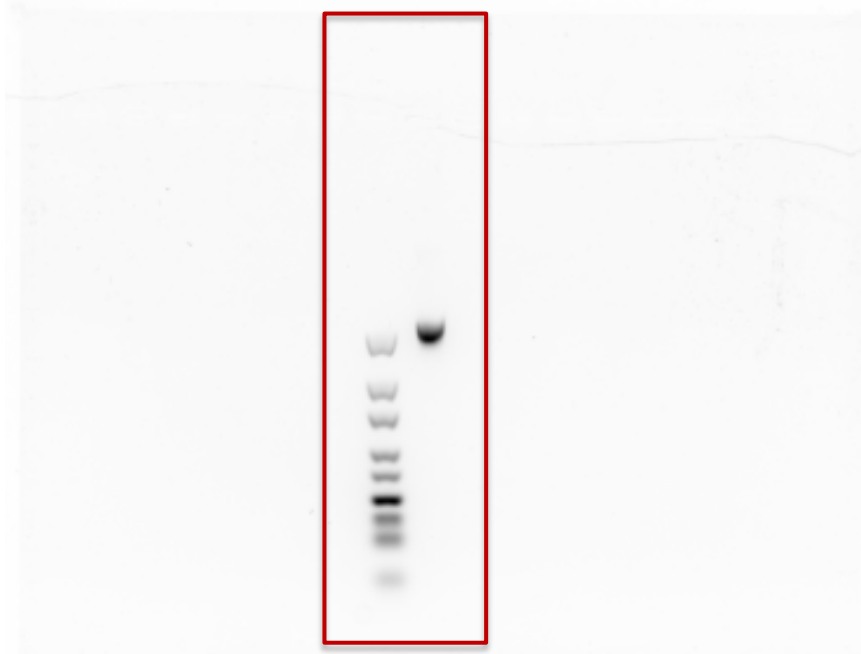

Figure S88: Unprocessed agarose gel electrophoresis of figure S31

## References

- 1 *Alkaline Agarose Gel Electrophoresis*, <[https://tools.thermofisher.com/content/sfs/manuals/MAN0011923\\_Alkaline\\_Agarose\\_Gel\\_Electrophoresis\\_UG.pdf](https://tools.thermofisher.com/content/sfs/manuals/MAN0011923_Alkaline_Agarose_Gel_Electrophoresis_UG.pdf)> (2012).
- 2 Monty, O. B. C., Simmons, N., Chamakuri, S., Matzuk, M. M. & Young, D. W. Solution-Phase Fmoc-Based Peptide Synthesis for DNA-Encoded Chemical Libraries: Reaction Conditions, Protecting Group Strategies, and Pitfalls. *ACS Comb Sci* **22**, 833-843, doi:10.1021/acscmbosci.0c00144 (2020).
- 3 Puglioli, S. *et al.* Selective tumor targeting enabled by picomolar fibroblast activation protein inhibitors isolated from a DNA-encoded affinity maturation library. *Chem*, doi:<https://doi.org/10.1016/j.chempr.2022.10.006> (2022).
- 4 Pham, M. V., Bergeron-Brlek, M. & Heinis, C. Synthesis of DNA-Encoded Disulfide- and Thioether-Cyclized Peptides. *ChemBioChem* **21**, 543-549, doi:<https://doi.org/10.1002/cbic.201900390> (2020).
- 5 Plais, L. *et al.* Universal encoding of next generation DNA-encoded chemical libraries. *Chem Sci* **13**, 967-974, doi:10.1039/d1sc05721a (2022).
- 6 Karas, J. A. *et al.* 2-Nitroveratryl as a Photocleavable Thiol-Protecting Group for Directed Disulfide Bond Formation in the Chemical Synthesis of Insulin. *Chemistry – A European Journal* **20**, 9549-9552, doi:<https://doi.org/10.1002/chem.201403574> (2014).
- 7 Keller, M. *et al.* Highly pure DNA-encoded chemical libraries by dual-linker solid-phase synthesis. *Science* **384**, 1259-1265, doi:10.1126/science.adn3412 (2024).
- 8 Binette, R., Desgagné, M., Theaud, C. & Boudreault, P.-L. Efficient Fmoc-Protected Amino Ester Hydrolysis Using Green Calcium(II) Iodide as a Protective Agent. *Molecules* **27**, 2788 (2022).
- 9 Decurtins, W. *et al.* Automated Screening for Small Organic Ligands Using DNA-Encoded Chemical Libraries. *Nat. Protoc.* **11**, 764 (2016).
- 10 Ahlskog, J. K. *et al.* Human monoclonal antibodies targeting carbonic anhydrase IX for the molecular imaging of hypoxic regions in solid tumours. *Br J Cancer* **101**, 645-657, doi:10.1038/sj.bjc.6605200 (2009).
- 11 Onda, Y. *et al.* A DNA-encoded chemical library based on peptide macrocycles. *Chem. - Eur. J.* **27**, 7160 (2021).
- 12 Habeshian, S. *et al.* Synthesis and direct assay of large macrocycle diversities by combinatorial late-stage modification at picomole scale. *Nature Communications* **13**, doi:10.1038/s41467-022-31428-8 (2022).
